# Supplementary material for: Global, regional, and national causes of under-5 mortality in 2000–15: an updated systematic analysis with implications for the Sustainable Development Goals
Source: PubMed Central journal article supplement (PMC5161777; doi:10.1016/s0140-6736(16)31593-8), 2016-12-17
Supplement: mmc1.pdf [file mmc1.pdf]

# THE LANCET

## **Supplementary appendix**

This appendix formed part of the original submission and has been peer reviewed. We post it as supplied by the authors.

Supplement to: Liu L, Oza S, Hogan D, et al. Global, regional, and national causes of under-5 mortality in 2000–15: an updated systematic analysis with implications for the Sustainable Development Goals. *Lancet* 2016; published online Nov 10. [http://dx.doi.org/10.1016/S0140-6736\(16\)31593-8](http://dx.doi.org/10.1016/S0140-6736(16)31593-8).

## **Global, regional and national causes of under-5 mortality in 2000-2015 – an updated systematic analysis with implications for the Sustainable Development Goals**

Li Liu,<sup>1,2</sup> Shefali Oza,<sup>3</sup> Dan Hogan,<sup>4</sup> Yue Chu,<sup>2</sup> Jamie Perin,<sup>2</sup> Jun Zhu,<sup>5,6</sup> Joy Lawn,<sup>3</sup> Simon Cousens,<sup>3</sup> Colin Mathers,<sup>4</sup> Robert E. Black<sup>2</sup>

<sup>1</sup>Department of Population Family and Reproductive Health, Johns Hopkins Bloomberg School of Public Health, Baltimore, Maryland

<sup>2</sup>The Institute for International Programs, Department of International Health, Johns Hopkins Bloomberg School of Public Health, Baltimore, Maryland

<sup>3</sup>London School of Hygiene and Tropical Medicine, London, UK

<sup>4</sup>Department of Health Statistics and Informatics, World Health Organization, Geneva, Switzerland

<sup>5</sup>National Office of Maternal and Child Health Surveillance, Chengdu, China

<sup>6</sup>Key Laboratory of Birth Defects and Related Diseases of Women and Children (Sichuan University), Ministry of Education, Chengdu, Sichuan, China

Correspondence to: Dr. Li Liu, Department of Population, Family and Reproductive Health, and the Institute for International Programs, Department of International Health, Johns Hopkins Bloomberg School of Public Health, 615 N Wolfe Street, Baltimore, MD 21205, USA [lliu26@jhu.edu](mailto:lliu26@jhu.edu)

## **Supplementary webappendix**

Webappendix 1. Details of updated input data, modeling methods, and posthoc adjustment

Webappendix 2. GATHER checklist

Webappendix 3. Cause-specific mortality fractions (CSMFs) by MDG regions in 2015

Webappendix 4. CSMFs of the top 10 countries with the highest number of under-five deaths in 2015

Webappendix 5. CSMFs of the 10 countries with the highest U5MR in 2015

Webappendix 6. Estimated numbers of deaths by cause in neonates, children aged 1-59 months at the global, regional and country levels in 2000-2015

Webappendix 7. Global CSMFs in 2000-2015

Webappendix 8. Global cause-specific average annual rate of reduction in 2000-2015

Webappendix 9. Trends in cause-specific mortality rates in neonates and children aged 1-59 months by the MDG regions, 2000-2015

Webappendix 10. CSMFs by the MDG regions, 2000-2015

## Webappendix 1. Details of updated input data, modeling methods, and posthoc adjustment

### Updated systematic review

Input verbal autopsy (VA) studies used for VAMCM were updated. We searched literature published between January 1, 2013 and February 3, 2015 for neonates and between May 28, 2013 and February 12, 2015 for the 1-59 months age group.

Similar search strategies and exclusion/inclusion criteria as the previous estimation were applied and details can be found elsewhere.<sup>1,2</sup> We used DistillerSR,<sup>3</sup> an online systematic review software by Evidence Partners LLC, for literature screening, data abstraction and adjudication for systematic review.

In addition to published studies identified through systematic review, we included three sets of recent and known VA studies. They are the International Network for the Demographic Evaluation of Populations and their Health (INDEPTH) studies,<sup>4</sup> the Verbal Autopsy Social Autopsy (VASA) study,<sup>5</sup> and the India Million Death Study (MDS) 2004-2006.<sup>6</sup> Figure S1.1 below shows the number of input data points by estimation methods.

Figure S1.1 Number of input data points by estimation methods

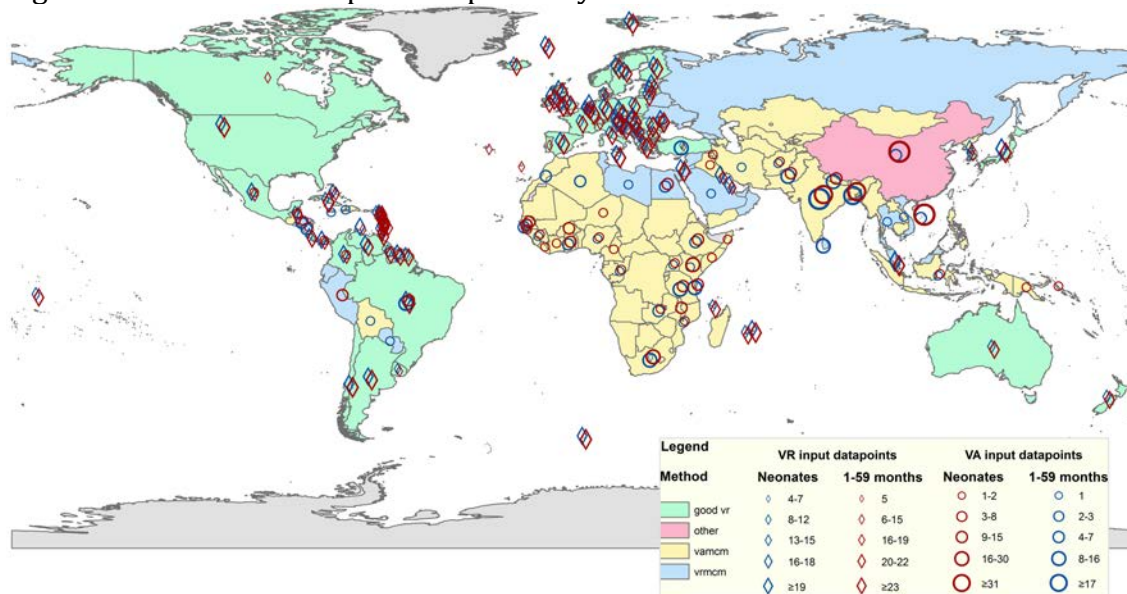

VR: vital registration; VA: verbal autopsy; VAMCM: verbal autopsy based multi-cause model; VRMCM: vital registration based multi-cause model

### INDEPTH

INDEPTH published cause-of-death data from 21 Health and Demographic Surveillance Sites (HDSSs) across Africa and Asia from 1992 to 2012.<sup>7</sup> We used these data for modeling cause-specific mortality fractions (CSMFs) among children aged 1 to 59 months. The same exclusion criteria used in the systematic review were applied.<sup>1,2</sup> In addition, three sites (Purworejo in Indonesia, Farafenni in the

Gambia, and Vadu in India) were excluded due to quality concern.<sup>4</sup> To determine the final study points, we first collapsed years when less than 25 deaths were reported to adjacent years within the same sites. We further collapsed years within sites while considering the availability of covariates (e.g. those from the Demographic and Health Surveys or Multiple Indicator Cluster Surveys) and the reference periods of the corresponding surveys to ensure compatibility between cause-of-death study points and site-specific covariates to our best ability. At the end, 35 study points from 16 HDSSs across 9 Africa and Asia countries were included, representing 12,970 deaths among children aged 1-59 months.

### **Use *Plasmodium falciparum* parasite rate in place of malaria index in the modeling of malaria**

The estimates of *Plasmodium falciparum* parasite rate (PfPR) were derived from the most recent global map of *Plasmodium falciparum* malaria endemicity by the Malaria Atlas Project (MAP), using a model-based geostatistical prediction that created a continuous surface of PfPR for every 5 km by 5 km pixel within the stable limits of *Plasmodium falciparum* malaria transmission.<sup>8-11</sup>

At the study level, site-year-specific values were obtained from the MAP global surface data for study sites with the highest possible resolution. If the study site was larger than one 25 km<sup>2</sup>, the mean from the entire study site was taken. If the study period was more than one year, we used average PfPR over time. Eight VA studies reported malaria deaths yet their corresponding PfPR was estimated to be zero. We used national PfPR values in this case to account for the possibility that those cases occurred among migrants lived in the study sites.

For national level PfPR used for the prediction of CSMFs, we smoothed PfPR using a 7-year-moving-average for countries in Africa with PfPR available from MAP. For countries without PfPR available from MAP, we used the most recent global surface from MAP and assumed constant value for 2000-2015. For countries with PfPR estimated to be zero, we adjusted cause-specific number of deaths during posthoc adjustment to ensure zero malaria deaths in these countries. Table S1.1 shows the set of covariates used in multinomial logistic regression by age group.

Table S1.1 Covariates used in multinomial logistic regression by age group

| Cause                 |                                                                 | VRMCM | VAMCM                           |
|-----------------------|-----------------------------------------------------------------|-------|---------------------------------|
| <b>Early neonatal</b> |                                                                 |       |                                 |
| Preterm               | (as base)                                                       |       | BCG; FemLit; GFR; LBW; SBA; PAB |
| Intrapartum           | FemLit                                                          |       | (as base)                       |
| Congenital            | IMR                                                             |       | Period; U5MR                    |
| Pneumonia             | GINI; GNI; U5MR                                                 |       | Period; LBW                     |
| Sepsis                | GINI; IMR                                                       |       | BCG; Period; LBW                |
| Other                 | GINI; ANC; LBW; FemLit; IMR                                     |       | BCG; LBW; Region                |
| Injuries              | GINI; GNI; U5MR; IMR                                            |       | N/A                             |
| Diarrhoea             | N/A                                                             |       | Period; NMR; Region; IMR; GFR   |
| Tetanus               | N/A                                                             |       | PAB; NMR; ANC; Period; BCG      |
| <b>Late neonate</b>   |                                                                 |       |                                 |
| Preterm               | (as base)                                                       |       | GFR; LBW; SBA; NMR; U5MR        |
| Intrapartum           | FemLit                                                          |       | (as base)                       |
| Congenital            | FemLit; U5MR                                                    |       | Period; SBA; U5MR; Region       |
| Pneumonia             | ANC; U5MR; GFR; NMR                                             |       | BCG; SBA                        |
| Sepsis                | GINI; LBW; NMR                                                  |       | ANC; FemLit; Period; PAB        |
| Other                 | ANC; LBW; FemLit; NMR                                           |       | PAB; ANC; BCG; Region           |
| Injuries              | GINI; U5MR                                                      |       | N/A                             |
| Diarrhoea             | N/A                                                             |       | LBW                             |
| Tetanus               | N/A                                                             |       | Period; NMR; Region             |
| <b>1-59 months</b>    |                                                                 |       |                                 |
| Pneumonia             | (as base)                                                       |       | (as base)                       |
| Diarrhoea             | Region; U5Pop; DPT3; GNI                                        |       | Year; U5MR; Urban               |
| Meningitis            | Region; year; HDI; Hib3                                         |       | GNI; MCV; Meningitis epidemic   |
| Perinatal             | Region; Hib3; DPT3; U5MR; SBA; Improved water source            |       | Period; Underweight             |
| Other I               | Region; HDI; Hib3; DPT3; SBA                                    |       | SBA                             |
| Other NCD             | Region; HDI; U5MR; Urban; Education index; GNI                  |       | SBA                             |
| Congenital            | Region; HDI; Hib3; U5MR; Urban; Education index                 |       | Period; Underweight             |
| Injuries              | Region; HDI; SBA; Education index; Improved water source; U5Pop |       | U5MR                            |
| Malaria               | N/A                                                             |       | PFPR                            |

Abbreviations: NCD: non-communicable diseases; N/A: not applicable; FemLit: female literacy; IMR: infant mortality rate; NMR: neonatal mortality rate; U5MR: under five mortality rate; GINI: Gini coefficient; GNI: gross national income per capita; ANC: antenatal care; LBW: low birth weight rate; GFR: gross fertility rate; SBA: deliveries assisted by skilled birth attendants; PAB: Neonates protected at birth against neonatal tetanus; BCG: Bacillus

Calmette–Guérin vaccine coverage; DPT3: Diphtheria-tetanus-pertussis vaccine third dose immunization coverage; U5Pop: under five population; HDI: human development index; HIB3: Haemophilus influenzae type b third dose immunization coverage; PFPR: Plasmodium falciparum parasite rate.

\* Note: actual covariates used in the model could be transformed (e.g. log, square root, exponentiation etc.) or used as dummy variables (e.g. period, region etc.) for the best fit. Detailed model equations could be found in the open access file:

<http://tinyurl.com/Hopkins-MNCH-cause-of-death>.

### Updated posthoc adjustment

We performed post-hoc adjustment to further account for the effect of *Pneumococcal* vaccine (PCV) and *Haemophilus influenzae* type B vaccine (Hib) on pneumonia and meningitis deaths, and the effect of rotavirus vaccine (Rota) on diarrhea deaths after modeling CSMFs for children aged 1-59 months using VAMCM.

There have been three types of PCV vaccine formulations, PCV7, PCV10 and PCV13. Different formulations cover different serotypes and different proportions of invasive pneumococcal disease (IPD) due to serotype variability across regions.<sup>12</sup> The actual coverage for PCV vaccine was calculated using the following equation:

$$C_{pcv} = \sum (D_{formulation} \times C_{formulation})$$

where  $C_{pcv}$  denotes coverage for PCV based on vaccine formulation.  $D_{formulation}$  represents region-specific percentage of IPD due to serotypes in each vaccine formulation. And  $C_{formulation}$  is the country-and-formulation-specific PCV coverage.

We calculated the numbers of cause-specific deaths due to pneumonia, meningitis and diarrhea that could have been averted by PCV, Hib and Rota separately. The numbers of deaths averted were calculated using the following equation:

$$CSN_{averted} = CSN_{modeled} \times SSP_{serotype} \times C \times Eff$$

where  $CSN_{averted}$  denotes the number of cause-specific deaths averted with vaccine use.  $CSN_{modeled}$  represents VAMCM modeled cause-specific deaths.  $SSP_{serotype}$  is the proportion of cause-specific deaths due to the vaccine-specific serotype if there were no vaccine coverage.  $C$  denotes vaccine coverage. And  $Eff$  is vaccine effectiveness (or efficacy if effectiveness is not available). Data sources for post-hoc adjustment parameters are presented in Table S1.2.

Table S1.2 Data sources of post-hoc adjustment parameters

| Parameters                                       | Hib                           |                           | PCV                                        |                           | Rota                               |
|--------------------------------------------------|-------------------------------|---------------------------|--------------------------------------------|---------------------------|------------------------------------|
| Variable as in WUENIC database                   | Hib3: 3 doses coverage        |                           | PCV3: 3 doses coverage                     |                           | rota_last: last dose administrated |
| Diseases directly affected by vaccine use        | Pneumonia                     | Meningitis                | Pneumonia                                  | Meningitis                | Diarrhea                           |
| <i>SSP</i> <sub>serotype</sub>                   | Watt, 2009 <sup>13</sup>      | Davis, 2013 <sup>14</sup> | O'Brien, 2009 <sup>15</sup>                | Davis, 2013 <sup>14</sup> | Lanata, 2013 <sup>16</sup>         |
| % of disease due to serotype in existing vaccine | Not applicable                |                           | Johnson, 2010 <sup>12</sup>                | Not applicable            |                                    |
| <i>C</i>                                         | WUENIC <sup>17</sup>          |                           | WUENIC <sup>17</sup>                       |                           | WUENIC <sup>17</sup>               |
| Vaccine formulation                              | Not applicable                |                           | WUENIC, <sup>17</sup> government estimates |                           | Not applicable                     |
| <i>Eff</i>                                       | Griffiths, 2012 <sup>18</sup> | Davis, 2013 <sup>14</sup> | Lucero, 2009 <sup>19*</sup>                | Davis, 2013 <sup>14</sup> | Lamberti, 2015 <sup>20*</sup>      |

WUENIC: WHO/UNICEF Estimates of National Immunization Coverage<sup>17</sup>

\*vaccine efficacy

PCV and Hib were considered to have relatively independent effect thus we assumed their effects were additive. Averted number of deaths due to pneumonia, meningitis or diarrhea were re-distributed to the remaining causes pro rata. The order in which the three causes were adjusted was taken into consideration by taking the average of all the permutations of the adjusting order.

Vaccine effectiveness was used when available. If there was no systematic review or meta-analysis published to provide evidence-based vaccine effectiveness estimates, vaccine efficacy was used instead. Rota effectiveness/efficacy on preventing severe rotavirus diarrhea was shown to vary across regions and was not available in all regions.<sup>20</sup> For VAMCM countries/regions lacking Rota efficacy data, we borrowed values from regions with data available based on the following rules (Table S1.3):

- For regions with low gross national income (GNI) per capita (regional mean GNI per capita for 2013-2015 was less than 5,000 current international dollar) and low urban population (regional mean of percent urban population for 2013-2015 was less than 50%), the efficacy value of Sub-Saharan Africa was used
- For regions with moderate GNI per capita (regional mean GNI per capita for 2013-2015 was between 5,000 and 6,000 current international dollar) and low urban population (regional mean of percent urban population for 2013-2015 was less than 50%), the efficacy value of Southern Asia was used



- For regions with high GNI per capita (regional mean GNI per capita for 2013-2015 was greater than or equal to 6,000 current international dollar) and high urban population (regional mean of percent urban population for 2013-2015 was greater than or equal to 50%), the effectiveness value of Latin America & Caribbean was used.

Table S1.3 Rotavirus vaccine effectiveness/efficacy approximation

| <b>Region</b>             | <b>Effectiveness /efficacy</b> | <b>Approximation where needed</b> |
|---------------------------|--------------------------------|-----------------------------------|
| Oceania                   | Efficacy                       | Sub-Saharan Africa                |
| Sub-Saharan Africa        | Efficacy                       |                                   |
| South-eastern Asia        | Efficacy                       | Southern Asia                     |
| Southern Asia             | Efficacy                       |                                   |
| Caucasus and Central Asia | Efficacy                       | Southern Asia                     |
| Eastern Asia              | Efficacy                       |                                   |
| Latin America & Caribbean | Effectiveness                  |                                   |
| Western Asia              | Effectiveness                  | Latin America & Caribbean         |
| Northern Africa           | Effectiveness                  | Latin America & Caribbean         |

#### **Potential bias in input data**

VAMCM models were built based on cause-of-deaths input data from verbal-autopsy studies. We used a systematic review approach to capture both published and major unpublished verbal-autopsy studies reporting causes of deaths information that met our inclusion/exclusion criteria. This could potentially suffer from reporting and/or publication bias, especially when some studies only reported leading causes of deaths. Many covariates used in the models like female literacy, vaccine coverage, low birth weight, and improved water source etc. came from large population surveys (e.g. Demographic and Health Surveys), which could be subject to underlying recall bias and other measurement errors.

Webappendix 2. GATHER checklist

| Item                                                                                           | Checklist item*                                      | Section(s) or sources providing information                                                                                                                |
|------------------------------------------------------------------------------------------------|------------------------------------------------------|------------------------------------------------------------------------------------------------------------------------------------------------------------|
| Objectives and funding                                                                         |                                                      |                                                                                                                                                            |
| 1                                                                                              | Estimated indicator and population                   | Methods                                                                                                                                                    |
| 2                                                                                              | Funding sources                                      | Funding section of summary                                                                                                                                 |
| Data Inputs                                                                                    |                                                      |                                                                                                                                                            |
| For all data inputs from multiple sources that are synthesized as part of the study:           |                                                      |                                                                                                                                                            |
| 3                                                                                              | Data identification                                  | Methods and appendix 1; Methods and appendix of previous publications <sup>1,2,21</sup>                                                                    |
| 4                                                                                              | Inclusion/exclusion criteria                         | Appendix 1; Methods and appendix of previous publications <sup>1,2,21</sup>                                                                                |
| 5                                                                                              | Included data sources and their main characteristics | Open access databases**                                                                                                                                    |
| 6                                                                                              | Potential important biases of input data             | Discussion and appendix 1                                                                                                                                  |
| For data inputs that contribute to the analysis but were not synthesized as part of the study: |                                                      |                                                                                                                                                            |
| 7                                                                                              | Source of other data inputs                          | Open access databases**                                                                                                                                    |
| For all data inputs:                                                                           |                                                      |                                                                                                                                                            |
| 8                                                                                              | Accessible input data files                          | Open access databases**                                                                                                                                    |
| Data analysis                                                                                  |                                                      |                                                                                                                                                            |
| 9                                                                                              | Conceptual overview of the data analysis method      | Methods and appendix of pervious publications. <sup>1,21</sup> List of model covariates inspired by Mosley-Chen framework of child survival. <sup>22</sup> |
| 10                                                                                             | Description of all steps of the analysis             | Methods and appendix of current and previous publications <sup>1,2,21</sup>                                                                                |
| 11                                                                                             | Model selection methods                              | Methods and appendix of current and previous publications <sup>1,2,21</sup>                                                                                |
| 12                                                                                             | Model performance and/or sensitivity analysis.       | Methods                                                                                                                                                    |
| 13                                                                                             | Uncertainty estimation methods                       | Methods and discussion; Methods and appendix of previous publications. <sup>1,2,21</sup>                                                                   |
| 14                                                                                             | Statistical code                                     | Open access databases**                                                                                                                                    |
| Results and discussion                                                                         |                                                      |                                                                                                                                                            |
| 15                                                                                             | Accessible estimates data files                      | Open access databases**                                                                                                                                    |

|    |                                                      |                        |
|----|------------------------------------------------------|------------------------|
| 16 | Uncertainty of the estimates                         | Results and discussion |
| 17 | Results interpretation in light of existing evidence | Results and discussion |
| 18 | Limitations of the estimates                         | Discussion             |

\*Detailed GATHER statement with explanation and elaboration of the items could be found on [gather - statement.org](http://gather-statement.org)

\*\* Open access databases with input files and analytical code of the study could be accessed on the Maternal and Child Epidemiology Estimates project website: <http://tinyurl.com/Hopkins-MNCH-cod-openaccess>

Webappendix 3. CSMFs by MDG regions in 2015\*

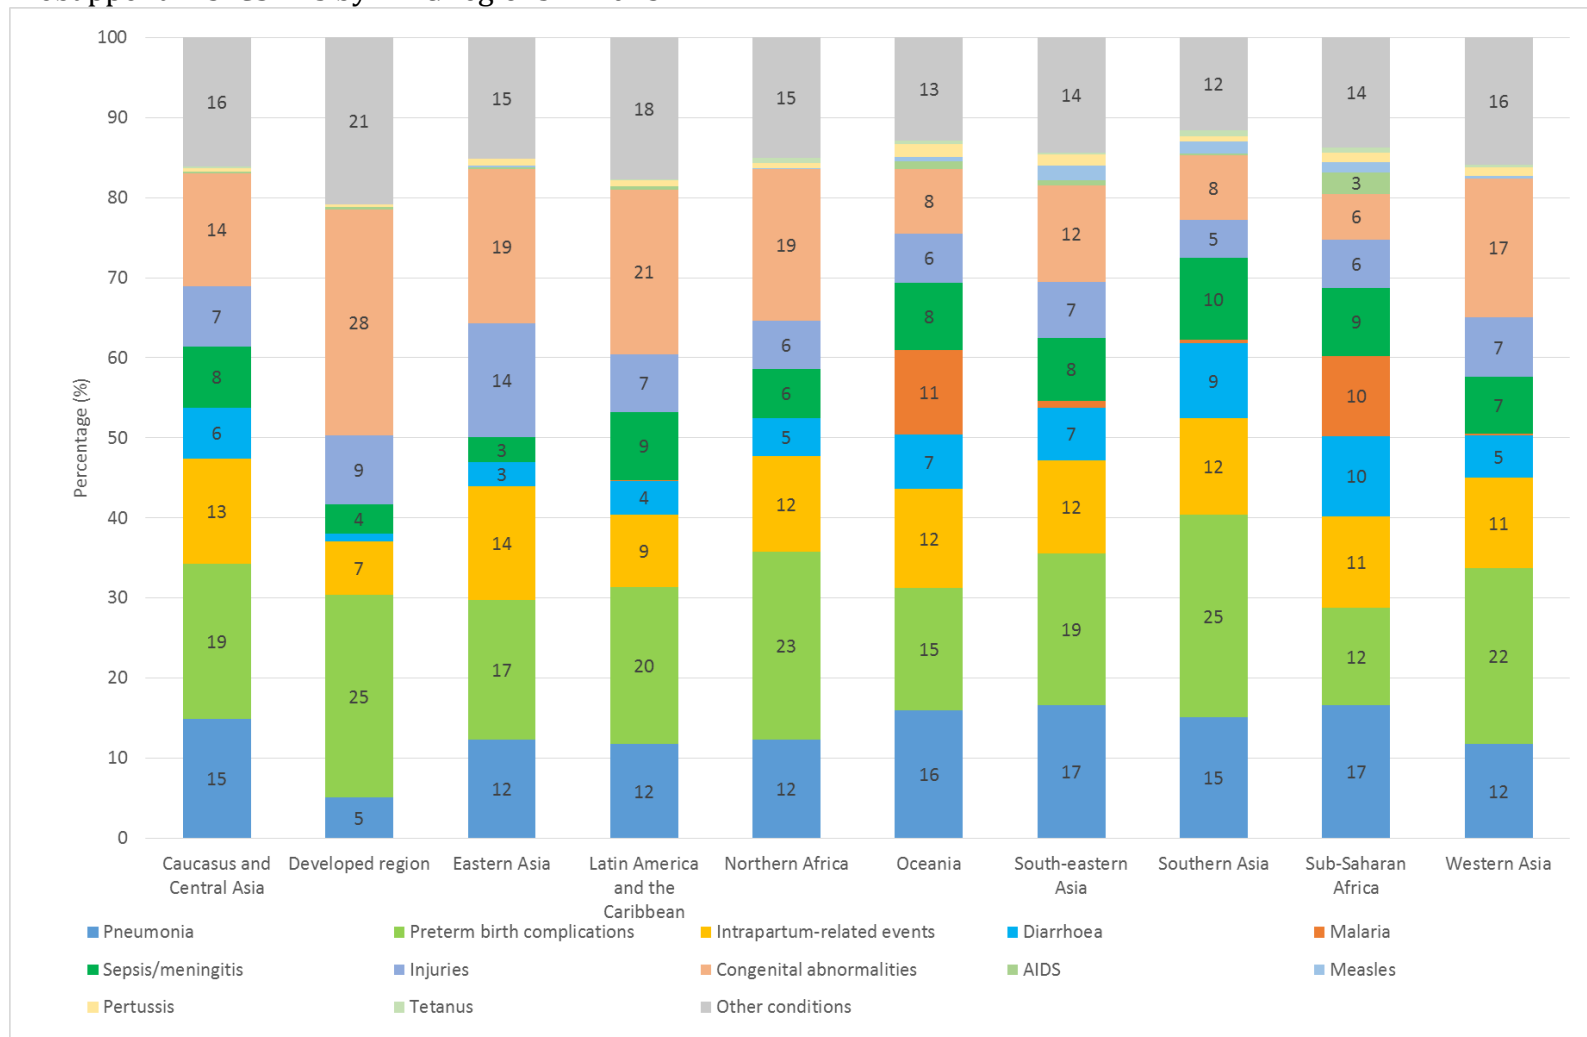

\*CSMFs are not labeled if less than 2%

Webappendix 4. CSMFs of the top 10 countries with the highest number of under-five deaths in 2015

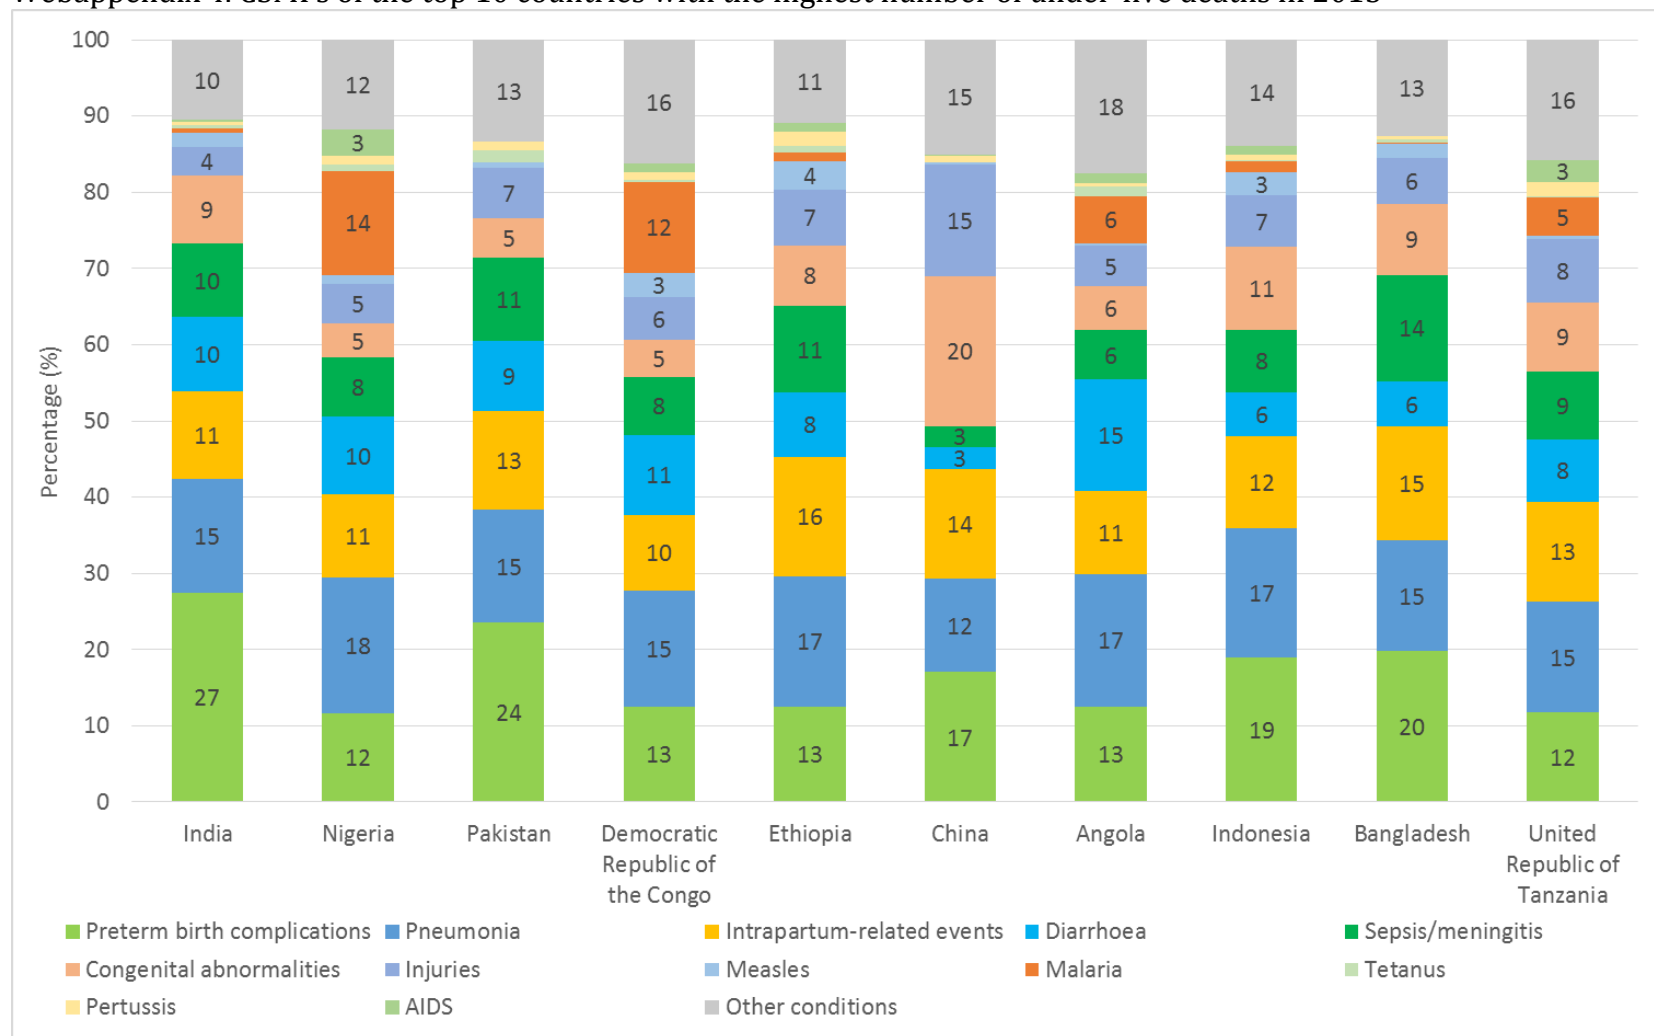

\*CSMFs are not labeled if less than 2%

Countries are ordered from the highest number of under-five deaths to the lowest from left to right.

### Webappendix 5. CSMFs of the 10 countries with the highest U5MR in 2015

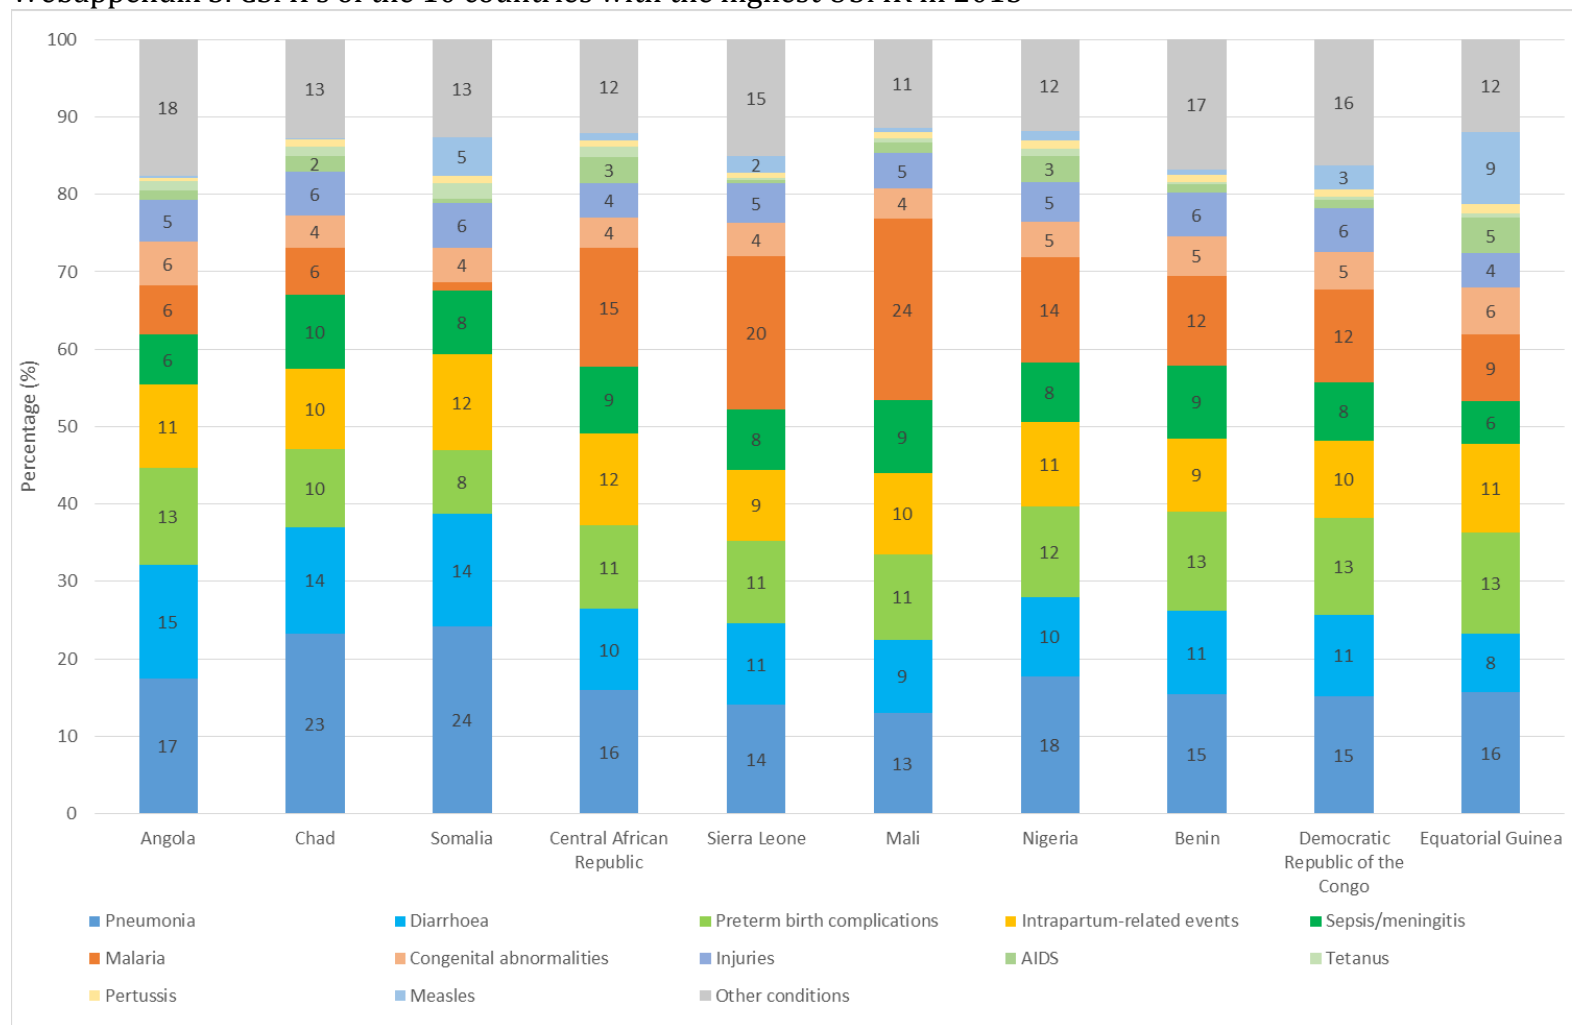

\*CSMFs are not labeled if less than 2%

Countries are ordered from the highest U5MR to the lowest from left to right.

Webappendix 6. Estimated numbers of deaths by cause in neonates, children aged 1-59 months at the global, regional and country levels in 2000-2015

| Year                      | 0-28 days        |                  |                  |                  |                  |                  |                  |                  |                  |                   | 1-59 months       |                  |                  |                  |                   |                  |                  |                   |                   |                   |                   |        |                   |       |
|---------------------------|------------------|------------------|------------------|------------------|------------------|------------------|------------------|------------------|------------------|-------------------|-------------------|------------------|------------------|------------------|-------------------|------------------|------------------|-------------------|-------------------|-------------------|-------------------|--------|-------------------|-------|
|                           | USD <sup>1</sup> | NEO <sup>2</sup> | PNE <sup>3</sup> | PRE <sup>4</sup> | INT <sup>5</sup> | SEP <sup>6</sup> | TET <sup>7</sup> | OTH <sup>8</sup> | CON <sup>9</sup> | DIA <sup>10</sup> | POS <sup>11</sup> | PNE <sup>3</sup> | PRE <sup>4</sup> | INT <sup>5</sup> | MEN <sup>12</sup> | OTH <sup>8</sup> | CON <sup>9</sup> | DIA <sup>10</sup> | MEA <sup>13</sup> | INJ <sup>14</sup> | MAL <sup>15</sup> | AIDS   | PER <sup>16</sup> |       |
| Global                    | 2000             | 9961990          | 3910377          | 296390           | 1210449          | 1048068          | 532415           | 161202           | 304609           | 316858            | 40386             | 6051613          | 1441712          | 128090           | 59043             | 284347           | 849579           | 241696            | 1172901           | 484821            | 387225            | 725282 | 220327            | 56589 |
| Global                    | 2001             | 9703848          | 3823722          | 284993           | 1192124          | 1022584          | 528765           | 143047           | 297488           | 316245            | 38476             | 5880126          | 1395385          | 126607           | 58780             | 280687           | 829143           | 239657            | 1106008           | 470785            | 378528            | 710707 | 226726            | 57113 |
| Global                    | 2002             | 9325912          | 3725881          | 272931           | 1169905          | 991866           | 524339           | 126165           | 289623           | 314424            | 36628             | 5600032          | 1337931          | 124853           | 58330             | 270475           | 805759           | 237200            | 1043050           | 364904            | 369399            | 700492 | 229988            | 57651 |
| Global                    | 2003             | 9093774          | 3624030          | 261525           | 1147729          | 958204           | 518605           | 111066           | 280405           | 311623            | 34873             | 5469744          | 1284643          | 121742           | 57384             | 268643           | 779084           | 231555            | 974976            | 421407            | 357978            | 684444 | 230534            | 57353 |
| Global                    | 2004             | 8728101          | 3518402          | 249294           | 1122329          | 923081           | 512465           | 97550            | 270465           | 310165            | 33052             | 5209700          | 1242929          | 120315           | 57021             | 252045           | 758023           | 229457            | 918105            | 315096            | 383307            | 648313 | 227726            | 57363 |
| Global                    | 2005             | 8397848          | 3422233          | 236820           | 1102846          | 890420           | 505503           | 865120           | 260011           | 308802            | 31310             | 4975615          | 1196526          | 118057           | 56401             | 247566           | 734159           | 225493            | 860922            | 295887            | 345901            | 615134 | 222208            | 57294 |
| Global                    | 2006             | 8030261          | 3328401          | 224844           | 1080418          | 861296           | 497736           | 77301            | 249962           | 307428            | 29416             | 4701860          | 1164617          | 117555           | 56048             | 213561           | 718433           | 224649            | 814743            | 189851            | 343638            | 586959 | 214527            | 57289 |
| Global                    | 2007             | 7700945          | 3243240          | 213994           | 1061296          | 833240           | 492540           | 69711            | 240535           | 304230            | 27693             | 4457705          | 1118342          | 116741           | 55430             | 203232           | 704077           | 223252            | 769816            | 120105            | 339627            | 546643 | 202888            | 57551 |
| Global                    | 2008             | 7483245          | 3163636          | 205037           | 1041859          | 805607           | 487345           | 62716            | 233280           | 301790            | 26002             | 4319610          | 1076534          | 115417           | 54788             | 209323           | 689113           | 219658            | 725038            | 127845            | 356425            | 501552 | 186151            | 57766 |
| Global                    | 2009             | 7238082          | 3090280          | 197100           | 1024963          | 779690           | 480354           | 56811            | 226649           | 300294            | 24419             | 4147802          | 1012084          | 115746           | 55085             | 175167           | 688376           | 218739            | 696588            | 151336            | 335841            | 471832 | 169240            | 57767 |
| Global                    | 2010             | 7016748          | 3020837          | 190035           | 1012954          | 752476           | 469127           | 52269            | 219304           | 301514            | 23157             | 3995911          | 981982           | 115202           | 55538             | 157361           | 679828           | 217871            | 660876            | 124870            | 367776            | 428425 | 147880            | 58301 |
| Global                    | 2011             | 6798461          | 2949328          | 183802           | 1000043          | 725452           | 454170           | 48575            | 212446           | 302860            | 21980             | 3849133          | 947844           | 114763           | 55944             | 149452           | 671007           | 214671            | 626967            | 160001            | 331587            | 385802 | 131790            | 59306 |
| Global                    | 2012             | 6535191          | 2880775          | 177590           | 989203           | 698510           | 439262           | 44886            | 206413           | 303977            | 20934             | 3654416          | 901349           | 113647           | 56410             | 153998           | 660926           | 210984            | 590996            | 109600            | 328708            | 353850 | 113986            | 59962 |
| Global                    | 2013             | 6348818          | 2808809          | 171506           | 974318           | 673008           | 424863           | 40970            | 199924           | 304300            | 19919             | 3540009          | 843225           | 114263           | 58277             | 135011           | 667476           | 209592            | 568229            | 120639            | 331671            | 335943 | 97936             | 57748 |
| Global                    | 2014             | 6132134          | 2745066          | 166385           | 959498           | 651527           | 413548           | 37265            | 193173           | 304885            | 18786             | 3387068          | 792474           | 113488           | 58657             | 122613           | 664013           | 208786            | 535929            | 95092             | 330431            | 321704 | 88152             | 55729 |
| Global                    | 2015             | 5941937          | 2680667          | 161142           | 943318           | 631385           | 401577           | 33944            | 186730           | 304934            | 17637             | 3261270          | 759944           | 112062           | 57776             | 115093           | 654125           | 207077            | 508745            | 73838             | 326464            | 306371 | 85784             | 53990 |
| Caucasus and Central Asia | 2000             | 87742            | 36620            | 2304             | 14756            | 8630             | 3888             | 433              | 2276             | 4089              | 244               | 51122            | 15020            | 1194             | 1394              | 2655             | 11902            | 3571              | 10263             | 20                | 4725              | 0      | 147               | 229   |
| Caucasus and Central Asia | 2001             | 82764            | 35517            | 2209             | 14206            | 8329             | 3835             | 383              | 2223             | 4112              | 220               | 47247            | 13916            | 1122             | 1311              | 2424             | 11062            | 3428              | 9099              | 18                | 4460              | 0      | 181               | 225   |
| Caucasus and Central Asia | 2002             | 78819            | 34669            | 2134             | 13713            | 8115             | 3803             | 341              | 2191             | 4173              | 198               | 44150            | 13020            | 1065             | 1247              | 2224             | 10386            | 3336              | 8152              | 31                | 4254              | 0      | 210               | 225   |
| Caucasus and Central Asia | 2003             | 75775            | 34195            | 2085             | 13333            | 8013             | 3796             | 307              | 2189             | 4291              | 180               | 41580            | 12278            | 1015             | 1192              | 2052             | 9823             | 3244              | 7369              | 45                | 4088              | 0      | 239               | 235   |
| Caucasus and Central Asia | 2004             | 73538            | 33799            | 2042             | 12961            | 7939             | 3797             | 276              | 2198             | 4422              | 164               | 39739            | 11750            | 995              | 1147              | 1919             | 9427             | 3221              | 6765              | 24                | 3982              | 0      | 268               | 242   |
| Caucasus and Central Asia | 2005             | 71980            | 33734            | 2020             | 12713            | 7939             | 3853             | 253              | 2224             | 4579              | 152               | 38246            | 11316            | 972              | 1119              | 1806             | 9096             | 3205              | 6251              | 38                | 3899              | 0      | 294               | 249   |
| Caucasus and Central Asia | 2006             | 70935            | 33753            | 2004             | 12509            | 7940             | 3949             | 232              | 2249             | 4727              | 142               | 37182            | 11020            | 955              | 1106              | 1720             | 8867             | 3215              | 5846              | 25                | 3855              | 0      | 311               | 261   |
| Caucasus and Central Asia | 2007             | 70210            | 33946            | 1997             | 12378            | 7980             | 4063             | 216              | 2287             | 4889              | 135               | 36264            | 10777            | 945              | 1090              | 1650             | 8670             | 3212              | 5495              | 18                | 3821              | 0      | 310               | 277   |
| Caucasus and Central Asia | 2008             | 69654            | 34107            | 1989             | 12251            | 8005             | 4169             | 201              | 2324             | 5039              | 129               | 35547            | 10332            | 948              | 1102              | 1512             | 8673             | 3259              | 5283              | 0                 | 3864              | 0      | 289               | 284   |
| Caucasus and Central Asia | 2009             | 69100            | 34154            | 1975             | 12105            | 7997             | 4253             | 187              | 2351             | 5164              | 123               | 34946            | 9149             | 1006             | 1157              | 1122             | 9102             | 3455              | 5331              | 0                 | 4085              | 0      | 247               | 293   |
| Caucasus and Central Asia | 2010             | 68480            | 34063            | 1952             | 11937            | 7944             | 4325             | 173              | 2363             | 5251              | 117               | 34417            | 8820             | 1014             | 1169              | 1034             | 9131             | 3477              | 5144              | 1                 | 4120              | 0      | 209               | 298   |
| Caucasus and Central Asia | 2011             | 67736            | 33981            | 1931             | 11794            | 7891             | 4383             | 162              | 2375             | 5334              | 112               | 33755            | 8599             | 1010             | 1163              | 986              | 9038             | 3444              | 4909              | 8                 | 4117              | 0      | 177               | 304   |
| Caucasus and Central Asia | 2012             | 66950            | 33832            | 1906             | 11646            | 7825             | 4418             | 152              | 2382             | 5396              | 108               | 33118            | 8272             | 1009             | 1163              | 920              | 9002             | 3453              | 4712              | 0                 | 4136              | 0      | 147               | 303   |
| Caucasus and Central Asia | 2013             | 65793            | 33404            | 1868             | 11414            | 7697             | 4402             | 141              | 2369             | 5409              | 103               | 32389            | 8076             | 997              | 1149              | 884              | 8863             | 3420              | 4472              | 1                 | 4105              | 0      | 126               | 295   |
| Caucasus and Central Asia | 2014             | 63999            | 32588            | 1810             | 11075            | 7480             | 4318             | 131              | 2322             | 5355              | 97                | 31411            | 7779             | 984              | 1134              | 839              | 8725             | 3386              | 4099              | 1                 | 4070              | 0      | 109               | 285   |
| Caucasus and Central Asia | 2015             | 61500            | 31432            | 1736             | 10644            | 7186             | 4178             | 121              | 2246             | 5232              | 90                | 30068            | 7461             | 947              | 1092              | 801              | 8378             | 3277              | 3798              | 1                 | 3937              | 0      | 104               | 271   |
| Armenia                   | 2000             | 1087             | 561              | 66               | 252              | 73               | 48               | 0                | 28               | 95                | 0                 | 526              | 152              | 7                | 8                 | 24               | 108              | 89                | 41                | 1                 | 93                | 0      | 2                 | 3     |
| Armenia                   | 2001             | 1054             | 548              | 63               | 243              | 70               | 46               | 0                | 29               | 97                | 0                 | 506              | 142              | 7                | 9                 | 22               | 104              | 89                | 35                | 1                 | 91                | 0      | 3                 | 3     |
| Armenia                   | 2002             | 1054             | 556              | 61               | 244              | 70               | 48               | 0                | 31               | 102               | 0                 | 498              | 135              | 7                | 9                 | 22               | 104              | 91                | 31                | 1                 | 91                | 0      | 4                 | 3     |
| Armenia                   | 2003             | 1069             | 570              | 59               | 248              | 71               | 50               | 0                | 33               | 109               | 0                 | 499              | 130              | 8                | 9                 | 21               | 106              | 95                | 29                | 1                 | 93                | 0      | 4                 | 4     |
| Armenia                   | 2004             | 1080             | 578              | 57               | 249              | 71               | 51               | 0                | 35               | 115               | 0                 | 502              | 124              | 8                | 10                | 21               | 109              | 98                | 28                | 1                 | 94                | 0      | 5                 | 5     |
| Armenia                   | 2005             | 1073             | 578              | 54               | 247              | 71               | 50               | 0                | 37               | 119               | 0                 | 495              | 117              | 8                | 10                | 20               | 110              | 100               | 26                | 1                 | 94                | 0      | 5                 | 5     |
| Armenia                   | 2006             | 1045             | 563              | 50               | 240              | 69               | 47               | 0                | 38               | 120               | 0                 | 482              | 109              | 8                | 10                | 19               | 110              | 101               | 24                | 1                 | 92                | 0      | 4                 | 5     |
| Armenia                   | 2007             | 1001             | 532              | 45               | 225              | 64               | 43               | 0                | 37               | 117               | 0                 | 469              | 102              | 8                | 10                | 18               | 108              | 101               | 21                | 1                 | 91                | 0      | 4                 | 5     |
| Armenia                   | 2008             | 944              | 505              | 41               | 213              | 61               | 39               | 0                | 36               | 115               | 0                 | 439              | 92               | 9                | 10                | 16               | 102              | 98                | 19                | 0                 | 85                | 0      | 4                 | 5     |
| Armenia                   | 2009             | 887              | 471              | 37               | 197              | 56               | 36               | 0                | 35               | 110               | 0                 | 416              | 85               | 9                | 11                | 15               | 96               | 96                | 16                | 0                 | 80                | 0      | 4                 | 5     |
| Armenia                   | 2010             | 831              | 441              | 33               | 184              | 52               | 33               | 0                | 33               | 105               | 0                 | 390              | 73               | 11               | 13                | 16               | 95               | 92                | 13                | 0                 | 70                | 0      | 3                 | 5     |
| Armenia                   | 2011             | 779              | 413              | 30               | 171              | 49               | 31               | 0                | 32               | 101               | 0                 | 366              | 64               | 13               | 16                | 15               | 87               | 90                | 11                | 0                 | 63                | 0      | 2                 | 5     |
| Armenia                   | 2012             | 723              | 382              | 26               | 158              | 45               | 28               | 0                | 30               | 95                | 0                 | 341              | 58               | 13               | 16                | 13               | 82               | 86                | 10                | 0                 | 58                | 0      | 2                 | 4     |
| Armenia                   | 2013             | 671              | 355              | 23               | 146              | 42               | 25               | 0                | 29               | 90                | 0                 | 316              | 52               | 12               | 15                | 12               | 76               | 81                | 9                 | 0                 | 53                | 0      | 2                 | 4     |
| Armenia                   | 2014             | 620              | 324              | 20               | 133              | 38               | 23               | 0                | 27               | 84                | 0                 | 296              | 48               | 12               | 15                | 11               | 71               | 78                | 8                 | 0                 | 49                | 0      | 1                 | 3     |
| Armenia                   | 2015             | 577              | 301              | 18               | 124              | 35               | 20               | 0                | 25               | 79                | 0                 | 276              | 44               | 12               | 14                | 10               | 67               | 74                | 7                 | 0                 | 45                | 0      | 1                 | 3     |
| Azerbaijan                | 2000             | 9630             | 4176             | 246              | 1825             | 985              | 389              | 81               | 245              | 367               | 38                | 5454             | 1639             | 123              | 151               | 239              | 1265             | 330               | 1184              | 9                 | 488               | 0      | 3                 | 24    |
| Azerbaijan                | 2001             | 8618             | 3905             | 227              | 1706             | 907              | 370              | 66               | 229              | 368               | 32                | 4713             | 1422             | 108              | 132               | 202              | 1105             | 294               | 976               | 11                | 435               | 0      | 4                 | 23    |
| Azerbaijan                | 2002             | 7883             | 3712             | 214              | 1611             | 853              | 358              | 54               | 219              | 375               | 28                | 4171             | 1260             | 97               | 118               | 175              | 984              | 267               | 822               | 24                | 396               | 0      | 5                 | 23    |
| Azerbaijan                | 2003             | 7379             | 3604             | 206              | 1547             | 823              | 354              | 46               | 214              | 390               | 25                | 3775             | 1140             | 88               | 108               | 153              | 894              | 247               | 708               | 38                | 368               | 0      | 7                 | 24    |
| Azerbaijan                | 2004             | 7006             | 3531             | 201              | 1495             | 802              | 353              | 39               | 211              | 408               | 22                | 3475             | 1059             | 83               | 101               | 137              | 834              | 235               | 627               | 18                | 350               |        |                   |       |

Webappendix 6. Estimated numbers of deaths by cause in neonates, children aged 1-59 months at the global, regional and country levels in 2000-2015

| Year             | 0-28 days        |                  |                  |                  |                  |                  |                  |                  |                  |                   | 1-59 months       |                  |                  |                  |                   |                  |                  |                   |                   |                   |                   |      |                   |     |
|------------------|------------------|------------------|------------------|------------------|------------------|------------------|------------------|------------------|------------------|-------------------|-------------------|------------------|------------------|------------------|-------------------|------------------|------------------|-------------------|-------------------|-------------------|-------------------|------|-------------------|-----|
|                  | USD <sup>1</sup> | NEO <sup>2</sup> | PNE <sup>3</sup> | PRE <sup>4</sup> | INT <sup>5</sup> | SEP <sup>6</sup> | TET <sup>7</sup> | OTH <sup>8</sup> | CON <sup>9</sup> | DIA <sup>10</sup> | POS <sup>11</sup> | PNE <sup>3</sup> | PRE <sup>4</sup> | INT <sup>5</sup> | MEN <sup>12</sup> | OTH <sup>8</sup> | CON <sup>9</sup> | DIA <sup>10</sup> | MEA <sup>13</sup> | INJ <sup>14</sup> | MAL <sup>15</sup> | AIDS | PER <sup>16</sup> |     |
| Tajikistan       | 2010             | 4229             | 2306             | 129              | 743              | 539              | 291              | 8                | 159              | 433               | 5                 | 1923             | 464              | 70               | 61                | 62               | 490              | 232               | 257               | 0                 | 243               | 0    | 20                | 24  |
| Tajikistan       | 2011             | 4174             | 2257             | 125              | 710              | 526              | 288              | 7                | 157              | 439               | 5                 | 1917             | 463              | 70               | 61                | 61               | 488              | 232               | 246               | 0                 | 247               | 0    | 23                | 26  |
| Tajikistan       | 2012             | 4097             | 2217             | 122              | 682              | 514              | 286              | 6                | 155              | 447               | 4                 | 1880             | 456              | 69               | 60                | 60               | 478              | 229               | 232               | 0                 | 247               | 0    | 23                | 27  |
| Tajikistan       | 2013             | 4010             | 2169             | 119              | 656              | 501              | 282              | 6                | 153              | 449               | 4                 | 1841             | 456              | 67               | 59                | 58               | 470              | 226               | 218               | 0                 | 247               | 0    | 25                | 26  |
| Tajikistan       | 2014             | 3871             | 2099             | 114              | 626              | 482              | 274              | 5                | 149              | 444               | 4                 | 1772             | 430              | 65               | 57                | 56               | 452              | 218               | 202               | 0                 | 240               | 0    | 26                | 25  |
| Tajikistan       | 2015             | 3644             | 1985             | 107              | 587              | 453              | 260              | 5                | 141              | 428               | 4                 | 1659             | 404              | 61               | 53                | 52               | 424              | 206               | 182               | 0                 | 228               | 0    | 24                | 24  |
| Tajikistan       | 2000             | 17821            | 5756             | 385              | 2178             | 1505             | 710              | 96               | 396              | 416               | 69                | 12065            | 3647             | 280              | 277               | 800              | 2708             | 576               | 2695              | 5                 | 989               | 0    | 52                | 35  |
| Tajikistan       | 2001             | 16323            | 5482             | 365              | 2052             | 1433             | 684              | 83               | 379              | 427               | 60                | 10841            | 3301             | 255              | 252               | 712              | 2464             | 528               | 2312              | 4                 | 922               | 0    | 56                | 34  |
| Tajikistan       | 2002             | 14801            | 5199             | 343              | 1917             | 1360             | 657              | 71               | 362              | 437               | 51                | 9602             | 2943             | 229              | 226               | 623              | 2207             | 480               | 1954              | 3                 | 848               | 0    | 57                | 32  |
| Tajikistan       | 2003             | 13412            | 4911             | 322              | 1780             | 1286             | 628              | 61               | 344              | 447               | 42                | 8501             | 2622             | 205              | 202               | 543              | 1975             | 431               | 1651              | 5                 | 778               | 0    | 58                | 32  |
| Tajikistan       | 2004             | 12341            | 4659             | 303              | 1657             | 1223             | 603              | 52               | 329              | 456               | 36                | 7682             | 2382             | 187              | 184               | 482              | 1803             | 397               | 1426              | 3                 | 726               | 0    | 58                | 31  |
| Tajikistan       | 2005             | 11663            | 4562             | 295              | 1590             | 1202             | 593              | 46               | 327              | 477               | 32                | 7101             | 2215             | 175              | 172               | 439              | 1682             | 373               | 1264              | 0                 | 691               | 0    | 57                | 32  |
| Tajikistan       | 2006             | 11291            | 4589             | 296              | 1568             | 1214             | 596              | 43               | 333              | 510               | 29                | 6702             | 2102             | 167              | 163               | 409              | 1602             | 356               | 1146              | 0                 | 670               | 0    | 55                | 33  |
| Tajikistan       | 2007             | 11235            | 4726             | 303              | 1585             | 1255             | 612              | 41               | 350              | 552               | 28                | 6509             | 2052             | 163              | 159               | 393              | 1567             | 347               | 1073              | 0                 | 665               | 0    | 54                | 36  |
| Tajikistan       | 2008             | 11367            | 4909             | 314              | 1620             | 1301             | 644              | 39               | 368              | 595               | 28                | 6458             | 1887             | 171              | 168               | 323              | 1654             | 367               | 1084              | 0                 | 710               | 0    | 53                | 39  |
| Tajikistan       | 2009             | 11604            | 5075             | 323              | 1653             | 1337             | 681              | 37               | 384              | 632               | 27                | 6529             | 1748             | 184              | 180               | 254              | 1786             | 392               | 1121              | 0                 | 771               | 0    | 53                | 40  |
| Tajikistan       | 2010             | 11822            | 5237             | 330              | 1688             | 1365             | 731              | 35               | 396              | 665               | 27                | 6585             | 1772             | 186              | 182               | 255              | 1815             | 396               | 1096              | 0                 | 790               | 0    | 50                | 43  |
| Tajikistan       | 2011             | 11985            | 5366             | 336              | 1712             | 1385             | 768              | 33               | 407              | 697               | 26                | 6619             | 1777             | 188              | 185               | 250              | 1846             | 401               | 1070              | 0                 | 810               | 0    | 47                | 44  |
| Tajikistan       | 2012             | 12110            | 5471             | 340              | 1730             | 1401             | 799              | 32               | 417              | 727               | 25                | 6639             | 1797             | 189              | 186               | 253              | 1859             | 403               | 1037              | 0                 | 822               | 0    | 49                | 46  |
| Tajikistan       | 2013             | 12154            | 5558             | 343              | 1744             | 1415             | 819              | 30               | 426              | 755               | 25                | 6596             | 1785             | 189              | 186               | 247              | 1867             | 402               | 1000              | 0                 | 830               | 0    | 46                | 46  |
| Tajikistan       | 2014             | 12055            | 5552             | 341              | 1733             | 1405             | 822              | 28               | 427              | 771               | 24                | 6503             | 1762             | 187              | 184               | 241              | 1856             | 398               | 956               | 0                 | 831               | 0    | 43                | 45  |
| Tajikistan       | 2015             | 11799            | 5494             | 335              | 1710             | 1381             | 814              | 27               | 423              | 781               | 23                | 6305             | 1714             | 182              | 179               | 234              | 1811             | 387               | 897               | 0                 | 816               | 0    | 41                | 44  |
| Turkmenistan     | 2000             | 7679             | 2736             | 168              | 1094             | 677              | 302              | 35               | 177              | 262               | 21                | 4943             | 1455             | 114              | 139               | 214              | 1191             | 325               | 1073              | 0                 | 417               | 0    | 0                 | 15  |
| Turkmenistan     | 2001             | 7582             | 2809             | 172              | 1114             | 695              | 316              | 34               | 184              | 275               | 20                | 4773             | 1411             | 112              | 137               | 205              | 1156             | 325               | 1003              | 0                 | 409               | 0    | 0                 | 15  |
| Turkmenistan     | 2002             | 7796             | 2983             | 182              | 1170             | 739              | 342              | 34               | 197              | 299               | 20                | 4813             | 1428             | 115              | 140               | 206              | 1170             | 342               | 977               | 0                 | 419               | 0    | 0                 | 16  |
| Turkmenistan     | 2003             | 8141             | 3186             | 193              | 1237             | 790              | 373              | 34               | 212              | 327               | 20                | 4955             | 1476             | 120              | 147               | 211              | 1208             | 363               | 973               | 0                 | 438               | 0    | 0                 | 19  |
| Turkmenistan     | 2004             | 8370             | 3338             | 202              | 1281             | 828              | 398              | 33               | 225              | 352               | 20                | 5032             | 1504             | 124              | 151               | 212              | 1231             | 384               | 954               | 0                 | 452               | 0    | 0                 | 20  |
| Turkmenistan     | 2005             | 8359             | 3395             | 204              | 1289             | 842              | 413              | 31               | 231              | 366               | 19                | 4964             | 1488             | 124              | 152               | 205              | 1219             | 395               | 909               | 0                 | 452               | 0    | 0                 | 20  |
| Turkmenistan     | 2006             | 8102             | 3302             | 197              | 1242             | 818              | 409              | 28               | 227              | 364               | 18                | 4800             | 1444             | 122              | 149               | 194              | 1182             | 395               | 850               | 0                 | 444               | 0    | 0                 | 20  |
| Turkmenistan     | 2007             | 7631             | 3108             | 184              | 1159             | 768              | 391              | 25               | 215              | 350               | 16                | 4523             | 1366             | 116              | 142               | 179              | 1118             | 382               | 775               | 0                 | 424               | 0    | 0                 | 20  |
| Turkmenistan     | 2008             | 7042             | 2875             | 169              | 1063             | 709              | 368              | 21               | 201              | 331               | 14                | 4167             | 1262             | 109              | 133               | 161              | 1033             | 364               | 689               | 0                 | 397               | 0    | 0                 | 19  |
| Turkmenistan     | 2009             | 6519             | 2689             | 157              | 985              | 661              | 349              | 19               | 190              | 316               | 12                | 3830             | 1165             | 101              | 123               | 145              | 955              | 340               | 613               | 0                 | 370               | 0    | 0                 | 17  |
| Turkmenistan     | 2010             | 6178             | 2553             | 148              | 928              | 626              | 335              | 17               | 182              | 306               | 11                | 3625             | 992              | 102              | 125               | 106              | 964              | 347               | 596               | 0                 | 377               | 0    | 0                 | 16  |
| Turkmenistan     | 2011             | 5984             | 2513             | 145              | 905              | 614              | 334              | 15               | 181              | 307               | 10                | 3471             | 928              | 100              | 122               | 93               | 938              | 342               | 559               | 0                 | 372               | 0    | 0                 | 17  |
| Turkmenistan     | 2012             | 5943             | 2532             | 146              | 904              | 618              | 340              | 15               | 185              | 316               | 10                | 3411             | 865              | 102              | 124               | 77               | 949              | 352               | 546               | 0                 | 380               | 0    | 0                 | 17  |
| Turkmenistan     | 2013             | 5954             | 2567             | 147              | 909              | 624              | 347              | 14               | 189              | 327               | 10                | 3387             | 861              | 102              | 125               | 75               | 945              | 357               | 524               | 0                 | 382               | 0    | 0                 | 17  |
| Turkmenistan     | 2014             | 5960             | 2600             | 148              | 915              | 630              | 354              | 13               | 192              | 338               | 9                 | 3360             | 856              | 102              | 125               | 73               | 940              | 361               | 502               | 0                 | 384               | 0    | 0                 | 17  |
| Turkmenistan     | 2015             | 5868             | 2581             | 146              | 904              | 623              | 352              | 13               | 191              | 343               | 9                 | 3287             | 839              | 101              | 123               | 71               | 922              | 360               | 475               | 0                 | 380               | 0    | 0                 | 16  |
| Uzbekistan       | 2000             | 34947            | 15707            | 946              | 6161             | 3793             | 1686             | 178              | 996              | 1855              | 92                | 19240            | 5604             | 454              | 555               | 1004             | 4567             | 1367              | 3751              | 5                 | 1769              | 0    | 71                | 93  |
| Uzbekistan       | 2001             | 33393            | 15236            | 910              | 5956             | 3657             | 1666             | 161              | 971              | 1830              | 85                | 18157            | 5298             | 435              | 531               | 942              | 4319             | 1340              | 3416              | 2                 | 1689              | 0    | 94                | 90  |
| Uzbekistan       | 2002             | 31943            | 14743            | 874              | 5720             | 3528             | 1646             | 145              | 947              | 1805              | 78                | 17200            | 5023             | 418              | 511               | 884              | 4095             | 1319              | 3121              | 2                 | 1618              | 0    | 120               | 89  |
| Uzbekistan       | 2003             | 30701            | 14398            | 850              | 5524             | 3448             | 1634             | 132              | 935              | 1803              | 72                | 16303            | 4772             | 400              | 489               | 829              | 3887             | 1279              | 2856              | 2                 | 1554              | 0    | 145               | 91  |
| Uzbekistan       | 2004             | 29807            | 14060            | 826              | 5324             | 3373             | 1623             | 119              | 925              | 1803              | 67                | 15747            | 4615             | 392              | 479               | 789              | 3759             | 1276              | 2660              | 2                 | 1519              | 0    | 166               | 91  |
| Uzbekistan       | 2005             | 29320            | 14028            | 821              | 5237             | 3372             | 1646             | 110              | 935              | 1844              | 63                | 15292            | 4483             | 385              | 471               | 751              | 3648             | 1281              | 2488              | 14                | 1492              | 0    | 185               | 94  |
| Uzbekistan       | 2006             | 29268            | 14192            | 827              | 5228             | 3410             | 1701             | 103              | 957              | 1905              | 60                | 15076            | 4430             | 384              | 469               | 727              | 3600             | 1294              | 2368              | 16                | 1490              | 0    | 198               | 100 |
| Uzbekistan       | 2007             | 29506            | 14562            | 844              | 5299             | 3493             | 1781             | 99               | 992              | 1996              | 59                | 14944            | 4407             | 385              | 471               | 706              | 3579             | 1318              | 2269              | 17                | 1498              | 0    | 191               | 103 |
| Uzbekistan       | 2008             | 29887            | 14917            | 858              | 5370             | 3569             | 1859             | 94               | 1026             | 2083              | 57                | 14970            | 4437             | 391              | 478               | 696              | 3602             | 1361              | 2201              | 0                 | 1523              | 0    | 174               | 106 |
| Uzbekistan       | 2009             | 30127            | 15189            | 869              | 5416             | 3620             | 1926             | 89               | 1054             | 2161              | 55                | 14938            | 3675             | 438              | 536               | 428              | 4006             | 1549              | 2353              | 0                 | 1707              | 0    | 136               | 110 |
| Uzbekistan       | 2010             | 30123            | 15292            | 869              | 5408             | 3628             | 1968             | 84               | 1069             | 2213              | 53                | 14831            | 3659             | 440              | 538               | 417              | 4002             | 1567              | 2266              | 1                 | 1722              | 0    | 107               | 111 |
| Uzbekistan       | 2011             | 29809            | 15249            | 860              | 5353             | 3601             | 1990             | 78               | 1074             | 2244              | 50                | 14560            | 3606             | 436              | 533               | 406              | 3944             | 1567              | 2154              | 8                 | 1715              | 0    | 78                | 112 |
| Uzbekistan       | 2012             | 29248            | 15067            | 844              | 5254             | 3542             | 1986             | 72               | 1069             | 2253              | 47                | 14181            | 3529             | 430              | 526               | 392              | 3861             | 1563              | 2033              | 0                 | 1695              | 0    | 44                | 110 |
| Uzbekistan       | 2013             | 28418            | 14681            | 817              | 5087             | 3435             | 1952             | 66               | 1048             | 2232              | 44                | 13737            | 3427             | 421              | 514               | 376              | 3752             | 1548              | 1940              | 0                 | 1662              | 0    | 27                | 107 |
| Uzbekistan       | 2014             | 27362            | 14178            | 784              | 4890             | 3300             | 1893             | 60               | 1016             | 2194              | 40                | 13184            | 3329             | 412              | 503               | 363              | 3649             | 1533              | 1640              | 0                 | 1632              | 0    | 21                | 102 |
| Uzbekistan       | 2015             | 26205            | 13652            | 750              | 4694             | 3161             | 1827             | 55               | 980              | 2147              | 37                | 12553            | 3171             | 395              | 483               | 344              | 3477             | 1489              | 1508              | 0                 | 1569              | 0    | 20                | 97  |
| Developed region | 2000             | 129276           | 70889            | 2959             | 29393            | 8246             | 4473             | 3                | 6910             | 18903             | 0                 | 58387            | 8715             | 2755             | 845               | 2161             | 15692            | 14629             | 1935              | 34                | 10690             | 2    | 691               | 238 |
| Developed region | 2001             | 125705           | 69391            | 2762             | 28900            | 7947             | 4236             | 4                | 7085             | 18456             | 0                 | 56314            | 8143             | 2735             | 850               | 1955             | 15145            | 14238             | 1758              | 25                | 10443             | 0    | 783               | 240 |
| Developed region | 2002             | 121724           | 67875            | 2553             | 28015            | 7796             | 4099             | 4                | 7060             | 18348             | 0                 | 53849            | 7398             | 2711             | 899               | 1777             | 14917            | 13568             | 1591              | 24                | 9866              | 0    | 858               | 241 |
| Developed region | 2003             | 117598           | 66164            | 2294             | 27758            | 7                |                  |                  |                  |                   |                   |                  |                  |                  |                   |                  |                  |                   |                   |                   |                   |      |                   |     |



Webappendix 6. Estimated numbers of deaths by cause in neonates, children aged 1-59 months at the global, regional and country levels in 2000-2015

| Year                   | 0-28 days        |                  |                  |                  |                  |                  |                  |                  |                  |                   |                   | 1-59 months      |                  |                  |                   |                  |                  |                   |                   |                   |                   |      |                   |    |
|------------------------|------------------|------------------|------------------|------------------|------------------|------------------|------------------|------------------|------------------|-------------------|-------------------|------------------|------------------|------------------|-------------------|------------------|------------------|-------------------|-------------------|-------------------|-------------------|------|-------------------|----|
|                        | USD <sup>1</sup> | NEO <sup>2</sup> | PNE <sup>3</sup> | PRE <sup>4</sup> | INT <sup>5</sup> | SEP <sup>6</sup> | TET <sup>7</sup> | OTH <sup>8</sup> | CON <sup>9</sup> | DIA <sup>10</sup> | POS <sup>11</sup> | PNE <sup>3</sup> | PRE <sup>4</sup> | INT <sup>5</sup> | MEN <sup>12</sup> | OTH <sup>8</sup> | CON <sup>9</sup> | DIA <sup>10</sup> | MEA <sup>13</sup> | INJ <sup>14</sup> | MAL <sup>15</sup> | AIDS | PER <sup>16</sup> |    |
| Austria                | 2005             | 1458             | 843              | 2                | 291              | 122              | 29               | 0                | 149              | 250               | 0                 | 615              | 40               | 37               | 11                | 18               | 239              | 141               | 4                 | 0                 | 125               | 0    | 0                 | 1  |
|                        | 2006             | 1482             | 850              | 3                | 322              | 119              | 23               | 0                | 148              | 235               | 0                 | 632              | 43               | 21               | 14                | 18               | 278              | 112               | 10                | 0                 | 133               | 0    | 0                 | 1  |
|                        | 2007             | 1494             | 865              | 4                | 262              | 142              | 27               | 0                | 149              | 281               | 0                 | 629              | 46               | 26               | 8                 | 11               | 267              | 142               | 1                 | 0                 | 129               | 0    | 0                 | 0  |
|                        | 2008             | 1508             | 879              | 3                | 244              | 135              | 26               | 0                | 183              | 288               | 0                 | 629              | 32               | 22               | 17                | 13               | 282              | 142               | 0                 | 0                 | 118               | 0    | 1                 | 1  |
|                        | 2009             | 1504             | 883              | 1                | 246              | 152              | 13               | 0                | 205              | 265               | 0                 | 621              | 41               | 31               | 7                 | 7                | 248              | 159               | 9                 | 0                 | 119               | 0    | 0                 | 0  |
|                        | 2010             | 1478             | 871              | 0                | 259              | 136              | 23               | 0                | 178              | 276               | 0                 | 607              | 42               | 34               | 11                | 16               | 243              | 150               | 2                 | 0                 | 105               | 3    | 0                 | 2  |
|                        | 2011             | 1396             | 811              | 3                | 250              | 148              | 21               | 0                | 157              | 232               | 0                 | 585              | 30               | 56               | 10                | 10               | 235              | 143               | 2                 | 0                 | 97                | 0    | 0                 | 2  |
|                        | 2012             | 1323             | 770              | 1                | 226              | 131              | 17               | 0                | 162              | 232               | 0                 | 553              | 34               | 37               | 9                 | 10               | 221              | 138               | 4                 | 0                 | 98                | 1    | 0                 | 1  |
|                        | 2013             | 1243             | 725              | 1                | 213              | 123              | 16               | 0                | 153              | 219               | 0                 | 518              | 32               | 34               | 8                 | 10               | 207              | 129               | 4                 | 0                 | 92                | 1    | 0                 | 1  |
|                        | 2014             | 1171             | 685              | 1                | 201              | 116              | 15               | 0                | 144              | 207               | 0                 | 486              | 30               | 32               | 8                 | 9                | 195              | 121               | 3                 | 0                 | 86                | 1    | 0                 | 1  |
|                        | 2015             | 1146             | 657              | 1                | 193              | 112              | 15               | 0                | 138              | 198               | 0                 | 489              | 30               | 33               | 8                 | 9                | 196              | 122               | 3                 | 0                 | 86                | 1    | 0                 | 1  |
|                        | 2000             | 412              | 225              | 3                | 86               | 22               | 5                | 0                | 25               | 84                | 0                 | 187              | 5                | 5                | 5                 | 6                | 56               | 73                | 1                 | 0                 | 36                | 0    | 0                 | 0  |
|                        | 2001             | 397              | 222              | 1                | 91               | 21               | 1                | 0                | 34               | 73                | 0                 | 175              | 9                | 13               | 8                 | 7                | 51               | 63                | 0                 | 0                 | 25                | 0    | 0                 | 0  |
|                        | 2002             | 395              | 220              | 0                | 146              | 7                | 2                | 0                | 6                | 58                | 0                 | 175              | 11               | 29               | 0                 | 4                | 48               | 56                | 0                 | 0                 | 27                | 0    | 0                 | 0  |
|                        | 2003             | 400              | 229              | 0                | 150              | 13               | 1                | 0                | 13               | 51                | 0                 | 171              | 4                | 25               | 1                 | 7                | 32               | 62                | 3                 | 0                 | 37                | 0    | 0                 | 0  |
|                        | 2004             | 396              | 229              | 1                | 143              | 14               | 2                | 0                | 10               | 60                | 0                 | 167              | 11               | 30               | 7                 | 5                | 42               | 54                | 0                 | 0                 | 17                | 0    | 0                 | 0  |
|                        | 2005             | 395              | 226              | 0                | 140              | 15               | 0                | 0                | 6                | 65                | 0                 | 169              | 1                | 27               | 4                 | 6                | 48               | 55                | 1                 | 0                 | 26                | 0    | 0                 | 0  |
|                        | 2006             | 389              | 227              | 0                | 155              | 5                | 1                | 0                | 16               | 50                | 0                 | 162              | 4                | 27               | 3                 | 5                | 49               | 45                | 1                 | 0                 | 28                | 0    | 0                 | 0  |
|                        | 2007             | 377              | 217              | 0                | 115              | 18               | 3                | 0                | 27               | 53                | 0                 | 160              | 4                | 15               | 3                 | 1                | 59               | 51                | 3                 | 0                 | 23                | 0    | 0                 | 0  |
|                        | 2008             | 364              | 205              | 0                | 78               | 27               | 3                | 0                | 31               | 67                | 0                 | 159              | 4                | 13               | 5                 | 8                | 50               | 52                | 1                 | 0                 | 26                | 0    | 0                 | 0  |
|                        | 2009             | 351              | 202              | 0                | 70               | 14               | 12               | 0                | 41               | 65                | 0                 | 149              | 6                | 11               | 6                 | 9                | 48               | 51                | 0                 | 0                 | 19                | 0    | 0                 | 0  |
|                        | 2010             | 341              | 193              | 1                | 82               | 16               | 5                | 0                | 37               | 53                | 0                 | 148              | 5                | 18               | 4                 | 8                | 41               | 56                | 1                 | 0                 | 15                | 0    | 0                 | 0  |
|                        | 2011             | 327              | 187              | 0                | 60               | 26               | 6                | 0                | 24               | 70                | 0                 | 140              | 9                | 7                | 6                 | 4                | 52               | 48                | 2                 | 0                 | 10                | 0    | 1                 | 1  |
|                        | 2012             | 315              | 189              | 0                | 58               | 19               | 11               | 0                | 35               | 66                | 0                 | 126              | 7                | 13               | 1                 | 7                | 40               | 39                | 3                 | 0                 | 16                | 0    | 0                 | 0  |
|                        | 2013             | 312              | 184              | 0                | 66               | 12               | 0                | 0                | 35               | 70                | 0                 | 128              | 2                | 9                | 1                 | 8                | 55               | 39                | 1                 | 0                 | 11                | 0    | 1                 | 0  |
|                        | 2014             | 300              | 179              | 0                | 62               | 22               | 4                | 0                | 31               | 61                | 0                 | 121              | 5                | 8                | 3                 | 2                | 54               | 37                | 0                 | 0                 | 12                | 0    | 0                 | 0  |
|                        | 2015             | 288              | 173              | 0                | 58               | 17               | 5                | 0                | 31               | 62                | 0                 | 115              | 4                | 9                | 2                 | 5                | 46               | 35                | 1                 | 0                 | 12                | 0    | 0                 | 0  |
| Belarus                | 2000             | 1322             | 681              | 51               | 280              | 80               | 38               | 0                | 52               | 181               | 0                 | 641              | 131              | 29               | 18                | 25               | 141              | 175               | 21                | 0                 | 91                | 0    | 3                 | 8  |
|                        | 2001             | 1208             | 615              | 42               | 253              | 72               | 33               | 0                | 48               | 167               | 0                 | 593              | 115              | 28               | 17                | 22               | 131              | 168               | 18                | 0                 | 83                | 0    | 2                 | 9  |
|                        | 2002             | 1113             | 557              | 35               | 229              | 65               | 29               | 0                | 44               | 154               | 0                 | 556              | 102              | 28               | 17                | 19               | 123              | 163               | 16                | 0                 | 77                | 0    | 2                 | 9  |
|                        | 2003             | 1028             | 508              | 28               | 209              | 60               | 26               | 0                | 42               | 143               | 0                 | 520              | 90               | 27               | 16                | 17               | 115              | 157               | 13                | 0                 | 72                | 0    | 2                 | 10 |
|                        | 2004             | 972              | 457              | 24               | 188              | 53               | 24               | 0                | 37               | 131               | 0                 | 515              | 85               | 28               | 16                | 16               | 117              | 159               | 12                | 0                 | 71                | 0    | 2                 | 9  |
|                        | 2005             | 912              | 417              | 20               | 172              | 49               | 22               | 0                | 34               | 121               | 0                 | 495              | 76               | 27               | 16                | 15               | 113              | 157               | 11                | 0                 | 69                | 0    | 3                 | 9  |
|                        | 2006             | 860              | 373              | 16               | 153              | 43               | 20               | 0                | 31               | 110               | 0                 | 487              | 70               | 27               | 16                | 14               | 113              | 157               | 10                | 0                 | 69                | 0    | 2                 | 9  |
|                        | 2007             | 795              | 328              | 13               | 134              | 38               | 17               | 0                | 28               | 98                | 0                 | 467              | 61               | 27               | 15                | 13               | 109              | 153               | 8                 | 0                 | 67                | 0    | 4                 | 9  |
|                        | 2008             | 738              | 293              | 10               | 119              | 34               | 16               | 0                | 26               | 89                | 0                 | 445              | 53               | 26               | 15                | 13               | 106              | 148               | 7                 | 0                 | 64                | 0    | 2                 | 10 |
|                        | 2009             | 693              | 268              | 8                | 108              | 31               | 14               | 0                | 24               | 83                | 0                 | 425              | 47               | 27               | 16                | 12               | 101              | 144               | 6                 | 0                 | 60                | 0    | 1                 | 10 |
|                        | 2010             | 659              | 254              | 7                | 101              | 29               | 14               | 0                | 23               | 80                | 0                 | 405              | 44               | 25               | 14                | 9                | 95               | 142               | 6                 | 0                 | 59                | 0    | 1                 | 10 |
|                        | 2011             | 627              | 252              | 6                | 100              | 28               | 14               | 0                | 23               | 81                | 0                 | 375              | 37               | 26               | 15                | 10               | 88               | 132               | 5                 | 0                 | 52                | 0    | 1                 | 10 |
|                        | 2012             | 617              | 251              | 7                | 99               | 28               | 14               | 0                | 22               | 81                | 0                 | 366              | 34               | 26               | 15                | 9                | 86               | 131               | 4                 | 0                 | 50                | 0    | 1                 | 9  |
|                        | 2013             | 604              | 248              | 7                | 97               | 27               | 14               | 0                | 22               | 81                | 0                 | 356              | 32               | 26               | 15                | 8                | 84               | 129               | 4                 | 0                 | 48                | 0    | 1                 | 9  |
|                        | 2014             | 579              | 240              | 6                | 93               | 26               | 13               | 0                | 22               | 79                | 0                 | 339              | 30               | 26               | 15                | 8                | 79               | 125               | 4                 | 0                 | 44                | 0    | 1                 | 8  |
|                        | 2015             | 567              | 239              | 6                | 92               | 26               | 14               | 0                | 22               | 79                | 0                 | 328              | 28               | 25               | 14                | 7                | 77               | 121               | 3                 | 0                 | 43                | 0    | 1                 | 8  |
| Belgium                | 2000             | 637              | 325              | 2                | 86               | 51               | 14               | 0                | 55               | 118               | 0                 | 312              | 6                | 23               | 6                 | 26               | 108              | 78                | 4                 | 0                 | 59                | 0    | 0                 | 1  |
|                        | 2001             | 615              | 316              | 4                | 95               | 43               | 17               | 0                | 51               | 105               | 0                 | 299              | 5                | 12               | 5                 | 32               | 94               | 70                | 3                 | 0                 | 77                | 0    | 0                 | 0  |
|                        | 2002             | 603              | 311              | 1                | 85               | 39               | 12               | 0                | 63               | 112               | 0                 | 292              | 18               | 15               | 5                 | 22               | 111              | 65                | 1                 | 0                 | 54                | 0    | 0                 | 0  |
|                        | 2003             | 595              | 321              | 2                | 92               | 44               | 15               | 0                | 54               | 114               | 0                 | 274              | 10               | 14               | 6                 | 22               | 105              | 59                | 6                 | 0                 | 52                | 0    | 0                 | 0  |
|                        | 2004             | 600              | 319              | 3                | 89               | 38               | 16               | 0                | 55               | 117               | 0                 | 281              | 6                | 13               | 7                 | 28               | 89               | 77                | 9                 | 0                 | 51                | 0    | 0                 | 2  |
|                        | 2005             | 604              | 317              | 0                | 95               | 47               | 24               | 0                | 58               | 93                | 0                 | 287              | 18               | 19               | 2                 | 22               | 110              | 57                | 6                 | 0                 | 53                | 0    | 0                 | 0  |
|                        | 2006             | 606              | 325              | 1                | 90               | 46               | 19               | 0                | 74               | 95                | 0                 | 281              | 7                | 11               | 0                 | 25               | 113              | 72                | 4                 | 0                 | 48                | 0    | 0                 | 0  |
|                        | 2007             | 607              | 319              | 2                | 87               | 45               | 17               | 0                | 68               | 100               | 0                 | 288              | 17               | 20               | 3                 | 22               | 99               | 71                | 2                 | 0                 | 55                | 0    | 0                 | 0  |
|                        | 2008             | 605              | 312              | 0                | 85               | 43               | 16               | 0                | 73               | 95                | 0                 | 293              | 9                | 26               | 3                 | 16               | 102              | 79                | 3                 | 0                 | 55                | 0    | 0                 | 0  |
|                        | 2009             | 599              | 316              | 0                | 99               | 48               | 15               | 0                | 58               | 96                | 0                 | 283              | 14               | 17               | 0                 | 15               | 105              | 69                | 2                 | 0                 | 60                | 0    | 0                 | 1  |
|                        | 2010             | 590              | 304              | 1                | 80               | 51               | 13               | 0                | 65               | 94                | 0                 | 286              | 14               | 10               | 1                 | 7                | 127              | 75                | 0                 | 0                 | 50                | 0    | 0                 | 1  |
|                        | 2011             | 578              | 303              | 1                | 83               | 61               | 10               | 0                | 58               | 90                | 0                 | 275              | 10               | 15               | 2                 | 9                | 112              | 65                | 2                 | 0                 | 58                | 0    | 0                 | 3  |
|                        | 2012             | 561              | 300              | 2                | 73               | 39               | 11               | 0                | 59               | 116               | 0                 | 261              | 1                | 17               | 2                 | 13               | 100              | 67                | 0                 | 0                 | 59                | 0    | 0                 | 1  |
|                        | 2013             | 556              | 283              | 1                | 74               | 47               | 11               | 0                | 57               | 94                | 0                 | 273              | 8                | 14               | 2                 | 10               | 112              | 69                | 1                 | 0                 | 56                | 0    | 0                 | 2  |
|                        | 2014             | 537              | 279              | 1                | 73               | 46               | 11               | 0                | 56               | 92                | 0                 | 258              | 8                | 13               | 2                 | 9                | 106              | 65                | 0                 | 0                 | 53                | 0    | 0                 | 2  |
|                        | 2015             | 522              | 278              | 1                | 72               | 46               | 11               | 0                | 56               | 92                | 0                 | 244              | 7                | 13               | 2                 | 9                | 100              | 62                | 0                 | 0                 | 50                | 0    | 0                 | 2  |
| Bosnia and Herzegovina | 2000             | 438              | 321              | 17               | 128              | 40               | 20               | 0                | 27               | 89                | 0                 | 117              | 17               | 5                | 3                 | 3                | 27               | 39                | 4                 | 4                 | 12                | 0    | 0                 | 3  |
|                        | 2001             | 380              | 272              | 14               | 108              | 34               | 17               | 0                | 23               | 76                | 0                 | 108              | 15               | 5                | 3                 | 3                | 25               | 37                | 3                 | 3                 | 11                | 0    | 0                 | 3  |
|                        | 2002             | 321              | 219              | 11               | 87               | 27               | 14               | 0                | 18               | 62                | 0                 | 102              | 14               | 5                | 3                 | 3                | 24               | 35                | 3                 | 2                 | 10                | 0    | 0                 | 3  |
|                        | 2003             | 266              | 170              | 8                | 67               | 21               | 11               | 0                | 14               | 48                | 0                 | 96               | 13               | 5                | 3                 | 2                | 24               | 33                | 3                 | 1                 | 10                | 0    | 0                 | 3  |
|                        | 2004             | 225              | 135              | 7                | 54               | 17               | 8                | 0                | 11               | 39                | 0                 | 90               | 11               | 5                | 3                 | 3                | 21               | 31                | 2                 | 1                 | 9                 | 0    | 0                 | 3  |
|                        | 2005             | 208              | 120              | 6                | 48               | 15               | 7                | 0                | 10               | 34                | 0                 | 88               | 11               | 5                | 3                 | 3                | 21               | 30                | 2                 | 1                 | 9                 | 0    | 0                 | 3  |
|                        | 2006             | 213              | 127              | 6                | 51               | 16               | 8                | 0                | 10               | 36                | 0                 | 86               | 10               | 6                | 3                 | 3                | 21               | 30                | 2                 | 1                 | 9                 | 0    | 0                 | 2  |
|                        | 2007             | 249              | 150              | 7                | 60               | 18               | 9                | 0                | 12               | 43                | 0                 | 99               | 11               | 6                | 3                 | 3                | 24               | 33                | 2                 | 5                 | 9                 | 0    | 0                 | 2  |
|                        | 2008             | 281              | 180              | 8                | 72               | 22               | 11               | 0                | 14               | 52                | 0                 | 101              | 11               | 7                | 4                 | 3                | 26               | 35                | 2                 | 2                 | 10                | 0    | 0                 | 2  |
|                        | 2009             | 306</            |                  |                  |                  |                  |                  |                  |                  |                   |                   |                  |                  |                  |                   |                  |                  |                   |                   |                   |                   |      |                   |    |

Webappendix 6. Estimated numbers of deaths by cause in neonates, children aged 1-59 months at the global, regional and country levels in 2000-2015

| Country        | Year | 0-28 days        |                  |                  |                  |                  |                  |                  |                  |                  |                   |                   | 1-59 months      |                  |                  |                   |                  |                  |                   |                   |                   |                   |      |                   |
|----------------|------|------------------|------------------|------------------|------------------|------------------|------------------|------------------|------------------|------------------|-------------------|-------------------|------------------|------------------|------------------|-------------------|------------------|------------------|-------------------|-------------------|-------------------|-------------------|------|-------------------|
|                |      | USD <sup>1</sup> | NEO <sup>2</sup> | PNE <sup>3</sup> | PRE <sup>4</sup> | INT <sup>5</sup> | SEP <sup>6</sup> | TET <sup>7</sup> | OTH <sup>8</sup> | CON <sup>9</sup> | DIA <sup>10</sup> | POS <sup>11</sup> | PNE <sup>3</sup> | PRE <sup>4</sup> | INT <sup>5</sup> | MEN <sup>12</sup> | OTH <sup>8</sup> | CON <sup>9</sup> | DIA <sup>10</sup> | MEA <sup>13</sup> | INJ <sup>14</sup> | MAL <sup>15</sup> | AIDS | PER <sup>16</sup> |
| Croatia        | 2000 | 437              | 294              | 13               | 127              | 27               | 22               | 0                | 18               | 86               | 0                 | 143               | 11               | 10               | 3                | 6                 | 31               | 46               | 1                 | 0                 | 35                | 0                 | 0    | 0                 |
|                | 2001 | 403              | 268              | 7                | 127              | 22               | 11               | 0                | 22               | 80               | 0                 | 135               | 7                | 13               | 2                | 7                 | 25               | 57               | 2                 | 0                 | 22                | 0                 | 0    | 0                 |
|                | 2002 | 355              | 228              | 1                | 106              | 33               | 13               | 0                | 13               | 62               | 0                 | 127               | 4                | 14               | 6                | 6                 | 36               | 48               | 1                 | 0                 | 11                | 0                 | 0    | 1                 |
|                | 2003 | 304              | 189              | 6                | 88               | 12               | 23               | 0                | 12               | 49               | 0                 | 115               | 6                | 12               | 4                | 3                 | 30               | 40               | 1                 | 0                 | 19                | 0                 | 0    | 0                 |
|                | 2004 | 263              | 161              | 8                | 67               | 13               | 16               | 0                | 12               | 45               | 0                 | 102               | 1                | 8                | 1                | 1                 | 27               | 38               | 0                 | 0                 | 24                | 0                 | 0    | 1                 |
|                | 2005 | 240              | 143              | 7                | 37               | 18               | 12               | 0                | 18               | 51               | 0                 | 97                | 8                | 3                | 1                | 8                 | 23               | 40               | 0                 | 0                 | 13                | 0                 | 0    | 0                 |
|                | 2006 | 234              | 141              | 4                | 47               | 16               | 11               | 0                | 16               | 47               | 0                 | 93                | 5                | 10               | 0                | 1                 | 20               | 40               | 1                 | 0                 | 15                | 0                 | 0    | 0                 |
|                | 2007 | 242              | 152              | 6                | 38               | 13               | 22               | 0                | 25               | 47               | 0                 | 90                | 7                | 7                | 4                | 0                 | 24               | 28               | 2                 | 0                 | 19                | 0                 | 0    | 0                 |
|                | 2008 | 255              | 166              | 6                | 54               | 8                | 18               | 0                | 31               | 49               | 0                 | 89                | 5                | 11               | 0                | 4                 | 25               | 26               | 4                 | 0                 | 11                | 0                 | 0    | 2                 |
|                | 2009 | 263              | 177              | 2                | 52               | 13               | 10               | 0                | 32               | 67               | 0                 | 86                | 4                | 7                | 0                | 5                 | 26               | 30               | 0                 | 0                 | 13                | 0                 | 0    | 0                 |
|                | 2010 | 263              | 174              | 4                | 39               | 10               | 18               | 0                | 58               | 45               | 0                 | 89                | 4                | 4                | 3                | 6                 | 29               | 36               | 0                 | 0                 | 7                 | 0                 | 0    | 1                 |
|                | 2011 | 248              | 163              | 2                | 39               | 16               | 10               | 0                | 54               | 42               | 0                 | 85                | 0                | 6                | 5                | 5                 | 38               | 24               | 0                 | 0                 | 7                 | 0                 | 0    | 0                 |
|                | 2012 | 229              | 145              | 3                | 39               | 16               | 9                | 0                | 40               | 39               | 0                 | 84                | 2                | 6                | 1                | 8                 | 29               | 29               | 0                 | 0                 | 9                 | 0                 | 0    | 0                 |
|                | 2013 | 205              | 126              | 4                | 23               | 9                | 6                | 0                | 57               | 28               | 0                 | 79                | 6                | 0                | 4                | 3                 | 33               | 24               | 0                 | 0                 | 9                 | 0                 | 0    | 0                 |
|                | 2014 | 182              | 108              | 2                | 25               | 10               | 6                | 0                | 38               | 27               | 0                 | 74                | 2                | 4                | 3                | 5                 | 30               | 23               | 0                 | 0                 | 8                 | 0                 | 0    | 0                 |
| 2015           | 165  | 98               | 2                | 22               | 9                | 6                | 0                | 35               | 24               | 0                | 67                | 2                 | 3                | 3                | 4                | 27                | 21               | 0                | 0                 | 7                 | 0                 | 0                 | 0    |                   |
| Cyprus         | 2000 | 84               | 40               | 1                | 16               | 5                | 2                | 0                | 5                | 12               | 0                 | 44                | 4                | 2                | 2                | 1                 | 13               | 14               | 0                 | 0                 | 6                 | 0                 | 0    | 1                 |
|                | 2001 | 75               | 36               | 1                | 14               | 4                | 2                | 0                | 4                | 11               | 0                 | 39                | 3                | 2                | 2                | 1                 | 11               | 13               | 0                 | 0                 | 6                 | 0                 | 0    | 1                 |
|                | 2002 | 70               | 33               | 0                | 13               | 4                | 2                | 0                | 4                | 10               | 0                 | 37                | 3                | 2                | 2                | 1                 | 11               | 12               | 0                 | 0                 | 5                 | 0                 | 0    | 1                 |
|                | 2003 | 65               | 30               | 0                | 12               | 4                | 2                | 0                | 3                | 9                | 0                 | 35                | 3                | 2                | 2                | 1                 | 10               | 12               | 0                 | 0                 | 5                 | 0                 | 0    | 1                 |
|                | 2004 | 61               | 29               | 0                | 11               | 3                | 2                | 0                | 3                | 9                | 0                 | 32                | 2                | 2                | 2                | 1                 | 9                | 11               | 0                 | 0                 | 4                 | 0                 | 0    | 1                 |
|                | 2005 | 57               | 28               | 0                | 11               | 3                | 2                | 0                | 3                | 9                | 0                 | 29                | 2                | 2                | 1                | 1                 | 8                | 10               | 0                 | 0                 | 4                 | 0                 | 0    | 1                 |
|                | 2006 | 56               | 28               | 0                | 11               | 3                | 2                | 0                | 3                | 9                | 0                 | 28                | 2                | 2                | 2                | 1                 | 8                | 10               | 0                 | 0                 | 4                 | 0                 | 0    | 1                 |
|                | 2007 | 53               | 27               | 0                | 10               | 3                | 2                | 0                | 3                | 9                | 0                 | 26                | 1                | 3                | 1                | 1                 | 7                | 9                | 0                 | 0                 | 3                 | 0                 | 0    | 1                 |
|                | 2008 | 52               | 27               | 0                | 10               | 3                | 2                | 0                | 3                | 9                | 0                 | 25                | 1                | 2                | 1                | 1                 | 7                | 9                | 0                 | 0                 | 3                 | 0                 | 0    | 1                 |
|                | 2009 | 49               | 26               | 0                | 10               | 3                | 2                | 0                | 3                | 9                | 0                 | 23                | 1                | 2                | 1                | 0                 | 6                | 8                | 0                 | 0                 | 3                 | 0                 | 0    | 1                 |
|                | 2010 | 47               | 25               | 0                | 9                | 3                | 1                | 0                | 3                | 8                | 0                 | 22                | 1                | 1                | 2                | 0                 | 6                | 8                | 0                 | 0                 | 3                 | 0                 | 0    | 1                 |
|                | 2011 | 45               | 24               | 0                | 9                | 3                | 1                | 0                | 3                | 8                | 0                 | 21                | 1                | 2                | 1                | 0                 | 6                | 8                | 0                 | 0                 | 2                 | 0                 | 0    | 1                 |
|                | 2012 | 43               | 23               | 0                | 9                | 2                | 1                | 0                | 3                | 8                | 0                 | 20                | 1                | 2                | 1                | 0                 | 5                | 7                | 0                 | 0                 | 2                 | 0                 | 0    | 1                 |
|                | 2013 | 40               | 21               | 0                | 8                | 2                | 1                | 0                | 2                | 7                | 0                 | 19                | 1                | 2                | 1                | 0                 | 5                | 7                | 0                 | 0                 | 2                 | 0                 | 0    | 1                 |
|                | 2014 | 38               | 20               | 0                | 7                | 2                | 1                | 0                | 2                | 7                | 0                 | 18                | 1                | 2                | 1                | 0                 | 5                | 7                | 0                 | 0                 | 2                 | 0                 | 0    | 0                 |
| 2015           | 35   | 19               | 0                | 7                | 2                | 1                | 0                | 2                | 6                | 0                | 16                | 1                 | 2                | 1                | 0                | 4                 | 6                | 0                | 0                 | 2                 | 0                 | 0                 | 0    |                   |
| Czech Republic | 2000 | 491              | 276              | 4                | 92               | 53               | 13               | 0                | 57               | 58               | 0                 | 215               | 17               | 13               | 8                | 8                 | 74               | 41               | 1                 | 0                 | 53                | 0                 | 0    | 0                 |
|                | 2001 | 472              | 275              | 5                | 79               | 40               | 5                | 0                | 66               | 79               | 0                 | 197               | 20               | 18               | 4                | 9                 | 65               | 54               | 0                 | 0                 | 28                | 0                 | 0    | 0                 |
|                | 2002 | 495              | 288              | 2                | 96               | 45               | 8                | 0                | 62               | 75               | 0                 | 207               | 20               | 25               | 6                | 5                 | 70               | 43               | 1                 | 0                 | 38                | 0                 | 0    | 0                 |
|                | 2003 | 521              | 316              | 13               | 82               | 47               | 10               | 0                | 79               | 85               | 0                 | 205               | 19               | 16               | 11               | 5                 | 65               | 54               | 2                 | 0                 | 33                | 0                 | 0    | 0                 |
|                | 2004 | 553              | 341              | 2                | 120              | 53               | 19               | 0                | 91               | 56               | 0                 | 212               | 12               | 24               | 5                | 12                | 77               | 41               | 4                 | 0                 | 37                | 0                 | 0    | 0                 |
|                | 2005 | 564              | 347              | 7                | 132              | 50               | 32               | 0                | 46               | 80               | 0                 | 217               | 17               | 24               | 10               | 7                 | 55               | 58               | 0                 | 0                 | 44                | 0                 | 0    | 0                 |
|                | 2006 | 571              | 352              | 9                | 104              | 70               | 19               | 0                | 79               | 70               | 0                 | 219               | 24               | 8                | 6                | 3                 | 85               | 47               | 0                 | 0                 | 46                | 0                 | 0    | 0                 |
|                | 2007 | 555              | 339              | 5                | 120              | 73               | 20               | 0                | 23               | 100              | 0                 | 216               | 21               | 20               | 9                | 13                | 61               | 36               | 6                 | 0                 | 50                | 0                 | 0    | 0                 |
|                | 2008 | 541              | 332              | 11               | 126              | 71               | 37               | 0                | 24               | 63               | 0                 | 209               | 18               | 35               | 9                | 5                 | 41               | 65               | 4                 | 0                 | 33                | 0                 | 0    | 0                 |
|                | 2009 | 517              | 306              | 7                | 101              | 67               | 55               | 0                | 16               | 60               | 0                 | 211               | 14               | 31               | 8                | 12                | 54               | 54               | 6                 | 0                 | 29                | 0                 | 0    | 1                 |
|                | 2010 | 486              | 288              | 11               | 95               | 68               | 32               | 0                | 30               | 52               | 0                 | 198               | 26               | 14               | 13               | 4                 | 56               | 52               | 1                 | 0                 | 33                | 0                 | 0    | 0                 |
|                | 2011 | 451              | 266              | 4                | 91               | 40               | 32               | 0                | 32               | 66               | 0                 | 185               | 17               | 19               | 8                | 7                 | 59               | 38               | 3                 | 0                 | 33                | 0                 | 0    | 0                 |
|                | 2012 | 419              | 229              | 1                | 89               | 45               | 11               | 0                | 19               | 64               | 0                 | 190               | 19               | 31               | 6                | 4                 | 57               | 40               | 6                 | 0                 | 27                | 0                 | 0    | 0                 |
|                | 2013 | 386              | 204              | 4                | 81               | 34               | 21               | 0                | 21               | 43               | 0                 | 182               | 24               | 25               | 3                | 5                 | 59               | 36               | 3                 | 0                 | 27                | 0                 | 0    | 0                 |
|                | 2014 | 347              | 183              | 3                | 69               | 31               | 17               | 0                | 19               | 45               | 0                 | 164               | 18               | 22               | 5                | 5                 | 52               | 34               | 3                 | 0                 | 26                | 0                 | 0    | 0                 |
| 2015           | 328  | 168              | 2                | 63               | 28               | 15               | 0                | 17               | 42               | 0                | 160               | 17                | 22               | 5                | 5                | 50                | 33               | 3                | 0                 | 25                | 0                 | 0                 | 0    |                   |
| Denmark        | 2000 | 359              | 221              | 1                | 98               | 26               | 4                | 0                | 22               | 70               | 0                 | 138               | 7                | 8                | 3                | 6                 | 43               | 50               | 2                 | 0                 | 18                | 0                 | 0    | 0                 |
|                | 2001 | 350              | 213              | 2                | 90               | 29               | 5                | 0                | 24               | 62               | 0                 | 137               | 8                | 9                | 3                | 8                 | 52               | 41               | 4                 | 0                 | 12                | 0                 | 0    | 0                 |
|                | 2002 | 343              | 207              | 1                | 93               | 20               | 5                | 0                | 19               | 70               | 0                 | 136               | 9                | 6                | 8                | 6                 | 44               | 42               | 1                 | 0                 | 19                | 0                 | 0    | 0                 |
|                | 2003 | 338              | 203              | 0                | 94               | 25               | 1                | 0                | 20               | 62               | 0                 | 135               | 10               | 7                | 1                | 6                 | 36               | 55               | 0                 | 0                 | 19                | 0                 | 0    | 1                 |
|                | 2004 | 329              | 199              | 2                | 108              | 20               | 3                | 0                | 17               | 49               | 0                 | 130               | 4                | 12               | 6                | 7                 | 31               | 50               | 2                 | 0                 | 18                | 0                 | 0    | 0                 |
|                | 2005 | 319              | 201              | 0                | 94               | 27               | 5                | 0                | 18               | 57               | 0                 | 118               | 7                | 12               | 4                | 3                 | 35               | 35               | 0                 | 0                 | 22                | 0                 | 0    | 1                 |
|                | 2006 | 309              | 198              | 1                | 97               | 24               | 6                | 0                | 15               | 54               | 0                 | 111               | 3                | 8                | 4                | 1                 | 39               | 42               | 1                 | 0                 | 12                | 0                 | 0    | 0                 |
|                | 2007 | 300              | 194              | 1                | 83               | 26               | 6                | 0                | 27               | 50               | 0                 | 106               | 1                | 14               | 1                | 3                 | 38               | 35               | 1                 | 0                 | 12                | 0                 | 0    | 0                 |
|                | 2008 | 289              | 196              | 0                | 100              | 28               | 4                | 0                | 21               | 42               | 0                 | 93                | 2                | 7                | 0                | 2                 | 31               | 36               | 3                 | 0                 | 12                | 0                 | 0    | 0                 |
|                | 2009 | 282              | 189              | 0                | 112              | 15               | 2                | 0                | 31               | 29               | 0                 | 93                | 7                | 10               | 0                | 2                 | 39               | 25               | 2                 | 0                 | 9                 | 0                 | 0    | 0                 |
|                | 2010 | 265              | 186              | 0                | 95               | 22               | 4                | 0                | 26               | 39               | 0                 | 79                | 3                | 8                | 0                | 2                 | 29               | 26               | 2                 | 0                 | 9                 | 0                 | 0    | 0                 |
|                | 2011 | 250              | 172              | 0                | 88               | 20               | 4                | 0                | 24               | 36               | 0                 | 78                | 3                | 8                | 0                | 2                 | 29               | 26               | 2                 | 0                 | 9                 | 0                 | 0    | 0                 |
|                | 2012 | 231              | 162              | 0                | 82               | 19               | 4                | 0                | 22               | 34               | 0                 | 69                | 2                | 7                | 0                | 2                 | 26               | 23               | 1                 | 0                 | 8                 | 0                 | 0    | 0                 |
|                | 2013 | 211              | 145              | 0                | 74               | 17               | 3                | 0                | 20               | 30               | 0                 | 66                | 2                | 7                | 0                | 2                 | 24               | 22               | 1                 | 0                 | 7                 | 0                 | 0    | 0                 |
|                | 2014 | 196              | 137              | 0                | 70               | 16               | 3                | 0                | 19               | 29               | 0                 | 59                | 2                | 6                | 0                | 1                 | 22               | 19               | 1                 | 0                 | 7                 | 0                 | 0    | 0                 |
| 2015           | 187  | 129              | 0                | 66               | 15               | 3                | 0                | 18               | 27               | 0                | 58                | 2                 | 6                | 0                | 1                | 22                | 19               | 1                | 0                 | 6                 | 0                 | 0                 | 0    |                   |
| Estonia        | 2000 | 135              | 77               | 5                | 25               | 6                | 15               | 0                | 8                | 18               | 0                 | 58                | 5                | 0                | 0                | 1                 | 7                | 19               | 2                 | 0                 | 24                | 0                 | 0    | 0                 |
|                | 2001 | 131              | 74               | 4                | 22               | 8                | 17               | 0                | 4                | 19               | 0                 | 57                | 2                | 1                | 0                | 2                 | 18               | 17               | 1                 | 0                 | 16                | 0                 | 0    | 0                 |
|                | 2002 | 126              | 73               | 2                | 19               | 16               | 11               | 0                | 3                | 23               | 0                 | 53                | 6                | 0                | 0                | 2                 | 11               | 16               | 0                 | 0                 | 18                | 0                 | 0    | 0                 |
|                | 2003 | 120              | 69               | 1                | 19               | 18               | 8                | 0                | 4                | 19               | 0                 | 51                | 3                | 1                | 0                | 1                 | 10               | 16               | 1                 | 0                 | 18                | 0                 | 0    | 0                 |
|                | 2004 | 114              | 66               | 0                | 28               | 13               | 5                | 0                | 3                | 17               | 0                 | 48                | 5                | 6                | 0                | 1                 | 11               | 14               | 0                 | 0                 | 10                | 0                 | 1    | 0                 |
|                | 2005 | 110              | 62               | 0                | 13               | 19               | 4                | 0                | 4                | 22               | 0                 | 48                | 4                | 0                | 0                | 2                 | 16               | 10               | 0                 | 0                 | 16                | 0                 | 0    | 0                 |
|                | 2006 | 104              | 59               | 2                | 25               | 5                | 3                | 0                | 3                | 22               | 0                 | 45                | 0                | 1                | 1                | 1                 | 10               | 16               | 0                 | 0                 | 15                | 0                 | 0    | 0                 |
|                | 2007 | 98               | 56               | 0                | 20               | 6                | 9                | 0                | 6                | 14               | 0                 | 42                | 2                | 5                | 0                | 1                 | 10               | 15               | 0                 | 0                 | 7                 | 0                 | 0    | 1                 |
|                | 2008 | 90               | 52               | 1                | 12               | 7                | 5                | 0                | 7                |                  |                   |                   |                  |                  |                  |                   |                  |                  |                   |                   |                   |                   |      |                   |

Webappendix 6. Estimated numbers of deaths by cause in neonates, children aged 1-59 months at the global, regional and country levels in 2000-2015

| Year    | 0-28 days        |                  |                  |                  |                  |                  |                  |                  |                  |                   |                   | 1-59 months      |                  |                  |                   |                  |                  |                   |                   |                   |                   |      |                   |   |
|---------|------------------|------------------|------------------|------------------|------------------|------------------|------------------|------------------|------------------|-------------------|-------------------|------------------|------------------|------------------|-------------------|------------------|------------------|-------------------|-------------------|-------------------|-------------------|------|-------------------|---|
|         | USD <sup>1</sup> | NEO <sup>2</sup> | PNE <sup>3</sup> | PRE <sup>4</sup> | INT <sup>5</sup> | SEP <sup>6</sup> | TET <sup>7</sup> | OTH <sup>8</sup> | CON <sup>9</sup> | DIA <sup>10</sup> | POS <sup>11</sup> | PNE <sup>3</sup> | PRE <sup>4</sup> | INT <sup>5</sup> | MEN <sup>12</sup> | OTH <sup>8</sup> | CON <sup>9</sup> | DIA <sup>10</sup> | MEA <sup>13</sup> | INJ <sup>14</sup> | MAL <sup>15</sup> | AIDS | PER <sup>16</sup> |   |
| Germany | 2011             | 3379             | 1726             | 2                | 503              | 289              | 115              | 0                | 371              | 447               | 0                 | 1653             | 56               | 117              | 56                | 51               | 650              | 434               | 40                | 0                 | 247               | 0    | 0                 | 2 |
| Germany | 2012             | 3383             | 1728             | 4                | 484              | 293              | 105              | 0                | 360              | 481               | 0                 | 1655             | 56               | 111              | 48                | 51               | 676              | 427               | 41                | 0                 | 240               | 0    | 2                 | 1 |
| Germany | 2013             | 3463             | 1807             | 4                | 507              | 306              | 110              | 0                | 377              | 503               | 0                 | 1656             | 56               | 112              | 48                | 51               | 677              | 427               | 41                | 0                 | 240               | 0    | 2                 | 1 |
| Germany | 2014             | 3462             | 1807             | 4                | 507              | 306              | 110              | 0                | 377              | 503               | 0                 | 1655             | 56               | 111              | 48                | 51               | 676              | 427               | 41                | 0                 | 240               | 0    | 2                 | 1 |
| Germany | 2015             | 3378             | 1726             | 4                | 484              | 293              | 105              | 0                | 360              | 480               | 0                 | 1652             | 56               | 111              | 48                | 51               | 675              | 426               | 41                | 0                 | 239               | 0    | 2                 | 1 |
| Greece  | 2000             | 4375             | 2292             | 7                | 1061             | 164              | 78               | 0                | 215              | 767               | 0                 | 2083             | 67               | 206              | 62                | 74               | 677              | 696               | 15                | 2                 | 279               | 0    | 5                 | 0 |
| Greece  | 2001             | 4158             | 2166             | 8                | 1008             | 174              | 82               | 0                | 229              | 664               | 0                 | 1992             | 99               | 193              | 51                | 52               | 656              | 663               | 11                | 2                 | 264               | 0    | 2                 | 0 |
| Greece  | 2002             | 3936             | 2078             | 7                | 1022             | 145              | 75               | 0                | 197              | 631               | 0                 | 1858             | 84               | 209              | 53                | 75               | 604              | 604               | 14                | 0                 | 264               | 0    | 2                 | 0 |
| Greece  | 2003             | 3673             | 1966             | 8                | 936              | 174              | 53               | 0                | 188              | 608               | 0                 | 1707             | 84               | 160              | 50                | 67               | 528              | 572               | 14                | 0                 | 230               | 0    | 2                 | 0 |
| Greece  | 2004             | 3426             | 1792             | 6                | 906              | 121              | 62               | 0                | 173              | 523               | 0                 | 1634             | 78               | 178              | 48                | 67               | 517              | 523               | 11                | 0                 | 210               | 0    | 0                 | 1 |
| Greece  | 2005             | 3161             | 1718             | 10               | 876              | 118              | 60               | 0                | 155              | 500               | 0                 | 1443             | 58               | 140              | 34                | 49               | 514              | 469               | 3                 | 0                 | 177               | 0    | 0                 | 0 |
| Greece  | 2006             | 3022             | 1681             | 4                | 841              | 148              | 51               | 0                | 201              | 436               | 0                 | 1341             | 48               | 117              | 44                | 61               | 445              | 442               | 10                | 0                 | 170               | 0    | 3                 | 0 |
| Greece  | 2007             | 2930             | 1606             | 7                | 821              | 123              | 51               | 0                | 158              | 446               | 0                 | 1324             | 55               | 149              | 40                | 38               | 470              | 408               | 9                 | 0                 | 154               | 0    | 1                 | 0 |
| Greece  | 2008             | 2872             | 1550             | 8                | 750              | 126              | 56               | 0                | 175              | 435               | 0                 | 1322             | 61               | 136              | 30                | 32               | 487              | 415               | 12                | 0                 | 149               | 0    | 0                 | 0 |
| Greece  | 2009             | 2827             | 1568             | 2                | 734              | 121              | 53               | 0                | 167              | 490               | 0                 | 1259             | 61               | 120              | 29                | 22               | 433              | 422               | 10                | 0                 | 163               | 0    | 0                 | 0 |
| Greece  | 2010             | 2784             | 1519             | 7                | 645              | 136              | 51               | 0                | 219              | 461               | 0                 | 1265             | 34               | 154              | 25                | 22               | 415              | 444               | 13                | 0                 | 157               | 0    | 0                 | 0 |
| Greece  | 2011             | 2734             | 1532             | 7                | 656              | 156              | 59               | 0                | 199              | 456               | 0                 | 1202             | 52               | 130              | 34                | 19               | 421              | 403               | 9                 | 0                 | 130               | 0    | 1                 | 3 |
| Greece  | 2012             | 2687             | 1546             | 7                | 655              | 158              | 63               | 0                | 216              | 447               | 0                 | 1141             | 38               | 128              | 37                | 23               | 386              | 393               | 11                | 0                 | 126               | 0    | 0                 | 0 |
| Greece  | 2013             | 2641             | 1493             | 7                | 583              | 144              | 50               | 0                | 234              | 476               | 0                 | 1148             | 40               | 98               | 19                | 21               | 498              | 341               | 12                | 0                 | 118               | 0    | 0                 | 0 |
| Greece  | 2014             | 2594             | 1506             | 7                | 624              | 151              | 56               | 0                | 214              | 454               | 0                 | 1088             | 40               | 111              | 28                | 20               | 407              | 354               | 10                | 0                 | 117               | 0    | 0                 | 1 |
| Greece  | 2015             | 2545             | 1449             | 7                | 600              | 145              | 54               | 0                | 206              | 437               | 0                 | 1096             | 41               | 112              | 28                | 20               | 410              | 357               | 10                | 0                 | 117               | 0    | 0                 | 1 |
| Hungary | 2000             | 813              | 583              | 4                | 337              | 56               | 13               | 0                | 10               | 162               | 0                 | 230              | 19               | 0                | 0                 | 9                | 40               | 124               | 0                 | 0                 | 38                | 0    | 0                 | 0 |
| Hungary | 2001             | 761              | 530              | 4                | 261              | 84               | 10               | 0                | 1                | 168               | 0                 | 221              | 17               | 0                | 1                 | 5                | 27               | 136               | 0                 | 0                 | 42                | 0    | 1                 | 1 |
| Hungary | 2002             | 710              | 490              | 3                | 284              | 53               | 10               | 0                | 4                | 137               | 0                 | 230              | 13               | 0                | 0                 | 1                | 43               | 119               | 0                 | 0                 | 44                | 0    | 0                 | 0 |
| Hungary | 2003             | 661              | 451              | 6                | 248              | 72               | 3                | 0                | 11               | 110               | 0                 | 210              | 19               | 1                | 0                 | 5                | 34               | 118               | 0                 | 0                 | 32                | 0    | 0                 | 0 |
| Hungary | 2004             | 624              | 412              | 2                | 245              | 41               | 8                | 0                | 11               | 107               | 0                 | 212              | 22               | 0                | 0                 | 4                | 48               | 115               | 0                 | 0                 | 23                | 0    | 0                 | 0 |
| Hungary | 2005             | 588              | 385              | 7                | 225              | 38               | 0                | 0                | 8                | 106               | 0                 | 203              | 26               | 0                | 0                 | 2                | 53               | 98                | 0                 | 0                 | 24                | 0    | 0                 | 0 |
| Hungary | 2006             | 564              | 370              | 0                | 217              | 36               | 3                | 0                | 7                | 108               | 0                 | 194              | 30               | 0                | 0                 | 3                | 30               | 103               | 0                 | 0                 | 27                | 0    | 0                 | 0 |
| Hungary | 2007             | 552              | 354              | 0                | 219              | 24               | 1                | 0                | 7                | 103               | 0                 | 198              | 27               | 0                | 0                 | 2                | 29               | 111               | 0                 | 0                 | 29                | 0    | 0                 | 0 |
| Hungary | 2008             | 538              | 349              | 3                | 228              | 28               | 0                | 0                | 12               | 78                | 0                 | 189              | 29               | 0                | 0                 | 4                | 25               | 100               | 0                 | 0                 | 31                | 0    | 0                 | 0 |
| Hungary | 2009             | 545              | 353              | 3                | 233              | 15               | 3                | 0                | 10               | 89                | 0                 | 192              | 17               | 0                | 0                 | 5                | 32               | 110               | 0                 | 0                 | 28                | 0    | 0                 | 0 |
| Hungary | 2010             | 536              | 343              | 2                | 180              | 36               | 6                | 0                | 12               | 106               | 0                 | 193              | 14               | 0                | 0                 | 1                | 30               | 126               | 0                 | 0                 | 22                | 0    | 0                 | 0 |
| Hungary | 2011             | 537              | 344              | 0                | 176              | 32               | 1                | 0                | 13               | 121               | 0                 | 193              | 14               | 0                | 0                 | 2                | 45               | 112               | 0                 | 0                 | 20                | 0    | 0                 | 0 |
| Hungary | 2012             | 536              | 343              | 0                | 201              | 20               | 2                | 0                | 7                | 113               | 0                 | 193              | 21               | 0                | 0                 | 1                | 34               | 119               | 0                 | 0                 | 17                | 0    | 0                 | 0 |
| Hungary | 2013             | 529              | 339              | 1                | 184              | 29               | 3                | 0                | 11               | 112               | 0                 | 190              | 16               | 0                | 0                 | 1                | 36               | 117               | 0                 | 0                 | 19                | 0    | 0                 | 0 |
| Hungary | 2014             | 507              | 331              | 1                | 179              | 28               | 3                | 0                | 11               | 109               | 0                 | 176              | 15               | 0                | 0                 | 1                | 33               | 109               | 0                 | 0                 | 18                | 0    | 0                 | 0 |
| Hungary | 2015             | 489              | 307              | 1                | 166              | 26               | 3                | 0                | 10               | 101               | 0                 | 182              | 15               | 0                | 0                 | 1                | 34               | 112               | 0                 | 0                 | 19                | 0    | 0                 | 0 |
| Iceland | 2000             | 988              | 601              | 16               | 387              | 30               | 4                | 0                | 45               | 118               | 0                 | 387              | 54               | 54               | 17                | 11               | 86               | 114               | 1                 | 0                 | 50                | 0    | 0                 | 0 |
| Iceland | 2001             | 928              | 574              | 6                | 373              | 33               | 14               | 0                | 28               | 122               | 0                 | 354              | 37               | 76               | 9                 | 18               | 66               | 110               | 2                 | 0                 | 37                | 0    | 0                 | 0 |
| Iceland | 2002             | 891              | 552              | 9                | 356              | 35               | 11               | 0                | 33               | 108               | 0                 | 339              | 33               | 48               | 5                 | 11               | 99               | 98                | 4                 | 0                 | 51                | 0    | 0                 | 0 |
| Iceland | 2003             | 875              | 543              | 11               | 366              | 35               | 7                | 0                | 20               | 104               | 0                 | 332              | 38               | 60               | 8                 | 8                | 85               | 94                | 1                 | 0                 | 38                | 0    | 0                 | 0 |
| Iceland | 2004             | 861              | 529              | 8                | 348              | 46               | 8                | 0                | 29               | 91                | 0                 | 332              | 31               | 62               | 8                 | 16               | 95               | 83                | 2                 | 0                 | 34                | 0    | 0                 | 0 |
| Iceland | 2005             | 845              | 515              | 17               | 314              | 33               | 8                | 0                | 23               | 120               | 0                 | 330              | 37               | 42               | 8                 | 18               | 91               | 97                | 2                 | 0                 | 35                | 0    | 0                 | 0 |
| Iceland | 2006             | 815              | 500              | 14               | 279              | 31               | 5                | 0                | 35               | 136               | 0                 | 315              | 24               | 41               | 8                 | 13               | 93               | 91                | 1                 | 0                 | 44                | 0    | 0                 | 0 |
| Iceland | 2007             | 774              | 479              | 15               | 293              | 28               | 6                | 0                | 21               | 115               | 0                 | 295              | 35               | 34               | 13                | 10               | 82               | 86                | 1                 | 0                 | 34                | 0    | 0                 | 0 |
| Iceland | 2008             | 735              | 452              | 11               | 267              | 30               | 24               | 0                | 25               | 95                | 0                 | 283              | 19               | 47               | 12                | 10               | 82               | 83                | 4                 | 0                 | 26                | 0    | 0                 | 0 |
| Iceland | 2009             | 683              | 423              | 13               | 247              | 29               | 19               | 0                | 21               | 95                | 0                 | 260              | 19               | 43               | 6                 | 9                | 67               | 95                | 1                 | 0                 | 20                | 0    | 0                 | 0 |
| Iceland | 2010             | 650              | 393              | 5                | 250              | 15               | 11               | 0                | 16               | 95                | 0                 | 257              | 20               | 46               | 4                 | 8                | 67               | 90                | 0                 | 0                 | 22                | 0    | 0                 | 0 |
| Iceland | 2011             | 616              | 374              | 7                | 198              | 35               | 15               | 0                | 21               | 98                | 0                 | 242              | 25               | 37               | 3                 | 7                | 70               | 75                | 3                 | 0                 | 20                | 0    | 0                 | 0 |
| Iceland | 2012             | 590              | 353              | 7                | 199              | 33               | 12               | 0                | 21               | 81                | 0                 | 237              | 24               | 31               | 13                | 4                | 71               | 62                | 6                 | 0                 | 26                | 0    | 0                 | 0 |
| Iceland | 2013             | 564              | 333              | 6                | 197              | 35               | 12               | 0                | 15               | 68                | 0                 | 231              | 19               | 33               | 8                 | 12               | 81               | 58                | 2                 | 0                 | 18                | 0    | 0                 | 0 |
| Iceland | 2014             | 543              | 316              | 6                | 177              | 31               | 12               | 0                | 17               | 73                | 0                 | 227              | 22               | 32               | 8                 | 8                | 71               | 62                | 4                 | 0                 | 21                | 0    | 0                 | 0 |
| Iceland | 2015             | 518              | 304              | 6                | 171              | 29               | 11               | 0                | 16               | 70                | 0                 | 214              | 21               | 31               | 7                 | 7                | 67               | 59                | 3                 | 0                 | 20                | 0    | 0                 | 0 |
| Ireland | 2000             | 16               | 8                | 0                | 5                | 2                | 0                | 0                | 1                | 0                 | 0                 | 8                | 0                | 0                | 0                 | 0                | 4                | 3                 | 0                 | 0                 | 1                 | 0    | 0                 | 0 |
| Ireland | 2001             | 15               | 8                | 0                | 4                | 1                | 0                | 0                | 1                | 2                 | 0                 | 7                | 0                | 0                | 0                 | 0                | 4                | 2                 | 0                 | 0                 | 1                 | 0    | 0                 | 0 |
| Ireland | 2002             | 14               | 7                | 0                | 3                | 1                | 0                | 0                | 1                | 2                 | 0                 | 7                | 0                | 0                | 1                 | 1                | 4                | 1                 | 0                 | 0                 | 1                 | 0    | 0                 | 0 |
| Ireland | 2003             | 14               | 7                | 0                | 2                | 1                | 0                | 0                | 1                | 3                 | 0                 | 7                | 0                | 0                | 1                 | 1                | 4                | 0                 | 0                 | 0                 | 0                 | 0    | 0                 | 0 |
| Ireland | 2004             | 14               | 7                | 0                | 2                | 1                | 0                | 0                | 1                | 3                 | 0                 | 7                | 0                | 0                | 1                 | 1                | 5                | 0                 | 0                 | 0                 | 0                 | 0    | 0                 | 0 |
| Ireland | 2005             | 13               | 7                | 0                | 1                | 1                | 0                | 0                | 1                | 3                 | 0                 | 6                | 0                | 0                | 0                 | 0                | 5                | 0                 | 0                 | 0                 | 0                 | 0    | 0                 | 0 |
| Ireland | 2006             | 13               | 6                | 0                | 1                | 1                | 1                | 0                | 1                | 1                 | 0                 | 7                | 0                | 0                | 0                 | 0                | 5                | 1                 | 0                 | 0                 | 0                 | 0    | 0                 | 0 |
| Ireland | 2007             | 13               | 6                | 0                | 2                | 1                | 1                | 0                | 1                | 1                 | 0                 | 7                | 0                | 0                | 0                 | 0                | 6                | 1                 | 0                 | 0                 | 0                 | 0    | 0                 | 0 |
| Ireland | 2008             | 13               | 6                | 0                | 3                | 1                | 1                | 0                | 1                | 1                 | 0                 | 7                | 0                | 1                | 0                 | 0                | 5                | 1                 | 0                 | 0                 | 0                 | 0    | 0                 | 0 |
| Ireland | 2009             | 12               | 6                | 0                | 4                | 0                | 1                | 0                | 1                | 0                 | 0                 | 6                | 0                | 1                | 0                 | 0                | 4                | 1                 | 0                 | 0                 | 0                 | 0    | 0                 | 0 |
| Ireland | 2010             | 12               | 6                | 0                | 3                | 0                | 1                | 0                | 1                | 0                 | 0                 | 6                | 0                | 1                | 0                 | 0                | 4                | 1                 | 0                 | 0                 | 0                 | 0    | 0                 | 0 |
| Ireland | 2011             | 11               | 5                | 0                | 3                | 1                | 1                | 0                | 1                | 0                 | 0                 | 6                | 0                | 1                | 0                 | 0                | 4                | 1                 | 0                 | 0                 | 0                 | 0    | 0                 | 0 |
| Ireland | 2012             | 11               | 5                | 0                | 3                | 1                | 1                | 0                | 1                | 0                 | 0                 | 6                | 0                | 1                | 0                 | 0                | 4                | 1                 | 0                 | 0                 | 0                 | 0    | 0                 | 0 |
| Ireland | 2013             | 10               | 5                | 0                | 3                | 1                | 1                | 0                | 1                | 0                 | 0                 | 5                | 0                | 0                | 0                 | 0                | 3                | 1                 | 0                 | 0                 | 0                 | 0    | 0                 | 0 |
| Ireland | 2014             | 10               | 4                | 0                | 2                | 0                | 1                | 0                | 0                | 0                 | 0                 | 6                | 0                |                  |                   |                  |                  |                   |                   |                   |                   |      |                   |   |

Webappendix 6. Estimated numbers of deaths by cause in neonates, children aged 1-59 months at the global, regional and country levels in 2000-2015

| Year | USD <sup>1</sup> | 0-28 days        |                  |                  |                  |                  |                  |                  |                  |                   |                   | 1-59 months      |                  |                  |                   |                  |                  |                   |                   |                   |                   |      |                   |
|------|------------------|------------------|------------------|------------------|------------------|------------------|------------------|------------------|------------------|-------------------|-------------------|------------------|------------------|------------------|-------------------|------------------|------------------|-------------------|-------------------|-------------------|-------------------|------|-------------------|
|      |                  | NEO <sup>2</sup> | PNE <sup>3</sup> | PRE <sup>4</sup> | INT <sup>5</sup> | SEP <sup>6</sup> | TET <sup>7</sup> | OTH <sup>8</sup> | CON <sup>9</sup> | DIA <sup>10</sup> | POS <sup>11</sup> | PNE <sup>3</sup> | PRE <sup>4</sup> | INT <sup>5</sup> | MEN <sup>12</sup> | OTH <sup>8</sup> | CON <sup>9</sup> | DIA <sup>10</sup> | MEA <sup>13</sup> | INJ <sup>14</sup> | MAL <sup>15</sup> | AIDS | PER <sup>16</sup> |
| 2006 | 2460             | 1493             | 7                | 592              | 157              | 80               | 0                | 245              | 412              | 0                 | 967               | 28               | 83               | 24               | 25                | 371              | 342              | 3                 | 0                 | 92                | 0                 | 0    | 0                 |
| 2007 | 2413             | 1441             | 8                | 566              | 171              | 60               | 0                | 290              | 347              | 0                 | 972               | 22               | 86               | 26               | 21                | 394              | 320              | 3                 | 0                 | 100               | 0                 | 0    | 0                 |
| 2008 | 2348             | 1435             | 3                | 534              | 167              | 61               | 0                | 285              | 385              | 0                 | 913               | 29               | 90               | 26               | 14                | 371              | 294              | 0                 | 0                 | 88                | 0                 | 1    | 0                 |
| 2009 | 2325             | 1418             | 3                | 546              | 167              | 89               | 0                | 280              | 333              | 0                 | 907               | 17               | 79               | 35               | 20                | 392              | 265              | 0                 | 0                 | 95                | 0                 | 3    | 0                 |
| 2010 | 2229             | 1335             | 4                | 542              | 157              | 80               | 0                | 247              | 304              | 0                 | 894               | 23               | 78               | 31               | 16                | 397              | 266              | 4                 | 0                 | 78                | 0                 | 0    | 0                 |
| 2011 | 2124             | 1299             | 6                | 488              | 128              | 60               | 0                | 265              | 352              | 0                 | 825               | 31               | 79               | 22               | 10                | 351              | 254              | 8                 | 0                 | 71                | 0                 | 0    | 0                 |
| 2012 | 2004             | 1200             | 1                | 451              | 125              | 80               | 0                | 260              | 283              | 0                 | 804               | 26               | 60               | 21               | 12                | 384              | 243              | 3                 | 0                 | 56                | 0                 | 0    | 0                 |
| 2013 | 1882             | 1103             | 3                | 425              | 118              | 63               | 0                | 222              | 271              | 0                 | 779               | 25               | 67               | 23               | 12                | 350              | 236              | 4                 | 0                 | 63                | 0                 | 0    | 0                 |
| 2014 | 1776             | 1018             | 3                | 392              | 109              | 59               | 0                | 205              | 250              | 0                 | 758               | 24               | 65               | 22               | 11                | 340              | 229              | 4                 | 0                 | 61                | 0                 | 0    | 0                 |
| 2015 | 1693             | 998              | 3                | 385              | 107              | 57               | 0                | 201              | 245              | 0                 | 695               | 22               | 60               | 20               | 10                | 312              | 210              | 4                 | 0                 | 56                | 0                 | 0    | 0                 |
| 2000 | 5316             | 2130             | 27               | 470              | 259              | 122              | 0                | 244              | 1008             | 0                 | 3186              | 331              | 90               | 23               | 59                | 898              | 1118             | 33                | 11                | 621               | 0                 | 0    | 1                 |
| 2001 | 5037             | 1987             | 31               | 460              | 223              | 106              | 0                | 232              | 936              | 0                 | 3050              | 261              | 76               | 42               | 53                | 813              | 1110             | 57                | 7                 | 632               | 0                 | 0    | 0                 |
| 2002 | 4735             | 1952             | 31               | 405              | 201              | 95               | 0                | 190              | 1029             | 0                 | 2783              | 285              | 83               | 41               | 41                | 766              | 982              | 44                | 6                 | 536               | 0                 | 0    | 0                 |
| 2003 | 4542             | 1799             | 26               | 415              | 198              | 113              | 0                | 212              | 834              | 0                 | 2743              | 288              | 74               | 44               | 49                | 779              | 970              | 41                | 4                 | 492               | 0                 | 0    | 2                 |
| 2004 | 4354             | 1655             | 24               | 359              | 193              | 102              | 0                | 165              | 812              | 0                 | 2699              | 234              | 67               | 34               | 36                | 805              | 971              | 42                | 3                 | 507               | 0                 | 0    | 0                 |
| 2005 | 4080             | 1523             | 21               | 340              | 183              | 100              | 0                | 185              | 694              | 0                 | 2557              | 258              | 63               | 20               | 41                | 804              | 865              | 50                | 0                 | 454               | 0                 | 3    | 0                 |
| 2006 | 3930             | 1405             | 18               | 285              | 180              | 93               | 0                | 200              | 629              | 0                 | 2525              | 221              | 80               | 30               | 31                | 810              | 863              | 52                | 0                 | 438               | 0                 | 0    | 0                 |
| 2007 | 3805             | 1403             | 23               | 305              | 144              | 104              | 0                | 191              | 636              | 0                 | 2402              | 233              | 48               | 36               | 40                | 734              | 878              | 55                | 0                 | 376               | 0                 | 0    | 1                 |
| 2008 | 3693             | 1297             | 17               | 278              | 135              | 78               | 0                | 203              | 586              | 0                 | 2396              | 243              | 73               | 27               | 23                | 742              | 873              | 50                | 0                 | 365               | 0                 | 0    | 0                 |
| 2009 | 3580             | 1299             | 20               | 293              | 159              | 81               | 0                | 158              | 588              | 0                 | 2281              | 183              | 61               | 27               | 31                | 749              | 858              | 55                | 0                 | 317               | 0                 | 0    | 0                 |
| 2010 | 3461             | 1189             | 17               | 253              | 130              | 75               | 0                | 150              | 565              | 0                 | 2272              | 207              | 75               | 18               | 41                | 675              | 858              | 66                | 0                 | 331               | 0                 | 0    | 0                 |
| 2011 | 3670             | 1078             | 24               | 221              | 120              | 66               | 0                | 161              | 487              | 0                 | 2592              | 200              | 44               | 25               | 18                | 606              | 742              | 60                | 0                 | 893               | 0                 | 1    | 1                 |
| 2012 | 3222             | 1073             | 25               | 217              | 144              | 60               | 0                | 150              | 477              | 0                 | 2149              | 190              | 47               | 29               | 14                | 697              | 828              | 68                | 0                 | 274               | 0                 | 0    | 3                 |
| 2013 | 3094             | 1065             | 16               | 205              | 118              | 48               | 0                | 168              | 511              | 0                 | 2029              | 174              | 76               | 30               | 16                | 711              | 722              | 58                | 1                 | 241               | 0                 | 0    | 0                 |
| 2014 | 2964             | 1056             | 21               | 211              | 125              | 57               | 0                | 157              | 484              | 0                 | 1908              | 167              | 50               | 25               | 14                | 599              | 680              | 55                | 0                 | 315               | 0                 | 0    | 1                 |
| 2015 | 2834             | 941              | 19               | 188              | 112              | 51               | 0                | 140              | 432              | 0                 | 1893              | 166              | 50               | 25               | 14                | 595              | 675              | 55                | 0                 | 312               | 0                 | 0    | 1                 |
| 2000 | 321              | 190              | 9                | 54               | 45               | 6                | 0                | 18               | 58               | 0                 | 131               | 6                | 7                | 5                | 4                 | 26               | 51               | 0                 | 0                 | 32                | 0                 | 0    | 0                 |
| 2001 | 311              | 189              | 9                | 49               | 41               | 5                | 0                | 11               | 74               | 0                 | 122               | 9                | 4                | 6                | 5                 | 29               | 33               | 2                 | 0                 | 34                | 0                 | 0    | 0                 |
| 2002 | 310              | 189              | 10               | 48               | 45               | 10               | 0                | 18               | 58               | 0                 | 121               | 4                | 4                | 2                | 1                 | 33               | 36               | 3                 | 0                 | 36                | 0                 | 1    | 0                 |
| 2003 | 311              | 191              | 11               | 47               | 55               | 8                | 0                | 11               | 58               | 0                 | 120               | 5                | 1                | 5                | 5                 | 33               | 36               | 1                 | 0                 | 34                | 0                 | 0    | 0                 |
| 2004 | 305              | 192              | 12               | 50               | 58               | 15               | 0                | 10               | 46               | 0                 | 113               | 4                | 4                | 9                | 3                 | 27               | 39               | 0                 | 0                 | 27                | 0                 | 0    | 0                 |
| 2005 | 294              | 192              | 13               | 41               | 57               | 11               | 0                | 16               | 53               | 0                 | 102               | 9                | 3                | 2                | 4                 | 26               | 22               | 2                 | 0                 | 33                | 0                 | 0    | 0                 |
| 2006 | 283              | 184              | 14               | 39               | 66               | 7                | 0                | 9                | 48               | 0                 | 99                | 4                | 4                | 6                | 4                 | 30               | 28               | 0                 | 0                 | 24                | 0                 | 0    | 0                 |
| 2007 | 267              | 176              | 12               | 36               | 66               | 5                | 0                | 9                | 47               | 0                 | 91                | 7                | 3                | 3                | 1                 | 24               | 35               | 3                 | 0                 | 16                | 0                 | 0    | 0                 |
| 2008 | 248              | 165              | 11               | 30               | 65               | 11               | 0                | 5                | 44               | 0                 | 83                | 0                | 2                | 3                | 4                 | 25               | 33               | 0                 | 0                 | 17                | 0                 | 0    | 0                 |
| 2009 | 227              | 152              | 20               | 28               | 42               | 12               | 0                | 6                | 45               | 0                 | 75                | 4                | 3                | 2                | 2                 | 21               | 32               | 0                 | 0                 | 11                | 0                 | 0    | 0                 |
| 2010 | 207              | 139              | 2                | 18               | 72               | 16               | 0                | 2                | 29               | 0                 | 68                | 5                | 4                | 1                | 0                 | 23               | 20               | 1                 | 0                 | 14                | 0                 | 0    | 0                 |
| 2011 | 187              | 123              | 5                | 26               | 51               | 9                | 0                | 3                | 28               | 0                 | 64                | 3                | 4                | 3                | 4                 | 14               | 24               | 0                 | 0                 | 13                | 0                 | 0    | 0                 |
| 2012 | 167              | 109              | 4                | 30               | 38               | 13               | 0                | 1                | 23               | 0                 | 58                | 4                | 2                | 7                | 0                 | 16               | 20               | 0                 | 0                 | 9                 | 0                 | 0    | 2                 |
| 2013 | 149              | 97               | 3                | 20               | 42               | 10               | 0                | 2                | 21               | 0                 | 52                | 3                | 3                | 3                | 1                 | 15               | 17               | 0                 | 0                 | 10                | 0                 | 0    | 0                 |
| 2014 | 137              | 87               | 3                | 18               | 37               | 9                | 0                | 2                | 19               | 0                 | 50                | 3                | 2                | 3                | 1                 | 14               | 17               | 0                 | 0                 | 9                 | 0                 | 0    | 0                 |
| 2015 | 129              | 82               | 3                | 17               | 35               | 9                | 0                | 1                | 18               | 0                 | 47                | 3                | 2                | 3                | 1                 | 13               | 16               | 0                 | 0                 | 9                 | 0                 | 0    | 0                 |
| 2000 | 419              | 192              | 7                | 54               | 29               | 9                | 0                | 7                | 85               | 0                 | 227               | 30               | 4                | 4                | 10                | 39               | 71               | 1                 | 0                 | 68                | 0                 | 0    | 0                 |
| 2001 | 386              | 178              | 6                | 44               | 28               | 8                | 0                | 22               | 70               | 0                 | 208               | 19               | 2                | 1                | 10                | 39               | 74               | 0                 | 0                 | 60                | 0                 | 0    | 1                 |
| 2002 | 358              | 169              | 8                | 37               | 35               | 7                | 0                | 4                | 79               | 0                 | 189               | 28               | 4                | 3                | 10                | 32               | 57               | 3                 | 0                 | 53                | 0                 | 0    | 0                 |
| 2003 | 332              | 163              | 9                | 67               | 20               | 8                | 0                | 8                | 52               | 0                 | 169               | 20               | 7                | 5                | 12                | 28               | 52               | 0                 | 0                 | 44                | 0                 | 0    | 0                 |
| 2004 | 314              | 160              | 2                | 54               | 22               | 14               | 0                | 7                | 62               | 0                 | 154               | 20               | 3                | 0                | 3                 | 25               | 52               | 3                 | 0                 | 48                | 0                 | 0    | 0                 |
| 2005 | 299              | 155              | 7                | 46               | 30               | 14               | 0                | 9                | 49               | 0                 | 144               | 22               | 4                | 0                | 7                 | 25               | 47               | 0                 | 0                 | 39                | 0                 | 0    | 0                 |
| 2006 | 287              | 146              | 4                | 43               | 12               | 12               | 0                | 7                | 67               | 0                 | 141               | 16               | 4                | 3                | 7                 | 33               | 43               | 0                 | 0                 | 35                | 0                 | 0    | 0                 |
| 2007 | 269              | 136              | 7                | 40               | 21               | 15               | 0                | 7                | 47               | 0                 | 133               | 10               | 3                | 0                | 5                 | 26               | 50               | 0                 | 0                 | 39                | 0                 | 0    | 0                 |
| 2008 | 252              | 129              | 4                | 37               | 16               | 15               | 0                | 11               | 46               | 0                 | 123               | 8                | 4                | 3                | 4                 | 28               | 43               | 3                 | 0                 | 30                | 0                 | 0    | 0                 |
| 2009 | 234              | 119              | 1                | 30               | 16               | 22               | 0                | 13               | 37               | 0                 | 115               | 19               | 2                | 2                | 2                 | 24               | 35               | 1                 | 0                 | 28                | 0                 | 0    | 0                 |
| 2010 | 215              | 111              | 1                | 27               | 18               | 22               | 0                | 4                | 39               | 0                 | 104               | 5                | 6                | 0                | 9                 | 28               | 32               | 1                 | 0                 | 24                | 0                 | 0    | 0                 |
| 2011 | 198              | 106              | 9                | 30               | 15               | 14               | 0                | 7                | 32               | 0                 | 92                | 3                | 4                | 3                | 6                 | 22               | 34               | 0                 | 0                 | 21                | 0                 | 0    | 0                 |
| 2012 | 182              | 96               | 4                | 35               | 11               | 15               | 0                | 3                | 28               | 0                 | 86                | 12               | 1                | 1                | 6                 | 25               | 24               | 0                 | 0                 | 15                | 0                 | 0    | 1                 |
| 2013 | 172              | 90               | 4                | 27               | 12               | 14               | 0                | 4                | 29               | 0                 | 82                | 6                | 3                | 1                | 6                 | 22               | 26               | 0                 | 0                 | 17                | 0                 | 0    | 1                 |
| 2014 | 167              | 86               | 4                | 25               | 12               | 14               | 0                | 4                | 27               | 0                 | 81                | 6                | 3                | 1                | 6                 | 22               | 26               | 0                 | 0                 | 17                | 0                 | 0    | 1                 |
| 2015 | 164              | 81               | 3                | 24               | 11               | 13               | 0                | 4                | 26               | 0                 | 83                | 6                | 3                | 1                | 6                 | 22               | 26               | 0                 | 0                 | 17                | 0                 | 0    | 1                 |
| 2000 | 26               | 13               | 0                | 5                | 5                | 0                | 0                | 0                | 2                | 0                 | 13                | 0                | 0                | 0                | 2                 | 6                | 1                | 0                 | 0                 | 4                 | 0                 | 0    | 0                 |
| 2001 | 25               | 12               | 0                | 5                | 4                | 1                | 0                | 0                | 2                | 0                 | 13                | 0                | 0                | 0                | 1                 | 6                | 1                | 0                 | 0                 | 4                 | 0                 | 0    | 0                 |
| 2002 | 23               | 12               | 0                | 7                | 2                | 1                | 0                | 1                | 2                | 0                 | 11                | 0                | 0                | 0                | 0                 | 6                | 1                | 0                 | 0                 | 3                 | 0                 | 0    | 0                 |
| 2003 | 22               | 11               | 0                | 5                | 2                | 1                | 0                | 2                | 2                | 0                 | 11                | 0                | 1                | 0                | 0                 | 7                | 1                | 0                 | 0                 | 2                 | 0                 | 0    | 0                 |
| 2004 | 20               | 10               | 0                | 5                | 2                | 0                | 0                | 2                | 2                | 0                 | 10                | 0                | 1                | 1                | 0                 | 6                | 2                | 0                 | 0                 | 1                 | 0                 | 0    | 0                 |
| 2005 | 19               | 10               | 0                | 5                | 3                | 0                | 0                | 2                | 1                | 0                 | 9                 | 0                | 1                | 1                | 0                 | 4                | 2                | 0                 | 0                 | 2                 | 0                 | 0    | 0                 |
| 2006 | 18               | 9                | 0                | 5                | 2                | 0                | 0                | 1                | 1                | 0                 | 9                 | 1                | 0                | 1                | 0                 | 3                | 3                | 0                 | 0                 | 2                 | 0                 | 0    | 0                 |
| 2007 | 16               | 8                | 0                | 3                | 3                | 0                | 0                | 1                | 1                | 0                 | 8                 | 1                | 0                | 0                | 0                 | 4                | 2                | 0                 | 0                 | 2                 | 0                 | 0    | 0                 |
| 2008 | 15               | 8                | 0                | 3                | 3                | 1                | 0                | 0                | 1                | 0                 | 7                 | 1                | 0                | 0                | 0                 | 4                | 1                | 0                 | 0                 | 2                 | 0                 | 0    | 0                 |
| 2009 | 15               | 7                | 0                | 3                | 2                | 1                | 0                | 1                | 1                | 0                 | 8                 | 0                | 0                | 0                | 0                 | 4                | 1                | 0                 | 0                 | 2                 | 0                 | 0    | 0                 |
| 2010 | 14               | 7                | 0                | 3                | 1                | 1                | 0                | 1                | 1                | 0                 | 7                 | 0                | 0                | 0                | 1                 | 4                | 1                | 0                 | 0                 | 2                 | 0                 | 0    | 0                 |
| 2011 | 14               | 7                | 0                | 3                | 1                | 0                | 0                | 2                | 1                | 0                 | 7                 | 0                | 0                | 0                | 0                 | 4                | 2                | 0                 | 0                 | 1                 | 0                 | 0    | 0                 |
| 2012 | 13               | 7                | 0                | 4                | 1                | 0                | 0                | 1                |                  |                   |                   |                  |                  |                  |                   |                  |                  |                   |                   |                   |                   |      |                   |

Webappendix 6. Estimated numbers of deaths by cause in neonates, children aged 1-59 months at the global, regional and country levels in 2000-2015

| Year        | 0-28 days        |                  |                  |                  |                  |                  |                  |                  |                  |                   |                   | 1-59 months      |                  |                  |                   |                  |                  |                   |                   |                   |                   |      |                   |   |
|-------------|------------------|------------------|------------------|------------------|------------------|------------------|------------------|------------------|------------------|-------------------|-------------------|------------------|------------------|------------------|-------------------|------------------|------------------|-------------------|-------------------|-------------------|-------------------|------|-------------------|---|
|             | USD <sup>1</sup> | NEO <sup>2</sup> | PNE <sup>3</sup> | PRE <sup>4</sup> | INT <sup>5</sup> | SEP <sup>6</sup> | TET <sup>7</sup> | OTH <sup>8</sup> | CON <sup>9</sup> | DIA <sup>10</sup> | POS <sup>11</sup> | PNE <sup>3</sup> | PRE <sup>4</sup> | INT <sup>5</sup> | MEN <sup>12</sup> | OTH <sup>8</sup> | CON <sup>9</sup> | DIA <sup>10</sup> | MEA <sup>13</sup> | INJ <sup>14</sup> | MAL <sup>15</sup> | AIDS | PER <sup>16</sup> |   |
| Netherlands | 2001             | 108              | 71               | 2                | 24               | 32               | 3                | 0                | 5                | 6                 | 0                 | 37               | 1                | 10               | 4                 | 0                | 13               | 6                 | 1                 | 0                 | 3                 | 0    | 0                 | 0 |
|             | 2002             | 103              | 68               | 2                | 23               | 30               | 3                | 0                | 4                | 6                 | 0                 | 35               | 1                | 9                | 4                 | 1                | 10               | 7                 | 0                 | 0                 | 3                 | 0    | 0                 | 0 |
|             | 2003             | 97               | 64               | 2                | 21               | 29               | 3                | 0                | 4                | 6                 | 0                 | 33               | 0                | 8                | 4                 | 1                | 11               | 6                 | 1                 | 0                 | 2                 | 0    | 0                 | 0 |
|             | 2004             | 91               | 61               | 2                | 20               | 27               | 2                | 0                | 4                | 6                 | 0                 | 30               | 1                | 5                | 2                 | 2                | 9                | 7                 | 1                 | 0                 | 2                 | 0    | 0                 | 0 |
|             | 2005             | 86               | 56               | 2                | 17               | 26               | 2                | 0                | 4                | 5                 | 0                 | 30               | 2                | 5                | 2                 | 1                | 11               | 6                 | 1                 | 0                 | 2                 | 0    | 0                 | 0 |
|             | 2006             | 79               | 53               | 1                | 17               | 24               | 2                | 0                | 4                | 5                 | 0                 | 26               | 3                | 4                | 1                 | 1                | 9                | 6                 | 0                 | 0                 | 2                 | 0    | 0                 | 0 |
|             | 2007             | 74               | 49               | 1                | 16               | 24               | 2                | 0                | 2                | 3                 | 0                 | 25               | 2                | 3                | 2                 | 1                | 11               | 3                 | 0                 | 0                 | 2                 | 0    | 0                 | 0 |
|             | 2008             | 67               | 45               | 1                | 17               | 22               | 2                | 0                | 0                | 4                 | 0                 | 22               | 1                | 4                | 3                 | 1                | 10               | 2                 | 0                 | 0                 | 1                 | 0    | 0                 | 0 |
|             | 2009             | 61               | 42               | 2                | 15               | 21               | 2                | 0                | 0                | 3                 | 0                 | 19               | 0                | 5                | 3                 | 1                | 9                | 0                 | 0                 | 0                 | 1                 | 0    | 0                 | 0 |
|             | 2010             | 56               | 37               | 1                | 13               | 18               | 1                | 0                | 0                | 3                 | 0                 | 19               | 1                | 5                | 3                 | 0                | 8                | 1                 | 0                 | 0                 | 1                 | 0    | 0                 | 0 |
|             | 2011             | 50               | 33               | 1                | 12               | 16               | 1                | 0                | 0                | 3                 | 0                 | 17               | 1                | 3                | 2                 | 1                | 7                | 1                 | 0                 | 0                 | 1                 | 0    | 0                 | 0 |
|             | 2012             | 44               | 29               | 1                | 11               | 14               | 1                | 0                | 0                | 2                 | 0                 | 15               | 1                | 3                | 2                 | 0                | 7                | 1                 | 0                 | 0                 | 1                 | 0    | 0                 | 0 |
|             | 2013             | 39               | 26               | 1                | 9                | 13               | 1                | 0                | 0                | 2                 | 0                 | 13               | 1                | 3                | 2                 | 0                | 6                | 1                 | 0                 | 0                 | 1                 | 0    | 0                 | 0 |
|             | 2014             | 36               | 23               | 1                | 8                | 11               | 1                | 0                | 0                | 2                 | 0                 | 13               | 1                | 3                | 2                 | 0                | 6                | 1                 | 0                 | 0                 | 1                 | 0    | 0                 | 0 |
|             | 2015             | 33               | 21               | 1                | 8                | 10               | 1                | 0                | 0                | 2                 | 0                 | 12               | 1                | 2                | 2                 | 0                | 5                | 1                 | 0                 | 0                 | 1                 | 0    | 0                 | 0 |
|             | 2000             | 1196             | 729              | 6                | 214              | 132              | 39               | 0                | 38               | 300               | 0                 | 467              | 22               | 39               | 9                 | 34               | 171              | 127               | 0                 | 0                 | 65                | 0    | 0                 | 0 |
|             | 2001             | 1188             | 738              | 3                | 247              | 114              | 42               | 0                | 48               | 284               | 0                 | 450              | 25               | 28               | 7                 | 34               | 158              | 142               | 2                 | 0                 | 54                | 0    | 0                 | 0 |
|             | 2002             | 1167             | 733              | 1                | 229              | 123              | 51               | 0                | 59               | 271               | 0                 | 434              | 18               | 27               | 4                 | 33               | 168              | 120               | 4                 | 0                 | 60                | 0    | 0                 | 0 |
|             | 2003             | 1147             | 726              | 3                | 203              | 136              | 54               | 0                | 48               | 281               | 0                 | 421              | 19               | 29               | 2                 | 29               | 135              | 144               | 1                 | 0                 | 62                | 0    | 0                 | 0 |
|             | 2004             | 1137             | 713              | 2                | 198              | 145              | 40               | 0                | 59               | 269               | 0                 | 424              | 19               | 21               | 6                 | 12               | 168              | 136               | 3                 | 0                 | 58                | 0    | 0                 | 1 |
|             | 2005             | 1093             | 690              | 3                | 214              | 130              | 67               | 0                | 49               | 227               | 0                 | 403              | 22               | 27               | 6                 | 22               | 150              | 114               | 2                 | 0                 | 58                | 0    | 0                 | 0 |
|             | 2006             | 1034             | 655              | 0                | 194              | 112              | 47               | 0                | 48               | 254               | 0                 | 379              | 16               | 24               | 1                 | 10               | 168              | 113               | 6                 | 0                 | 42                | 0    | 0                 | 0 |
|             | 2007             | 963              | 613              | 2                | 180              | 116              | 70               | 0                | 63               | 181               | 0                 | 350              | 13               | 24               | 1                 | 14               | 141              | 106               | 0                 | 0                 | 50                | 0    | 0                 | 0 |
|             | 2008             | 888              | 550              | 5                | 150              | 99               | 51               | 0                | 65               | 180               | 0                 | 338              | 13               | 26               | 4                 | 10               | 146              | 90                | 4                 | 0                 | 45                | 0    | 0                 | 0 |
|             | 2009             | 821              | 510              | 2                | 161              | 68               | 39               | 0                | 65               | 175               | 0                 | 311              | 15               | 23               | 5                 | 13               | 140              | 79                | 0                 | 0                 | 36                | 0    | 0                 | 0 |
|             | 2010             | 765              | 479              | 7                | 130              | 73               | 40               | 0                | 59               | 170               | 0                 | 286              | 15               | 27               | 0                 | 15               | 107              | 84                | 2                 | 0                 | 36                | 0    | 0                 | 0 |
|             | 2011             | 739              | 459              | 1                | 117              | 75               | 37               | 0                | 62               | 167               | 0                 | 280              | 13               | 21               | 7                 | 13               | 112              | 81                | 3                 | 0                 | 31                | 0    | 0                 | 0 |
|             | 2012             | 725              | 445              | 3                | 152              | 60               | 37               | 0                | 57               | 136               | 0                 | 280              | 16               | 31               | 4                 | 8                | 108              | 79                | 0                 | 0                 | 32                | 0    | 0                 | 2 |
|             | 2013             | 699              | 435              | 0                | 145              | 64               | 44               | 0                | 47               | 136               | 0                 | 264              | 11               | 33               | 3                 | 1                | 123              | 60                | 7                 | 0                 | 27                | 0    | 0                 | 0 |
|             | 2014             | 692              | 426              | 1                | 132              | 63               | 38               | 0                | 53               | 139               | 0                 | 266              | 13               | 28               | 5                 | 7                | 111              | 71                | 3                 | 0                 | 29                | 0    | 0                 | 1 |
|             | 2015             | 682              | 432              | 1                | 134              | 64               | 38               | 0                | 53               | 141               | 0                 | 250              | 12               | 26               | 4                 | 7                | 104              | 66                | 3                 | 0                 | 27                | 0    | 0                 | 1 |
| New Zealand | 2000             | 401              | 187              | 3                | 79               | 24               | 4                | 0                | 19               | 58                | 0                 | 214              | 20               | 11               | 2                 | 17               | 57               | 58                | 2                 | 0                 | 47                | 0    | 0                 | 1 |
|             | 2001             | 390              | 182              | 1                | 75               | 21               | 4                | 0                | 16               | 65                | 0                 | 208              | 9                | 24               | 2                 | 21               | 59               | 43                | 5                 | 0                 | 44                | 0    | 0                 | 1 |
|             | 2002             | 382              | 184              | 4                | 84               | 26               | 9                | 0                | 11               | 50                | 0                 | 198              | 12               | 19               | 3                 | 15               | 35               | 53                | 1                 | 0                 | 57                | 0    | 0                 | 1 |
|             | 2003             | 384              | 183              | 2                | 82               | 21               | 14               | 0                | 20               | 45                | 0                 | 201              | 10               | 7                | 6                 | 11               | 57               | 68                | 2                 | 0                 | 40                | 0    | 0                 | 0 |
|             | 2004             | 381              | 182              | 3                | 74               | 27               | 15               | 0                | 18               | 45                | 0                 | 199              | 30               | 7                | 3                 | 12               | 39               | 61                | 3                 | 0                 | 43                | 0    | 0                 | 1 |
|             | 2005             | 385              | 182              | 5                | 70               | 27               | 10               | 0                | 20               | 50                | 0                 | 203              | 19               | 15               | 4                 | 14               | 54               | 45                | 2                 | 0                 | 49                | 0    | 0                 | 1 |
|             | 2006             | 392              | 183              | 6                | 68               | 23               | 11               | 0                | 15               | 61                | 0                 | 209              | 22               | 16               | 9                 | 3                | 63               | 54                | 1                 | 0                 | 40                | 0    | 0                 | 0 |
|             | 2007             | 399              | 189              | 6                | 73               | 21               | 4                | 0                | 28               | 57                | 0                 | 210              | 24               | 12               | 1                 | 8                | 63               | 47                | 1                 | 0                 | 54                | 0    | 0                 | 0 |
|             | 2008             | 412              | 202              | 15               | 71               | 24               | 11               | 0                | 23               | 58                | 0                 | 210              | 19               | 22               | 3                 | 11               | 52               | 44                | 1                 | 0                 | 59                | 0    | 0                 | 0 |
|             | 2009             | 414              | 213              | 10               | 77               | 36               | 10               | 0                | 22               | 58                | 0                 | 201              | 18               | 19               | 1                 | 3                | 48               | 48                | 8                 | 0                 | 55                | 0    | 0                 | 0 |
|             | 2010             | 410              | 222              | 7                | 93               | 29               | 13               | 0                | 17               | 63                | 0                 | 188              | 17               | 11               | 4                 | 7                | 57               | 36                | 0                 | 0                 | 57                | 0    | 0                 | 0 |
|             | 2011             | 403              | 226              | 15               | 96               | 18               | 13               | 0                | 17               | 67                | 0                 | 177              | 12               | 16               | 4                 | 11               | 35               | 44                | 3                 | 0                 | 53                | 0    | 0                 | 0 |
|             | 2012             | 389              | 215              | 10               | 87               | 27               | 12               | 0                | 18               | 61                | 0                 | 174              | 14               | 14               | 3                 | 7                | 43               | 39                | 3                 | 0                 | 51                | 0    | 0                 | 0 |
|             | 2013             | 372              | 208              | 10               | 84               | 26               | 12               | 0                | 17               | 59                | 0                 | 164              | 14               | 13               | 3                 | 6                | 40               | 37                | 3                 | 0                 | 48                | 0    | 0                 | 0 |
|             | 2014             | 356              | 195              | 9                | 79               | 25               | 11               | 0                | 16               | 55                | 0                 | 161              | 13               | 13               | 3                 | 6                | 39               | 36                | 3                 | 0                 | 47                | 0    | 0                 | 0 |
|             | 2015             | 342              | 184              | 9                | 74               | 23               | 10               | 0                | 15               | 52                | 0                 | 158              | 13               | 13               | 3                 | 6                | 39               | 36                | 3                 | 0                 | 46                | 0    | 0                 | 0 |
| Norway      | 2000             | 287              | 156              | 3                | 26               | 26               | 3                | 0                | 36               | 61                | 0                 | 131              | 6                | 9                | 3                 | 14               | 34               | 45                | 1                 | 0                 | 18                | 0    | 0                 | 0 |
|             | 2001             | 271              | 148              | 0                | 26               | 35               | 3                | 0                | 29               | 56                | 0                 | 123              | 4                | 5                | 4                 | 0                | 44               | 44                | 0                 | 0                 | 20                | 0    | 2                 | 0 |
|             | 2002             | 256              | 141              | 0                | 24               | 27               | 1                | 0                | 35               | 54                | 0                 | 115              | 5                | 4                | 7                 | 2                | 50               | 34                | 0                 | 0                 | 12                | 0    | 0                 | 0 |
|             | 2003             | 248              | 134              | 1                | 38               | 33               | 3                | 0                | 21               | 39                | 0                 | 114              | 6                | 6                | 6                 | 6                | 42               | 31                | 0                 | 0                 | 19                | 0    | 0                 | 0 |
|             | 2004             | 236              | 134              | 0                | 29               | 21               | 3                | 0                | 23               | 57                | 0                 | 102              | 1                | 0                | 8                 | 3                | 30               | 39                | 0                 | 0                 | 20                | 0    | 0                 | 1 |
|             | 2005             | 227              | 129              | 1                | 29               | 27               | 2                | 0                | 34               | 35                | 0                 | 98               | 6                | 13               | 4                 | 0                | 33               | 32                | 0                 | 0                 | 10                | 0    | 0                 | 0 |
|             | 2006             | 225              | 127              | 1                | 31               | 33               | 8                | 0                | 18               | 36                | 0                 | 98               | 0                | 7                | 7                 | 5                | 29               | 28                | 5                 | 0                 | 16                | 0    | 0                 | 0 |
|             | 2007             | 219              | 125              | 0                | 28               | 28               | 2                | 0                | 30               | 37                | 0                 | 94               | 10               | 7                | 8                 | 4                | 30               | 25                | 0                 | 0                 | 10                | 0    | 0                 | 0 |
|             | 2008             | 214              | 123              | 0                | 28               | 17               | 3                | 0                | 38               | 38                | 0                 | 91               | 2                | 6                | 1                 | 0                | 40               | 29                | 3                 | 0                 | 10                | 0    | 0                 | 0 |
|             | 2009             | 213              | 121              | 1                | 30               | 22               | 4                | 0                | 28               | 37                | 0                 | 92               | 10               | 8                | 4                 | 5                | 27               | 27                | 2                 | 0                 | 9                 | 0    | 0                 | 0 |
|             | 2010             | 204              | 122              | 0                | 31               | 22               | 5                | 0                | 23               | 41                | 0                 | 82               | 3                | 4                | 6                 | 1                | 34               | 27                | 3                 | 0                 | 4                 | 0    | 0                 | 0 |
|             | 2011             | 198              | 116              | 0                | 30               | 15               | 2                | 0                | 28               | 41                | 0                 | 82               | 3                | 10               | 4                 | 4                | 28               | 28                | 0                 | 0                 | 6                 | 0    | 0                 | 0 |
|             | 2012             | 190              | 108              | 1                | 30               | 15               | 3                | 0                | 23               | 36                | 0                 | 82               | 6                | 6                | 6                 | 1                | 35               | 21                | 0                 | 0                 | 7                 | 0    | 0                 | 0 |
|             | 2013             | 174              | 99               | 0                | 27               | 17               | 5                | 0                | 22               | 28                | 0                 | 75               | 1                | 3                | 1                 | 1                | 37               | 25                | 1                 | 0                 | 5                 | 0    | 0                 | 0 |
|             | 2014             | 166              | 97               | 0                | 26               | 14               | 3                | 0                | 22               | 31                | 0                 | 69               | 3                | 5                | 3                 | 2                | 29               | 21                | 0                 | 0                 | 5                 | 0    | 0                 | 0 |
|             | 2015             | 160              | 91               | 0                | 24               | 13               | 3                | 0                | 21               | 30                | 0                 | 69               | 3                | 5                | 3                 | 2                | 29               | 21                | 0                 | 0                 | 5                 | 0    | 0                 | 0 |
| Poland      | 2000             | 3376             | 2060             | 30               | 755              | 274              | 197              | 0                | 77               | 727               | 0                 | 1316             | 138              | 118              | 37                | 38               | 301              | 499               | 6                 | 0                 | 179               | 0    | 0                 | 0 |
|             | 2001             | 3068             | 1845             | 26               | 698              | 228              | 214              | 0                | 58               | 622               | 0                 | 1223             | 113              | 117              | 38                | 34               | 279              | 470               | 6                 | 0                 | 165               | 0    | 1                 | 0 |
|             | 2002             | 2874             | 1753             | 24               | 692              | 188              | 196              | 0                | 78               | 575               | 0                 | 1121             | 85               | 121              | 48                | 24               | 251              | 427               | 3                 | 0                 | 161               | 0    | 1                 | 0 |
|             | 2003             | 2785             | 1703             | 30               | 685              | 180              | 193              | 0                | 82               | 532               | 0                 | 1082             | 98               | 113              | 36                | 27               | 232              | 415               | 1                 | 0                 | 157               | 0    | 3                 | 0 |
|             | 2004             | 2741             | 1681             | 26               | 692              | 161              | 173              | 0                | 80               | 548               | 0                 | 1060             | 103              | 128              | 34                | 22               | 213              | 423               | 1                 | 0                 | 134               | 0    | 1                 | 0 |
|             | 2005             | 2760             | 1676             | 26               | 657              | 165              | 165              | 0                | 78               | 585               | 0                 | 1084             | 102              | 127              | 36                | 22               | 223              | 411               | 7                 | 0                 | 153               | 0    | 0                 | 1 |
|             | 2006             | 2773             | 1688             | 30               | 784              | 166              | 140              | 0                |                  |                   |                   |                  |                  |                  |                   |                  |                  |                   |                   |                   |                   |      |                   |   |



Webappendix 6. Estimated numbers of deaths by cause in neonates, children aged 1-59 months at the global, regional and country levels in 2000-2015

| Year               | 0-28 days        |                  |                  |                  |                  |                  |                  |                  |                  |                   |                   | 1-59 months      |                  |                  |                   |                  |                  |                   |                   |                   |                   |      |                   |     |
|--------------------|------------------|------------------|------------------|------------------|------------------|------------------|------------------|------------------|------------------|-------------------|-------------------|------------------|------------------|------------------|-------------------|------------------|------------------|-------------------|-------------------|-------------------|-------------------|------|-------------------|-----|
|                    | USD <sup>1</sup> | NEO <sup>2</sup> | PNE <sup>3</sup> | PRE <sup>4</sup> | INT <sup>5</sup> | SEP <sup>6</sup> | TET <sup>7</sup> | OTH <sup>8</sup> | CON <sup>9</sup> | DIA <sup>10</sup> | POS <sup>11</sup> | PNE <sup>3</sup> | PRE <sup>4</sup> | INT <sup>5</sup> | MEN <sup>12</sup> | OTH <sup>8</sup> | CON <sup>9</sup> | DIA <sup>10</sup> | MEA <sup>13</sup> | INJ <sup>14</sup> | MAL <sup>15</sup> | AIDS | PER <sup>16</sup> |     |
| Romania            | 2012             | 777              | 588              | 85               | 141              | 47               | 47               | 0                | 33               | 235               | 0                 | 189              | 41               | 1                | 0                 | 8                | 28               | 59                | 4                 | 0                 | 46                | 0    | 1                 | 0   |
|                    | 2013             | 749              | 566              | 65               | 171              | 70               | 52               | 0                | 32               | 176               | 0                 | 183              | 44               | 1                | 0                 | 5                | 52               | 37                | 3                 | 0                 | 42                | 0    | 0                 | 0   |
|                    | 2014             | 719              | 538              | 70               | 136              | 69               | 54               | 0                | 29               | 181               | 0                 | 181              | 43               | 1                | 0                 | 9                | 36               | 46                | 4                 | 0                 | 42                | 0    | 1                 | 0   |
|                    | 2015             | 687              | 513              | 67               | 129              | 66               | 51               | 0                | 28               | 173               | 0                 | 174              | 41               | 1                | 0                 | 8                | 34               | 44                | 4                 | 0                 | 41                | 0    | 1                 | 0   |
|                    | 2000             | 7019             | 3493             | 475              | 1425             | 391              | 84               | 0                | 306              | 812               | 0                 | 3526             | 1711             | 1                | 5                 | 152              | 400              | 566               | 162               | 0                 | 519               | 0    | 8                 | 1   |
|                    | 2001             | 6799             | 3465             | 462              | 1316             | 339              | 107              | 0                | 313              | 927               | 0                 | 3334             | 1595             | 5                | 2                 | 151              | 364              | 544               | 132               | 0                 | 538               | 0    | 2                 | 0   |
|                    | 2002             | 6290             | 3313             | 443              | 1140             | 303              | 95               | 0                | 297              | 1034              | 0                 | 2977             | 1418             | 4                | 1                 | 157              | 346              | 518               | 122               | 0                 | 407               | 0    | 5                 | 0   |
|                    | 2003             | 5586             | 3025             | 364              | 1167             | 251              | 69               | 0                | 352              | 823               | 0                 | 2561             | 1142             | 1                | 1                 | 100              | 315              | 529               | 105               | 0                 | 363               | 0    | 5                 | 0   |
|                    | 2004             | 4912             | 2687             | 293              | 1254             | 172              | 67               | 0                | 260              | 642               | 0                 | 2225             | 1116             | 4                | 1                 | 73               | 218              | 358               | 91                | 0                 | 362               | 0    | 2                 | 0   |
|                    | 2005             | 4365             | 2421             | 262              | 1105             | 167              | 74               | 0                | 185              | 629               | 0                 | 1944             | 929              | 5                | 0                 | 66               | 179              | 403               | 68                | 9                 | 283               | 0    | 2                 | 0   |
|                    | 2006             | 3956             | 2227             | 227              | 1021             | 173              | 42               | 0                | 189              | 574               | 0                 | 1729             | 817              | 2                | 0                 | 60               | 209              | 307               | 57                | 2                 | 274               | 0    | 1                 | 0   |
|                    | 2007             | 3669             | 2074             | 275              | 920              | 147              | 18               | 0                | 174              | 539               | 0                 | 1595             | 767              | 1                | 0                 | 57               | 200              | 309               | 29                | 0                 | 229               | 0    | 3                 | 0   |
|                    | 2008             | 3438             | 1961             | 295              | 796              | 143              | 32               | 0                | 166              | 528               | 0                 | 1477             | 749              | 2                | 0                 | 37               | 190              | 238               | 34                | 0                 | 227               | 0    | 0                 | 0   |
|                    | 2009             | 3236             | 1847             | 222              | 798              | 113              | 32               | 0                | 151              | 531               | 0                 | 1389             | 660              | 2                | 0                 | 34               | 188              | 256               | 27                | 0                 | 219               | 0    | 3                 | 0   |
|                    | 2010             | 3010             | 1713             | 217              | 688              | 114              | 13               | 0                | 159              | 521               | 0                 | 1297             | 648              | 0                | 0                 | 39               | 177              | 223               | 30                | 0                 | 178               | 0    | 2                 | 0   |
|                    | 2011             | 2774             | 1550             | 195              | 654              | 125              | 30               | 0                | 99               | 447               | 0                 | 1224             | 573              | 2                | 0                 | 39               | 171              | 220               | 26                | 0                 | 190               | 0    | 3                 | 0   |
|                    | 2012             | 2495             | 1406             | 164              | 654              | 110              | 27               | 0                | 91               | 360               | 0                 | 1089             | 501              | 4                | 0                 | 20               | 158              | 242               | 16                | 3                 | 144               | 0    | 1                 | 0   |
|                    | 2013             | 2247             | 1256             | 155              | 540              | 95               | 19               | 0                | 93               | 355               | 0                 | 991              | 472              | 2                | 0                 | 26               | 139              | 190               | 19                | 1                 | 140               | 0    | 2                 | 0   |
|                    | 2014             | 2028             | 1126             | 139              | 484              | 85               | 17               | 0                | 83               | 319               | 0                 | 902              | 429              | 2                | 0                 | 24               | 127              | 173               | 18                | 1                 | 128               | 0    | 2                 | 0   |
|                    | 2015             | 1882             | 1047             | 129              | 450              | 79               | 16               | 0                | 77               | 296               | 0                 | 835              | 397              | 1                | 0                 | 22               | 117              | 160               | 16                | 1                 | 118               | 0    | 1                 | 0   |
| Russian Federation | 2000             | 33636            | 18482            | 1287             | 8011             | 2311             | 1676             | 0                | 1212             | 3984              | 0                 | 15154            | 3344             | 322              | 193               | 701              | 3616             | 3090              | 591               | 0                 | 2820              | 0    | 340               | 137 |
|                    | 2001             | 33123            | 18261            | 1214             | 7875             | 2265             | 1638             | 0                | 1210             | 4059              | 0                 | 14862            | 3181             | 329              | 196               | 664              | 3542             | 3100              | 535               | 0                 | 2765              | 0    | 408               | 141 |
|                    | 2002             | 31642            | 17450            | 1090             | 7479             | 2146             | 1543             | 0                | 1174             | 4017              | 0                 | 14192            | 2908             | 325              | 194               | 608              | 3397             | 3029              | 472               | 0                 | 2629              | 0    | 486               | 144 |
|                    | 2003             | 29534            | 16368            | 943              | 6979             | 1998             | 1430             | 0                | 1117             | 3901              | 0                 | 13166            | 2556             | 313              | 185               | 538              | 3173             | 2879              | 399               | 0                 | 2416              | 0    | 564               | 143 |
|                    | 2004             | 27451            | 15066            | 793              | 6394             | 1827             | 1288             | 0                | 1047             | 3716              | 0                 | 12385            | 2305             | 309              | 182               | 489              | 3059             | 2812              | 344               | 0                 | 2283              | 0    | 459               | 143 |
|                    | 2005             | 25573            | 13989            | 666              | 5932             | 1693             | 1149             | 0                | 990              | 3560              | 0                 | 11584            | 2059             | 303              | 179               | 440              | 2915             | 2731              | 295               | 0                 | 2135              | 0    | 385               | 142 |
|                    | 2006             | 23893            | 12925            | 553              | 5476             | 1560             | 1011             | 0                | 936              | 3388              | 0                 | 10968            | 1843             | 299              | 175               | 396              | 2788             | 2654              | 255               | 0                 | 1995              | 0    | 421               | 142 |
|                    | 2007             | 22343            | 12025            | 461              | 5099             | 1451             | 896              | 0                | 889              | 3229              | 0                 | 10318            | 1459             | 292              | 169               | 353              | 2638             | 2554              | 223               | 0                 | 1844              | 0    | 460               | 145 |
|                    | 2008             | 21141            | 11322            | 394              | 4805             | 1366             | 803              | 0                | 854              | 3099              | 0                 | 9819             | 1485             | 287              | 165               | 320              | 2520             | 2476              | 201               | 0                 | 1723              | 0    | 496               | 147 |
|                    | 2009             | 20221            | 10697            | 339              | 4541             | 1290             | 741              | 0                | 816              | 2971              | 0                 | 9524             | 1392             | 291              | 166               | 298              | 2495             | 2466              | 189               | 0                 | 1653              | 0    | 427               | 148 |
|                    | 2010             | 19607            | 10316            | 298              | 4380             | 1243             | 699              | 0                | 796              | 2899              | 0                 | 9291             | 1317             | 296              | 167               | 279              | 2474             | 2463              | 180               | 0                 | 1590              | 0    | 374               | 150 |
|                    | 2011             | 19314            | 10221            | 272              | 4339             | 1230             | 681              | 0                | 798              | 2900              | 0                 | 9093             | 1240             | 298              | 167               | 260              | 2424             | 2434              | 170               | 0                 | 1518              | 0    | 432               | 151 |
|                    | 2012             | 19145            | 10185            | 249              | 4321             | 1225             | 668              | 0                | 805              | 2918              | 0                 | 8960             | 1143             | 322              | 179               | 288              | 2438             | 2406              | 156               | 0                 | 1416              | 0    | 460               | 152 |
|                    | 2013             | 19260            | 10098            | 233              | 4282             | 1213             | 649              | 0                | 806              | 2914              | 0                 | 9162             | 1152             | 342              | 190               | 286              | 2521             | 2510              | 156               | 0                 | 1441              | 0    | 408               | 155 |
|                    | 2014             | 18916            | 10032            | 217              | 4249             | 1203             | 636              | 0                | 807              | 2919              | 0                 | 8884             | 1115             | 353              | 196               | 273              | 2513             | 2535              | 150               | 0                 | 1409              | 0    | 188               | 151 |
|                    | 2015             | 18542            | 9741             | 204              | 4121             | 1167             | 610              | 0                | 790              | 2850              | 0                 | 8801             | 1087             | 356              | 198               | 262              | 2494             | 2537              | 146               | 0                 | 1386              | 0    | 186               | 149 |
| San Marino         | 2000             | 1                | 0                | 0                | 0                | 0                | 0                | 0                | 0                | 0                 | 0                 | 1                | 0                | 0                | 0                 | 0                | 0                | 0                 | 0                 | 0                 | 0                 | 0    | 0                 | 0   |
|                    | 2001             | 1                | 0                | 0                | 0                | 0                | 0                | 0                | 0                | 0                 | 0                 | 1                | 0                | 0                | 0                 | 0                | 0                | 0                 | 0                 | 0                 | 0                 | 0    | 0                 | 0   |
|                    | 2002             | 1                | 0                | 0                | 0                | 0                | 0                | 0                | 0                | 0                 | 0                 | 1                | 0                | 0                | 0                 | 0                | 0                | 0                 | 0                 | 0                 | 0                 | 0    | 0                 | 0   |
|                    | 2003             | 1                | 0                | 0                | 0                | 0                | 0                | 0                | 0                | 0                 | 0                 | 1                | 0                | 0                | 0                 | 0                | 0                | 0                 | 0                 | 0                 | 0                 | 0    | 0                 | 0   |
|                    | 2004             | 1                | 0                | 0                | 0                | 0                | 0                | 0                | 0                | 0                 | 0                 | 1                | 0                | 0                | 0                 | 0                | 0                | 0                 | 0                 | 0                 | 0                 | 0    | 0                 | 0   |
|                    | 2005             | 1                | 0                | 0                | 0                | 0                | 0                | 0                | 0                | 0                 | 0                 | 1                | 0                | 0                | 0                 | 0                | 0                | 0                 | 0                 | 0                 | 0                 | 0    | 0                 | 0   |
|                    | 2006             | 1                | 0                | 0                | 0                | 0                | 0                | 0                | 0                | 0                 | 0                 | 1                | 0                | 0                | 0                 | 0                | 0                | 0                 | 0                 | 0                 | 0                 | 0    | 0                 | 0   |
|                    | 2007             | 1                | 0                | 0                | 0                | 0                | 0                | 0                | 0                | 0                 | 0                 | 1                | 0                | 0                | 0                 | 0                | 0                | 0                 | 0                 | 0                 | 0                 | 0    | 0                 | 0   |
|                    | 2008             | 1                | 0                | 0                | 0                | 0                | 0                | 0                | 0                | 0                 | 0                 | 1                | 0                | 0                | 0                 | 0                | 0                | 0                 | 0                 | 0                 | 0                 | 0    | 0                 | 0   |
|                    | 2009             | 1                | 0                | 0                | 0                | 0                | 0                | 0                | 0                | 0                 | 0                 | 1                | 0                | 0                | 0                 | 0                | 0                | 0                 | 0                 | 0                 | 0                 | 0    | 0                 | 0   |
|                    | 2010             | 1                | 0                | 0                | 0                | 0                | 0                | 0                | 0                | 0                 | 0                 | 1                | 0                | 0                | 0                 | 0                | 0                | 0                 | 0                 | 0                 | 0                 | 0    | 0                 | 0   |
|                    | 2011             | 1                | 0                | 0                | 0                | 0                | 0                | 0                | 0                | 0                 | 0                 | 1                | 0                | 0                | 0                 | 0                | 0                | 0                 | 0                 | 0                 | 0                 | 0    | 0                 | 0   |
|                    | 2012             | 1                | 0                | 0                | 0                | 0                | 0                | 0                | 0                | 0                 | 0                 | 1                | 0                | 0                | 0                 | 0                | 0                | 0                 | 0                 | 0                 | 0                 | 0    | 0                 | 0   |
|                    | 2013             | 1                | 0                | 0                | 0                | 0                | 0                | 0                | 0                | 0                 | 0                 | 1                | 0                | 0                | 0                 | 0                | 0                | 0                 | 0                 | 0                 | 0                 | 0    | 0                 | 0   |
|                    | 2014             | 1                | 0                | 0                | 0                | 0                | 0                | 0                | 0                | 0                 | 0                 | 1                | 0                | 0                | 0                 | 0                | 0                | 0                 | 0                 | 0                 | 0                 | 0    | 0                 | 0   |
|                    | 2015             | 1                | 0                | 0                | 0                | 0                | 0                | 0                | 0                | 0                 | 0                 | 1                | 0                | 0                | 0                 | 0                | 0                | 0                 | 0                 | 0                 | 0                 | 0    | 0                 | 0   |
| Serbia             | 2000             | 1607             | 985              | 13               | 469              | 233              | 75               | 0                | 22               | 174               | 0                 | 622              | 74               | 32               | 32                | 23               | 114              | 250               | 15                | 0                 | 77                | 0    | 6                 | 0   |
|                    | 2001             | 1510             | 928              | 7                | 480              | 184              | 59               | 0                | 38               | 161               | 0                 | 582              | 50               | 70               | 17                | 19               | 124              | 229               | 11                | 0                 | 61                | 0    | 0                 | 0   |
|                    | 2002             | 1371             | 836              | 8                | 413              | 197              | 49               | 0                | 28               | 140               | 0                 | 535              | 40               | 54               | 37                | 11               | 170              | 175               | 3                 | 0                 | 46                | 0    | 0                 | 0   |
|                    | 2003             | 1184             | 732              | 15               | 394              | 131              | 37               | 0                | 22               | 134               | 0                 | 452              | 59               | 25               | 19                | 17               | 110              | 155               | 12                | 0                 | 54                | 0    | 0                 | 0   |
|                    | 2004             | 1014             | 627              | 2                | 333              | 105              | 33               | 0                | 26               | 129               | 0                 | 387              | 55               | 19               | 9                 | 14               | 89               | 164               | 0                 | 0                 | 35                | 0    | 0                 | 2   |
|                    | 2005             | 897              | 547              | 13               | 284              | 113              | 39               | 0                | 12               | 87                | 0                 | 350              | 42               | 18               | 26                | 20               | 93               | 122               | 8                 | 0                 | 22                | 0    | 0                 | 0   |
|                    | 2006             | 815              | 498              | 9                | 261              | 101              | 24               | 0                | 16               | 87                | 0                 | 317              | 25               | 31               | 19                | 11               | 99               | 107               | 0                 | 0                 | 25                | 0    | 0                 | 0   |
|                    | 2007             | 765              | 476              | 10               | 278              | 76               | 9                | 0                | 19               | 84                | 0                 | 289              | 39               | 31               | 17                | 12               | 69               | 93                | 5                 | 0                 | 24                | 0    | 0                 | 0   |
|                    | 2008             | 744              | 460              | 1                | 264              | 79               | 10               | 0                | 22               | 84                | 0                 | 284              | 35               | 11               | 11                | 4                | 87               | 112               | 0                 | 0                 | 24                | 0    | 0                 | 0   |
|                    | 2009             | 720              | 447              | 15               | 240              | 104              | 7                | 0                | 15               | 65                | 0                 | 273              | 31               | 26               | 15                | 10               | 84               | 86                | 0                 | 0                 | 20                | 0    | 2                 | 0   |
|                    | 2010             | 697              | 437              | 6                | 269              | 73               | 9                | 0                | 10               | 71                | 0                 | 260              | 24               | 41               | 21                | 3                | 60               | 84                | 0                 | 0                 | 28                | 0    | 0                 | 0   |
|                    | 2011             | 668              | 428              | 9                | 249              | 56               | 14               | 0                | 24               | 75                | 0                 | 240              | 28               | 17               | 19                | 8                | 76               | 72                | 0                 | 0                 | 21                | 0    | 0                 | 0   |
|                    | 2012             | 651              | 412              | 6                | 243              | 65               | 4                | 0                | 23               | 71                | 0                 | 239              | 24               | 37               | 16                | 2                | 85               | 52                | 0                 | 0                 | 23                | 0    | 0                 | 0   |
|                    | 2013             | 635              | 405              | 11               | 249              | 69               | 8                | 0                | 16               | 52                | 0                 | 230</            |                  |                  |                   |                  |                  |                   |                   |                   |                   |      |                   |     |

Webappendix 6. Estimated numbers of deaths by cause in neonates, children aged 1-59 months at the global, regional and country levels in 2000-2015

| Year | USD <sup>1</sup> | 0-28 days        |                  |                  |                  |                  |                  |                  |                  |                   |                   | 1-59 months      |                  |                  |                   |                  |                  |                   |                   |                   |                   |      |                   |   |
|------|------------------|------------------|------------------|------------------|------------------|------------------|------------------|------------------|------------------|-------------------|-------------------|------------------|------------------|------------------|-------------------|------------------|------------------|-------------------|-------------------|-------------------|-------------------|------|-------------------|---|
|      |                  | NEO <sup>2</sup> | PNE <sup>3</sup> | PRE <sup>4</sup> | INT <sup>5</sup> | SEP <sup>6</sup> | TET <sup>7</sup> | OTH <sup>8</sup> | CON <sup>9</sup> | DIA <sup>10</sup> | POS <sup>11</sup> | PNE <sup>3</sup> | PRE <sup>4</sup> | INT <sup>5</sup> | MEN <sup>12</sup> | OTH <sup>8</sup> | CON <sup>9</sup> | DIA <sup>10</sup> | MEA <sup>13</sup> | INJ <sup>14</sup> | MAL <sup>15</sup> | AIDS | PER <sup>16</sup> |   |
| 2007 | 2590             | 1610             | 16               | 578              | 169              | 193              | 0                | 240              | 414              | 0                 | 980               | 50               | 108              | 22               | 45                | 312              | 293              | 17                | 0                 | 127               | 0                 | 0    | 6                 |   |
| 2008 | 2515             | 1571             | 11               | 530              | 185              | 170              | 0                | 248              | 427              | 0                 | 944               | 30               | 84               | 26               | 38                | 316              | 320              | 4                 | 0                 | 120               | 0                 | 0    | 7                 |   |
| 2009 | 2402             | 1557             | 13               | 520              | 222              | 167              | 0                | 260              | 376              | 0                 | 845               | 38               | 79               | 28               | 44                | 283              | 266              | 12                | 0                 | 92                | 0                 | 1    | 1                 |   |
| 2010 | 2249             | 1465             | 9                | 456              | 200              | 116              | 0                | 247              | 436              | 0                 | 784               | 33               | 60               | 17               | 24                | 278              | 258              | 6                 | 0                 | 104               | 0                 | 0    | 4                 |   |
| 2011 | 2132             | 1410             | 6                | 419              | 218              | 155              | 0                | 205              | 407              | 0                 | 722               | 28               | 73               | 17               | 26                | 237              | 267              | 3                 | 0                 | 62                | 0                 | 1    | 8                 |   |
| 2012 | 1978             | 1327             | 10               | 449              | 169              | 108              | 0                | 253              | 337              | 0                 | 651               | 20               | 46               | 17               | 19                | 270              | 199              | 4                 | 0                 | 68                | 1                 | 0    | 6                 |   |
| 2013 | 1808             | 1194             | 7                | 385              | 155              | 121              | 0                | 225              | 301              | 0                 | 614               | 16               | 40               | 16               | 26                | 267              | 165              | 3                 | 0                 | 79                | 0                 | 0    | 4                 |   |
| 2014 | 1665             | 1081             | 6                | 346              | 148              | 106              | 0                | 189              | 286              | 0                 | 584               | 18               | 46               | 15               | 21                | 229              | 184              | 3                 | 0                 | 62                | 0                 | 0    | 5                 |   |
| 2015 | 1566             | 1039             | 6                | 332              | 143              | 102              | 0                | 182              | 275              | 0                 | 527               | 17               | 42               | 13               | 19                | 207              | 166              | 2                 | 0                 | 56                | 0                 | 0    | 5                 |   |
| 2000 | 310              | 163              | 2                | 34               | 20               | 15               | 0                | 22               | 71               | 0                 | 147               | 4                | 17               | 8                | 4                 | 31               | 69               | 0                 | 0                 | 12                | 0                 | 0    | 1                 |   |
| 2001 | 318              | 173              | 1                | 31               | 27               | 13               | 0                | 40               | 61               | 0                 | 145               | 5                | 13               | 2                | 3                 | 57               | 48               | 0                 | 0                 | 17                | 0                 | 0    | 0                 |   |
| 2002 | 340              | 186              | 3                | 46               | 33               | 14               | 0                | 29               | 61               | 0                 | 154               | 5                | 12               | 3                | 6                 | 64               | 49               | 0                 | 0                 | 14                | 0                 | 0    | 2                 |   |
| 2003 | 373              | 204              | 5                | 49               | 35               | 15               | 0                | 30               | 71               | 0                 | 169               | 9                | 14               | 14               | 5                 | 63               | 48               | 0                 | 0                 | 15                | 0                 | 0    | 0                 |   |
| 2004 | 393              | 218              | 0                | 29               | 42               | 17               | 0                | 38               | 92               | 0                 | 175               | 11               | 6                | 3                | 4                 | 63               | 40               | 1                 | 0                 | 44                | 0                 | 0    | 2                 |   |
| 2005 | 408              | 223              | 0                | 45               | 42               | 18               | 0                | 43               | 75               | 0                 | 185               | 10               | 20               | 4                | 5                 | 78               | 52               | 1                 | 0                 | 12                | 1                 | 0    | 0                 |   |
| 2006 | 397              | 216              | 0                | 50               | 38               | 19               | 0                | 30               | 79               | 0                 | 181               | 6                | 13               | 5                | 4                 | 71               | 63               | 3                 | 0                 | 16                | 0                 | 0    | 0                 |   |
| 2007 | 387              | 215              | 0                | 54               | 36               | 14               | 0                | 33               | 78               | 0                 | 172               | 9                | 5                | 3                | 8                 | 80               | 52               | 3                 | 0                 | 10                | 0                 | 2    | 0                 |   |
| 2008 | 368              | 199              | 4                | 36               | 26               | 21               | 0                | 48               | 64               | 0                 | 169               | 19               | 8                | 2                | 2                 | 58               | 57               | 3                 | 0                 | 17                | 0                 | 0    | 3                 |   |
| 2009 | 349              | 182              | 2                | 49               | 32               | 13               | 0                | 26               | 60               | 0                 | 167               | 8                | 14               | 1                | 1                 | 74               | 49               | 0                 | 0                 | 19                | 0                 | 1    | 0                 |   |
| 2010 | 345              | 178              | 0                | 39               | 30               | 14               | 0                | 38               | 57               | 0                 | 167               | 11               | 11               | 4                | 4                 | 82               | 45               | 1                 | 0                 | 8                 | 0                 | 0    | 0                 |   |
| 2011 | 332              | 176              | 7                | 35               | 38               | 12               | 0                | 31               | 53               | 0                 | 156               | 13               | 13               | 6                | 0                 | 71               | 37               | 1                 | 0                 | 14                | 0                 | 0    | 0                 |   |
| 2012 | 333              | 176              | 3                | 49               | 36               | 10               | 0                | 33               | 45               | 0                 | 157               | 6                | 7                | 5                | 3                 | 84               | 44               | 2                 | 0                 | 7                 | 0                 | 0    | 0                 |   |
| 2013 | 335              | 176              | 1                | 38               | 32               | 9                | 0                | 38               | 58               | 0                 | 159               | 10               | 23               | 2                | 1                 | 65               | 44               | 1                 | 0                 | 11                | 0                 | 1    | 0                 |   |
| 2014 | 338              | 178              | 4                | 41               | 35               | 11               | 0                | 35               | 53               | 0                 | 160               | 10               | 15               | 4                | 1                 | 75               | 43               | 2                 | 0                 | 11                | 0                 | 0    | 0                 |   |
| 2015 | 343              | 181              | 4                | 42               | 36               | 11               | 0                | 35               | 54               | 0                 | 162               | 10               | 15               | 4                | 1                 | 76               | 43               | 2                 | 0                 | 11                | 0                 | 0    | 0                 |   |
| 2000 | 430              | 265              | 2                | 102              | 35               | 12               | 0                | 31               | 83               | 0                 | 165               | 4                | 9                | 0                | 9                 | 60               | 49               | 2                 | 0                 | 33                | 0                 | 0    | 0                 |   |
| 2001 | 418              | 258              | 2                | 100              | 34               | 11               | 0                | 30               | 81               | 0                 | 160               | 8                | 9                | 6                | 11                | 54               | 46               | 1                 | 0                 | 23                | 0                 | 0    | 1                 |   |
| 2002 | 401              | 245              | 2                | 95               | 32               | 11               | 0                | 28               | 77               | 0                 | 156               | 7                | 3                | 5                | 12                | 56               | 49               | 0                 | 0                 | 25                | 0                 | 0    | 0                 |   |
| 2003 | 382              | 242              | 2                | 94               | 31               | 11               | 0                | 28               | 77               | 0                 | 140               | 5                | 6                | 3                | 6                 | 46               | 46               | 2                 | 0                 | 25                | 0                 | 0    | 0                 |   |
| 2004 | 372              | 234              | 2                | 91               | 30               | 10               | 0                | 27               | 75               | 0                 | 138               | 3                | 12               | 3                | 1                 | 52               | 48               | 1                 | 0                 | 18                | 0                 | 0    | 0                 |   |
| 2005 | 367              | 236              | 2                | 91               | 30               | 10               | 0                | 27               | 76               | 0                 | 131               | 7                | 3                | 1                | 5                 | 39               | 50               | 1                 | 0                 | 24                | 0                 | 0    | 0                 |   |
| 2006 | 363              | 239              | 2                | 93               | 30               | 11               | 0                | 27               | 77               | 0                 | 124               | 2                | 2                | 0                | 5                 | 52               | 37               | 0                 | 0                 | 24                | 0                 | 0    | 0                 |   |
| 2007 | 356              | 245              | 2                | 95               | 31               | 11               | 0                | 28               | 79               | 0                 | 111               | 3                | 3                | 6                | 3                 | 40               | 40               | 0                 | 0                 | 17                | 0                 | 0    | 0                 |   |
| 2008 | 358              | 245              | 1                | 95               | 30               | 11               | 0                | 28               | 80               | 0                 | 113               | 5                | 12               | 2                | 2                 | 40               | 35               | 0                 | 0                 | 16                | 0                 | 0    | 0                 |   |
| 2009 | 360              | 252              | 1                | 97               | 31               | 11               | 0                | 28               | 82               | 0                 | 108               | 4                | 8                | 1                | 5                 | 33               | 31               | 0                 | 0                 | 23                | 0                 | 2    | 1                 |   |
| 2010 | 361              | 250              | 1                | 97               | 31               | 11               | 0                | 28               | 82               | 0                 | 111               | 5                | 7                | 2                | 2                 | 37               | 44               | 2                 | 0                 | 13                | 0                 | 0    | 0                 |   |
| 2011 | 359              | 246              | 1                | 95               | 30               | 11               | 0                | 28               | 81               | 0                 | 113               | 3                | 14               | 3                | 1                 | 41               | 46               | 0                 | 0                 | 6                 | 0                 | 0    | 0                 |   |
| 2012 | 356              | 249              | 1                | 96               | 30               | 12               | 0                | 28               | 82               | 0                 | 107               | 1                | 6                | 3                | 0                 | 35               | 40               | 1                 | 0                 | 20                | 0                 | 0    | 1                 |   |
| 2013 | 351              | 243              | 1                | 94               | 29               | 11               | 0                | 27               | 80               | 0                 | 108               | 3                | 9                | 2                | 1                 | 36               | 42               | 1                 | 0                 | 13                | 0                 | 0    | 1                 |   |
| 2014 | 338              | 237              | 1                | 91               | 28               | 11               | 0                | 26               | 79               | 0                 | 101               | 2                | 3                | 8                | 2                 | 1                | 34               | 39                | 1                 | 0                 | 12                | 0    | 0                 | 0 |
| 2015 | 334              | 231              | 1                | 89               | 27               | 11               | 0                | 26               | 77               | 0                 | 103               | 3                | 9                | 2                | 1                 | 35               | 40               | 1                 | 0                 | 12                | 0                 | 0    | 1                 |   |
| 2000 | 417              | 237              | 1                | 147              | 46               | 10               | 0                | 2                | 31               | 0                 | 180               | 33               | 2                | 0                | 4                 | 55               | 38               | 36                | 0                 | 12                | 0                 | 0    | 0                 |   |
| 2001 | 389              | 220              | 1                | 135              | 41               | 11               | 0                | 1                | 32               | 0                 | 169               | 36               | 2                | 1                | 8                 | 42               | 46               | 22                | 0                 | 12                | 0                 | 0    | 0                 |   |
| 2002 | 369              | 214              | 1                | 129              | 37               | 12               | 0                | 1                | 33               | 0                 | 155               | 30               | 2                | 1                | 7                 | 42               | 46               | 18                | 0                 | 11                | 0                 | 0    | 0                 |   |
| 2003 | 361              | 215              | 0                | 128              | 36               | 14               | 0                | 1                | 36               | 0                 | 146               | 28               | 1                | 1                | 7                 | 41               | 44               | 14                | 0                 | 10                | 0                 | 0    | 0                 |   |
| 2004 | 355              | 222              | 0                | 131              | 35               | 17               | 0                | 0                | 39               | 0                 | 133               | 25               | 1                | 1                | 7                 | 37               | 42               | 11                | 0                 | 10                | 0                 | 0    | 0                 |   |
| 2005 | 343              | 222              | 0                | 129              | 33               | 19               | 0                | 0                | 42               | 0                 | 121               | 23               | 2                | 0                | 2                 | 30               | 41               | 11                | 0                 | 11                | 0                 | 0    | 0                 |   |
| 2006 | 323              | 212              | 2                | 141              | 18               | 17               | 0                | 6                | 29               | 0                 | 111               | 21               | 0                | 2                | 4                 | 28               | 49               | 0                 | 0                 | 7                 | 0                 | 0    | 0                 |   |
| 2007 | 295              | 197              | 2                | 123              | 19               | 6                | 0                | 7                | 40               | 0                 | 98                | 17               | 0                | 0                | 12                | 21               | 36               | 3                 | 0                 | 9                 | 0                 | 0    | 0                 |   |
| 2008 | 267              | 177              | 0                | 112              | 21               | 16               | 0                | 5                | 24               | 0                 | 90                | 8                | 3                | 0                | 5                 | 30               | 34               | 6                 | 0                 | 3                 | 0                 | 0    | 0                 |   |
| 2009 | 242              | 159              | 0                | 116              | 14               | 6                | 0                | 5                | 19               | 0                 | 83                | 17               | 0                | 0                | 5                 | 33               | 23               | 2                 | 0                 | 4                 | 0                 | 0    | 0                 |   |
| 2010 | 215              | 140              | 2                | 108              | 14               | 4                | 0                | 1                | 11               | 0                 | 75                | 13               | 0                | 0                | 9                 | 16               | 26               | 2                 | 0                 | 9                 | 0                 | 0    | 0                 |   |
| 2011 | 188              | 122              | 1                | 87               | 12               | 6                | 0                | 3                | 13               | 0                 | 66                | 10               | 1                | 0                | 5                 | 21               | 22               | 3                 | 0                 | 5                 | 0                 | 0    | 0                 |   |
| 2012 | 167              | 108              | 1                | 77               | 11               | 5                | 0                | 2                | 12               | 0                 | 59                | 9                | 1                | 0                | 4                 | 19               | 20               | 2                 | 0                 | 4                 | 0                 | 0    | 0                 |   |
| 2013 | 154              | 99               | 1                | 70               | 10               | 5                | 0                | 2                | 11               | 0                 | 55                | 8                | 1                | 0                | 4                 | 17               | 18               | 2                 | 0                 | 4                 | 0                 | 0    | 0                 |   |
| 2014 | 145              | 92               | 1                | 65               | 9                | 5                | 0                | 2                | 10               | 0                 | 53                | 8                | 1                | 0                | 4                 | 17               | 18               | 2                 | 0                 | 4                 | 0                 | 0    | 0                 |   |
| 2015 | 135              | 87               | 1                | 62               | 9                | 4                | 0                | 2                | 10               | 0                 | 48                | 7                | 1                | 0                | 4                 | 15               | 16               | 2                 | 0                 | 3                 | 0                 | 0    | 0                 |   |
| 2000 | 7543             | 4483             | 425              | 1849             | 529              | 298              | 0                | 316              | 1065             | 0                 | 3060              | 686              | 101              | 64               | 119               | 543              | 652              | 151               | 10                | 424               | 0                 | 273  | 37                |   |
| 2001 | 6953             | 4125             | 376              | 1699             | 486              | 267              | 0                | 295              | 1002             | 0                 | 2828              | 604              | 94               | 59               | 104               | 490              | 606              | 129               | 13                | 388               | 0                 | 307  | 36                |   |
| 2002 | 6481             | 3876             | 337              | 1595             | 456              | 245              | 0                | 281              | 963              | 0                 | 2605              | 525              | 86               | 53               | 91                | 445              | 562              | 108               | 13                | 355               | 0                 | 331  | 36                |   |
| 2003 | 6171             | 3701             | 303              | 1523             | 435              | 232              | 0                | 271              | 938              | 0                 | 2470              | 467              | 80               | 50               | 82                | 422              | 536              | 94                | 12                | 336               | 0                 | 354  | 36                |   |
| 2004 | 5989             | 3607             | 275              | 1486             | 424              | 227              | 0                | 265              | 930              | 0                 | 2382              | 419              | 76               | 47               | 75                | 404              | 518              | 82                | 12                | 321               | 0                 | 392  | 37                |   |
| 2005 | 6008             | 3668             | 262              | 1513             | 431              | 234              | 0                | 268              | 958              | 0                 | 2340              | 397              | 74               | 46               | 72                | 407              | 522              | 77                | 11                | 322               | 0                 | 374  | 38                |   |
| 2006 | 6176             | 3811             | 259              | 1574             | 448              | 244              | 0                | 278              | 1007             | 0                 | 2365              | 379              | 77               | 47               | 81                | 426              | 531              | 73                | 21                | 321               | 0                 | 366  | 41                |   |
| 2007 | 6411             | 4013             | 261              | 1660             | 472              | 256              | 0                | 291              | 1073             | 0                 | 2398              | 365              | 91               | 55               | 86                | 459              | 562              | 77                | 20                | 320               | 0                 | 317  | 45                |   |
| 2008 | 6660             | 4143             | 263              | 1716             | 488              | 256              | 0                | 300              | 1121             | 0                 | 2517              | 378              | 110              | 67               | 92                | 538              | 632              | 102               | 18                | 339               | 0                 | 189  | 51                |   |
| 2009 | 6712             | 4219             | 263              | 1750             | 497              | 250              | 0                | 305              | 1155             | 0                 | 2493              | 360              | 95               | 57               | 86                | 579              | 618              | 137               | 17                | 328               | 0                 | 155  | 61                |   |
| 2010 | 6588             | 4086             | 250              | 1696             | 481              | 232              | 0                | 297              | 1130             | 0                 | 2502              | 352              | 84               | 51               | 81                | 612              | 615              | 172               | 26                | 323               | 0                 | 119  | 67                |   |
| 2011 | 6208             | 3833             | 227              | 1592             | 451              | 210              | 0                | 279              | 1072             | 0                 | 2375              | 336              | 74               | 44               | 73                | 581              | 598              | 169               | 25                | 313               | 0                 | 93   | 68                |   |
|      |                  |                  |                  |                  |                  |                  |                  |                  |                  |                   |                   |                  |                  |                  |                   |                  |                  |                   |                   |                   |                   |      |                   |   |

Webappendix 6. Estimated numbers of deaths by cause in neonates, children aged 1-59 months at the global, regional and country levels in 2000-2015

| Year | 0-28 days        |                  |                  |                  |                  |                  |                  |                  |                  |                   | 1-59 months       |                  |                  |                  |                   |                  |                  |                   |                   |                   |                   |      |                   |    |
|------|------------------|------------------|------------------|------------------|------------------|------------------|------------------|------------------|------------------|-------------------|-------------------|------------------|------------------|------------------|-------------------|------------------|------------------|-------------------|-------------------|-------------------|-------------------|------|-------------------|----|
|      | USD <sup>1</sup> | NEO <sup>2</sup> | PNE <sup>3</sup> | PRE <sup>4</sup> | INT <sup>5</sup> | SEP <sup>6</sup> | TET <sup>7</sup> | OTH <sup>8</sup> | CON <sup>9</sup> | DIA <sup>10</sup> | POS <sup>11</sup> | PNE <sup>3</sup> | PRE <sup>4</sup> | INT <sup>5</sup> | MEN <sup>12</sup> | OTH <sup>8</sup> | CON <sup>9</sup> | DIA <sup>10</sup> | MEA <sup>13</sup> | INJ <sup>14</sup> | MAL <sup>15</sup> | AIDS | PER <sup>16</sup> |    |
| 2002 | 542981           | 319748           | 41716            | 90633            | 87876            | 6434             | 2471             | 45390            | 43471            | 1727              | 223233            | 52715            | 2808             | 377              | 6778              | 44313            | 34047            | 23423             | 1919              | 54570             | 9                 | 565  | 1709              |    |
| 2003 | 502965           | 299908           | 37884            | 87595            | 80459            | 6134             | 1900             | 41837            | 42526            | 1572              | 203057            | 45150            | 2583             | 374              | 5962              | 41548            | 32163            | 21644             | 2037              | 49299             | 11                | 581  | 1706              |    |
| 2004 | 461944           | 275499           | 33078            | 83069            | 70955            | 5389             | 1596             | 38055            | 41932            | 1425              | 186445            | 39562            | 2710             | 326              | 4979              | 38719            | 31457            | 19627             | 2031              | 44735             | 7                 | 597  | 1695              |    |
| 2005 | 423643           | 250419           | 27419            | 78389            | 62539            | 4668             | 1347             | 33738            | 41012            | 1306              | 173224            | 35339            | 2595             | 384              | 4335              | 35260            | 30279            | 16996             | 3089              | 42641             | 10                | 597  | 1700              |    |
| 2006 | 387488           | 224336           | 22159            | 72180            | 56614            | 4023             | 1016             | 28783            | 38523            | 1038              | 163152            | 32953            | 2805             | 426              | 4224              | 32115            | 30201            | 14659             | 2543              | 40965             | 8                 | 596  | 1658              |    |
| 2007 | 352093           | 198406           | 17370            | 65386            | 50467            | 3701             | 864              | 24831            | 34900            | 886               | 153687            | 31217            | 2808             | 455              | 4208              | 29010            | 29962            | 12508             | 2737              | 38490             | 4                 | 619  | 1670              |    |
| 2008 | 318822           | 174182           | 14365            | 57266            | 44355            | 3754             | 726              | 22391            | 30606            | 720               | 144640            | 29631            | 2759             | 495              | 4305              | 26878            | 27801            | 10747             | 3272              | 36486             | 5                 | 601  | 1659              |    |
| 2009 | 289219           | 154637           | 12116            | 50825            | 39455            | 3666             | 496              | 20156            | 27349            | 573               | 134582            | 27599            | 2861             | 462              | 4226              | 25942            | 26996            | 9597              | 1481              | 33237             | 2                 | 520  | 1660              |    |
| 2010 | 266132           | 138724           | 10494            | 45455            | 34350            | 3646             | 273              | 18525            | 25365            | 616               | 127408            | 25028            | 3117             | 1114             | 3999              | 25884            | 26187            | 8220              | 836               | 30890             | 4                 | 455  | 1674              |    |
| 2011 | 247900           | 128124           | 10002            | 41065            | 30353            | 3725             | 127              | 17841            | 24296            | 715               | 119776            | 22492            | 3345             | 1951             | 3628              | 25532            | 24250            | 7273              | 480               | 28715             | 8                 | 414  | 1689              |    |
| 2012 | 233171           | 120228           | 9641             | 37967            | 27028            | 3669             | 67               | 17362            | 23582            | 911               | 112943            | 20366            | 3525             | 2826             | 3125              | 24572            | 22245            | 6619              | 324               | 27247             | 3                 | 384  | 1706              |    |
| 2013 | 218767           | 112387           | 9295             | 34730            | 23878            | 3626             | 35               | 16984            | 22671            | 1169              | 106380            | 18693            | 3897             | 4076             | 2645              | 23258            | 20058            | 5869              | 570               | 25285             | 6                 | 418  | 1606              |    |
| 2014 | 205968           | 106936           | 8968             | 32528            | 22619            | 3581             | 24               | 16528            | 21465            | 1222              | 99032             | 17082            | 3695             | 4382             | 2351              | 21627            | 18514            | 5329              | 523               | 23629             | 4                 | 404  | 1493              |    |
| 2015 | 193985           | 100048           | 8382             | 30432            | 21156            | 3366             | 23               | 15443            | 20104            | 1141              | 93937             | 16230            | 3507             | 4157             | 2230              | 20522            | 17573            | 5043              | 491               | 22382             | 3                 | 383  | 1416              |    |
| 2000 | 585027           | 331419           | 49967            | 86546            | 93219            | 5217             | 3861             | 50390            | 39745            | 2475              | 253608            | 68125            | 2454             | 282              | 8477              | 45735            | 31882            | 27345             | 1995              | 65184             | 7                 | 495  | 1628              |    |
| 2001 | 554286           | 324671           | 46069            | 87387            | 91570            | 5317             | 3160             | 47716            | 41472            | 1982              | 229615            | 57382            | 2467             | 240              | 7038              | 43202            | 32848            | 23098             | 2371              | 58782             | 6                 | 532  | 1651              |    |
| 2002 | 519912           | 308734           | 41180            | 86246            | 85588            | 5225             | 2423             | 44635            | 41745            | 1692              | 211178            | 49482            | 2344             | 184              | 6105              | 41302            | 33174            | 21534             | 1872              | 52948             | 9                 | 563  | 1661              |    |
| 2003 | 482382           | 289686           | 37409            | 83503            | 78381            | 4996             | 1863             | 41149            | 40841            | 1545              | 192696            | 42430            | 2151             | 183              | 5399              | 38939            | 31345            | 20142             | 2016              | 47845             | 11                | 578  | 1658              |    |
| 2004 | 443233           | 265937           | 32634            | 79309            | 69022            | 4314             | 1566             | 37387            | 40303            | 1402              | 177296            | 37206            | 2233             | 177              | 4484              | 36382            | 30723            | 18376             | 2016              | 43453             | 7                 | 592  | 1648              |    |
| 2005 | 406101           | 241394           | 27012            | 74798            | 60765            | 3644             | 1320             | 33107            | 39462            | 1286              | 164707            | 33162            | 2186             | 237              | 3886              | 32999            | 29587            | 15873             | 3076              | 41445             | 10                | 592  | 1654              |    |
| 2006 | 370640           | 215710           | 21765            | 68769            | 54926            | 3043             | 991              | 28187            | 37008            | 1020              | 154930            | 30845            | 2391             | 289              | 3783              | 29890            | 29535            | 13598             | 2531              | 39854             | 8                 | 593  | 1614              |    |
| 2007 | 335768           | 190082           | 16693            | 62110            | 48824            | 2760             | 840              | 24242            | 33444            | 868               | 145686            | 29161            | 2429             | 310              | 3768              | 36846            | 29289            | 11489             | 2726              | 37421             | 4                 | 616  | 1627              |    |
| 2008 | 303084           | 166097           | 14002            | 54070            | 42768            | 2826             | 703              | 21796            | 29229            | 703               | 136987            | 27648            | 2385             | 357              | 3895              | 24830            | 27150            | 9794              | 3270              | 35438             | 5                 | 598  | 1618              |    |
| 2009 | 274052           | 146867           | 11764            | 47749            | 37940            | 2791             | 475              | 19589            | 26002            | 557               | 127185            | 25665            | 2491             | 323              | 3825              | 23965            | 26373            | 8682              | 1479              | 32243             | 2                 | 517  | 1619              |    |
| 2010 | 251554           | 131241           | 10157            | 42521            | 32887            | 2797             | 253              | 17966            | 24059            | 601               | 120313            | 23164            | 2730             | 975              | 3612              | 24024            | 25570            | 7370              | 834               | 29946             | 4                 | 449  | 1634              |    |
| 2011 | 233813           | 120859           | 9678             | 38219            | 28946            | 2912             | 109              | 17315            | 22979            | 701               | 112954            | 20692            | 2981             | 1818             | 3247              | 23705            | 23680            | 6481              | 477               | 27807             | 8                 | 410  | 1649              |    |
| 2012 | 219549           | 113103           | 9326             | 35197            | 25645            | 2864             | 51               | 16849            | 22273            | 898               | 106446            | 18722            | 3210             | 2702             | 2803              | 22760            | 21686            | 5863              | 322               | 26330             | 3                 | 380  | 1664              |    |
| 2013 | 205470           | 105373           | 8985             | 32024            | 22527            | 2833             | 19               | 16471            | 21356            | 1157              | 100097            | 17229            | 3562             | 3947             | 2402              | 21430            | 19508            | 5111              | 569               | 24354             | 6                 | 414  | 1565              |    |
| 2014 | 193048           | 100075           | 8667             | 29893            | 21305            | 2808             | 10               | 16028            | 20154            | 1210              | 92973             | 15660            | 3375             | 4258             | 2116              | 19860            | 17987            | 4618              | 523               | 22721             | 4                 | 400  | 1453              |    |
| 2015 | 181574           | 93435            | 8092             | 27910            | 19891            | 2622             | 9                | 14965            | 18816            | 1130              | 88139             | 14862            | 3201             | 4037             | 2005              | 18826            | 17069            | 4383              | 491               | 21503             | 3                 | 379  | 1378              |    |
| 2000 | 23970            | 10615            | 615              | 4292             | 2544             | 1056             | 100              | 701              | 1254             | 53                | 13355             | 4037             | 400              | 162              | 835               | 3298             | 496              | 2777              | 7                 | 1298              | 0                 | 2    | 43                |    |
| 2001 | 20313            | 9475             | 536              | 3650             | 2234             | 1077             | 62               | 659              | 1218             | 38                | 10838             | 2234             | 3298             | 329              | 133               | 689              | 2692             | 414               | 2120              | 7                 | 1112              | 0    | 2                 | 41 |
| 2002 | 17294            | 8512             | 468              | 3167             | 1957             | 1052             | 42               | 607              | 1191             | 28                | 8782              | 2687             | 271              | 109              | 566               | 2189             | 345              | 1615              | 7                 | 951               | 0                 | 2    | 40                |    |
| 2003 | 15040            | 7771             | 417              | 2844             | 1747             | 981              | 31               | 553              | 1175             | 22                | 7269              | 2235             | 227              | 91               | 472               | 1816             | 293              | 1262              | 7                 | 824               | 0                 | 3    | 40                |    |
| 2004 | 13495            | 7228             | 381              | 2624             | 1594             | 922              | 25               | 509              | 1154             | 19                | 6267              | 1934             | 199              | 79               | 408               | 1569             | 258              | 1036              | 8                 | 734               | 0                 | 3    | 39                |    |
| 2005 | 12607            | 6793             | 355              | 2471             | 1481             | 860              | 22               | 470              | 1117             | 16                | 5814              | 1801             | 186              | 74               | 380               | 1460             | 244              | 926               | 8                 | 695               | 0                 | 3    | 38                |    |
| 2006 | 12177            | 6530             | 339              | 2385             | 1414             | 828              | 21               | 447              | 1080             | 15                | 5647              | 1755             | 182              | 73               | 371               | 1426             | 241              | 874               | 8                 | 679               | 0                 | 3    | 35                |    |
| 2007 | 11886            | 6308             | 327              | 2311             | 1363             | 802              | 20               | 430              | 1039             | 15                | 5578              | 1740             | 180              | 73               | 369               | 1417             | 240              | 844               | 8                 | 673               | 0                 | 3    | 33                |    |
| 2008 | 11469            | 6101             | 315              | 2237             | 1316             | 779              | 20               | 416              | 1004             | 14                | 5368              | 1683             | 174              | 71               | 357               | 1372             | 233              | 793               | 0                 | 651               | 0                 | 3    | 31                |    |
| 2009 | 11037            | 5845             | 301              | 2139             | 1258             | 750              | 18               | 398              | 967              | 13                | 5192              | 1634             | 168              | 70               | 347               | 1333             | 226              | 747               | 0                 | 633               | 0                 | 3    | 30                |    |
| 2010 | 10613            | 5635             | 289              | 2054             | 1210             | 725              | 17               | 384              | 944              | 12                | 4978              | 1573             | 161              | 67               | 334               | 1284             | 217              | 695               | 0                 | 613               | 0                 | 4    | 29                |    |
| 2011 | 10240            | 5461             | 279              | 1976             | 1168             | 705              | 16               | 374              | 931              | 12                | 4779              | 1516             | 155              | 65               | 321               | 1237             | 208              | 647               | 0                 | 597               | 0                 | 4    | 29                |    |
| 2012 | 9966             | 5376             | 273              | 1932             | 1145             | 695              | 15               | 368              | 938              | 11                | 4590              | 1385             | 155              | 66               | 274               | 1238             | 208              | 624               | 0                 | 605               | 0                 | 4    | 31                |    |
| 2013 | 9798             | 5321             | 269              | 1902             | 1128             | 686              | 14               | 364              | 948              | 10                | 4477              | 1207             | 163              | 69               | 196               | 1309             | 220              | 634               | 0                 | 645               | 0                 | 4    | 30                |    |
| 2014 | 9577             | 5227             | 263              | 1859             | 1103             | 671              | 13               | 356              | 952              | 10                | 4350              | 1177             | 159              | 68               | 191               | 1277             | 214              | 595               | 0                 | 636               | 0                 | 4    | 29                |    |
| 2015 | 9271             | 5091             | 255              | 1801             | 1070             | 652              | 12               | 345              | 946              | 9                 | 4180              | 1135             | 153              | 65               | 184               | 1232             | 206              | 553               | 0                 | 620               | 0                 | 4    | 28                |    |
| 2000 | 3029             | 1234             | 72               | 512              | 286              | 131              | 11               | 76               | 140              | 6                 | 1795              | 524              | 41               | 50               | 82                | 426              | 116              | 364               | 17                | 166               | 0                 | 0    | 9                 |    |
| 2001 | 2790             | 1172             | 68               | 481              | 270              | 127              | 9                | 72               | 140              | 5                 | 1618              | 469              | 37               | 45               | 73                | 381              | 108              | 310               | 34                | 152               | 0                 | 0    | 9                 |    |
| 2002 | 2547             | 1103             | 63               | 446              | 252              | 122              | 8                | 68               | 139              | 4                 | 1444              | 416              | 34               | 41               | 64                | 339              | 101              | 263               | 40                | 138               | 0                 | 0    | 8                 |    |
| 2003 | 2325             | 1032             | 58               | 410              | 235              | 116              | 6                | 64               | 137              | 4                 | 1293              | 380              | 31               | 38               | 58                | 308              | 96               | 229               | 15                | 129               | 0                 | 0    | 8                 |    |
| 2004 | 2158             | 984              | 55               | 383              | 224              | 113              | 6                | 62               | 138              | 3                 | 1174              | 347              | 29               | 35               | 52                | 281              | 92               | 200               | 8                 | 121               | 0                 | 0    | 8                 |    |
| 2005 | 2053             | 962              | 54               | 366              | 219              | 113              | 5                | 61               | 142              | 3                 | 1091              | 308              | 28               | 35               | 42                | 270              | 92               | 184               | 5                 | 119               | 0                 | 0    | 8                 |    |
| 2006 | 2006             | 974              | 54               | 361              | 222              | 116              | 4                | 63               | 151              | 3                 | 1032              | 277              | 28               | 34               | 35                | 262              | 94               | 171               | 4                 | 118               | 0                 | 0    | 9                 |    |
| 2007 | 1994             | 995              | 54               | 360              | 227              | 121              | 4                | 66               | 161              | 3                 | 999               | 256              | 28               | 34               | 29                | 259              | 96               | 162               | 3                 | 120               | 0                 | 0    | 10                |    |
| 2008 | 1997             | 1018             | 55               | 359              | 232              | 125              | 4                | 68               | 172              | 2                 | 979               | 242              | 29               | 35               | 26                | 259              | 100              | 155               | 2                 | 122               | 0                 | 0    | 10                |    |
| 2009 | 1985             | 1015             | 55               | 350              | 231              | 127              | 3                | 69               | 179              | 2                 | 970               | 240              | 29               | 35               | 25                | 256              | 101              | 148               | 2                 | 124               | 0                 | 0    | 11                |    |
| 2010 |                  |                  |                  |                  |                  |                  |                  |                  |                  |                   |                   |                  |                  |                  |                   |                  |                  |                   |                   |                   |                   |      |                   |    |



Webappendix 6. Estimated numbers of deaths by cause in neonates, children aged 1-59 months at the global, regional and country levels in 2000-2015

| Year | 0-28 days        |                  |                  |                  |                  |                  |                  |                  |                  |                   | 1-59 months       |                  |                  |                  |                   |                  |                  |                   |                   |                   |                   |      |                   |
|------|------------------|------------------|------------------|------------------|------------------|------------------|------------------|------------------|------------------|-------------------|-------------------|------------------|------------------|------------------|-------------------|------------------|------------------|-------------------|-------------------|-------------------|-------------------|------|-------------------|
|      | USD <sup>1</sup> | NEO <sup>2</sup> | PNE <sup>3</sup> | PRE <sup>4</sup> | INT <sup>5</sup> | SEP <sup>6</sup> | TET <sup>7</sup> | OTH <sup>8</sup> | CON <sup>9</sup> | DIA <sup>10</sup> | POS <sup>11</sup> | PNE <sup>3</sup> | PRE <sup>4</sup> | INT <sup>5</sup> | MEN <sup>12</sup> | OTH <sup>8</sup> | CON <sup>9</sup> | DIA <sup>10</sup> | MEA <sup>13</sup> | INJ <sup>14</sup> | MAL <sup>15</sup> | AIDS | PER <sup>16</sup> |
| 2013 | 13               | 8                | 0                | 4                | 2                | 0                | 0                | 0                | 2                | 0                 | 5                 | 0                | 0                | 0                | 0                 | 3                | 1                | 0                 | 0                 | 0                 | 0                 | 0    | 0                 |
| 2014 | 12               | 8                | 0                | 4                | 2                | 0                | 0                | 0                | 2                | 0                 | 4                 | 0                | 0                | 0                | 0                 | 2                | 1                | 0                 | 0                 | 1                 | 0                 | 0    | 0                 |
| 2015 | 12               | 7                | 0                | 3                | 2                | 0                | 0                | 0                | 2                | 0                 | 5                 | 0                | 0                | 0                | 0                 | 3                | 1                | 0                 | 0                 | 1                 | 0                 | 0    | 0                 |
| 2000 | 14023            | 7807             | 144              | 3601             | 786              | 854              | 0                | 651              | 1770             | 0                 | 6216              | 824              | 295              | 77               | 202               | 1769             | 1566             | 296               | 0                 | 1107              | 0                 | 55   | 25                |
| 2001 | 13841            | 7781             | 146              | 3641             | 695              | 860              | 0                | 598              | 1840             | 0                 | 6060              | 855              | 253              | 50               | 182               | 1716             | 1617             | 325               | 0                 | 1007              | 0                 | 32   | 23                |
| 2002 | 13758            | 7595             | 143              | 3491             | 736              | 1000             | 0                | 466              | 1760             | 0                 | 6163              | 818              | 305              | 58               | 195               | 1961             | 1465             | 357               | 0                 | 934               | 0                 | 56   | 14                |
| 2003 | 13632            | 7341             | 156              | 3356             | 648              | 990              | 0                | 473              | 1718             | 0                 | 6291              | 1265             | 314              | 31               | 220               | 1804             | 1467             | 256               | 0                 | 876               | 0                 | 35   | 23                |
| 2004 | 13367            | 7113             | 115              | 3277             | 623              | 853              | 0                | 484              | 1760             | 0                 | 6254              | 916              | 317              | 40               | 222               | 1927             | 1668             | 200               | 0                 | 902               | 0                 | 27   | 35                |
| 2005 | 12904            | 6965             | 148              | 3216             | 582              | 816              | 0                | 477              | 1726             | 0                 | 5939              | 737              | 335              | 49               | 199               | 1832             | 1653             | 207               | 0                 | 888               | 0                 | 22   | 15                |
| 2006 | 12389            | 6660             | 140              | 3030             | 497              | 716              | 0                | 477              | 1800             | 0                 | 5729              | 784              | 293              | 45               | 191               | 1643             | 1582             | 232               | 0                 | 885               | 0                 | 38   | 36                |
| 2007 | 11854            | 6379             | 125              | 2937             | 527              | 707              | 0                | 455              | 1628             | 0                 | 5475              | 917              | 274              | 40               | 159               | 1664             | 1373             | 138               | 0                 | 816               | 0                 | 21   | 73                |
| 2008 | 11422            | 6001             | 106              | 2781             | 467              | 648              | 0                | 424              | 1574             | 0                 | 5421              | 467              | 285              | 49               | 162               | 1617             | 1553             | 170               | 0                 | 702               | 0                 | 10   | 86                |
| 2009 | 11017            | 5715             | 114              | 2584             | 438              | 587              | 0                | 407              | 1585             | 0                 | 5302              | 962              | 288              | 54               | 157               | 1449             | 1460             | 162               | 0                 | 720               | 0                 | 24   | 26                |
| 2010 | 10681            | 5470             | 112              | 2443             | 415              | 614              | 0                | 373              | 1513             | 0                 | 5211              | 711              | 271              | 108              | 174               | 1489             | 1476             | 188               | 0                 | 756               | 0                 | 10   | 28                |
| 2011 | 10424            | 5273             | 118              | 2365             | 362              | 558              | 0                | 402              | 1468             | 0                 | 5151              | 724              | 365              | 43               | 127               | 1509             | 1390             | 140               | 0                 | 718               | 0                 | 20   | 114               |
| 2012 | 10224            | 5179             | 86               | 2270             | 359              | 529              | 0                | 449              | 1487             | 0                 | 5045              | 599              | 282              | 21               | 138               | 1505             | 1494             | 119               | 0                 | 801               | 0                 | 6    | 58                |
| 2013 | 9973             | 5096             | 74               | 2384             | 369              | 445              | 0                | 458              | 1365             | 0                 | 4877              | 646              | 243              | 48               | 121               | 1523             | 1401             | 136               | 0                 | 731               | 0                 | 13   | 15                |
| 2014 | 9770             | 4923             | 87               | 2223             | 345              | 485              | 0                | 415              | 1368             | 0                 | 4847              | 640              | 285              | 36               | 124               | 1460             | 1379             | 127               | 0                 | 724               | 0                 | 12   | 59                |
| 2015 | 9513             | 4797             | 85               | 2166             | 336              | 472              | 0                | 404              | 1333             | 0                 | 4716              | 623              | 278              | 35               | 121               | 1420             | 1342             | 123               | 0                 | 705               | 0                 | 12   | 58                |
| 2000 | 82               | 44               | 9                | 13               | 9                | 5                | 0                | 2                | 7                | 0                 | 38                | 10               | 3                | 1                | 1                 | 6                | 7                | 1                 | 0                 | 8                 | 0                 | 1    | 0                 |
| 2001 | 79               | 43               | 7                | 15               | 6                | 5                | 0                | 3                | 7                | 0                 | 36                | 8                | 2                | 2                | 1                 | 8                | 5                | 1                 | 0                 | 8                 | 0                 | 1    | 0                 |
| 2002 | 80               | 44               | 7                | 16               | 3                | 7                | 0                | 5                | 6                | 0                 | 36                | 7                | 3                | 3                | 1                 | 9                | 7                | 0                 | 0                 | 6                 | 0                 | 0    | 0                 |
| 2003 | 82               | 45               | 4                | 15               | 7                | 6                | 0                | 5                | 8                | 0                 | 37                | 4                | 1                | 5                | 0                 | 11               | 8                | 1                 | 0                 | 6                 | 0                 | 0    | 0                 |
| 2004 | 85               | 48               | 4                | 14               | 11               | 9                | 0                | 4                | 7                | 0                 | 37                | 3                | 2                | 5                | 0                 | 10               | 10               | 0                 | 0                 | 6                 | 0                 | 0    | 0                 |
| 2005 | 87               | 49               | 5                | 14               | 10               | 10               | 0                | 4                | 6                | 0                 | 38                | 4                | 1                | 3                | 0                 | 9                | 12               | 0                 | 0                 | 8                 | 0                 | 0    | 0                 |
| 2006 | 87               | 50               | 7                | 15               | 7                | 13               | 0                | 4                | 4                | 0                 | 37                | 5                | 1                | 1                | 0                 | 10               | 12               | 0                 | 0                 | 7                 | 0                 | 0    | 0                 |
| 2007 | 87               | 51               | 11               | 15               | 5                | 11               | 0                | 5                | 4                | 0                 | 36                | 7                | 0                | 0                | 0                 | 12               | 12               | 0                 | 0                 | 6                 | 0                 | 0    | 0                 |
| 2008 | 87               | 52               | 13               | 14               | 7                | 7                | 0                | 5                | 5                | 0                 | 35                | 9                | 0                | 0                | 0                 | 15               | 6                | 0                 | 0                 | 5                 | 0                 | 0    | 0                 |
| 2009 | 86               | 51               | 10               | 17               | 7                | 5                | 0                | 5                | 7                | 0                 | 35                | 9                | 0                | 0                | 1                 | 16               | 3                | 0                 | 0                 | 5                 | 0                 | 0    | 0                 |
| 2010 | 85               | 50               | 7                | 21               | 6                | 4                | 0                | 4                | 7                | 0                 | 35                | 8                | 0                | 1                | 1                 | 16               | 1                | 0                 | 0                 | 8                 | 0                 | 1    | 0                 |
| 2011 | 83               | 49               | 3                | 24               | 6                | 3                | 0                | 3                | 9                | 0                 | 34                | 7                | 0                | 1                | 1                 | 16               | 1                | 0                 | 0                 | 7                 | 0                 | 1    | 0                 |
| 2012 | 80               | 46               | 3                | 23               | 6                | 3                | 0                | 4                | 7                | 0                 | 34                | 7                | 0                | 1                | 0                 | 15               | 1                | 1                 | 0                 | 8                 | 0                 | 1    | 0                 |
| 2013 | 76               | 44               | 4                | 21               | 6                | 2                | 0                | 3                | 8                | 0                 | 32                | 8                | 0                | 1                | 0                 | 15               | 1                | 1                 | 0                 | 6                 | 0                 | 0    | 0                 |
| 2014 | 73               | 42               | 3                | 21               | 5                | 3                | 0                | 3                | 7                | 0                 | 31                | 7                | 0                | 1                | 0                 | 14               | 1                | 0                 | 0                 | 7                 | 0                 | 1    | 0                 |
| 2015 | 70               | 40               | 3                | 20               | 5                | 3                | 0                | 3                | 7                | 0                 | 30                | 6                | 0                | 1                | 0                 | 14               | 1                | 0                 | 0                 | 7                 | 0                 | 1    | 0                 |
| 2000 | 58               | 30               | 0                | 18               | 8                | 0                | 0                | 2                | 2                | 0                 | 28                | 0                | 3                | 3                | 2                 | 11               | 3                | 0                 | 0                 | 3                 | 0                 | 3    | 0                 |
| 2001 | 59               | 31               | 0                | 16               | 8                | 1                | 0                | 2                | 4                | 0                 | 28                | 1                | 4                | 2                | 1                 | 9                | 5                | 0                 | 0                 | 3                 | 0                 | 3    | 0                 |
| 2002 | 60               | 33               | 0                | 17               | 6                | 2                | 0                | 3                | 4                | 0                 | 27                | 2                | 2                | 3                | 1                 | 8                | 4                | 0                 | 0                 | 5                 | 0                 | 3    | 0                 |
| 2003 | 61               | 34               | 0                | 12               | 9                | 4                | 0                | 3                | 5                | 0                 | 27                | 2                | 3                | 3                | 0                 | 7                | 5                | 0                 | 0                 | 6                 | 0                 | 1    | 0                 |
| 2004 | 61               | 36               | 1                | 13               | 9                | 4                | 0                | 2                | 7                | 0                 | 25                | 2                | 2                | 3                | 0                 | 8                | 3                | 1                 | 0                 | 6                 | 0                 | 1    | 0                 |
| 2005 | 60               | 36               | 1                | 13               | 9                | 5                | 0                | 2                | 7                | 0                 | 24                | 2                | 2                | 1                | 0                 | 11               | 3                | 1                 | 0                 | 4                 | 0                 | 0    | 0                 |
| 2006 | 59               | 36               | 1                | 12               | 8                | 6                | 0                | 3                | 6                | 0                 | 23                | 4                | 1                | 0                | 0                 | 13               | 3                | 1                 | 0                 | 2                 | 0                 | 0    | 0                 |
| 2007 | 56               | 35               | 0                | 10               | 9                | 6                | 0                | 4                | 5                | 0                 | 21                | 3                | 1                | 0                | 0                 | 12               | 3                | 0                 | 0                 | 1                 | 0                 | 0    | 0                 |
| 2008 | 53               | 33               | 0                | 8                | 10               | 4                | 0                | 4                | 7                | 0                 | 20                | 2                | 2                | 0                | 0                 | 12               | 2                | 0                 | 0                 | 2                 | 0                 | 0    | 0                 |
| 2009 | 51               | 31               | 0                | 8                | 8                | 4                | 0                | 3                | 8                | 0                 | 20                | 1                | 2                | 1                | 0                 | 13               | 3                | 0                 | 0                 | 0                 | 0                 | 0    | 0                 |
| 2010 | 49               | 30               | 0                | 8                | 7                | 5                | 0                | 3                | 7                | 0                 | 19                | 1                | 1                | 2                | 0                 | 13               | 1                | 0                 | 0                 | 1                 | 0                 | 0    | 0                 |
| 2011 | 48               | 30               | 0                | 8                | 4                | 7                | 0                | 4                | 7                | 0                 | 18                | 1                | 1                | 2                | 0                 | 9                | 2                | 0                 | 0                 | 2                 | 0                 | 0    | 0                 |
| 2012 | 47               | 29               | 0                | 8                | 4                | 6                | 0                | 5                | 7                | 0                 | 18                | 2                | 1                | 2                | 0                 | 8                | 2                | 0                 | 0                 | 3                 | 0                 | 0    | 0                 |
| 2013 | 46               | 28               | 0                | 8                | 3                | 6                | 0                | 4                | 7                | 0                 | 18                | 1                | 2                | 2                | 0                 | 8                | 2                | 0                 | 0                 | 3                 | 0                 | 0    | 0                 |
| 2014 | 45               | 28               | 0                | 7                | 4                | 6                | 0                | 4                | 7                | 0                 | 17                | 1                | 1                | 2                | 0                 | 9                | 2                | 0                 | 0                 | 2                 | 0                 | 0    | 0                 |
| 2015 | 44               | 27               | 0                | 7                | 4                | 6                | 0                | 4                | 7                | 0                 | 17                | 1                | 1                | 2                | 0                 | 9                | 2                | 0                 | 0                 | 2                 | 0                 | 0    | 0                 |
| 2000 | 191              | 96               | 1                | 46               | 19               | 7                | 0                | 1                | 22               | 0                 | 95                | 23               | 5                | 1                | 6                 | 14               | 11               | 9                 | 0                 | 24                | 0                 | 3    | 0                 |
| 2001 | 187              | 94               | 1                | 38               | 20               | 11               | 0                | 4                | 20               | 0                 | 93                | 17               | 0                | 2                | 6                 | 30               | 12               | 8                 | 0                 | 16                | 0                 | 2    | 0                 |
| 2002 | 181              | 91               | 1                | 30               | 26               | 12               | 0                | 7                | 15               | 0                 | 90                | 27               | 2                | 0                | 9                 | 27               | 10               | 3                 | 0                 | 13                | 0                 | 0    | 0                 |
| 2003 | 175              | 87               | 5                | 38               | 10               | 12               | 0                | 4                | 19               | 0                 | 88                | 21               | 0                | 0                | 2                 | 21               | 3                | 12                | 0                 | 19                | 0                 | 11   | 0                 |
| 2004 | 169              | 84               | 3                | 27               | 22               | 8                | 0                | 8                | 18               | 0                 | 85                | 21               | 1                | 0                | 5                 | 16               | 12               | 10                | 0                 | 13                | 0                 | 6    | 0                 |
| 2005 | 163              | 82               | 3                | 41               | 17               | 5                | 0                | 3                | 12               | 0                 | 81                | 11               | 2                | 0                | 0                 | 20               | 13               | 12                | 0                 | 16                | 0                 | 6    | 0                 |
| 2006 | 158              | 79               | 5                | 23               | 16               | 7                | 0                | 11               | 16               | 0                 | 79                | 21               | 0                | 0                | 1                 | 15               | 8                | 10                | 0                 | 19                | 0                 | 4    | 0                 |
| 2007 | 152              | 76               | 7                | 21               | 16               | 9                | 0                | 10               | 13               | 0                 | 76                | 4                | 3                | 0                | 3                 | 21               | 19               | 11                | 0                 | 11                | 0                 | 4    | 0                 |
| 2008 | 148              | 74               | 6                | 22               | 14               | 9                | 0                | 9                | 15               | 0                 | 74                | 6                | 0                | 0                | 0                 | 40               | 7                | 9                 | 0                 | 13                | 0                 | 0    | 0                 |
| 2009 | 144              | 72               | 4                | 23               | 12               | 8                | 0                | 8                | 15               | 0                 | 72                | 7                | 0                | 0                | 0                 | 37               | 7                | 5                 | 0                 | 14                | 0                 | 2    | 0                 |
| 2010 | 141              | 71               | 3                | 24               | 11               | 8                | 0                | 7                | 17               | 0                 | 70                | 9                | 1                | 0                | 2                 | 25               | 14               | 6                 | 0                 | 11                | 0                 | 2    | 0                 |
| 2011 | 140              | 71               | 3                | 26               | 10               | 8                | 0                | 7                | 18               | 0                 | 69                | 2                | 0                | 0                | 0                 | 27               | 21               | 9                 | 0                 | 6                 | 0                 | 4    | 0                 |
| 2012 | 139              | 71               | 2                | 23               | 17               | 12               | 0                | 6                | 12               | 0                 | 68                | 19               | 0                | 2                | 2                 | 20               | 13               | 4                 | 0                 | 9                 | 0                 | 0    | 0                 |
| 2013 | 140              | 71               | 3                | 20               | 5                | 12               | 0                | 12               | 18               | 0                 | 69                | 7                | 3                | 0                | 4                 | 24               | 19               | 1                 | 0                 | 11                | 0                 | 1    | 0                 |
| 2014 | 139              | 71               | 2                | 23               | 11               | 11               | 0                | 8                | 16               | 0                 | 68                | 9                | 1                | 1                | 2                 | 23               | 17               | 4                 | 0                 | 9                 | 0                 | 2    | 0                 |
| 2015 | 138              | 70               | 2                | 23               | 10               | 10               | 0                | 8                | 16               | 0                 | 68                | 9                | 1                | 1                | 2                 | 23               | 17               | 4                 | 0                 | 9                 | 0                 | 2    | 0                 |
| 2000 | 20137            | 7571             | 518              | 2296             | 2273             | 1062             | 132              | 578              | 651              | 60                | 12566             | 3226             | 387              | 380              | 397               | 2494             | 1141             | 3049              | 0                 | 1164              | 6                 | 29   | 292               |
| 2001 | 19162            | 7335             | 496              | 2231             | 2181             | 1035             | 116              | 561              | 662              | 54                | 11827             | 3042             | 371              | 362              | 376               | 2359             | 1113             | 2751              | 0                 | 1121              | 3                 | 33   | 296               |
| 2002 | 18132            | 7163             | 479              | 2193             | 2107             | 1005             | 105              | 546              | 678              | 49                | 10969             | 2828             | 349              | 339              | 351               | 2203             | 1059             | 2446              | 0                 | 1064              | 2                 | 37   | 291               |
| 2003 | 17148            | 7035             | 465              | 2175             | 2042             | 977              | 98               | 534              | 697              |                   |                   |                  |                  |                  |                   |                  |                  |                   |                   |                   |                   |      |                   |

Webappendix 6. Estimated numbers of deaths by cause in neonates, children aged 1-59 months at the global, regional and country levels in 2000-2015

| Year | USD <sup>1</sup> | 0-28 days        |                  |                  |                  |                  |                  |                  |                  |                   |                   | 1-59 months      |                  |                  |                   |                  |                  |                   |                   |                   |                   |      |                   |
|------|------------------|------------------|------------------|------------------|------------------|------------------|------------------|------------------|------------------|-------------------|-------------------|------------------|------------------|------------------|-------------------|------------------|------------------|-------------------|-------------------|-------------------|-------------------|------|-------------------|
|      |                  | NEO <sup>2</sup> | PNE <sup>3</sup> | PRE <sup>4</sup> | INT <sup>5</sup> | SEP <sup>6</sup> | TET <sup>7</sup> | OTH <sup>8</sup> | CON <sup>9</sup> | DIA <sup>10</sup> | POS <sup>11</sup> | PNE <sup>3</sup> | PRE <sup>4</sup> | INT <sup>5</sup> | MEN <sup>12</sup> | OTH <sup>8</sup> | CON <sup>9</sup> | DIA <sup>10</sup> | MEA <sup>13</sup> | INJ <sup>14</sup> | MAL <sup>15</sup> | AIDS | PER <sup>16</sup> |
| 2008 | 2150             | 1326             | 18               | 565              | 77               | 68               | 0                | 120              | 478              | 0                 | 824               | 105              | 48               | 8                | 25                | 206              | 279              | 10                | 0                 | 132               | 0                 | 4    | 8                 |
| 2009 | 2114             | 1319             | 22               | 543              | 70               | 71               | 0                | 104              | 510              | 0                 | 795               | 101              | 44               | 7                | 19                | 192              | 290              | 6                 | 0                 | 126               | 0                 | 2    | 6                 |
| 2010 | 2104             | 1289             | 12               | 546              | 81               | 67               | 0                | 112              | 470              | 0                 | 815               | 76               | 51               | 8                | 32                | 196              | 298              | 4                 | 0                 | 135               | 0                 | 7    | 7                 |
| 2011 | 2070             | 1282             | 28               | 527              | 83               | 71               | 0                | 83               | 488              | 0                 | 788               | 48               | 47               | 9                | 19                | 203              | 341              | 1                 | 0                 | 105               | 0                 | 1    | 13                |
| 2012 | 2036             | 1252             | 11               | 499              | 83               | 60               | 0                | 113              | 486              | 0                 | 784               | 49               | 46               | 4                | 23                | 203              | 320              | 0                 | 0                 | 124               | 0                 | 1    | 14                |
| 2013 | 1979             | 1223             | 18               | 487              | 62               | 39               | 0                | 107              | 510              | 0                 | 756               | 57               | 37               | 16               | 11                | 217              | 280              | 3                 | 0                 | 131               | 0                 | 0    | 5                 |
| 2014 | 1948             | 1195             | 18               | 481              | 72               | 54               | 0                | 97               | 472              | 0                 | 753               | 50               | 42               | 9                | 17                | 202              | 304              | 1                 | 0                 | 117               | 0                 | 1    | 10                |
| 2015 | 1896             | 1144             | 17               | 461              | 69               | 52               | 0                | 93               | 452              | 0                 | 752               | 50               | 42               | 9                | 17                | 201              | 304              | 1                 | 0                 | 116               | 0                 | 1    | 10                |
| 2000 | 20708            | 11036            | 481              | 4820             | 1719             | 1124             | 2                | 1017             | 1874             | 0                 | 9672              | 2151             | 173              | 92               | 378               | 2895             | 1281             | 1262              | 0                 | 1268              | 99                | 42   | 31                |
| 2001 | 20045            | 10742            | 393              | 4449             | 1451             | 1424             | 3                | 1083             | 1940             | 0                 | 9303              | 1870             | 154              | 54               | 352               | 3194             | 1321             | 839               | 0                 | 1285              | 138               | 45   | 52                |
| 2002 | 19658            | 10548            | 462              | 4431             | 1407             | 1064             | 6                | 1104             | 2073             | 0                 | 9110              | 1476             | 189              | 63               | 354               | 2831             | 1415             | 1157              | 0                 | 1436              | 118               | 44   | 27                |
| 2003 | 19340            | 10386            | 408              | 4119             | 1521             | 1039             | 6                | 1114             | 2180             | 0                 | 8954              | 1590             | 169              | 58               | 345               | 2743             | 1396             | 1213              | 0                 | 1260              | 99                | 68   | 12                |
| 2004 | 18941            | 10255            | 437              | 3519             | 1406             | 1532             | 1                | 1117             | 2242             | 0                 | 8686              | 1611             | 141              | 56               | 319               | 2702             | 1481             | 988               | 0                 | 1242              | 69                | 68   | 10                |
| 2005 | 18364            | 10016            | 406              | 3754             | 1269             | 1435             | 3                | 1044             | 2106             | 0                 | 8348              | 1567             | 200              | 33               | 353               | 2627             | 1367             | 831               | 0                 | 1226              | 54                | 59   | 31                |
| 2006 | 17686            | 9644             | 442              | 3452             | 1173             | 1245             | 3                | 1078             | 2252             | 0                 | 8042              | 1637             | 165              | 56               | 335               | 2397             | 1403             | 706               | 0                 | 1224              | 58                | 46   | 14                |
| 2007 | 16853            | 9105             | 367              | 3005             | 1184             | 1301             | 0                | 1118             | 2130             | 0                 | 7748              | 1518             | 166              | 63               | 245               | 2338             | 1398             | 722               | 0                 | 1173              | 64                | 52   | 9                 |
| 2008 | 15943            | 8614             | 308              | 3087             | 1160             | 1020             | 1                | 1004             | 2033             | 0                 | 7329              | 1309             | 206              | 98               | 227               | 2259             | 1592             | 489               | 0                 | 1079              | 29                | 26   | 16                |
| 2009 | 15070            | 8146             | 328              | 2871             | 999              | 1007             | 0                | 1009             | 1932             | 0                 | 6924              | 1230             | 230              | 95               | 226               | 2234             | 1370             | 477               | 0                 | 979               | 28                | 37   | 17                |
| 2010 | 14307            | 7667             | 256              | 2676             | 730              | 857              | 2                | 1032             | 2115             | 0                 | 6640              | 1116             | 323              | 86               | 184               | 2160             | 1434             | 347               | 0                 | 912               | 46                | 30   | 2                 |
| 2011 | 13743            | 7346             | 272              | 2619             | 733              | 1028             | 0                | 742              | 1953             | 0                 | 6397              | 1148             | 348              | 115              | 165               | 1965             | 1425             | 274               | 0                 | 882               | 20                | 28   | 26                |
| 2012 | 13190            | 7076             | 303              | 2370             | 564              | 1111             | 0                | 760              | 1968             | 0                 | 6114              | 1083             | 345              | 149              | 124               | 1944             | 1338             | 241               | 0                 | 775               | 21                | 23   | 72                |
| 2013 | 12772            | 6837             | 258              | 2371             | 626              | 930              | 0                | 782              | 1869             | 0                 | 5935              | 1039             | 316              | 109              | 147               | 1883             | 1302             | 267               | 0                 | 796               | 21                | 25   | 31                |
| 2014 | 12364            | 6603             | 249              | 2290             | 605              | 898              | 0                | 755              | 1805             | 0                 | 5761              | 1009             | 307              | 106              | 142               | 1828             | 1265             | 259               | 0                 | 773               | 18                | 24   | 31                |
| 2015 | 11934            | 6356             | 240              | 2204             | 582              | 865              | 0                | 727              | 1738             | 0                 | 5578              | 977              | 297              | 103              | 138               | 1771             | 1225             | 251               | 0                 | 749               | 16                | 23   | 30                |
| 2000 | 1022             | 603              | 19               | 227              | 71               | 42               | 0                | 34               | 210              | 0                 | 419               | 55               | 24               | 5                | 9                 | 132              | 114              | 36                | 0                 | 41                | 0                 | 2    | 1                 |
| 2001 | 938              | 566              | 23               | 220              | 58               | 49               | 0                | 32               | 184              | 0                 | 372               | 45               | 16               | 4                | 7                 | 102              | 113              | 26                | 0                 | 52                | 0                 | 2    | 4                 |
| 2002 | 866              | 533              | 21               | 244              | 43               | 30               | 0                | 34               | 160              | 0                 | 333               | 39               | 16               | 1                | 14                | 94               | 107              | 15                | 0                 | 45                | 0                 | 0    | 1                 |
| 2003 | 795              | 508              | 23               | 217              | 51               | 35               | 0                | 30               | 151              | 0                 | 287               | 33               | 8                | 3                | 5                 | 64               | 103              | 22                | 0                 | 49                | 0                 | 0    | 1                 |
| 2004 | 754              | 488              | 16               | 202              | 45               | 33               | 0                | 30               | 163              | 0                 | 266               | 32               | 6                | 2                | 3                 | 95               | 70               | 17                | 0                 | 40                | 0                 | 0    | 1                 |
| 2005 | 724              | 483              | 12               | 185              | 52               | 29               | 0                | 30               | 176              | 0                 | 241               | 40               | 10               | 6                | 7                 | 53               | 76               | 15                | 0                 | 34                | 0                 | 1    | 1                 |
| 2006 | 721              | 481              | 18               | 178              | 66               | 47               | 0                | 29               | 142              | 0                 | 240               | 22               | 11               | 4                | 6                 | 84               | 79               | 9                 | 0                 | 20                | 0                 | 0    | 6                 |
| 2007 | 736              | 486              | 12               | 202              | 47               | 40               | 0                | 20               | 165              | 0                 | 250               | 30               | 15               | 1                | 6                 | 54               | 91               | 13                | 0                 | 34                | 0                 | 1    | 5                 |
| 2008 | 757              | 494              | 14               | 188              | 58               | 40               | 0                | 41               | 152              | 0                 | 263               | 19               | 14               | 3                | 9                 | 77               | 96               | 8                 | 0                 | 30                | 0                 | 0    | 5                 |
| 2009 | 766              | 498              | 6                | 183              | 64               | 13               | 0                | 25               | 206              | 0                 | 268               | 19               | 9                | 4                | 7                 | 84               | 104              | 11                | 0                 | 29                | 0                 | 0    | 1                 |
| 2010 | 772              | 503              | 11               | 188              | 61               | 13               | 0                | 23               | 207              | 0                 | 269               | 23               | 14               | 3                | 7                 | 82               | 100              | 9                 | 0                 | 29                | 0                 | 0    | 2                 |
| 2011 | 760              | 491              | 15               | 187              | 57               | 12               | 0                | 19               | 200              | 0                 | 269               | 22               | 15               | 2                | 7                 | 83               | 102              | 8                 | 0                 | 28                | 0                 | 0    | 2                 |
| 2012 | 745              | 480              | 19               | 187              | 53               | 11               | 0                | 16               | 194              | 0                 | 265               | 15               | 13               | 4                | 8                 | 83               | 105              | 12                | 0                 | 25                | 0                 | 0    | 0                 |
| 2013 | 717              | 458              | 10               | 197              | 54               | 11               | 0                | 18               | 167              | 0                 | 259               | 28               | 20               | 1                | 5                 | 82               | 93               | 3                 | 0                 | 26                | 0                 | 0    | 0                 |
| 2014 | 690              | 437              | 14               | 175              | 50               | 11               | 0                | 16               | 172              | 0                 | 253               | 21               | 16               | 2                | 7                 | 79               | 96               | 7                 | 0                 | 25                | 0                 | 0    | 0                 |
| 2015 | 663              | 421              | 13               | 169              | 48               | 10               | 0                | 16               | 165              | 0                 | 242               | 20               | 15               | 2                | 6                 | 76               | 92               | 7                 | 0                 | 24                | 0                 | 0    | 0                 |
| 2000 | 1292             | 650              | 20               | 198              | 137              | 85               | 0                | 42               | 168              | 0                 | 642               | 61               | 15               | 10               | 47                | 202              | 187              | 19                | 0                 | 101               | 0                 | 0    | 0                 |
| 2001 | 1220             | 627              | 52               | 155              | 123              | 69               | 0                | 64               | 164              | 0                 | 593               | 61               | 20               | 6                | 35                | 176              | 174              | 20                | 0                 | 101               | 0                 | 0    | 0                 |
| 2002 | 1143             | 593              | 62               | 138              | 104              | 70               | 0                | 62               | 158              | 0                 | 550               | 52               | 13               | 8                | 18                | 163              | 178              | 13                | 0                 | 102               | 0                 | 2    | 0                 |
| 2003 | 1055             | 538              | 54               | 137              | 86               | 66               | 0                | 54               | 143              | 0                 | 517               | 48               | 20               | 13               | 27                | 167              | 132              | 16                | 0                 | 93                | 0                 | 1    | 0                 |
| 2004 | 970              | 485              | 51               | 111              | 96               | 62               | 0                | 40               | 124              | 0                 | 485               | 42               | 10               | 11               | 21                | 163              | 148              | 12                | 0                 | 77                | 0                 | 2    | 0                 |
| 2005 | 896              | 440              | 34               | 108              | 53               | 62               | 0                | 62               | 120              | 0                 | 456               | 54               | 11               | 7                | 26                | 149              | 128              | 19                | 0                 | 62                | 0                 | 0    | 0                 |
| 2006 | 845              | 402              | 32               | 116              | 59               | 50               | 0                | 45               | 100              | 0                 | 443               | 57               | 22               | 9                | 21                | 142              | 106              | 14                | 0                 | 72                | 0                 | 0    | 0                 |
| 2007 | 801              | 381              | 39               | 97               | 42               | 70               | 0                | 49               | 84               | 0                 | 420               | 47               | 19               | 9                | 16                | 140              | 115              | 11                | 0                 | 60                | 0                 | 1    | 0                 |
| 2008 | 777              | 351              | 34               | 101              | 47               | 51               | 0                | 49               | 70               | 0                 | 426               | 39               | 17               | 18               | 21                | 148              | 99               | 16                | 0                 | 68                | 0                 | 1    | 0                 |
| 2009 | 756              | 336              | 41               | 97               | 50               | 47               | 0                | 23               | 78               | 0                 | 420               | 66               | 15               | 17               | 13                | 146              | 99               | 11                | 0                 | 54                | 0                 | 0    | 0                 |
| 2010 | 736              | 322              | 28               | 95               | 52               | 48               | 0                | 37               | 61               | 0                 | 414               | 47               | 16               | 16               | 14                | 145              | 112              | 12                | 0                 | 52                | 0                 | 0    | 0                 |
| 2011 | 718              | 309              | 26               | 92               | 47               | 44               | 0                | 37               | 63               | 0                 | 409               | 50               | 15               | 17               | 20                | 147              | 106              | 8                 | 0                 | 45                | 0                 | 0    | 0                 |
| 2012 | 693              | 297              | 23               | 98               | 37               | 24               | 0                | 30               | 85               | 0                 | 396               | 56               | 35               | 12               | 22                | 114              | 88               | 9                 | 0                 | 59                | 0                 | 0    | 0                 |
| 2013 | 680              | 285              | 21               | 93               | 43               | 34               | 0                | 41               | 53               | 0                 | 395               | 56               | 21               | 7                | 15                | 125              | 97               | 10                | 0                 | 62                | 0                 | 1    | 0                 |
| 2014 | 665              | 284              | 23               | 90               | 40               | 32               | 0                | 34               | 64               | 0                 | 381               | 51               | 23               | 12               | 18                | 123              | 92               | 9                 | 0                 | 53                | 0                 | 0    | 0                 |
| 2015 | 647              | 270              | 22               | 86               | 38               | 31               | 0                | 33               | 61               | 0                 | 377               | 51               | 23               | 12               | 18                | 121              | 91               | 8                 | 0                 | 53                | 0                 | 0    | 0                 |
| 2000 | 16               | 12               | 0                | 7                | 1                | 1                | 0                | 1                | 2                | 0                 | 4                 | 0                | 0                | 0                | 0                 | 1                | 1                | 0                 | 0                 | 0                 | 0                 | 0    | 0                 |
| 2001 | 15               | 10               | 0                | 7                | 1                | 0                | 0                | 0                | 1                | 0                 | 5                 | 0                | 0                | 0                | 0                 | 2                | 1                | 0                 | 0                 | 0                 | 0                 | 0    | 0                 |
| 2002 | 14               | 10               | 0                | 7                | 1                | 0                | 0                | 1                | 1                | 0                 | 4                 | 0                | 0                | 0                | 0                 | 2                | 1                | 0                 | 0                 | 0                 | 0                 | 0    | 0                 |
| 2003 | 14               | 10               | 0                | 7                | 2                | 0                | 0                | 1                | 0                | 0                 | 4                 | 0                | 0                | 0                | 0                 | 3                | 1                | 0                 | 0                 | 0                 | 0                 | 0    | 0                 |
| 2004 | 14               | 10               | 0                | 5                | 2                | 1                | 0                | 1                | 2                | 0                 | 4                 | 0                | 0                | 0                | 0                 | 3                | 0                | 0                 | 0                 | 0                 | 0                 | 0    | 0                 |
| 2005 | 15               | 11               | 0                | 6                | 1                | 1                | 0                | 1                | 2                | 0                 | 4                 | 1                | 0                | 0                | 0                 | 2                | 1                | 0                 | 0                 | 0                 | 0                 | 0    | 0                 |
| 2006 | 15               | 11               | 1                | 6                | 0                | 2                | 0                | 1                | 2                | 0                 | 4                 | 1                | 0                | 0                | 0                 | 2                | 1                | 0                 | 0                 | 0                 | 0                 | 0    | 0                 |
| 2007 | 16               | 12               | 1                | 6                | 2                | 1                | 0                | 0                | 2                | 0                 | 4                 | 1                | 0                | 0                | 0                 | 2                | 1                | 0                 | 0                 | 0                 | 0                 | 0    | 0                 |
| 2008 | 17               | 13               | 1                | 4                | 2                | 4                | 0                | 0                | 2                | 0                 | 4                 | 1                | 0                | 0                | 0                 | 2                | 1                | 0                 | 0                 | 0                 | 0                 | 0    | 0                 |
| 2009 | 18               | 14               | 0                | 3                | 6                | 4                | 0                | 0                | 1                | 0                 | 4                 | 1                | 0                | 0                | 0                 | 2                | 1                | 0                 | 0                 | 0                 | 0                 | 0    | 0                 |
| 2010 | 20               | 15               | 0                | 2                | 4                | 6                | 0                | 1                | 2                | 0                 | 5                 | 0                | 0                | 0                | 0                 | 2                | 2                | 0                 | 0                 | 1                 | 0                 | 0    | 0                 |
| 2011 | 21               | 16               |                  |                  |                  |                  |                  |                  |                  |                   |                   |                  |                  |                  |                   |                  |                  |                   |                   |                   |                   |      |                   |

Webappendix 6. Estimated numbers of deaths by cause in neonates, children aged 1-59 months at the global, regional and country levels in 2000-2015

| Year      | 0-28 days        |                  |                  |                  |                  |                  |                  |                  |                  |                   | 1-59 months       |                  |                  |                  |                   |                  |                  |                   |                   |                   |                   |      |                   |     |
|-----------|------------------|------------------|------------------|------------------|------------------|------------------|------------------|------------------|------------------|-------------------|-------------------|------------------|------------------|------------------|-------------------|------------------|------------------|-------------------|-------------------|-------------------|-------------------|------|-------------------|-----|
|           | USD <sup>1</sup> | NEO <sup>2</sup> | PNE <sup>3</sup> | PRE <sup>4</sup> | INT <sup>5</sup> | SEP <sup>6</sup> | TET <sup>7</sup> | OTH <sup>8</sup> | CON <sup>9</sup> | DIA <sup>10</sup> | POS <sup>11</sup> | PNE <sup>3</sup> | PRE <sup>4</sup> | INT <sup>5</sup> | MEN <sup>12</sup> | OTH <sup>8</sup> | CON <sup>9</sup> | DIA <sup>10</sup> | MEA <sup>13</sup> | INJ <sup>14</sup> | MAL <sup>15</sup> | AIDS | PER <sup>16</sup> |     |
| Grenada   | 2003             | 3501             | 1536             | 81               | 589              | 260              | 172              | 15               | 136              | 282               | 0                 | 1965             | 465              | 33               | 13                | 66               | 500              | 337               | 296               | 0                 | 195               | 0    | 39                | 22  |
|           | 2004             | 3216             | 1426             | 78               | 547              | 238              | 152              | 13               | 125              | 273               | 0                 | 1790             | 418              | 33               | 12                | 59               | 452              | 320               | 256               | 0                 | 185               | 0    | 32                | 22  |
|           | 2005             | 2977             | 1331             | 74               | 508              | 218              | 136              | 13               | 117              | 264               | 0                 | 1646             | 382              | 34               | 13                | 54               | 412              | 309               | 218               | 0                 | 177               | 0    | 27                | 21  |
|           | 2006             | 2777             | 1265             | 70               | 481              | 204              | 126              | 13               | 113              | 258               | 0                 | 1512             | 346              | 36               | 13                | 49               | 372              | 297               | 183               | 0                 | 166               | 0    | 29                | 20  |
|           | 2007             | 2633             | 1223             | 67               | 462              | 194              | 119              | 15               | 112              | 254               | 0                 | 1410             | 317              | 37               | 13                | 45               | 342              | 286               | 160               | 0                 | 156               | 0    | 32                | 21  |
|           | 2008             | 2505             | 1187             | 64               | 446              | 185              | 115              | 15               | 112              | 251               | 0                 | 1318             | 289              | 37               | 13                | 41               | 316              | 272               | 148               | 0                 | 146               | 0    | 34                | 22  |
|           | 2009             | 2402             | 1151             | 61               | 431              | 177              | 109              | 15               | 110              | 248               | 0                 | 1251             | 267              | 36               | 13                | 37               | 298              | 257               | 147               | 0                 | 138               | 0    | 35                | 24  |
|           | 2010             | 2291             | 1122             | 59               | 419              | 170              | 104              | 14               | 109              | 246               | 0                 | 1169             | 242              | 35               | 12                | 33               | 275              | 241               | 141               | 0                 | 128               | 0    | 37                | 25  |
|           | 2011             | 2179             | 1071             | 56               | 400              | 161              | 96               | 14               | 105              | 239               | 0                 | 1108             | 224              | 36               | 12                | 31               | 258              | 232               | 132               | 0                 | 122               | 0    | 37                | 25  |
|           | 2012             | 2059             | 1016             | 53               | 379              | 151              | 89               | 13               | 101              | 230               | 0                 | 1043             | 209              | 37               | 13                | 28               | 241              | 225               | 121               | 0                 | 116               | 0    | 29                | 25  |
|           | 2013             | 1949             | 961              | 49               | 358              | 142              | 81               | 12               | 97               | 221               | 0                 | 988              | 196              | 38               | 13                | 26               | 227              | 217               | 111               | 0                 | 111               | 0    | 25                | 24  |
|           | 2014             | 1848             | 910              | 46               | 338              | 134              | 76               | 12               | 93               | 212               | 0                 | 938              | 184              | 39               | 13                | 24               | 215              | 210               | 102               | 0                 | 105               | 0    | 24                | 22  |
|           | 2015             | 1763             | 868              | 42               | 322              | 127              | 71               | 11               | 90               | 205               | 0                 | 895              | 173              | 39               | 13                | 23               | 204              | 203               | 96                | 0                 | 100               | 0    | 23                | 21  |
|           | 2000             | 35               | 17               | 0                | 8                | 5                | 4                | 0                | 0                | 0                 | 0                 | 18               | 3                | 1                | 3                 | 0                | 5                | 1                 | 1                 | 0                 | 3                 | 0    | 0                 | 0   |
|           | 2001             | 34               | 16               | 0                | 9                | 4                | 3                | 0                | 0                | 0                 | 0                 | 18               | 2                | 2                | 5                 | 0                | 4                | 1                 | 1                 | 0                 | 3                 | 0    | 0                 | 0   |
|           | 2002             | 31               | 16               | 0                | 9                | 4                | 3                | 0                | 0                | 1                 | 0                 | 15               | 2                | 2                | 3                 | 0                | 4                | 1                 | 1                 | 0                 | 3                 | 0    | 0                 | 0   |
|           | 2003             | 29               | 15               | 0                | 7                | 5                | 2                | 0                | 1                | 1                 | 0                 | 14               | 1                | 3                | 3                 | 0                | 2                | 3                 | 0                 | 0                 | 3                 | 0    | 0                 | 0   |
|           | 2004             | 27               | 14               | 0                | 4                | 6                | 1                | 0                | 1                | 1                 | 0                 | 13               | 1                | 2                | 1                 | 0                | 2                | 3                 | 0                 | 0                 | 2                 | 0    | 0                 | 0   |
|           | 2005             | 26               | 13               | 0                | 4                | 5                | 1                | 0                | 2                | 2                 | 0                 | 13               | 2                | 2                | 1                 | 0                | 1                | 4                 | 0                 | 0                 | 3                 | 0    | 0                 | 0   |
|           | 2006             | 26               | 13               | 0                | 4                | 5                | 2                | 0                | 1                | 1                 | 0                 | 13               | 3                | 1                | 1                 | 0                | 2                | 2                 | 0                 | 0                 | 2                 | 0    | 0                 | 0   |
|           | 2007             | 26               | 14               | 0                | 5                | 4                | 1                | 0                | 2                | 2                 | 0                 | 12               | 2                | 1                | 0                 | 0                | 5                | 1                 | 0                 | 0                 | 2                 | 0    | 0                 | 0   |
|           | 2008             | 27               | 14               | 0                | 3                | 3                | 2                | 0                | 2                | 3                 | 0                 | 13               | 2                | 0                | 0                 | 0                | 7                | 3                 | 0                 | 0                 | 1                 | 0    | 0                 | 0   |
|           | 2009             | 28               | 14               | 0                | 3                | 3                | 2                | 0                | 3                | 3                 | 0                 | 14               | 0                | 0                | 0                 | 0                | 9                | 3                 | 0                 | 0                 | 1                 | 0    | 0                 | 0   |
|           | 2010             | 28               | 15               | 1                | 4                | 3                | 2                | 0                | 2                | 3                 | 0                 | 13               | 0                | 0                | 0                 | 0                | 6                | 5                 | 0                 | 0                 | 2                 | 0    | 0                 | 0   |
|           | 2011             | 28               | 14               | 1                | 4                | 4                | 1                | 0                | 2                | 2                 | 0                 | 14               | 0                | 0                | 0                 | 0                | 6                | 4                 | 1                 | 0                 | 2                 | 0    | 0                 | 0   |
|           | 2012             | 27               | 14               | 1                | 5                | 3                | 1                | 0                | 2                | 1                 | 0                 | 13               | 1                | 0                | 0                 | 0                | 5                | 4                 | 1                 | 0                 | 2                 | 0    | 0                 | 0   |
|           | 2013             | 26               | 13               | 1                | 5                | 3                | 1                | 0                | 2                | 1                 | 0                 | 13               | 1                | 0                | 0                 | 0                | 5                | 4                 | 1                 | 0                 | 2                 | 0    | 0                 | 0   |
|           | 2014             | 25               | 13               | 1                | 6                | 3                | 1                | 0                | 2                | 1                 | 0                 | 12               | 1                | 0                | 0                 | 0                | 5                | 4                 | 0                 | 0                 | 2                 | 0    | 0                 | 0   |
|           | 2015             | 24               | 12               | 1                | 5                | 3                | 1                | 0                | 2                | 1                 | 0                 | 12               | 1                | 0                | 0                 | 0                | 4                | 4                 | 1                 | 0                 | 2                 | 0    | 0                 | 0   |
| Guatemala | 2000             | 20153            | 8362             | 587              | 2258             | 2377             | 1377             | 82               | 627              | 1002              | 53                | 11791            | 3883             | 428              | 134               | 521              | 2311             | 529               | 2483              | 0                 | 1321              | 10   | 92                | 78  |
|           | 2001             | 19476            | 8124             | 564              | 2179             | 2293             | 1354             | 73               | 611              | 1001              | 49                | 11352            | 3745             | 415              | 132               | 503              | 2238             | 523               | 2305              | 0                 | 1291              | 7    | 113               | 81  |
|           | 2002             | 18813            | 7898             | 542              | 2115             | 2211             | 1323             | 65               | 594              | 1001              | 46                | 10915            | 3602             | 402              | 129               | 485              | 2168             | 516               | 2134              | 0                 | 1258              | 7    | 134               | 80  |
|           | 2003             | 18228            | 7755             | 527              | 2074             | 2155             | 1304             | 60               | 583              | 1009              | 43                | 10473            | 3453             | 387              | 126               | 465              | 2088             | 507               | 1970              | 0                 | 1220              | 6    | 168               | 82  |
|           | 2004             | 17646            | 7557             | 508              | 2022             | 2085             | 1271             | 54               | 568              | 1008              | 41                | 10089            | 3329             | 376              | 124               | 448              | 2026             | 502               | 1830              | 0                 | 1190              | 5    | 177               | 81  |
|           | 2005             | 17017            | 7337             | 490              | 1964             | 2015             | 1222             | 50               | 552              | 1007              | 39                | 9680             | 2713             | 402              | 135               | 291              | 2173             | 545               | 1876              | 0                 | 1281              | 7    | 173               | 84  |
|           | 2006             | 16401            | 7168             | 474              | 1924             | 1958             | 1182             | 46               | 539              | 1008              | 37                | 9233             | 2588             | 389              | 130               | 274              | 2097             | 535               | 1737              | 0                 | 1243              | 5    | 149               | 86  |
|           | 2007             | 15750            | 6943             | 456              | 1868             | 1887             | 1132             | 43               | 522              | 1001              | 35                | 8807             | 2495             | 373              | 126               | 267              | 2004             | 520               | 1594              | 0                 | 1196              | 2    | 142               | 88  |
|           | 2008             | 15099            | 6760             | 438              | 1812             | 1819             | 1116             | 39               | 509              | 994               | 33                | 8339             | 2310             | 359              | 121               | 237              | 1930             | 507               | 1471              | 0                 | 1157              | 1    | 161               | 85  |
|           | 2009             | 14615            | 6601             | 423              | 1749             | 1762             | 1111             | 34               | 503              | 988               | 31                | 8014             | 2239             | 347              | 117               | 233              | 1864             | 496               | 1364              | 0                 | 1121              | 1    | 148               | 85  |
|           | 2010             | 14197            | 6476             | 408              | 1683             | 1712             | 1127             | 29               | 504              | 986               | 28                | 7721             | 2169             | 340              | 116               | 223              | 1829             | 491               | 1194              | 0                 | 1104              | 1    | 167               | 86  |
|           | 2011             | 13849            | 6353             | 395              | 1629             | 1671             | 1114             | 25               | 505              | 987               | 26                | 7496             | 2167             | 331              | 113               | 231              | 1782             | 484               | 1048              | 0                 | 1081              | 1    | 169               | 89  |
|           | 2012             | 13558            | 6255             | 385              | 1598             | 1635             | 1093             | 23               | 503              | 992               | 25                | 7303             | 2063             | 329              | 113               | 209              | 1774             | 486               | 979               | 0                 | 1078              | 1    | 184               | 87  |
|           | 2013             | 13370            | 6162             | 377              | 1584             | 1605             | 1057             | 22               | 497              | 996               | 24                | 7208             | 1971             | 333              | 114               | 197              | 1796             | 496               | 951               | 0                 | 1092              | 1    | 172               | 86  |
|           | 2014             | 13147            | 6049             | 368              | 1567             | 1565             | 1025             | 21               | 487              | 994               | 23                | 7098             | 1847             | 333              | 114               | 180              | 1799             | 501               | 965               | 0                 | 1094              | 1    | 178               | 85  |
|           | 2015             | 12858            | 5946             | 359              | 1551             | 1528             | 996              | 20               | 477              | 992               | 22                | 6912             | 1798             | 326              | 112               | 175              | 1764             | 496               | 909               | 0                 | 1074              | 1    | 174               | 83  |
| Guyana    | 2000             | 882              | 483              | 12               | 227              | 99               | 71               | 0                | 27               | 46                | 0                 | 399              | 62               | 2                | 3                 | 6                | 88               | 39                | 108               | 0                 | 41                | 28   | 21                | 0   |
|           | 2001             | 845              | 464              | 18               | 193              | 114              | 57               | 0                | 32               | 50                | 0                 | 381              | 45               | 2                | 6                 | 11               | 84               | 33                | 116               | 0                 | 23                | 30   | 32                | 0   |
|           | 2002             | 806              | 443              | 13               | 212              | 74               | 79               | 0                | 23               | 42                | 0                 | 363              | 60               | 4                | 9                 | 7                | 69               | 40                | 82                | 0                 | 28                | 23   | 41                | 0   |
|           | 2003             | 761              | 419              | 2                | 215              | 85               | 61               | 0                | 20               | 37                | 0                 | 342              | 43               | 0                | 0                 | 8                | 64               | 53                | 71                | 0                 | 38                | 30   | 35                | 0   |
|           | 2004             | 716              | 394              | 5                | 170              | 78               | 74               | 0                | 34               | 33                | 0                 | 322              | 49               | 4                | 7                 | 9                | 59               | 50                | 34                | 0                 | 48                | 33   | 31                | 0   |
|           | 2005             | 668              | 368              | 12               | 165              | 73               | 69               | 0                | 14               | 35                | 0                 | 300              | 40               | 0                | 2                 | 9                | 59               | 25                | 60                | 0                 | 23                | 55   | 27                | 0   |
|           | 2006             | 616              | 337              | 10               | 154              | 64               | 39               | 0                | 27               | 43                | 0                 | 279              | 39               | 0                | 0                 | 5                | 43               | 34                | 68                | 0                 | 50                | 25   | 15                | 0   |
|           | 2007             | 563              | 306              | 6                | 132              | 69               | 36               | 2                | 36               | 25                | 0                 | 257              | 34               | 7                | 2                 | 7                | 59               | 43                | 34                | 0                 | 42                | 9    | 21                | 0   |
|           | 2008             | 517              | 280              | 8                | 99               | 62               | 34               | 0                | 50               | 28                | 0                 | 237              | 28               | 0                | 0                 | 7                | 93               | 24                | 35                | 0                 | 30                | 11   | 9                 | 0   |
|           | 2009             | 486              | 263              | 8                | 94               | 43               | 31               | 0                | 43               | 43                | 0                 | 223              | 30               | 0                | 0                 | 13               | 60               | 21                | 39                | 0                 | 40                | 16   | 4                 | 0   |
|           | 2010             | 478              | 261              | 4                | 83               | 67               | 38               | 0                | 31               | 38                | 0                 | 217              | 27               | 0                | 3                 | 3                | 55               | 23                | 33                | 0                 | 34                | 37   | 2                 | 0   |
|           | 2011             | 492              | 278              | 11               | 83               | 62               | 51               | 0                | 47               | 25                | 0                 | 214              | 28               | 0                | 0                 | 8                | 58               | 20                | 18                | 0                 | 32                | 45   | 5                 | 0   |
|           | 2012             | 532              | 310              | 9                | 100              | 66               | 47               | 0                | 47               | 41                | 0                 | 222              | 27               | 0                | 1                 | 8                | 55               | 20                | 28                | 0                 | 33                | 46   | 3                 | 0   |
|           | 2013             | 582              | 346              | 11               | 112              | 73               | 53               | 0                | 52               | 46                | 0                 | 236              | 30               | 0                | 1                 | 8                | 62               | 23                | 32                | 0                 | 37                | 39   | 4                 | 0   |
|           | 2014             | 623              | 376              | 11               | 121              | 80               | 57               | 0                | 57               | 50                | 0                 | 247              | 31               | 0                | 1                 | 9                | 64               | 24                | 33                | 0                 | 39                | 42   | 4                 | 0   |
|           | 2015             | 642              | 391              | 12               | 126              | 83               | 59               | 0                | 59               | 52                | 0                 | 251              | 32               | 0                | 1                 | 9                | 66               | 24                | 34                | 0                 | 40                | 40   | 4                 | 0   |
| Haiti     | 2000             | 27905            | 8146             | 605              | 2735             | 2274             | 1131             | 156              | 640              | 479               | 126               | 19759            | 5934             | 466              | 392               | 1134             | 2983             | 806               | 4682              | 0                 | 1525              | 143  | 1338              | 356 |
|           | 2001             | 26914            | 8028             | 592              | 2710             | 2229             | 1114             | 149              | 629              | 484               | 121               | 18886            | 5693             | 450              | 381               | 1092             | 2864             | 793               | 4326              | 0                 | 1486              | 146  | 1304              | 352 |
|           | 2002             | 25938            | 7951             | 581              | 2706             | 2184             | 1110             | 144              | 620              | 489               | 118               | 17987            | 5445             | 433              | 368               | 1050             | 2745             | 775               | 3989              | 0                 | 1442              | 149  | 1248              | 344 |
|           | 2003             | 25004            | 7902             | 572              | 2721             | 2138             | 1114             | 139              | 611              | 493               | 115               | 17102            | 5200             |                  |                   |                  |                  |                   |                   |                   |                   |      |                   |     |

Webappendix 6. Estimated numbers of deaths by cause in neonates, children aged 1-59 months at the global, regional and country levels in 2000-2015

| Year      | USD <sup>1</sup> | 0-28 days        |                  |                  |                  |                  |                  |                  |                  |                   |                   | 1-59 months      |                  |                  |                   |                  |                  |                   |                   |                   |                   |      |                   |     |
|-----------|------------------|------------------|------------------|------------------|------------------|------------------|------------------|------------------|------------------|-------------------|-------------------|------------------|------------------|------------------|-------------------|------------------|------------------|-------------------|-------------------|-------------------|-------------------|------|-------------------|-----|
|           |                  | NEO <sup>2</sup> | PNE <sup>3</sup> | PRE <sup>4</sup> | INT <sup>5</sup> | SEP <sup>6</sup> | TET <sup>7</sup> | OTH <sup>8</sup> | CON <sup>9</sup> | DIA <sup>10</sup> | POS <sup>11</sup> | PNE <sup>3</sup> | PRE <sup>4</sup> | INT <sup>5</sup> | MEN <sup>12</sup> | OTH <sup>8</sup> | CON <sup>9</sup> | DIA <sup>10</sup> | MEA <sup>13</sup> | INJ <sup>14</sup> | MAL <sup>15</sup> | AIDS | PER <sup>16</sup> |     |
| Mexico    | 2014             | 652              | 480              | 18               | 182              | 60               | 48               | 2                | 58               | 112               | 0                 | 172              | 25               | 4                | 4                 | 4                | 34               | 35                | 11                | 0                 | 27                | 0    | 19                | 8   |
| Mexico    | 2015             | 631              | 464              | 17               | 175              | 58               | 46               | 2                | 57               | 109               | 0                 | 167              | 24               | 4                | 4                 | 4                | 33               | 35                | 11                | 0                 | 26                | 0    | 18                | 8   |
| Mexico    | 2000             | 64086            | 25193            | 1475             | 9540             | 3971             | 3183             | 0                | 2081             | 4942              | 0                 | 38893            | 8983             | 646              | 349               | 1004             | 9608             | 7456              | 4975              | 0                 | 5760              | 1    | 103               | 8   |
| Mexico    | 2001             | 59954            | 23032            | 1297             | 8694             | 3551             | 3051             | 0                | 1839             | 4600              | 0                 | 36922            | 8019             | 683              | 430               | 780              | 9102             | 7210              | 4586              | 0                 | 5989              | 0    | 98                | 24  |
| Mexico    | 2002             | 55646            | 21060            | 1144             | 8065             | 3090             | 2883             | 2                | 1669             | 4206              | 0                 | 34586            | 8155             | 717              | 335               | 692              | 8437             | 6426              | 4084              | 0                 | 5619              | 0    | 112               | 10  |
| Mexico    | 2003             | 52056            | 19578            | 1032             | 7590             | 2894             | 2536             | 0                | 1489             | 4037              | 0                 | 32478            | 6862             | 805              | 368               | 700              | 8193             | 6407              | 3852              | 0                 | 5130              | 0    | 143               | 18  |
| Mexico    | 2004             | 49081            | 18875            | 1066             | 7326             | 2804             | 2386             | 0                | 1321             | 3973              | 0                 | 30206            | 6907             | 720              | 380               | 647              | 7314             | 6195              | 3166              | 0                 | 4728              | 0    | 133               | 15  |
| Mexico    | 2005             | 46553            | 18490            | 1008             | 7083             | 2751             | 2440             | 0                | 1128             | 4080              | 0                 | 28063            | 5887             | 733              | 398               | 529              | 7024             | 5891              | 3123              | 0                 | 4344              | 0    | 87                | 48  |
| Mexico    | 2006             | 44763            | 17648            | 974              | 6505             | 2567             | 2331             | 0                | 1080             | 4192              | 0                 | 27115            | 5591             | 729              | 389               | 570              | 6715             | 5904              | 2572              | 0                 | 4515              | 0    | 104               | 25  |
| Mexico    | 2007             | 43385            | 16171            | 773              | 6152             | 2285             | 2089             | 0                | 1068             | 3804              | 0                 | 27214            | 5104             | 830              | 332               | 547              | 7878             | 5863              | 2618              | 0                 | 3931              | 0    | 104               | 8   |
| Mexico    | 2008             | 42138            | 15453            | 726              | 5671             | 2136             | 2196             | 0                | 1015             | 3708              | 0                 | 26685            | 4843             | 833              | 290               | 515              | 8053             | 6016              | 2201              | 0                 | 3806              | 0    | 106               | 22  |
| Mexico    | 2009             | 40965            | 16173            | 749              | 5926             | 2179             | 2330             | 0                | 1097             | 3893              | 0                 | 24792            | 4643             | 777              | 246               | 376              | 7497             | 5720              | 1674              | 0                 | 3699              | 0    | 103               | 57  |
| Mexico    | 2010             | 39580            | 18086            | 898              | 6694             | 2365             | 2575             | 0                | 1167             | 4387              | 0                 | 21494            | 3979             | 699              | 219               | 399              | 6520             | 5318              | 1307              | 0                 | 2961              | 0    | 65                | 28  |
| Mexico    | 2011             | 37776            | 19329            | 1044             | 6656             | 2642             | 2920             | 0                | 1298             | 4769              | 0                 | 18447            | 3557             | 665              | 186               | 341              | 5003             | 4606              | 1151              | 0                 | 2814              | 0    | 66                | 57  |
| Mexico    | 2012             | 36230            | 19170            | 963              | 6616             | 2447             | 3013             | 0                | 1297             | 4834              | 0                 | 17060            | 2962             | 627              | 210               | 267              | 4690             | 4446              | 1049              | 0                 | 2684              | 0    | 48                | 78  |
| Mexico    | 2013             | 34428            | 18284            | 817              | 6430             | 2320             | 2698             | 0                | 1196             | 4823              | 0                 | 16144            | 2779             | 589              | 160               | 249              | 4749             | 4025              | 1035              | 0                 | 2449              | 0    | 48                | 61  |
| Mexico    | 2014             | 32785            | 17590            | 874              | 6105             | 2294             | 2672             | 0                | 1174             | 4472              | 0                 | 15195            | 2727             | 554              | 164               | 251              | 4256             | 3847              | 953               | 0                 | 2338              | 0    | 47                | 58  |
| Mexico    | 2015             | 31278            | 16596            | 824              | 5760             | 2164             | 2521             | 0                | 1108             | 4219              | 0                 | 14682            | 2635             | 535              | 158               | 242              | 4112             | 3718              | 920               | 0                 | 2259              | 0    | 46                | 56  |
| Nicaragua | 2000             | 5511             | 2333             | 168              | 978              | 443              | 207              | 29               | 184              | 323               | 0                 | 3178             | 825              | 23               | 16                | 91               | 788              | 336               | 853               | 0                 | 161               | 6    | 52                | 25  |
| Nicaragua | 2001             | 5175             | 2238             | 160              | 930              | 419              | 200              | 27               | 178              | 324               | 0                 | 2937             | 773              | 25               | 17                | 86               | 721              | 337               | 738               | 0                 | 161               | 3    | 50                | 25  |
| Nicaragua | 2002             | 4853             | 2143             | 152              | 882              | 395              | 193              | 25               | 172              | 325               | 0                 | 2710             | 705              | 24               | 17                | 79               | 663              | 327               | 665               | 0                 | 155               | 2    | 48                | 25  |
| Nicaragua | 2003             | 4567             | 2050             | 144              | 838              | 372              | 185              | 23               | 165              | 323               | 0                 | 2517             | 642              | 24               | 17                | 72               | 615              | 317               | 607               | 0                 | 150               | 2    | 45                | 25  |
| Nicaragua | 2004             | 4326             | 1939             | 134              | 786              | 347              | 175              | 20               | 158              | 318               | 0                 | 2387             | 599              | 24               | 16                | 67               | 580              | 311               | 569               | 0                 | 149               | 2    | 43                | 27  |
| Nicaragua | 2005             | 4106             | 1852             | 126              | 745              | 327              | 164              | 23               | 153              | 315               | 0                 | 2254             | 567              | 26               | 17                | 64               | 545              | 314               | 504               | 0                 | 149               | 2    | 40                | 26  |
| Nicaragua | 2006             | 3932             | 1776             | 117              | 708              | 309              | 157              | 24               | 150              | 311               | 0                 | 2156             | 550              | 28               | 18                | 62               | 518              | 320               | 445               | 0                 | 153               | 1    | 36                | 26  |
| Nicaragua | 2007             | 3790             | 1721             | 110              | 679              | 294              | 152              | 28               | 149              | 308               | 0                 | 2069             | 536              | 31               | 20                | 61               | 492              | 329               | 387               | 0                 | 157               | 0    | 32                | 25  |
| Nicaragua | 2008             | 3666             | 1654             | 102              | 645              | 278              | 150              | 28               | 148              | 303               | 0                 | 2012             | 525              | 33               | 22                | 60               | 475              | 337               | 347               | 0                 | 160               | 0    | 28                | 24  |
| Nicaragua | 2009             | 3545             | 1608             | 97               | 621              | 266              | 149              | 28               | 147              | 300               | 0                 | 1937             | 506              | 35               | 23                | 57               | 455              | 338               | 317               | 0                 | 161               | 0    | 20                | 25  |
| Nicaragua | 2010             | 3405             | 1539             | 91               | 590              | 251              | 144              | 27               | 143              | 293               | 0                 | 1866             | 483              | 36               | 24                | 54               | 436              | 336               | 296               | 0                 | 159               | 0    | 17                | 26  |
| Nicaragua | 2011             | 3255             | 1469             | 86               | 560              | 237              | 136              | 26               | 138              | 286               | 0                 | 1786             | 457              | 37               | 24                | 51               | 419              | 330               | 277               | 0                 | 155               | 0    | 12                | 25  |
| Nicaragua | 2012             | 3102             | 1392             | 81               | 528              | 222              | 127              | 25               | 132              | 277               | 0                 | 1710             | 432              | 37               | 24                | 48               | 402              | 323               | 260               | 0                 | 151               | 0    | 9                 | 24  |
| Nicaragua | 2013             | 2928             | 1313             | 76               | 496              | 207              | 119              | 23               | 126              | 266               | 0                 | 1615             | 402              | 38               | 24                | 44               | 380              | 313               | 240               | 0                 | 144               | 0    | 7                 | 23  |
| Nicaragua | 2014             | 2787             | 1249             | 72               | 469              | 195              | 112              | 22               | 122              | 257               | 0                 | 1538             | 379              | 37               | 24                | 41               | 362              | 303               | 225               | 0                 | 138               | 0    | 7                 | 22  |
| Nicaragua | 2015             | 2662             | 1170             | 67               | 437              | 181              | 104              | 21               | 116              | 244               | 0                 | 1492             | 364              | 36               | 23                | 39               | 351              | 300               | 216               | 0                 | 135               | 1    | 7                 | 21  |
| Panama    | 2000             | 1883             | 1071             | 74               | 377              | 154              | 118              | 0                | 41               | 307               | 0                 | 812              | 111              | 7                | 1                 | 28               | 300              | 208               | 88                | 0                 | 56                | 0    | 13                | 0   |
| Panama    | 2001             | 1834             | 1043             | 54               | 471              | 109              | 82               | 0                | 70               | 257               | 0                 | 791              | 103              | 4                | 0                 | 26               | 272              | 215               | 96                | 0                 | 62                | 0    | 8                 | 4   |
| Panama    | 2002             | 1766             | 996              | 26               | 406              | 128              | 126              | 0                | 49               | 261               | 0                 | 770              | 93               | 1                | 0                 | 23               | 221              | 254               | 79                | 0                 | 80                | 0    | 9                 | 8   |
| Panama    | 2003             | 1683             | 953              | 20               | 296              | 144              | 102              | 0                | 116              | 274               | 0                 | 730              | 102              | 6                | 1                 | 11               | 206              | 216               | 90                | 0                 | 88                | 0    | 7                 | 1   |
| Panama    | 2004             | 1616             | 909              | 31               | 315              | 109              | 110              | 0                | 68               | 276               | 0                 | 707              | 104              | 7                | 1                 | 22               | 209              | 187               | 91                | 0                 | 68                | 0    | 14                | 3   |
| Panama    | 2005             | 1567             | 883              | 64               | 272              | 112              | 104              | 0                | 64               | 267               | 0                 | 684              | 130              | 3                | 3                 | 15               | 224              | 118               | 112               | 0                 | 71                | 0    | 7                 | 1   |
| Panama    | 2006             | 1539             | 866              | 34               | 291              | 114              | 137              | 0                | 76               | 215               | 0                 | 673              | 122              | 8                | 2                 | 17               | 177              | 196               | 63                | 0                 | 68                | 0    | 6                 | 13  |
| Panama    | 2007             | 1528             | 865              | 36               | 270              | 127              | 142              | 0                | 49               | 241               | 0                 | 663              | 146              | 3                | 2                 | 16               | 175              | 126               | 106               | 0                 | 74                | 0    | 10                | 6   |
| Panama    | 2008             | 1517             | 869              | 43               | 217              | 165              | 132              | 0                | 45               | 268               | 0                 | 648              | 157              | 1                | 1                 | 10               | 177              | 162               | 65                | 0                 | 66                | 0    | 4                 | 5   |
| Panama    | 2009             | 1516             | 862              | 33               | 290              | 95               | 136              | 0                | 72               | 235               | 0                 | 654              | 101              | 4                | 2                 | 22               | 171              | 139               | 137               | 0                 | 65                | 0    | 3                 | 9   |
| Panama    | 2010             | 1489             | 854              | 48               | 215              | 109              | 157              | 0                | 61               | 263               | 0                 | 635              | 180              | 4                | 3                 | 20               | 153              | 113               | 87                | 0                 | 68                | 0    | 4                 | 2   |
| Panama    | 2011             | 1456             | 830              | 48               | 225              | 107              | 156              | 0                | 59               | 235               | 0                 | 626              | 160              | 1                | 2                 | 21               | 159              | 151               | 74                | 0                 | 53                | 0    | 1                 | 2   |
| Panama    | 2012             | 1421             | 808              | 31               | 286              | 116              | 97               | 0                | 55               | 222               | 0                 | 613              | 137              | 1                | 3                 | 14               | 175              | 163               | 71                | 0                 | 46                | 0    | 2                 | 0   |
| Panama    | 2013             | 1371             | 774              | 43               | 275              | 117              | 91               | 0                | 67               | 180               | 0                 | 597              | 145              | 1                | 3                 | 16               | 178              | 147               | 74                | 0                 | 28                | 0    | 5                 | 1   |
| Panama    | 2014             | 1327             | 747              | 38               | 244              | 105              | 106              | 0                | 57               | 197               | 0                 | 580              | 139              | 1                | 3                 | 16               | 162              | 146               | 69                | 0                 | 40                | 0    | 3                 | 1   |
| Panama    | 2015             | 1277             | 721              | 36               | 236              | 102              | 103              | 0                | 55               | 190               | 0                 | 556              | 134              | 1                | 3                 | 15               | 155              | 140               | 67                | 0                 | 39                | 0    | 2                 | 1   |
| Paraguay  | 2000             | 4912             | 2595             | 110              | 1095             | 377              | 347              | 63               | 208              | 395               | 0                 | 2317             | 595              | 11               | 6                 | 65               | 454              | 328               | 458               | 0                 | 232               | 0    | 15                | 153 |
| Paraguay  | 2001             | 4692             | 2473             | 105              | 1034             | 353              | 311              | 82               | 205              | 384               | 0                 | 2219             | 567              | 12               | 6                 | 62               | 424              | 323               | 424               | 0                 | 232               | 0    | 16                | 152 |
| Paraguay  | 2002             | 4433             | 2331             | 98               | 966              | 327              | 333              | 37               | 198              | 371               | 0                 | 2102             | 532              | 13               | 7                 | 58               | 386              | 313               | 393               | 0                 | 228               | 0    | 18                | 154 |
| Paraguay  | 2003             | 4152             | 2201             | 92               | 908              | 305              | 309              | 36               | 190              | 361               | 0                 | 1951             | 452              | 19               | 10                | 67               | 398              | 305               | 323               | 0                 | 203               | 0    | 20                | 154 |
| Paraguay  | 2004             | 3916             | 2077             | 89               | 856              | 285              | 291              | 28               | 178              | 350               | 0                 | 1839             | 426              | 22               | 12                | 64               | 358              | 300               | 282               | 0                 | 201               | 0    | 22                | 153 |
| Paraguay  | 2005             | 3735             | 1998             | 86               | 823              | 272              | 279              | 20               | 171              | 349               | 0                 | 1737             | 403              | 24               | 13                | 60               | 326              | 295               | 244               | 0                 | 198               | 0    | 25                | 149 |
| Paraguay  | 2006             | 3634             | 1954             | 84               | 805              | 265              | 265              | 17               | 166              | 352               | 0                 | 1680             | 386              | 26               | 14                | 57               | 313              | 295               | 225               | 0                 | 197               | 0    | 20                | 147 |
| Paraguay  | 2007             | 3583             | 1935             | 83               | 798              | 261              | 247              | 21               | 163              | 361               | 0                 | 1648             | 370              | 28               | 15                | 55               | 310              | 293               | 223               | 0                 | 195               | 0    | 13                | 146 |
| Paraguay  | 2008             | 3553             | 1925             | 82               | 793              | 260              | 237              | 21               | 163              | 370               | 0                 | 1628             | 353              | 30               | 17                | 52               | 309              | 290               | 226               | 0                 | 192               | 0    | 14                | 147 |
| Paraguay  | 2009             | 3519             | 1917             | 80               | 788              | 257              | 229              | 21               | 163              | 378               | 0                 | 1602             | 337              | 32               | 18                | 49               | 299              | 286               | 226               | 0                 | 189               | 0    | 16                | 151 |
| Paraguay  | 2010             | 3446             | 1871             | 77               | 767              | 250              | 226              | 14               | 160              | 378               | 0                 | 1575             |                  |                  |                   |                  |                  |                   |                   |                   |                   |      |                   |     |



Webappendix 6. Estimated numbers of deaths by cause in neonates, children aged 1-59 months at the global, regional and country levels in 2000-2015

| Year | 0-28 days        |                  |                  |                  |                  |                  |                  |                  |                  |                   |                   | 1-59 months      |                  |                  |                   |                  |                  |                   |                   |                   |                   |      |                   |   |
|------|------------------|------------------|------------------|------------------|------------------|------------------|------------------|------------------|------------------|-------------------|-------------------|------------------|------------------|------------------|-------------------|------------------|------------------|-------------------|-------------------|-------------------|-------------------|------|-------------------|---|
|      | USD <sup>1</sup> | NEO <sup>2</sup> | PNE <sup>3</sup> | PRE <sup>4</sup> | INT <sup>5</sup> | SEP <sup>6</sup> | TET <sup>7</sup> | OTH <sup>8</sup> | CON <sup>9</sup> | DIA <sup>10</sup> | POS <sup>11</sup> | PNE <sup>3</sup> | PRE <sup>4</sup> | INT <sup>5</sup> | MEN <sup>12</sup> | OTH <sup>8</sup> | CON <sup>9</sup> | DIA <sup>10</sup> | MEA <sup>13</sup> | INJ <sup>14</sup> | MAL <sup>15</sup> | AIDS | PER <sup>16</sup> |   |
| 2009 | 47               | 30               | 2                | 9                | 5                | 2                | 0                | 5                | 8                | 0                 | 17                | 3                | 0                | 0                | 1                 | 9                | 5                | 0                 | 0                 | 0                 | 0                 | 0    | 0                 |   |
| 2010 | 46               | 30               | 1                | 12               | 7                | 4                | 0                | 3                | 3                | 0                 | 16                | 2                | 1                | 0                | 1                 | 7                | 5                | 0                 | 0                 | 0                 | 0                 | 0    | 0                 |   |
| 2011 | 45               | 29               | 1                | 13               | 5                | 5                | 0                | 2                | 3                | 0                 | 16                | 2                | 1                | 0                | 1                 | 6                | 4                | 0                 | 0                 | 0                 | 2                 | 0    | 0                 |   |
| 2012 | 44               | 29               | 1                | 13               | 5                | 5                | 0                | 3                | 3                | 0                 | 15                | 1                | 2                | 0                | 0                 | 7                | 3                | 0                 | 0                 | 2                 | 0                 | 0    | 0                 |   |
| 2013 | 43               | 28               | 1                | 14               | 5                | 3                | 0                | 2                | 3                | 0                 | 15                | 1                | 1                | 0                | 0                 | 6                | 4                | 0                 | 0                 | 3                 | 0                 | 0    | 0                 |   |
| 2014 | 42               | 27               | 1                | 12               | 5                | 4                | 0                | 2                | 3                | 0                 | 15                | 2                | 1                | 0                | 0                 | 6                | 4                | 0                 | 0                 | 2                 | 0                 | 0    | 0                 |   |
| 2015 | 40               | 26               | 1                | 12               | 5                | 4                | 0                | 2                | 3                | 0                 | 14                | 1                | 1                | 0                | 0                 | 6                | 4                | 0                 | 0                 | 2                 | 0                 | 0    | 0                 |   |
| 2000 | 48               | 29               | 0                | 16               | 5                | 2                | 0                | 1                | 6                | 0                 | 19                | 2                | 2                | 1                | 1                 | 6                | 2                | 2                 | 0                 | 3                 | 0                 | 2    | 0                 |   |
| 2001 | 46               | 28               | 0                | 14               | 4                | 3                | 0                | 2                | 4                | 0                 | 18                | 2                | 2                | 1                | 0                 | 6                | 2                | 1                 | 0                 | 3                 | 0                 | 2    | 0                 |   |
| 2002 | 44               | 27               | 0                | 13               | 5                | 4                | 0                | 4                | 2                | 0                 | 17                | 1                | 1                | 2                | 0                 | 6                | 1                | 2                 | 0                 | 4                 | 0                 | 1    | 0                 |   |
| 2003 | 43               | 27               | 0                | 13               | 3                | 4                | 0                | 5                | 2                | 0                 | 16                | 1                | 2                | 2                | 0                 | 4                | 2                | 1                 | 0                 | 4                 | 0                 | 1    | 0                 |   |
| 2004 | 42               | 26               | 0                | 13               | 2                | 3                | 0                | 4                | 4                | 0                 | 16                | 1                | 1                | 2                | 0                 | 4                | 2                | 2                 | 0                 | 3                 | 0                 | 1    | 0                 |   |
| 2005 | 41               | 26               | 0                | 12               | 2                | 5                | 0                | 3                | 4                | 0                 | 15                | 1                | 2                | 1                | 0                 | 5                | 3                | 1                 | 0                 | 2                 | 0                 | 0    | 0                 |   |
| 2006 | 41               | 26               | 0                | 12               | 4                | 6                | 0                | 1                | 3                | 0                 | 15                | 1                | 1                | 0                | 0                 | 8                | 3                | 1                 | 0                 | 1                 | 0                 | 1    | 0                 |   |
| 2007 | 41               | 26               | 0                | 11               | 4                | 8                | 0                | 1                | 3                | 0                 | 15                | 0                | 1                | 0                | 0                 | 10               | 2                | 0                 | 0                 | 1                 | 0                 | 1    | 0                 |   |
| 2008 | 42               | 26               | 1                | 12               | 3                | 6                | 0                | 2                | 2                | 0                 | 16                | 0                | 0                | 0                | 0                 | 11               | 1                | 0                 | 0                 | 3                 | 0                 | 1    | 0                 |   |
| 2009 | 42               | 26               | 0                | 13               | 3                | 5                | 0                | 2                | 2                | 0                 | 16                | 1                | 0                | 0                | 0                 | 10               | 1                | 0                 | 0                 | 3                 | 0                 | 0    | 0                 |   |
| 2010 | 41               | 26               | 1                | 15               | 3                | 3                | 0                | 1                | 3                | 0                 | 15                | 1                | 0                | 0                | 0                 | 7                | 4                | 0                 | 0                 | 3                 | 0                 | 0    | 0                 |   |
| 2011 | 39               | 25               | 0                | 16               | 4                | 2                | 0                | 0                | 2                | 0                 | 14                | 2                | 0                | 0                | 0                 | 6                | 5                | 0                 | 0                 | 1                 | 0                 | 0    | 0                 |   |
| 2012 | 37               | 23               | 0                | 13               | 4                | 3                | 0                | 1                | 2                | 0                 | 14                | 2                | 1                | 0                | 0                 | 5                | 5                | 0                 | 0                 | 2                 | 0                 | 0    | 0                 |   |
| 2013 | 34               | 22               | 0                | 11               | 4                | 4                | 0                | 1                | 2                | 0                 | 12                | 2                | 1                | 0                | 0                 | 4                | 3                | 0                 | 0                 | 2                 | 0                 | 0    | 0                 |   |
| 2014 | 32               | 20               | 0                | 9                | 4                | 3                | 0                | 1                | 2                | 0                 | 12                | 2                | 2                | 0                | 0                 | 4                | 3                | 0                 | 0                 | 1                 | 0                 | 0    | 0                 |   |
| 2015 | 30               | 19               | 0                | 10               | 3                | 3                | 0                | 1                | 2                | 0                 | 11                | 1                | 1                | 0                | 0                 | 4                | 3                | 0                 | 0                 | 1                 | 0                 | 0    | 0                 |   |
| 2000 | 373              | 200              | 11               | 75               | 26               | 55               | 0                | 2                | 30               | 0                 | 173               | 19               | 3                | 3                | 8                 | 54               | 15               | 25                | 0                 | 31                | 11                | 5    | 0                 |   |
| 2001 | 355              | 191              | 4                | 73               | 43               | 18               | 0                | 27               | 26               | 0                 | 164               | 20               | 9                | 0                | 6                 | 51               | 19               | 10                | 0                 | 21                | 10                | 17   | 0                 |   |
| 2002 | 335              | 179              | 0                | 66               | 55               | 22               | 0                | 6                | 30               | 0                 | 156               | 10               | 5                | 2                | 14                | 63               | 16               | 5                 | 0                 | 18                | 6                 | 17   | 0                 |   |
| 2003 | 317              | 170              | 0                | 90               | 39               | 14               | 0                | 5                | 22               | 0                 | 147               | 30               | 2                | 0                | 3                 | 49               | 20               | 8                 | 0                 | 18                | 7                 | 10   | 0                 |   |
| 2004 | 301              | 161              | 0                | 71               | 38               | 18               | 0                | 10               | 25               | 0                 | 140               | 12               | 4                | 0                | 6                 | 52               | 20               | 11                | 0                 | 26                | 2                 | 8    | 0                 |   |
| 2005 | 289              | 156              | 0                | 77               | 35               | 12               | 0                | 11               | 22               | 0                 | 133               | 24               | 4                | 0                | 2                 | 61               | 13               | 4                 | 0                 | 21                | 0                 | 6    | 0                 |   |
| 2006 | 278              | 150              | 0                | 63               | 35               | 27               | 0                | 6                | 19               | 0                 | 128               | 16               | 4                | 3                | 7                 | 38               | 22               | 6                 | 0                 | 26                | 0                 | 6    | 0                 |   |
| 2007 | 270              | 146              | 1                | 62               | 21               | 28               | 0                | 11               | 23               | 0                 | 124               | 22               | 9                | 0                | 2                 | 30               | 23               | 5                 | 0                 | 23                | 0                 | 8    | 0                 |   |
| 2008 | 262              | 142              | 1                | 59               | 25               | 22               | 0                | 4                | 31               | 0                 | 120               | 14               | 5                | 3                | 5                 | 45               | 16               | 3                 | 0                 | 16                | 0                 | 12   | 0                 |   |
| 2009 | 256              | 139              | 0                | 59               | 23               | 22               | 0                | 11               | 23               | 0                 | 117               | 20               | 2                | 4                | 6                 | 41               | 16               | 6                 | 0                 | 17                | 0                 | 6    | 0                 |   |
| 2010 | 251              | 136              | 2                | 57               | 22               | 22               | 0                | 10               | 22               | 0                 | 115               | 20               | 3                | 3                | 10                | 28               | 21               | 0                 | 0                 | 26                | 0                 | 5    | 0                 |   |
| 2011 | 243              | 131              | 2                | 46               | 24               | 28               | 0                | 8                | 23               | 0                 | 112               | 13               | 6                | 7                | 5                 | 29               | 34               | 3                 | 0                 | 14                | 0                 | 0    | 0                 |   |
| 2012 | 235              | 126              | 0                | 62               | 21               | 17               | 0                | 5                | 21               | 0                 | 109               | 18               | 3                | 3                | 0                 | 33               | 12               | 6                 | 0                 | 25                | 0                 | 9    | 0                 |   |
| 2013 | 225              | 121              | 1                | 51               | 21               | 20               | 0                | 7                | 21               | 0                 | 104               | 16               | 4                | 4                | 4                 | 28               | 20               | 3                 | 0                 | 20                | 0                 | 4    | 0                 |   |
| 2014 | 216              | 116              | 1                | 49               | 20               | 20               | 0                | 7                | 20               | 0                 | 100               | 15               | 3                | 4                | 4                 | 27               | 20               | 3                 | 0                 | 19                | 0                 | 4    | 0                 |   |
| 2015 | 209              | 112              | 1                | 47               | 19               | 19               | 0                | 6                | 19               | 0                 | 97                | 15               | 3                | 4                | 4                 | 26               | 19               | 3                 | 0                 | 19                | 0                 | 4    | 0                 |   |
| 2000 | 529              | 344              | 8                | 152              | 128              | 15               | 0                | 7                | 34               | 0                 | 185               | 128              | 9                | 46               | 13                | 6                | 46               | 32                | 5                 | 0                 | 11                | 0    | 16                | 0 |
| 2001 | 529              | 345              | 15               | 155              | 49               | 28               | 0                | 26               | 72               | 0                 | 184               | 12               | 0                | 0                | 3                 | 53               | 39               | 7                 | 0                 | 49                | 0                 | 22   | 0                 |   |
| 2002 | 533              | 349              | 16               | 119              | 32               | 42               | 0                | 42               | 97               | 0                 | 184               | 16               | 0                | 0                | 4                 | 62               | 19               | 0                 | 0                 | 49                | 0                 | 35   | 0                 |   |
| 2003 | 539              | 352              | 9                | 151              | 34               | 50               | 0                | 33               | 74               | 0                 | 187               | 31               | 0                | 2                | 9                 | 63               | 31               | 17                | 0                 | 25                | 0                 | 8    | 0                 |   |
| 2004 | 541              | 353              | 12               | 130              | 56               | 37               | 0                | 47               | 71               | 0                 | 188               | 25               | 5                | 5                | 2                 | 62               | 42               | 0                 | 0                 | 26                | 0                 | 20   | 0                 |   |
| 2005 | 538              | 351              | 20               | 124              | 50               | 41               | 0                | 37               | 78               | 0                 | 187               | 22               | 2                | 2                | 4                 | 55               | 55               | 8                 | 0                 | 28                | 0                 | 10   | 0                 |   |
| 2006 | 532              | 348              | 14               | 93               | 72               | 30               | 0                | 37               | 102              | 0                 | 184               | 15               | 10               | 2                | 5                 | 56               | 44               | 6                 | 0                 | 34                | 0                 | 12   | 0                 |   |
| 2007 | 520              | 339              | 16               | 105              | 60               | 16               | 0                | 67               | 76               | 0                 | 181               | 23               | 0                | 0                | 3                 | 64               | 50               | 0                 | 0                 | 26                | 0                 | 15   | 0                 |   |
| 2008 | 505              | 330              | 23               | 127              | 42               | 19               | 0                | 40               | 79               | 0                 | 175               | 14               | 0                | 0                | 4                 | 55               | 48               | 4                 | 0                 | 44                | 0                 | 6    | 0                 |   |
| 2009 | 491              | 320              | 25               | 138              | 38               | 20               | 0                | 55               | 45               | 0                 | 171               | 15               | 0                | 0                | 3                 | 76               | 48               | 2                 | 0                 | 26                | 0                 | 2    | 0                 |   |
| 2010 | 474              | 308              | 20               | 115              | 44               | 17               | 0                | 51               | 61               | 0                 | 166               | 16               | 0                | 0                | 3                 | 62               | 46               | 2                 | 0                 | 30                | 0                 | 7    | 0                 |   |
| 2011 | 457              | 297              | 19               | 111              | 43               | 16               | 0                | 49               | 59               | 0                 | 160               | 16               | 0                | 0                | 3                 | 59               | 44               | 2                 | 0                 | 29                | 0                 | 7    | 0                 |   |
| 2012 | 440              | 286              | 19               | 107              | 41               | 15               | 0                | 47               | 57               | 0                 | 154               | 15               | 0                | 0                | 3                 | 57               | 43               | 2                 | 0                 | 28                | 0                 | 7    | 0                 |   |
| 2013 | 421              | 273              | 18               | 102              | 39               | 15               | 0                | 45               | 54               | 0                 | 148               | 14               | 0                | 0                | 3                 | 55               | 41               | 2                 | 0                 | 27                | 0                 | 6    | 0                 |   |
| 2014 | 404              | 261              | 17               | 98               | 38               | 14               | 0                | 43               | 52               | 0                 | 143               | 14               | 0                | 0                | 3                 | 53               | 40               | 2                 | 0                 | 26                | 0                 | 6    | 0                 |   |
| 2015 | 387              | 249              | 16               | 93               | 36               | 13               | 0                | 41               | 49               | 0                 | 138               | 13               | 0                | 0                | 3                 | 51               | 38               | 2                 | 0                 | 25                | 0                 | 6    | 0                 |   |
| 2000 | 890              | 441              | 11               | 173              | 59               | 58               | 0                | 32               | 108              | 0                 | 449               | 68               | 22               | 7                | 11                | 127              | 123              | 28                | 0                 | 61                | 0                 | 3    | 0                 |   |
| 2001 | 850              | 432              | 10               | 148              | 61               | 62               | 0                | 39               | 114              | 0                 | 418               | 82               | 12               | 2                | 21                | 104              | 112              | 16                | 0                 | 63                | 0                 | 6    | 0                 |   |
| 2002 | 824              | 425              | 10               | 151              | 50               | 58               | 0                | 41               | 115              | 0                 | 399               | 74               | 19               | 3                | 16                | 94               | 103              | 20                | 0                 | 65                | 0                 | 3    | 0                 |   |
| 2003 | 794              | 413              | 9                | 152              | 40               | 53               | 0                | 44               | 114              | 0                 | 381               | 71               | 15               | 3                | 16                | 90               | 102              | 19                | 0                 | 62                | 0                 | 3    | 0                 |   |
| 2004 | 766              | 397              | 9                | 152              | 30               | 49               | 0                | 45               | 113              | 0                 | 369               | 52               | 22               | 0                | 15                | 80               | 111              | 18                | 0                 | 69                | 0                 | 2    | 0                 |   |
| 2005 | 737              | 381              | 7                | 146              | 34               | 49               | 0                | 41               | 104              | 0                 | 356               | 66               | 13               | 2                | 16                | 89               | 96               | 15                | 0                 | 57                | 0                 | 0    | 0                 |   |
| 2006 | 707              | 358              | 5                | 139              | 36               | 48               | 0                | 36               | 93               | 0                 | 349               | 61               | 13               | 2                | 14                | 91               | 101              | 13                | 0                 | 54                | 0                 | 0    | 0                 |   |
| 2007 | 677              | 335              | 4                | 131              | 38               | 48               | 0                | 32               | 83               | 0                 | 342               | 72               | 0                | 2                | 22                | 88               | 83               | 13                | 0                 | 62                | 0                 | 0    | 0                 |   |
| 2008 | 658              | 323              | 4                | 120              | 36               | 37               | 0                | 20               | 107              | 0                 | 335               | 66               | 19               | 2                | 13                | 84               | 89               | 10                | 0                 | 53                | 0                 | 0    | 0                 |   |
| 2009 | 638              | 311              | 8                | 99               | 24               | 62               | 0                | 25               | 93               | 0                 | 327               | 63               | 9                | 2                | 16                | 92               | 89               | 12                | 0                 | 45                | 0                 | 0    | 0                 |   |
| 2010 | 614              | 304              | 6                | 99               | 29               | 51               | 0                | 24               | 94               | 0                 | 310               | 47               | 12               | 1                | 11                | 82               | 98               | 10                | 0                 | 46                | 0                 | 0    | 3                 |   |
| 2011 | 595              | 292              | 5                | 97               | 34               | 41               | 0                | 22               | 93               | 0                 | 303               | 41               | 12               | 1                | 9                 | 82               | 101              | 9                 | 0                 | 44                | 0                 | 0    | 4                 |   |
| 2012 | 571              | 285              | 3                | 97               | 40               | 32               | 0                | 20               | 93               | 0                 | 286               | 37               | 11               | 0                | 6                 | 77               | 109              | 4                 | 0                 | 35                | 0                 | 0    | 8                 |   |
| 2013 | 542              | 268              | 1                | 76               | 40               | 40               | 0                | 22               | 90               | 0                 | 274               | 42               | 13               | 0                | 8                 | 74               | 97               | 11                | 0                 | 42                | 0                 | 0    | 6                 |   |
| 2014 | 514              | 256              | 3                | 81               | 35               | 34               | 0                | 19               | 84               | 0                 | 258               | 30               | 11               | 0                | 7                 | 70               | 92               | 7                 | 0                 | 36                | 0                 | 0    | 5                 |   |
| 2015 | 487              | 246              | 3                | 78               | 33               | 33               | 0                | 19               | 80               | 0                 | 241               | 28               | 10               | 0                | 6                 | 65               | 86               | 7                 | 0                 | 34                | 0                 | 0    | 5                 |   |
| 2000 | 12577            | 6957             | 207              | 3112             | 1120             | 1227             | 0                | 313              | 979              | 0                 | 5620              | 807              | 57               | 13               | 235               | 1432             | 894              | 1307              | 0                 | 777               | 15                | 26   |                   |   |

Webappendix 6. Estimated numbers of deaths by cause in neonates, children aged 1-59 months at the global, regional and country levels in 2000-2015

| Year    | 0-28 days        |                  |                  |                  |                  |                  |                  |                  |                  |                   | 1-59 months       |                  |                  |                  |                   |                  |                  |                   |                   |                   |                   |      |                   |     |
|---------|------------------|------------------|------------------|------------------|------------------|------------------|------------------|------------------|------------------|-------------------|-------------------|------------------|------------------|------------------|-------------------|------------------|------------------|-------------------|-------------------|-------------------|-------------------|------|-------------------|-----|
|         | USD <sup>1</sup> | NEO <sup>2</sup> | PNE <sup>3</sup> | PRE <sup>4</sup> | INT <sup>5</sup> | SEP <sup>6</sup> | TET <sup>7</sup> | OTH <sup>8</sup> | CON <sup>9</sup> | DIA <sup>10</sup> | POS <sup>11</sup> | PNE <sup>3</sup> | PRE <sup>4</sup> | INT <sup>5</sup> | MEN <sup>12</sup> | OTH <sup>8</sup> | CON <sup>9</sup> | DIA <sup>10</sup> | MEA <sup>13</sup> | INJ <sup>14</sup> | MAL <sup>15</sup> | AIDS | PER <sup>16</sup> |     |
| Egypt   | 2004             | 21343            | 12342            | 652              | 4704             | 2681             | 1574             | 77               | 697              | 1920              | 37                | 9001             | 2689             | 397              | 118               | 300              | 2089             | 777               | 1452              | 38                | 1018              | 0    | 11                | 110 |
| Egypt   | 2005             | 21651            | 12811            | 678              | 4806             | 2789             | 1642             | 75               | 729              | 2056              | 37                | 8840             | 2644             | 396              | 118               | 294              | 2049             | 791               | 1377              | 30                | 1013              | 0    | 13                | 117 |
| Egypt   | 2006             | 22210            | 13301            | 703              | 4908             | 2902             | 1712             | 73               | 763              | 2203              | 36                | 8909             | 2664             | 402              | 121               | 295              | 2063             | 817               | 1337              | 39                | 1033              | 0    | 15                | 124 |
| Egypt   | 2007             | 22945            | 13949            | 739              | 5070             | 3047             | 1799             | 73               | 805              | 2380              | 37                | 8996             | 2691             | 409              | 123               | 298              | 2074             | 847               | 1302              | 40                | 1055              | 0    | 19                | 138 |
| Egypt   | 2008             | 23695            | 14482            | 765              | 5143             | 3173             | 1912             | 69               | 850              | 2535              | 37                | 9213             | 2292             | 461              | 140               | 197              | 2332             | 963               | 1410              | 50                | 1197              | 0    | 17                | 155 |
| Egypt   | 2009             | 24328            | 15013            | 790              | 5171             | 3301             | 2070             | 63               | 906              | 2677              | 36                | 9315             | 2310             | 469              | 144               | 197              | 2361             | 990               | 1381              | 58                | 1225              | 0    | 15                | 165 |
| Egypt   | 2010             | 24692            | 15299            | 798              | 5065             | 3373             | 2252             | 54               | 964              | 2758              | 34                | 9393             | 2335             | 473              | 147               | 199              | 2384             | 1001              | 1350              | 67                | 1250              | 0    | 13                | 174 |
| Egypt   | 2011             | 24930            | 15474            | 801              | 4988             | 3414             | 2372             | 48               | 1009             | 2810              | 33                | 9456             | 2352             | 476              | 151               | 200              | 2401             | 1023              | 1316              | 75                | 1266              | 0    | 17                | 178 |
| Egypt   | 2012             | 25026            | 15456            | 796              | 4915             | 3407             | 2410             | 45               | 1027             | 2824              | 31                | 9570             | 2383             | 482              | 156               | 202              | 2438             | 1047              | 1293              | 80                | 1289              | 0    | 21                | 178 |
| Egypt   | 2013             | 24984            | 15340            | 789              | 4878             | 3375             | 2383             | 43               | 1020             | 2820              | 31                | 9644             | 2405             | 488              | 158               | 204              | 2465             | 1068              | 1267              | 91                | 1304              | 0    | 15                | 179 |
| Egypt   | 2014             | 24676            | 15138            | 777              | 4824             | 3322             | 2343             | 42               | 1007             | 2792              | 30                | 9538             | 2395             | 488              | 158               | 203              | 2458             | 1074              | 1226              | 26                | 1302              | 0    | 30                | 178 |
| Egypt   | 2015             | 24269            | 14773            | 756              | 4727             | 3232             | 2279             | 41               | 982              | 2727              | 29                | 9496             | 2389             | 489              | 159               | 202              | 2454             | 1082              | 1189              | 25                | 1300              | 0    | 30                | 177 |
| Egypt   | 2000             | 80229            | 38142            | 3403             | 16869            | 8049             | 1515             | 1059             | 2357             | 4890              | 0                 | 42087            | 12142            | 1861             | 465               | 661              | 8438             | 5901              | 6960              | 2460              | 2891              | 0    | 6                 | 301 |
| Egypt   | 2001             | 77381            | 37842            | 3201             | 16576            | 7910             | 1611             | 1001             | 2357             | 5187              | 0                 | 39539            | 11214            | 1846             | 461               | 613              | 8110             | 5808              | 6239              | 2066              | 2877              | 0    | 7                 | 299 |
| Egypt   | 2002             | 74203            | 37705            | 3050             | 16352            | 7802             | 1737             | 887              | 2395             | 5482              | 0                 | 36498            | 10345            | 1813             | 453               | 566              | 7810             | 5677              | 5752              | 925               | 2849              | 0    | 8                 | 299 |
| Egypt   | 2003             | 71526            | 37629            | 2926             | 16163            | 7711             | 1828             | 789              | 2447             | 5765              | 0                 | 33897            | 9536             | 1778             | 444               | 523              | 7479             | 5531              | 5279              | 212               | 2813              | 0    | 9                 | 292 |
| Egypt   | 2004             | 69555            | 37117            | 2780             | 15792            | 7533             | 1894             | 679              | 2477             | 5962              | 0                 | 32438            | 8905             | 1758             | 440               | 489              | 7243             | 5441              | 4896              | 153               | 2812              | 0    | 10                | 292 |
| Egypt   | 2005             | 67458            | 36696            | 2646             | 15475            | 7381             | 1917             | 623              | 2498             | 6156              | 0                 | 30762            | 8248             | 1724             | 431               | 454              | 6936             | 5308              | 4447              | 121               | 2790              | 0    | 11                | 292 |
| Egypt   | 2006             | 65666            | 35636            | 2475             | 14921            | 7116             | 1854             | 613              | 2450             | 6207              | 0                 | 30030            | 7719             | 1700             | 425               | 427              | 6733             | 5228              | 4095              | 587               | 2803              | 0    | 12                | 299 |
| Egypt   | 2007             | 63953            | 33888            | 2273             | 14090            | 6719             | 1727             | 623              | 2351             | 6104              | 0                 | 30065            | 7257             | 1683             | 421               | 405              | 6583             | 5177              | 3800              | 1589              | 2830              | 0    | 13                | 308 |
| Egypt   | 2008             | 60716            | 32428            | 2094             | 13345            | 6365             | 1639             | 611              | 2360             | 6014              | 0                 | 28288            | 6792             | 1654             | 414               | 381              | 6398             | 5093              | 3541              | 839               | 2838              | 0    | 15                | 323 |
| Egypt   | 2009             | 59103            | 31520            | 1971             | 12824            | 6117             | 1593             | 600              | 2408             | 6007              | 0                 | 27583            | 6480             | 1656             | 414               | 364              | 6329             | 5089              | 3376              | 647               | 2876              | 0    | 17                | 335 |
| Egypt   | 2010             | 58411            | 31379            | 1912             | 12637            | 6029             | 1618             | 568              | 2501             | 6115              | 0                 | 27032            | 6305             | 1693             | 423               | 354              | 6393             | 5176              | 3328              | 64                | 2938              | 0    | 18                | 342 |
| Egypt   | 2011             | 59907            | 32414            | 1934             | 12891            | 6150             | 1716             | 547              | 2717             | 6459              | 0                 | 27493            | 6257             | 1762             | 441               | 348              | 6552             | 5343              | 3344              | 57                | 3022              | 0    | 19                | 348 |
| Egypt   | 2012             | 62548            | 33980            | 1991             | 13350            | 6370             | 1800             | 573              | 2990             | 6905              | 0                 | 28568            | 6342             | 1882             | 470               | 349              | 6844             | 5630              | 3416              | 111               | 3147              | 0    | 21                | 355 |
| Egypt   | 2013             | 65368            | 35645            | 2058             | 13831            | 6601             | 1886             | 601              | 3290             | 7378              | 0                 | 29723            | 6464             | 2021             | 505               | 351              | 7105             | 5943              | 3425              | 246               | 3272              | 0    | 22                | 367 |
| Egypt   | 2014             | 66378            | 36401            | 2069             | 13949            | 6658             | 1919             | 614              | 3519             | 7672              | 0                 | 29977            | 6449             | 2125             | 531               | 345              | 7201             | 6141              | 3366              | 101               | 3320              | 0    | 25                | 372 |
| Egypt   | 2015             | 65775            | 35818            | 2014             | 13569            | 6476             | 1877             | 604              | 3619             | 7658              | 0                 | 29957            | 6362             | 2193             | 548               | 335              | 7191             | 6237              | 3271              | 98                | 3326              | 0    | 25                | 372 |
| Libya   | 2000             | 3351             | 1813             | 67               | 746              | 357              | 139              | 0                | 143              | 361               | 0                 | 1538             | 302              | 14               | 4                 | 28               | 447              | 302               | 99                | 0                 | 323               | 0    | 0                 | 19  |
| Libya   | 2001             | 3311             | 1795             | 66               | 730              | 349              | 138              | 0                | 149              | 364               | 0                 | 1516             | 290              | 13               | 4                 | 27               | 441              | 299               | 95                | 0                 | 328               | 0    | 0                 | 20  |
| Libya   | 2002             | 3238             | 1746             | 64               | 707              | 332              | 135              | 0                | 147              | 360               | 0                 | 1492             | 277              | 13               | 4                 | 26               | 433              | 297               | 90                | 0                 | 332               | 0    | 0                 | 21  |
| Libya   | 2003             | 3126             | 1690             | 60               | 684              | 314              | 132              | 0                | 144              | 356               | 0                 | 1436             | 259              | 13               | 4                 | 24               | 418              | 289               | 81                | 0                 | 327               | 0    | 0                 | 21  |
| Libya   | 2004             | 3013             | 1628             | 56               | 656              | 295              | 128              | 0                | 140              | 352               | 0                 | 1385             | 243              | 13               | 4                 | 23               | 403              | 284               | 72                | 0                 | 323               | 0    | 0                 | 22  |
| Libya   | 2005             | 2901             | 1567             | 52               | 628              | 277              | 123              | 0                | 138              | 349               | 0                 | 1334             | 226              | 13               | 4                 | 21               | 389              | 278               | 64                | 0                 | 317               | 0    | 0                 | 23  |
| Libya   | 2006             | 2811             | 1527             | 49               | 608              | 263              | 120              | 0                | 137              | 351               | 0                 | 1284             | 209              | 12               | 3                 | 20               | 376              | 273               | 57                | 0                 | 310               | 0    | 0                 | 23  |
| Libya   | 2007             | 2717             | 1466             | 45               | 579              | 247              | 113              | 0                | 134              | 348               | 0                 | 1251             | 186              | 16               | 4                 | 23               | 379              | 278               | 50                | 0                 | 292               | 0    | 0                 | 23  |
| Libya   | 2008             | 2621             | 1422             | 42               | 558              | 234              | 107              | 0                | 132              | 347               | 0                 | 1199             | 170              | 19               | 5                 | 22               | 358              | 282               | 46                | 0                 | 275               | 0    | 0                 | 23  |
| Libya   | 2009             | 2512             | 1369             | 40               | 535              | 221              | 101              | 0                | 129              | 342               | 0                 | 1143             | 158              | 19               | 5                 | 20               | 338              | 275               | 44                | 0                 | 261               | 0    | 0                 | 23  |
| Libya   | 2010             | 2378             | 1286             | 38               | 502              | 204              | 93               | 0                | 123              | 327               | 0                 | 1092             | 149              | 19               | 5                 | 18               | 319              | 269               | 43                | 0                 | 247               | 0    | 0                 | 23  |
| Libya   | 2011             | 2503             | 1218             | 37               | 473              | 190              | 86               | 0                | 118              | 313               | 0                 | 1285             | 144              | 20               | 6                 | 17               | 304              | 265               | 43                | 0                 | 465               | 0    | 0                 | 22  |
| Libya   | 2012             | 2101             | 1127             | 34               | 438              | 174              | 78               | 0                | 110              | 293               | 0                 | 974              | 131              | 19               | 5                 | 15               | 278              | 249               | 40                | 0                 | 214               | 0    | 0                 | 22  |
| Libya   | 2013             | 1946             | 1042             | 32               | 404              | 159              | 70               | 0                | 103              | 273               | 0                 | 904              | 120              | 18               | 5                 | 14               | 257              | 235               | 38                | 0                 | 197               | 0    | 0                 | 20  |
| Libya   | 2014             | 1797             | 962              | 29               | 373              | 146              | 63               | 0                | 96               | 255               | 0                 | 835              | 109              | 17               | 5                 | 12               | 238              | 221               | 35                | 0                 | 180               | 0    | 0                 | 19  |
| Libya   | 2015             | 1684             | 894              | 26               | 346              | 135              | 57               | 0                | 91               | 239               | 0                 | 790              | 101              | 16               | 5                 | 11               | 226              | 212               | 32                | 0                 | 170               | 0    | 0                 | 18  |
| Morocco | 2000             | 30721            | 16765            | 985              | 5632             | 4021             | 2992             | 209              | 1060             | 1749              | 116               | 13956            | 4341             | 471              | 276               | 649              | 2787             | 940               | 2811              | 58                | 1483              | 0    | 31                | 109 |
| Morocco | 2001             | 28853            | 16102            | 927              | 5342             | 3805             | 3008             | 159              | 1036             | 1721              | 104               | 12751            | 3988             | 436              | 252               | 591              | 2581             | 870               | 2483              | 30                | 1381              | 0    | 33                | 107 |
| Morocco | 2002             | 27277            | 15542            | 880              | 5156             | 3617             | 2950             | 132              | 1007             | 1704              | 95                | 11735            | 3677             | 405              | 231               | 539              | 2398             | 808               | 2202              | 44                | 1291              | 0    | 35                | 105 |
| Morocco | 2003             | 26084            | 15133            | 845              | 5079             | 3471             | 2855             | 119              | 975              | 1699              | 90                | 10951            | 3430             | 380              | 215               | 497              | 2251             | 760               | 1977              | 80                | 1219              | 0    | 37                | 107 |
| Morocco | 2004             | 25154            | 14907            | 822              | 5033             | 3370             | 2823             | 106              | 957              | 1712              | 84                | 10247            | 3226             | 360              | 201               | 462              | 2135             | 720               | 1790              | 50                | 1161              | 0    | 38                | 104 |
| Morocco | 2005             | 24433            | 14776            | 804              | 4995             | 3298             | 2817             | 96               | 950              | 1737              | 80                | 9657             | 3051             | 342              | 189               | 433              | 2035             | 681               | 1631              | 44                | 1111              | 0    | 36                | 104 |
| Morocco | 2006             | 23888            | 14782            | 795              | 4998             | 3264             | 2829             | 88               | 951              | 1780              | 76                | 9106             | 2894             | 324              | 179               | 406              | 1943             | 646               | 1491              | 17                | 1066              | 0    | 35                | 104 |
| Morocco | 2007             | 23510            | 14798            | 789              | 4997             | 3241             | 2834             | 82               | 954              | 1827              | 74                | 8712             | 2329             | 345              | 190               | 254              | 2085             | 685               | 1524              | 17                | 1143              | 0    | 35                | 105 |
| Morocco | 2008             | 23175            | 14842            | 789              | 5002             | 3230             | 2830             | 77               | 958              | 1884              | 72                | 8333             | 2290             | 334              | 183               | 230              | 2035             | 663               | 1422              | 15                | 1119              | 0    | 33                | 103 |
| Morocco | 2009             | 22936            | 14798            | 786              | 4973             | 3213             | 2790             | 73               | 959              | 1933              | 70                | 8138             | 2156             | 327              | 178               | 224              | 2011             | 642               | 1348              | 5                 | 1110              | 0    | 30                | 106 |
| Morocco | 2010             | 22552            | 14619            | 777              | 4889             | 3173             | 2714             | 68               | 954              | 1974              | 68                | 7933             | 2105             | 320              | 173               | 217              | 1981             | 624               | 1268              | 7                 | 1100              | 0    | 27                | 111 |
| Morocco | 2011             | 22189            | 14336            | 764              | 4775             | 3114             | 2615             | 63               | 942              | 1997              | 66                | 7853             | 2042             | 336              | 180               | 197              | 2090             | 649               | 1040              | 9                 | 1164              | 0    | 26                | 120 |
| Morocco | 2012             | 21733            | 14069            | 749              | 4669             | 3051             | 2531             | 59               | 930              | 2016              | 63                | 7664             | 1762             | 348              | 185               | 138              | 2173             | 667               | 1015              | 9                 | 1216              | 0    | 23                | 130 |
| Morocco | 2013             | 21279            | 13715            | 728              | 4554             | 2962             |                  |                  |                  |                   |                   |                  |                  |                  |                   |                  |                  |                   |                   |                   |                   |      |                   |     |

Webappendix 6. Estimated numbers of deaths by cause in neonates, children aged 1-59 months at the global, regional and country levels in 2000-2015

| Year                             | 0-28 days        |                  |                  |                  |                  |                  |                  |                  |                  |                   |                   | 1-59 months      |                  |                  |                   |                  |                  |                   |                   |                   |                   |      |                   |   |
|----------------------------------|------------------|------------------|------------------|------------------|------------------|------------------|------------------|------------------|------------------|-------------------|-------------------|------------------|------------------|------------------|-------------------|------------------|------------------|-------------------|-------------------|-------------------|-------------------|------|-------------------|---|
|                                  | USD <sup>1</sup> | NEO <sup>2</sup> | PNE <sup>3</sup> | PRE <sup>4</sup> | INT <sup>5</sup> | SEP <sup>6</sup> | TET <sup>7</sup> | OTH <sup>8</sup> | CON <sup>9</sup> | DIA <sup>10</sup> | POS <sup>11</sup> | PNE <sup>3</sup> | PRE <sup>4</sup> | INT <sup>5</sup> | MEN <sup>12</sup> | OTH <sup>8</sup> | CON <sup>9</sup> | DIA <sup>10</sup> | MEA <sup>13</sup> | INJ <sup>14</sup> | MAL <sup>15</sup> | AIDS | PER <sup>16</sup> |   |
| Fiji                             | 2015             | 3                | 2                | 0                | 1                | 0                | 0                | 0                | 0                | 1                 | 0                 | 1                | 0                | 0                | 0                 | 0                | 0                | 0                 | 0                 | 0                 | 0                 | 0    | 0                 | 0 |
| Fiji                             | 2000             | 484              | 271              | 11               | 100              | 42               | 30               | 2                | 34               | 52                | 0                 | 213              | 42               | 5                | 3                 | 10               | 46               | 38                | 23                | 9                 | 34                | 0    | 1                 | 3 |
| Fiji                             | 2001             | 466              | 264              | 10               | 97               | 41               | 29               | 2                | 33               | 51                | 0                 | 202              | 41               | 5                | 3                 | 9                | 46               | 37                | 21                | 4                 | 33                | 0    | 1                 | 3 |
| Fiji                             | 2002             | 474              | 259              | 10               | 96               | 40               | 29               | 1                | 32               | 50                | 0                 | 215              | 39               | 5                | 3                 | 9                | 45               | 37                | 19                | 21                | 33                | 0    | 1                 | 3 |
| Fiji                             | 2003             | 467              | 253              | 10               | 94               | 39               | 29               | 1                | 31               | 50                | 0                 | 214              | 39               | 5                | 3                 | 9                | 46               | 37                | 18                | 19                | 34                | 0    | 1                 | 3 |
| Fiji                             | 2004             | 454              | 248              | 10               | 93               | 38               | 28               | 1                | 30               | 49                | 0                 | 206              | 40               | 6                | 3                 | 9                | 48               | 39                | 18                | 5                 | 36                | 0    | 1                 | 3 |
| Fiji                             | 2005             | 456              | 242              | 10               | 91               | 37               | 27               | 1                | 29               | 48                | 0                 | 214              | 41               | 6                | 3                 | 9                | 50               | 41                | 18                | 5                 | 38                | 0    | 1                 | 3 |
| Fiji                             | 2006             | 461              | 228              | 10               | 86               | 34               | 25               | 1                | 26               | 45                | 0                 | 233              | 44               | 7                | 3                 | 10               | 54               | 44                | 18                | 7                 | 42                | 0    | 1                 | 3 |
| Fiji                             | 2007             | 457              | 214              | 10               | 82               | 32               | 23               | 1                | 24               | 42                | 0                 | 243              | 46               | 7                | 4                 | 10               | 58               | 47                | 19                | 1                 | 47                | 0    | 1                 | 3 |
| Fiji                             | 2008             | 460              | 207              | 10               | 79               | 31               | 22               | 1                | 23               | 41                | 0                 | 253              | 47               | 8                | 4                 | 11               | 61               | 49                | 19                | 1                 | 50                | 0    | 1                 | 3 |
| Fiji                             | 2009             | 460              | 201              | 10               | 77               | 30               | 21               | 1                | 22               | 40                | 0                 | 259              | 48               | 8                | 4                 | 11               | 64               | 49                | 19                | 0                 | 52                | 0    | 1                 | 3 |
| Fiji                             | 2010             | 455              | 197              | 10               | 76               | 29               | 21               | 1                | 21               | 39                | 0                 | 258              | 47               | 8                | 4                 | 10               | 64               | 49                | 19                | 0                 | 53                | 0    | 1                 | 3 |
| Fiji                             | 2011             | 447              | 194              | 9                | 75               | 29               | 20               | 1                | 20               | 39                | 0                 | 253              | 46               | 8                | 4                 | 10               | 63               | 49                | 18                | 0                 | 52                | 0    | 1                 | 3 |
| Fiji                             | 2012             | 435              | 188              | 9                | 73               | 28               | 20               | 1                | 20               | 38                | 0                 | 247              | 44               | 8                | 4                 | 10               | 61               | 48                | 18                | 0                 | 52                | 0    | 0                 | 3 |
| Fiji                             | 2013             | 419              | 179              | 9                | 69               | 26               | 19               | 1                | 18               | 36                | 0                 | 240              | 43               | 8                | 4                 | 9                | 60               | 47                | 17                | 0                 | 50                | 0    | 0                 | 3 |
| Fiji                             | 2014             | 404              | 171              | 8                | 66               | 25               | 18               | 1                | 18               | 35                | 0                 | 233              | 41               | 8                | 4                 | 9                | 58               | 45                | 16                | 0                 | 49                | 0    | 0                 | 3 |
| Kiribati                         | 2015             | 388              | 164              | 8                | 64               | 24               | 17               | 1                | 17               | 34                | 0                 | 224              | 39               | 8                | 4                 | 8                | 56               | 44                | 16                | 0                 | 47                | 0    | 0                 | 3 |
| Kiribati                         | 2000             | 181              | 75               | 5                | 24               | 22               | 10               | 1                | 6                | 7                 | 0                 | 106              | 32               | 3                | 3                 | 6                | 24               | 7                 | 22                | 0                 | 10                | 0    | 0                 | 0 |
| Kiribati                         | 2001             | 167              | 68               | 4                | 22               | 19               | 9                | 1                | 5                | 7                 | 0                 | 99               | 30               | 2                | 3                 | 5                | 22               | 7                 | 20                | 0                 | 9                 | 0    | 0                 | 0 |
| Kiribati                         | 2002             | 150              | 59               | 4                | 19               | 17               | 8                | 1                | 4                | 6                 | 0                 | 91               | 28               | 2                | 3                 | 5                | 21               | 6                 | 18                | 0                 | 9                 | 0    | 0                 | 0 |
| Kiribati                         | 2003             | 133              | 51               | 3                | 17               | 14               | 7                | 1                | 4                | 5                 | 0                 | 82               | 25               | 2                | 2                 | 4                | 19               | 6                 | 16                | 1                 | 8                 | 0    | 0                 | 0 |
| Kiribati                         | 2004             | 122              | 46               | 3                | 15               | 13               | 7                | 0                | 3                | 5                 | 0                 | 76               | 23               | 2                | 2                 | 4                | 18               | 5                 | 14                | 1                 | 7                 | 0    | 0                 | 0 |
| Kiribati                         | 2005             | 124              | 46               | 3                | 15               | 13               | 7                | 0                | 3                | 5                 | 0                 | 78               | 24               | 2                | 2                 | 4                | 18               | 6                 | 14                | 0                 | 8                 | 0    | 0                 | 0 |
| Kiribati                         | 2006             | 135              | 52               | 3                | 17               | 14               | 8                | 0                | 4                | 5                 | 0                 | 83               | 25               | 2                | 2                 | 4                | 19               | 6                 | 14                | 2                 | 8                 | 0    | 0                 | 0 |
| Kiribati                         | 2007             | 156              | 64               | 4                | 21               | 17               | 9                | 1                | 5                | 7                 | 0                 | 92               | 29               | 2                | 3                 | 5                | 22               | 7                 | 16                | 0                 | 9                 | 0    | 0                 | 0 |
| Kiribati                         | 2008             | 182              | 76               | 5                | 25               | 21               | 11               | 1                | 6                | 8                 | 0                 | 106              | 28               | 3                | 3                 | 4                | 28               | 9                 | 20                | 0                 | 11                | 0    | 0                 | 0 |
| Kiribati                         | 2009             | 203              | 87               | 5                | 28               | 24               | 13               | 1                | 7                | 9                 | 0                 | 116              | 31               | 3                | 4                 | 4                | 31               | 9                 | 21                | 0                 | 13                | 0    | 0                 | 0 |
| Kiribati                         | 2010             | 214              | 93               | 6                | 30               | 25               | 14               | 1                | 8                | 10                | 0                 | 121              | 32               | 3                | 4                 | 4                | 32               | 10                | 21                | 0                 | 13                | 0    | 0                 | 0 |
| Kiribati                         | 2011             | 214              | 91               | 6                | 29               | 24               | 14               | 1                | 7                | 10                | 0                 | 123              | 32               | 4                | 4                 | 4                | 33               | 10                | 21                | 0                 | 14                | 0    | 0                 | 0 |
| Kiribati                         | 2012             | 204              | 86               | 5                | 27               | 23               | 13               | 1                | 7                | 9                 | 0                 | 118              | 31               | 3                | 4                 | 4                | 32               | 10                | 20                | 0                 | 13                | 0    | 0                 | 0 |
| Kiribati                         | 2013             | 188              | 79               | 5                | 25               | 21               | 12               | 0                | 7                | 9                 | 0                 | 109              | 26               | 3                | 4                 | 3                | 31               | 9                 | 19                | 0                 | 13                | 0    | 0                 | 0 |
| Kiribati                         | 2014             | 173              | 72               | 4                | 23               | 19               | 11               | 0                | 6                | 8                 | 0                 | 101              | 25               | 3                | 4                 | 3                | 29               | 9                 | 17                | 0                 | 12                | 0    | 0                 | 0 |
| Marshall Islands                 | 2015             | 162              | 67               | 4                | 21               | 18               | 10               | 0                | 6                | 8                 | 0                 | 95               | 23               | 3                | 3                 | 3                | 28               | 8                 | 15                | 0                 | 12                | 0    | 0                 | 0 |
| Marshall Islands                 | 2000             | 88               | 41               | 3                | 15               | 10               | 5                | 0                | 3                | 6                 | 0                 | 47               | 13               | 2                | 1                 | 2                | 11               | 4                 | 9                 | 0                 | 5                 | 0    | 0                 | 0 |
| Marshall Islands                 | 2001             | 87               | 41               | 2                | 15               | 10               | 5                | 0                | 3                | 6                 | 0                 | 46               | 13               | 2                | 1                 | 2                | 11               | 4                 | 9                 | 0                 | 5                 | 0    | 0                 | 0 |
| Marshall Islands                 | 2002             | 85               | 39               | 2                | 14               | 9                | 5                | 0                | 3                | 5                 | 0                 | 46               | 12               | 2                | 1                 | 1                | 12               | 4                 | 9                 | 0                 | 5                 | 0    | 0                 | 0 |
| Marshall Islands                 | 2003             | 84               | 38               | 2                | 14               | 9                | 5                | 0                | 2                | 5                 | 0                 | 46               | 11               | 2                | 1                 | 1                | 11               | 4                 | 8                 | 3                 | 5                 | 0    | 0                 | 0 |
| Marshall Islands                 | 2004             | 79               | 36               | 2                | 13               | 8                | 5                | 0                | 2                | 5                 | 0                 | 43               | 12               | 2                | 1                 | 2                | 11               | 4                 | 8                 | 0                 | 5                 | 0    | 0                 | 0 |
| Marshall Islands                 | 2005             | 76               | 35               | 2                | 13               | 8                | 5                | 0                | 2                | 5                 | 0                 | 41               | 11               | 2                | 1                 | 1                | 10               | 4                 | 7                 | 0                 | 5                 | 0    | 0                 | 0 |
| Marshall Islands                 | 2006             | 73               | 33               | 2                | 12               | 7                | 5                | 0                | 2                | 4                 | 0                 | 40               | 11               | 2                | 1                 | 1                | 10               | 4                 | 7                 | 0                 | 5                 | 0    | 0                 | 0 |
| Marshall Islands                 | 2007             | 70               | 31               | 2                | 11               | 7                | 4                | 0                | 2                | 4                 | 0                 | 39               | 10               | 2                | 1                 | 1                | 10               | 4                 | 7                 | 0                 | 5                 | 0    | 0                 | 0 |
| Marshall Islands                 | 2008             | 67               | 30               | 2                | 11               | 7                | 4                | 0                | 2                | 4                 | 0                 | 37               | 9                | 1                | 1                 | 1                | 10               | 3                 | 6                 | 0                 | 5                 | 0    | 0                 | 0 |
| Marshall Islands                 | 2009             | 64               | 29               | 2                | 11               | 6                | 4                | 0                | 2                | 4                 | 0                 | 35               | 8                | 1                | 1                 | 1                | 10               | 3                 | 5                 | 0                 | 5                 | 0    | 0                 | 0 |
| Marshall Islands                 | 2010             | 62               | 28               | 2                | 10               | 6                | 4                | 0                | 2                | 4                 | 0                 | 34               | 8                | 1                | 1                 | 1                | 9                | 3                 | 5                 | 0                 | 4                 | 0    | 0                 | 0 |
| Marshall Islands                 | 2011             | 60               | 27               | 2                | 10               | 6                | 4                | 0                | 2                | 4                 | 0                 | 33               | 8                | 1                | 1                 | 1                | 9                | 3                 | 5                 | 0                 | 4                 | 0    | 0                 | 0 |
| Marshall Islands                 | 2012             | 58               | 26               | 1                | 10               | 6                | 4                | 0                | 2                | 4                 | 0                 | 32               | 8                | 1                | 1                 | 1                | 9                | 3                 | 5                 | 0                 | 4                 | 0    | 0                 | 0 |
| Marshall Islands                 | 2013             | 56               | 25               | 1                | 9                | 5                | 4                | 0                | 2                | 3                 | 0                 | 31               | 8                | 1                | 1                 | 1                | 9                | 3                 | 4                 | 0                 | 4                 | 0    | 0                 | 0 |
| Marshall Islands                 | 2014             | 53               | 24               | 1                | 9                | 5                | 3                | 0                | 2                | 3                 | 0                 | 29               | 8                | 1                | 1                 | 1                | 8                | 3                 | 4                 | 0                 | 4                 | 0    | 0                 | 0 |
| Marshall Islands                 | 2015             | 49               | 23               | 1                | 8                | 5                | 3                | 0                | 2                | 3                 | 0                 | 26               | 7                | 1                | 1                 | 1                | 7                | 2                 | 3                 | 0                 | 3                 | 0    | 0                 | 0 |
| Micronesia (Federated States of) | 2000             | 175              | 84               | 5                | 31               | 22               | 8                | 1                | 6                | 10                | 1                 | 91               | 24               | 3                | 2                 | 3                | 22               | 6                 | 18                | 1                 | 10                | 0    | 0                 | 1 |
| Micronesia (Federated States of) | 2001             | 167              | 80               | 5                | 29               | 21               | 8                | 1                | 6                | 10                | 1                 | 87               | 23               | 3                | 2                 | 3                | 21               | 6                 | 17                | 1                 | 10                | 0    | 0                 | 1 |
| Micronesia (Federated States of) | 2002             | 157              | 76               | 5                | 28               | 19               | 8                | 1                | 6                | 9                 | 1                 | 81               | 22               | 3                | 2                 | 3                | 20               | 6                 | 15                | 1                 | 9                 | 0    | 0                 | 1 |
| Micronesia (Federated States of) | 2003             | 147              | 71               | 4                | 26               | 18               | 8                | 1                | 5                | 9                 | 1                 | 76               | 21               | 3                | 2                 | 3                | 19               | 5                 | 14                | 1                 | 9                 | 0    | 0                 | 0 |
| Micronesia (Federated States of) | 2004             | 138              | 67               | 4                | 24               | 16               | 8                | 1                | 5                | 8                 | 1                 | 71               | 19               | 2                | 2                 | 3                | 17               | 5                 | 13                | 1                 | 8                 | 0    | 0                 | 1 |
| Micronesia (Federated States of) | 2005             | 129              | 63               | 4                | 23               | 15               | 7                | 0                | 5                | 8                 | 0                 | 66               | 18               | 2                | 2                 | 2                | 17               | 5                 | 11                | 1                 | 8                 | 0    | 0                 | 0 |
| Micronesia (Federated States of) | 2006             | 121              | 60               | 4                | 22               | 14               | 7                | 0                | 4                | 8                 | 0                 | 61               | 17               | 2                | 1                 | 2                | 16               | 4                 | 10                | 1                 | 7                 | 0    | 0                 | 0 |
| Micronesia (Federated States of) | 2007             | 115              | 58               | 4                | 21               | 14               | 7                | 0                | 4                | 8                 | 0                 | 57               | 15               | 2                | 1                 | 2                | 15               | 4                 | 9                 | 1                 | 7                 | 0    | 0                 | 0 |
| Micronesia (Federated States of) | 2008             | 109              | 55               | 3                | 20               | 13               | 7                | 0                | 4                | 7                 | 0                 | 54               | 15               | 2                | 1                 | 2                | 14               | 4                 | 9                 | 1                 | 7                 | 0    | 0                 | 0 |
| Micronesia (Federated States of) | 2009             | 105              | 54               | 3                | 19               | 13               | 7                | 0                | 4                | 7                 | 0                 | 51               | 14               | 2                | 1                 | 2                | 14               | 4                 | 8                 | 1                 | 6                 | 0    | 0                 | 0 |
| Micronesia (Federated States of) | 2010             | 101              | 52               | 3                | 18               | 12               | 7                | 0                | 4                | 7                 | 0                 | 49               | 12               | 2                | 1                 | 1                | 14               | 4                 | 7                 | 1                 | 7                 | 0    | 0                 | 0 |
| Micronesia (Federated States of) | 2011             | 96               | 51               | 3                | 18               | 12               | 7                | 0                | 4                | 7                 | 0                 | 45               | 11               | 2                | 1                 | 1                | 13               | 4                 | 7                 | 0                 | 6                 | 0    | 0                 | 0 |
| Micronesia (Federated States of) | 2012             | 93               | 49               | 3                | 17               | 11               | 7                | 0                | 4                | 7                 | 0                 | 44               | 11               | 2                | 1                 | 1                | 13               | 4                 | 6                 | 0                 | 6                 | 0    | 0                 | 0 |
| Micronesia (Federated States of) | 2013             | 90               | 48               | 3                | 16               | 11               | 6                | 0                | 4                | 7                 | 0                 | 42               | 10               | 2                | 1                 | 1                | 12               | 3                 | 6                 | 0                 | 6                 | 0    | 0                 | 0 |
| Micronesia (Federated States of) | 2014             | 87               | 47               | 3                | 16               | 11               | 6                | 0                | 4                | 7                 | 0                 | 40               | 10               | 2                | 1                 | 1                | 12               | 3                 | 5                 | 0                 | 6                 | 0    | 0                 | 0 |
| Micronesia (Federated States of) | 2015             | 85               | 46               | 3                | 16               | 11               | 6                | 0                | 4                | 7                 | 0                 | 39               | 10               | 2                | 1                 | 1                | 12               | 3                 | 5                 | 0                 | 6                 | 0    | 0                 | 0 |
| Nauru                            | 2000             | 7                | 4                | 0                | 1                | 1                | 0                | 0                | 0                | 1                 | 0                 | 3                | 1                | 0                | 0                 | 0                | 1                | 0                 | 1                 | 0                 | 0                 | 0    | 0                 | 0 |
| Nauru                            | 2001             | 7                | 4                | 0                | 1                | 1                | 0                | 0                | 0                | 1                 | 0                 | 3                | 1                | 0                | 0                 | 0                | 1                | 0                 | 1                 | 0                 | 0                 | 0    | 0                 | 0 |
| Nauru                            | 2002             | 7                | 4                | 0                | 1                | 1                | 0                | 0                | 0                | 1                 | 0                 | 3                | 1                | 0                | 0                 | 0                | 1                | 0                 | 1                 | 0                 | 0                 | 0    | 0                 | 0 |
| Nauru                            | 2003             | 7                | 4                | 0                | 1                | 1                | 1                | 0                | 0                | 1                 | 0                 | 3                | 1                | 0                | 0                 | 0                | 1                | 0                 | 1                 | 0                 | 0                 | 0    | 0                 | 0 |
| Nauru                            | 2004             | 7                | 4                | 0                | 1                | 1                | 1                | 0                | 0                | 1                 | 0                 | 3                | 1                | 0                | 0                 | 0                | 1                | 0                 | 1                 | 0                 | 0                 | 0    | 0                 |   |

Webappendix 6. Estimated numbers of deaths by cause in neonates, children aged 1-59 months at the global, regional and country levels in 2000-2015

| Year             | 0-28 days        |                  |                  |                  |                  |                  |                  |                  |                  |                   |                   | 1-59 months      |                  |                  |                   |                  |                  |                   |                   |                   |                   |      |                   |     |
|------------------|------------------|------------------|------------------|------------------|------------------|------------------|------------------|------------------|------------------|-------------------|-------------------|------------------|------------------|------------------|-------------------|------------------|------------------|-------------------|-------------------|-------------------|-------------------|------|-------------------|-----|
|                  | USD <sup>1</sup> | NEO <sup>2</sup> | PNE <sup>3</sup> | PRE <sup>4</sup> | INT <sup>5</sup> | SEP <sup>6</sup> | TET <sup>7</sup> | OTH <sup>8</sup> | CON <sup>9</sup> | DIA <sup>10</sup> | POS <sup>11</sup> | PNE <sup>3</sup> | PRE <sup>4</sup> | INT <sup>5</sup> | MEN <sup>12</sup> | OTH <sup>8</sup> | CON <sup>9</sup> | DIA <sup>10</sup> | MEA <sup>13</sup> | INJ <sup>14</sup> | MAL <sup>15</sup> | AIDS | PER <sup>16</sup> |     |
| 2010             | 6                | 2                | 0                | 1                | 0                | 0                | 0                | 0                | 0                | 0                 | 4                 | 0                | 0                | 0                | 0                 | 1                | 0                | 0                 | 1                 | 1                 | 0                 | 0    | 0                 | 0   |
| 2011             | 5                | 2                | 0                | 1                | 0                | 0                | 0                | 0                | 0                | 0                 | 3                 | 0                | 0                | 0                | 0                 | 1                | 1                | 0                 | 0                 | 1                 | 0                 | 0    | 0                 | 0   |
| 2012             | 5                | 2                | 0                | 1                | 0                | 0                | 0                | 0                | 0                | 0                 | 3                 | 0                | 0                | 0                | 0                 | 1                | 1                | 0                 | 0                 | 1                 | 0                 | 0    | 0                 | 0   |
| 2013             | 5                | 3                | 0                | 1                | 0                | 0                | 0                | 0                | 0                | 1                 | 2                 | 0                | 0                | 0                | 0                 | 0                | 0                | 0                 | 0                 | 1                 | 0                 | 0    | 0                 | 0   |
| 2014             | 5                | 3                | 0                | 1                | 0                | 0                | 0                | 0                | 0                | 1                 | 2                 | 0                | 0                | 0                | 0                 | 0                | 0                | 0                 | 0                 | 1                 | 0                 | 0    | 0                 | 0   |
| 2015             | 5                | 3                | 0                | 1                | 0                | 0                | 0                | 0                | 0                | 1                 | 2                 | 0                | 0                | 0                | 0                 | 0                | 0                | 0                 | 0                 | 1                 | 0                 | 0    | 0                 | 0   |
| Papua New Guinea | 14847            | 5618             | 375              | 1900             | 1593             | 732              | 108              | 407              | 453              | 51                | 9229              | 1937             | 176              | 109              | 364               | 1097             | 276              | 1297              | 1113              | 563               | 1921              | 208  | 167               | 167 |
| 2000             | 15229            | 5627             | 376              | 1867             | 1609             | 744              | 108              | 411              | 463              | 50                | 9602              | 2018             | 183              | 115              | 382               | 1149             | 289              | 1310              | 1340              | 589               | 1819              | 234  | 174               | 174 |
| 2001             | 15713            | 5628             | 376              | 1840             | 1617             | 756              | 106              | 413              | 469              | 50                | 10085             | 2164             | 196              | 124              | 412               | 1239             | 313              | 1360              | 1753              | 634               | 1452              | 254  | 184               | 184 |
| 2002             | 14954            | 5616             | 376              | 1818             | 1617             | 762              | 104              | 413              | 475              | 49                | 9338              | 2097             | 190              | 120              | 401               | 1213             | 304              | 1277              | 1022              | 618               | 1655              | 269  | 172               | 172 |
| 2003             | 14392            | 5594             | 374              | 1803             | 1611             | 764              | 101              | 413              | 480              | 48                | 8798              | 1918             | 175              | 110              | 367               | 1111             | 280              | 1130              | 489               | 567               | 2210              | 279  | 161               | 161 |
| 2004             | 14185            | 5578             | 372              | 1781             | 1610             | 768              | 97               | 416              | 486              | 47                | 8607              | 2154             | 196              | 125              | 411               | 1251             | 317              | 1228              | 296               | 640               | 1527              | 281  | 181               | 181 |
| 2005             | 13908            | 5598             | 373              | 1767             | 1620             | 778              | 94               | 422              | 498              | 47                | 8310              | 2110             | 192              | 122              | 400               | 1230             | 312              | 1163              | 56                | 632               | 1636              | 279  | 177               | 177 |
| 2006             | 13937            | 5621             | 374              | 1760             | 1628             | 787              | 90               | 427              | 510              | 46                | 8316              | 2152             | 197              | 125              | 404               | 1251             | 319              | 1146              | 93                | 649               | 1518              | 273  | 188               | 188 |
| 2007             | 13883            | 5649             | 373              | 1765             | 1628             | 798              | 86               | 430              | 524              | 44                | 8234              | 2174             | 199              | 126              | 404               | 1256             | 324              | 1116              | 120               | 662               | 1396              | 256  | 201               | 201 |
| 2008             | 13823            | 5663             | 372              | 1779             | 1615             | 811              | 82               | 426              | 534              | 43                | 8160              | 1705             | 189              | 119              | 271               | 1211             | 308              | 1018              | 178               | 633               | 2123              | 230  | 174               | 174 |
| 2009             | 13529            | 5606             | 364              | 1764             | 1583             | 818              | 76               | 421              | 538              | 41                | 7923              | 1909             | 209              | 131              | 306               | 1325             | 340              | 1079              | 77                | 702               | 1418              | 227  | 202               | 202 |
| 2010             | 13326            | 5514             | 356              | 1734             | 1542             | 821              | 71               | 413              | 539              | 39                | 7812              | 1951             | 217              | 136              | 304               | 1380             | 354              | 1080              | 126               | 737               | 1100              | 215  | 211               | 211 |
| 2011             | 13024            | 5418             | 348              | 1700             | 1503             | 821              | 65               | 404              | 540              | 37                | 7606              | 1726             | 194              | 121              | 265               | 1231             | 317              | 927               | 141               | 663               | 1635              | 196  | 190               | 190 |
| 2012             | 12616            | 5290             | 337              | 1668             | 1454             | 807              | 60               | 392              | 537              | 35                | 7326              | 1666             | 190              | 119              | 250               | 1216             | 312              | 878               | 42                | 656               | 1643              | 169  | 184               | 184 |
| 2013             | 12285            | 5189             | 328              | 1645             | 1415             | 791              | 57               | 382              | 538              | 33                | 7096              | 1683             | 189              | 118              | 256               | 1209             | 311              | 838               | 67                | 658               | 1449              | 137  | 182               | 182 |
| 2014             | 11963            | 5127             | 322              | 1637             | 1388             | 775              | 55               | 374              | 544              | 32                | 6836              | 1620             | 182              | 114              | 246               | 1169             | 300              | 778               | 64                | 640               | 1415              | 132  | 175               | 175 |
| 2000             | 111              | 59               | 3                | 26               | 7                | 6                | 0                | 3                | 14               | 0                 | 52                | 11               | 1                | 1                | 2                 | 13               | 11               | 5                 | 0                 | 7                 | 0                 | 0    | 1                 | 1   |
| 2001             | 107              | 58               | 3                | 25               | 7                | 6                | 0                | 3                | 14               | 0                 | 49                | 10               | 1                | 1                | 2                 | 12               | 10               | 5                 | 0                 | 7                 | 0                 | 0    | 1                 | 1   |
| 2002             | 104              | 57               | 3                | 25               | 7                | 6                | 0                | 3                | 13               | 0                 | 47                | 9                | 1                | 1                | 1                 | 12               | 10               | 5                 | 0                 | 7                 | 0                 | 0    | 1                 | 1   |
| 2003             | 103              | 56               | 3                | 24               | 7                | 6                | 0                | 3                | 13               | 0                 | 47                | 9                | 1                | 1                | 1                 | 12               | 10               | 5                 | 0                 | 6                 | 0                 | 0    | 1                 | 1   |
| 2004             | 103              | 56               | 3                | 24               | 7                | 6                | 0                | 3                | 13               | 0                 | 47                | 8                | 1                | 1                | 1                 | 13               | 9                | 7                 | 0                 | 6                 | 0                 | 0    | 1                 | 1   |
| 2005             | 103              | 56               | 3                | 24               | 7                | 6                | 0                | 3                | 13               | 0                 | 47                | 8                | 1                | 1                | 1                 | 13               | 9                | 8                 | 0                 | 6                 | 0                 | 0    | 1                 | 1   |
| 2006             | 103              | 57               | 3                | 24               | 7                | 6                | 0                | 4                | 14               | 0                 | 46                | 7                | 1                | 1                | 1                 | 13               | 8                | 8                 | 0                 | 6                 | 0                 | 0    | 1                 | 1   |
| 2007             | 103              | 57               | 3                | 24               | 7                | 6                | 0                | 4                | 14               | 0                 | 46                | 7                | 1                | 1                | 1                 | 13               | 9                | 8                 | 0                 | 6                 | 0                 | 0    | 1                 | 1   |
| 2008             | 104              | 57               | 3                | 24               | 7                | 6                | 0                | 4                | 14               | 0                 | 47                | 7                | 1                | 1                | 1                 | 15               | 9                | 7                 | 0                 | 5                 | 0                 | 0    | 1                 | 1   |
| 2009             | 133              | 57               | 3                | 24               | 7                | 6                | 0                | 4                | 14               | 0                 | 76                | 7                | 1                | 1                | 1                 | 15               | 10               | 6                 | 0                 | 34                | 0                 | 0    | 1                 | 1   |
| 2010             | 103              | 57               | 3                | 24               | 7                | 6                | 0                | 4                | 14               | 0                 | 46                | 7                | 2                | 1                | 1                 | 14               | 10               | 5                 | 0                 | 6                 | 0                 | 0    | 1                 | 1   |
| 2011             | 100              | 55               | 3                | 23               | 7                | 6                | 0                | 4                | 13               | 0                 | 45                | 7                | 2                | 1                | 1                 | 13               | 10               | 4                 | 0                 | 6                 | 0                 | 0    | 1                 | 1   |
| 2012             | 96               | 52               | 3                | 21               | 6                | 6                | 0                | 4                | 12               | 0                 | 44                | 7                | 2                | 1                | 1                 | 12               | 10               | 3                 | 0                 | 6                 | 0                 | 0    | 1                 | 1   |
| 2013             | 90               | 49               | 2                | 20               | 6                | 5                | 0                | 4                | 12               | 0                 | 41                | 6                | 2                | 1                | 1                 | 12               | 9                | 3                 | 0                 | 6                 | 0                 | 0    | 1                 | 1   |
| 2014             | 85               | 45               | 2                | 19               | 5                | 5                | 0                | 3                | 11               | 0                 | 40                | 6                | 2                | 1                | 1                 | 11               | 9                | 3                 | 0                 | 6                 | 0                 | 0    | 1                 | 1   |
| 2015             | 80               | 43               | 2                | 18               | 5                | 5                | 0                | 3                | 10               | 0                 | 37                | 6                | 2                | 1                | 1                 | 10               | 9                | 2                 | 0                 | 5                 | 0                 | 0    | 1                 | 1   |
| Solomon Islands  | 455              | 199              | 12               | 58               | 52               | 30               | 1                | 15               | 32               | 1                 | 256               | 63               | 6                | 4                | 13                | 33               | 11               | 34                | 0                 | 24                | 55                | 0    | 12                | 12  |
| 2000             | 463              | 202              | 12               | 59               | 52               | 30               | 1                | 15               | 32               | 1                 | 261               | 63               | 6                | 4                | 13                | 33               | 11               | 33                | 0                 | 24                | 62                | 0    | 12                | 12  |
| 2001             | 474              | 206              | 12               | 60               | 54               | 30               | 1                | 16               | 33               | 1                 | 268               | 66               | 6                | 4                | 14                | 34               | 11               | 33                | 0                 | 25                | 60                | 0    | 13                | 13  |
| 2002             | 488              | 214              | 12               | 62               | 56               | 31               | 1                | 16               | 35               | 1                 | 274               | 71               | 7                | 5                | 15                | 38               | 12               | 35                | 0                 | 27                | 50                | 0    | 13                | 13  |
| 2003             | 504              | 220              | 13               | 64               | 57               | 32               | 1                | 17               | 35               | 1                 | 284               | 64               | 6                | 4                | 14                | 35               | 11               | 31                | 0                 | 25                | 84                | 0    | 12                | 12  |
| 2004             | 518              | 226              | 13               | 66               | 58               | 33               | 1                | 17               | 36               | 1                 | 292               | 73               | 7                | 5                | 15                | 39               | 13               | 34                | 0                 | 28                | 64                | 0    | 14                | 14  |
| 2005             | 533              | 233              | 14               | 68               | 60               | 34               | 1                | 18               | 37               | 1                 | 300               | 76               | 7                | 5                | 16                | 42               | 14               | 35                | 0                 | 29                | 63                | 0    | 13                | 13  |
| 2006             | 542              | 237              | 14               | 69               | 61               | 35               | 1                | 18               | 38               | 1                 | 305               | 89               | 9                | 6                | 18                | 48               | 16               | 40                | 0                 | 34                | 28                | 0    | 17                | 17  |
| 2007             | 547              | 238              | 14               | 69               | 61               | 36               | 1                | 18               | 38               | 1                 | 309               | 82               | 10               | 7                | 13                | 58               | 19               | 46                | 0                 | 41                | 14                | 0    | 19                | 19  |
| 2008             | 545              | 235              | 13               | 68               | 60               | 36               | 1                | 18               | 38               | 1                 | 310               | 83               | 10               | 7                | 13                | 60               | 20               | 45                | 0                 | 42                | 10                | 0    | 20                | 20  |
| 2009             | 541              | 234              | 13               | 68               | 59               | 36               | 1                | 18               | 38               | 1                 | 307               | 82               | 10               | 7                | 13                | 59               | 20               | 43                | 0                 | 41                | 12                | 0    | 20                | 20  |
| 2010             | 531              | 229              | 13               | 67               | 57               | 35               | 1                | 18               | 38               | 1                 | 302               | 80               | 10               | 7                | 12                | 63               | 20               | 42                | 0                 | 42                | 7                 | 0    | 18                | 18  |
| 2011             | 519              | 223              | 12               | 65               | 56               | 34               | 1                | 17               | 37               | 1                 | 296               | 79               | 10               | 7                | 12                | 62               | 20               | 41                | 0                 | 42                | 6                 | 0    | 18                | 18  |
| 2012             | 504              | 217              | 12               | 64               | 54               | 32               | 1                | 17               | 37               | 1                 | 287               | 78               | 10               | 7                | 12                | 60               | 19               | 38                | 0                 | 41                | 6                 | 0    | 17                | 17  |
| 2013             | 485              | 209              | 12               | 62               | 52               | 31               | 1                | 16               | 36               | 1                 | 276               | 76               | 10               | 7                | 12                | 57               | 19               | 35                | 0                 | 39                | 5                 | 0    | 17                | 17  |
| 2014             | 470              | 203              | 11               | 60               | 50               | 30               | 1                | 15               | 35               | 1                 | 267               | 74               | 9                | 6                | 11                | 56               | 18               | 33                | 0                 | 38                | 4                 | 0    | 16                | 16  |
| 2000             | 45               | 19               | 1                | 8                | 2                | 2                | 0                | 1                | 5                | 0                 | 26                | 5                | 1                | 0                | 1                 | 7                | 6                | 2                 | 0                 | 4                 | 0                 | 0    | 0                 | 0   |
| 2001             | 45               | 19               | 1                | 8                | 2                | 2                | 0                | 1                | 5                | 0                 | 26                | 5                | 1                | 0                | 1                 | 7                | 6                | 2                 | 0                 | 4                 | 0                 | 0    | 0                 | 0   |
| 2002             | 45               | 19               | 1                | 8                | 2                | 2                | 0                | 1                | 5                | 0                 | 26                | 5                | 1                | 0                | 1                 | 7                | 6                | 2                 | 0                 | 4                 | 0                 | 0    | 0                 | 0   |
| 2003             | 46               | 20               | 1                | 8                | 2                | 2                | 0                | 1                | 5                | 0                 | 26                | 4                | 1                | 0                | 1                 | 7                | 6                | 2                 | 0                 | 4                 | 0                 | 0    | 0                 | 0   |
| 2004             | 47               | 20               | 1                | 8                | 2                | 2                | 0                | 1                | 5                | 0                 | 27                | 5                | 1                | 0                | 1                 | 8                | 6                | 2                 | 0                 | 4                 | 0                 | 0    | 0                 | 0   |
| 2005             | 48               | 21               | 1                | 9                | 2                | 2                | 0                | 1                | 5                | 0                 | 27                | 4                | 1                | 1                | 1                 | 8                | 7                | 2                 | 0                 | 4                 | 0                 | 0    | 0                 | 0   |
| 2006             | 49               | 21               | 1                | 9                | 2                | 2                | 0                | 1                | 5                | 0                 | 28                | 4                | 1                | 1                | 1                 | 8                | 7                | 2                 | 0                 | 4                 | 0                 | 0    | 0                 | 0   |
| 2007             | 49               | 21               | 1                | 9                | 2                | 2                | 0                | 1                | 5                | 0                 | 28                | 4                | 1                | 1                | 1                 | 8                | 7                | 2                 | 0                 | 4                 | 0                 | 0    | 0                 | 0   |
| 2008             | 49               | 21               | 1                | 9                | 2                | 2                | 0                | 1                | 5                | 0                 | 28                | 4                | 1                | 1                | 1                 | 8                | 7                | 2                 | 0                 | 4                 | 0                 | 0    | 0                 | 0   |
| 2009             | 49               | 20               | 1                | 8                | 2                | 2                | 0                | 1                | 5                | 0                 | 29                | 4                | 1                | 1                | 1                 | 8                | 7                | 2                 | 0                 | 4                 | 0                 | 0    | 0                 | 0   |
| 2010             | 49               | 20               | 1                | 8                | 2                | 2                | 0                | 1                | 5                | 0                 | 29                | 4                | 1                | 1                | 1                 | 8                | 7                | 2                 | 0                 | 5                 | 0                 | 0    | 0                 | 0   |
| 2011             | 49               | 20               | 1                | 8                | 2                | 2                | 0                | 1                | 5                | 0                 | 29                | 4                | 1                | 1                | 1                 | 8                | 7                | 2                 | 0                 | 5                 | 0                 | 0    | 0                 | 0   |
| 2012             | 47               | 20               | 1                | 8                | 2                | 2                | 0                | 1                | 5                | 0                 | 27                | 4                |                  |                  |                   |                  |                  |                   |                   |                   |                   |      |                   |     |



Webappendix 6. Estimated numbers of deaths by cause in neonates, children aged 1-59 months at the global, regional and country levels in 2000-2015

| Year              | 0-28 days        |                  |                  |                  |                  |                  |                  |                  |                  |                   | 1-59 months       |                  |                  |                  |                   |                  |                  |                   |                   |                   |                   |      |                   |     |
|-------------------|------------------|------------------|------------------|------------------|------------------|------------------|------------------|------------------|------------------|-------------------|-------------------|------------------|------------------|------------------|-------------------|------------------|------------------|-------------------|-------------------|-------------------|-------------------|------|-------------------|-----|
|                   | USD <sup>1</sup> | NEO <sup>2</sup> | PNE <sup>3</sup> | PRE <sup>4</sup> | INT <sup>5</sup> | SEP <sup>6</sup> | TET <sup>7</sup> | OTH <sup>8</sup> | CON <sup>9</sup> | DIA <sup>10</sup> | POS <sup>11</sup> | PNE <sup>3</sup> | PRE <sup>4</sup> | INT <sup>5</sup> | MEN <sup>12</sup> | OTH <sup>8</sup> | CON <sup>9</sup> | DIA <sup>10</sup> | MEA <sup>13</sup> | INJ <sup>14</sup> | MAL <sup>15</sup> | AIDS | PER <sup>16</sup> |     |
| 2005              | 462502           | 209682           | 13624            | 71418            | 50743            | 27195            | 1926             | 15732            | 27830            | 1213              | 252820            | 73086            | 5561             | 4351             | 11993             | 48141            | 14191            | 41451             | 17823             | 25195             | 3772              | 2405 | 4852              |     |
| 2006              | 447870           | 203851           | 13129            | 69666            | 48808            | 26316            | 1762             | 15283            | 27760            | 1128              | 244019            | 70129            | 5422             | 4188             | 10272             | 46625            | 13909            | 38525             | 19549             | 24578             | 3449              | 2513 | 4859              |     |
| 2007              | 424566           | 197715           | 12604            | 67797            | 46871            | 25290            | 1626             | 14823            | 27656            | 1048              | 226851            | 67082            | 5270             | 4026             | 9672              | 44888            | 13464            | 35601             | 13976             | 23883             | 1522              | 2593 | 4873              |     |
| 2008              | 425442           | 191855           | 12097            | 65956            | 44986            | 24434            | 1496             | 14349            | 27567            | 971               | 233587            | 64582            | 5147             | 3901             | 9282              | 43527            | 12986            | 33096             | 6110              | 44403             | 3253              | 2565 | 4736              |     |
| 2009              | 384855           | 185515           | 11544            | 63692            | 43018            | 23832            | 1336             | 13880            | 27324            | 891               | 199340            | 59609            | 4863             | 3611             | 8381              | 40309            | 12329            | 29399             | 8509              | 21901             | 3159              | 2509 | 4763              |     |
| 2010              | 370554           | 180386           | 11054            | 61901            | 41256            | 23542            | 1183             | 13452            | 27179            | 820               | 190168            | 55963            | 4890             | 3534             | 7739              | 39498            | 12050            | 27200             | 7488              | 21401             | 3057              | 2485 | 4863              |     |
| 2011              | 362784           | 176771           | 10689            | 60734            | 39862            | 23377            | 1060             | 13127            | 27160            | 762               | 186013            | 53748            | 4909             | 3478             | 7318              | 38504            | 11916            | 25364             | 9295              | 21042             | 3052              | 2522 | 4865              |     |
| 2012              | 352704           | 174571           | 10417            | 60194            | 38891            | 23139            | 982              | 12879            | 27347            | 722               | 178133            | 51985            | 4874             | 3421             | 6973              | 37668            | 11776            | 23706             | 6205              | 20725             | 3492              | 2510 | 4799              |     |
| 2013              | 347410           | 172209           | 10148            | 59707            | 37938            | 22672            | 926              | 12641            | 27492            | 685               | 175201            | 48850            | 4983             | 3514             | 5965              | 39201            | 11929            | 23302             | 5982              | 21569             | 2699              | 2468 | 4740              |     |
| 2014              | 340654           | 169024           | 9844             | 58861            | 36906            | 22056            | 874              | 12360            | 27471            | 652               | 171630            | 47015            | 4979             | 3502             | 5643              | 38803            | 11861            | 22462             | 6088              | 21401             | 2822              | 2423 | 4631              |     |
| 2015              | 330950           | 164608           | 9486             | 57572            | 35631            | 21288            | 823              | 12001            | 27187            | 620               | 166342            | 45609            | 4916             | 3432             | 5444              | 37892            | 11656            | 21084             | 5741              | 20958             | 2762              | 2350 | 4497              |     |
| Brunei Darussalam | 2000             | 64               | 33               | 0                | 13               | 5                | 1                | 1                | 4                | 9                 | 0                 | 31               | 3                | 1                | 0                 | 1                | 9                | 8                 | 0                 | 0                 | 6                 | 0    | 0                 | 1   |
| 2001              | 62               | 32               | 0                | 13               | 4                | 1                | 1                | 4                | 9                | 0                 | 30                | 3                | 1                | 0                | 1                 | 9                | 8                | 0                 | 0                 | 6                 | 0                 | 0    | 1                 |     |
| 2002              | 60               | 32               | 0                | 13               | 4                | 1                | 1                | 4                | 9                | 0                 | 28                | 2                | 1                | 1                | 1                 | 8                | 8                | 0                 | 0                 | 5                 | 0                 | 0    | 1                 |     |
| 2003              | 59               | 32               | 0                | 13               | 4                | 1                | 1                | 4                | 9                | 0                 | 27                | 2                | 1                | 0                | 1                 | 8                | 7                | 0                 | 0                 | 5                 | 0                 | 0    | 1                 |     |
| 2004              | 58               | 31               | 0                | 12               | 4                | 0                | 1                | 4                | 9                | 0                 | 27                | 2                | 1                | 0                | 1                 | 8                | 7                | 0                 | 0                 | 5                 | 0                 | 0    | 1                 |     |
| 2005              | 57               | 31               | 0                | 12               | 4                | 0                | 1                | 4                | 9                | 0                 | 26                | 2                | 1                | 0                | 1                 | 8                | 7                | 0                 | 0                 | 5                 | 0                 | 0    | 1                 |     |
| 2006              | 56               | 30               | 0                | 12               | 4                | 0                | 1                | 4                | 9                | 0                 | 26                | 2                | 1                | 0                | 1                 | 8                | 7                | 0                 | 0                 | 5                 | 0                 | 0    | 1                 |     |
| 2007              | 54               | 28               | 0                | 11               | 4                | 0                | 1                | 3                | 8                | 0                 | 26                | 2                | 1                | 0                | 1                 | 8                | 7                | 0                 | 0                 | 5                 | 0                 | 0    | 1                 |     |
| 2008              | 53               | 27               | 0                | 11               | 4                | 0                | 1                | 3                | 8                | 0                 | 26                | 2                | 1                | 0                | 1                 | 8                | 7                | 0                 | 0                 | 5                 | 0                 | 0    | 1                 |     |
| 2009              | 53               | 27               | 0                | 11               | 4                | 0                | 1                | 3                | 8                | 0                 | 26                | 2                | 1                | 0                | 1                 | 8                | 7                | 0                 | 0                 | 5                 | 0                 | 0    | 1                 |     |
| 2010              | 55               | 27               | 0                | 11               | 4                | 1                | 0                | 3                | 8                | 0                 | 28                | 2                | 1                | 1                | 1                 | 8                | 7                | 0                 | 0                 | 6                 | 0                 | 0    | 1                 |     |
| 2011              | 58               | 28               | 0                | 11               | 4                | 1                | 0                | 3                | 8                | 0                 | 30                | 2                | 1                | 1                | 1                 | 9                | 8                | 0                 | 0                 | 6                 | 0                 | 0    | 1                 |     |
| 2012              | 63               | 29               | 0                | 12               | 4                | 1                | 0                | 3                | 8                | 0                 | 34                | 3                | 2                | 1                | 1                 | 10               | 9                | 0                 | 0                 | 7                 | 0                 | 0    | 1                 |     |
| 2013              | 69               | 31               | 0                | 13               | 4                | 1                | 0                | 4                | 9                | 0                 | 38                | 3                | 2                | 1                | 1                 | 12               | 10               | 1                 | 0                 | 8                 | 0                 | 0    | 1                 |     |
| 2014              | 74               | 32               | 0                | 13               | 4                | 1                | 0                | 4                | 9                | 0                 | 42                | 3                | 2                | 1                | 1                 | 13               | 11               | 1                 | 0                 | 9                 | 0                 | 0    | 1                 |     |
| 2015              | 77               | 33               | 0                | 14               | 4                | 1                | 0                | 4                | 9                | 0                 | 44                | 4                | 2                | 1                | 1                 | 14               | 11               | 1                 | 0                 | 10                | 0                 | 0    | 1                 |     |
| Cambodia          | 2000             | 35775            | 11212            | 789              | 3616             | 3321             | 1438             | 393              | 798              | 685               | 173               | 24563            | 6634             | 519              | 292               | 1373             | 3833             | 577               | 5071              | 1357              | 1679              | 2257 | 648               | 323 |
| 2001              | 31809            | 10581            | 737              | 3412             | 3125             | 1385             | 306              | 768              | 702              | 145               | 21228             | 6218             | 492              | 274              | 1265              | 3593             | 552              | 4463              | 900               | 1642              | 823               | 659  | 347               |     |
| 2002              | 27975            | 10027            | 687              | 3226             | 2922             | 1372             | 228              | 742              | 733              | 119               | 17948             | 5473             | 437              | 241              | 1094              | 3135             | 494              | 3671              | 294               | 1517              | 580               | 637  | 376               |     |
| 2003              | 25189            | 9673             | 649              | 3081             | 2755             | 1420             | 168              | 726              | 775              | 99                | 15516             | 4706             | 381              | 207              | 925               | 2673             | 434              | 2954              | 118               | 1367              | 773               | 602  | 378               |     |
| 2004              | 23273            | 9376             | 613              | 2943             | 2601             | 1490             | 123              | 713              | 810              | 83                | 13897             | 4604             | 353              | 191              | 835               | 2460             | 406              | 2556              | 69                | 1305              | 462               | 561  | 375               |     |
| 2005              | 21899            | 9148             | 584              | 2818             | 2498             | 1526             | 96               | 708              | 848              | 71                | 12751             | 4060             | 334              | 180              | 768               | 2291             | 389              | 2273              | 95                | 1266              | 223               | 471  | 401               |     |
| 2006              | 20827            | 8970             | 561              | 2711             | 2424             | 1539             | 78               | 705              | 891              | 61                | 11857             | 3794             | 315              | 169              | 704               | 2139             | 370              | 2017              | 105               | 1217              | 224               | 398  | 405               |     |
| 2007              | 19817            | 8806             | 541              | 2616             | 2355             | 1545             | 65               | 698              | 935              | 52                | 11011             | 3580             | 299              | 160              | 654               | 2029             | 354              | 1810              | 125               | 1180              | 92                | 330  | 399               |     |
| 2008              | 19111            | 8592             | 517              | 2519             | 2262             | 1545             | 54               | 682              | 968              | 45                | 10519             | 3324             | 280              | 149              | 601               | 1907             | 333              | 1599              | 479               | 1125              | 88                | 263  | 371               |     |
| 2009              | 18082            | 8298             | 488              | 2411             | 2145             | 1518             | 45               | 661              | 991              | 39                | 9784              | 3020             | 255              | 135              | 542               | 1734             | 305              | 1382              | 655               | 1050              | 141               | 207  | 358               |     |
| 2010              | 16312            | 7914             | 456              | 2295             | 2004             | 1455             | 38               | 628              | 1003             | 34                | 8398              | 2294             | 258              | 137              | 319               | 1771             | 310              | 1328              | 263               | 1092              | 85                | 175  | 366               |     |
| 2011              | 14809            | 7371             | 416              | 2139             | 1831             | 1353             | 31               | 583              | 988              | 30                | 7438              | 2049             | 233              | 123              | 280               | 1577             | 280              | 1136              | 170               | 1008              | 95                | 125  | 363               |     |
| 2012              | 13245            | 6813             | 377              | 1981             | 1663             | 1239             | 26               | 536              | 964              | 26                | 6432              | 1668             | 207              | 109              | 242               | 1365             | 249              | 958               | 43                | 916               | 59                | 107  | 368               |     |
| 2013              | 11980            | 6203             | 339              | 1805             | 1496             | 1110             | 22               | 486              | 922              | 23                | 5777              | 1652             | 188              | 99               | 222               | 1250             | 227              | 828               | 37                | 847               | 29                | 65   | 332               |     |
| 2014              | 11022            | 5661             | 306              | 1651             | 1350             | 999              | 18               | 442              | 876              | 20                | 5361              | 1504             | 175              | 92               | 196               | 1172             | 212              | 734               | 78                | 799               | 34                | 59   | 305               |     |
| 2015              | 10257            | 5282             | 282              | 1547             | 1245             | 920              | 16               | 410              | 845              | 18                | 4975              | 1398             | 163              | 86               | 181               | 1100             | 198              | 655               | 74                | 754               | 28                | 55   | 284               |     |
| Indonesia         | 2000             | 234920           | 97002            | 6213             | 29645            | 26695            | 14304            | 692              | 7812             | 11138             | 504               | 137918           | 38913            | 2654             | 2685              | 5455             | 24852            | 4607              | 24944             | 18543             | 13101             | 1173 | 63                | 927 |
| 2001              | 220654           | 93966            | 5947             | 28831            | 25633            | 13704            | 630              | 7549             | 11212            | 461               | 126688            | 36845            | 2514             | 2585             | 5147              | 23789            | 4461             | 22698             | 13973             | 12601             | 1045              | 98   | 933               |     |
| 2002              | 211345           | 91461            | 5721             | 28236            | 24690            | 13231            | 580              | 7295             | 11283            | 425               | 119884            | 35214            | 2401             | 2509             | 4865              | 22972            | 4350             | 20873             | 12233             | 12215             | 1134              | 151  | 968               |     |
| 2003              | 203614           | 89646            | 5543             | 27856            | 23908            | 12892            | 539              | 7079             | 11430            | 399               | 113968            | 33467            | 2285             | 2424             | 4560              | 22065            | 4235             | 19083             | 11723             | 11778             | 1135              | 229  | 984               |     |
| 2004              | 225321           | 88245            | 5393             | 27587            | 23228            | 12652            | 502              | 6897             | 11610            | 377               | 137076            | 32073            | 2187             | 2357             | 4314              | 21352            | 4135             | 17598             | 12526             | 38108             | 1077              | 338  | 1010              |     |
| 2005              | 192897           | 86012            | 5199             | 27048            | 22361            | 12258            | 464              | 6677             | 11651            | 355               | 106885            | 29833            | 2033             | 2225             | 3961              | 20021            | 3921             | 15763             | 14787             | 10790             | 2058              | 473  | 1020              |     |
| 2006              | 187376           | 83548            | 5000             | 26534            | 21466            | 11699            | 433              | 6431             | 11647            | 338               | 103828            | 28437            | 1951             | 2132             | 3726              | 19222            | 3799             | 14475             | 16239             | 10417             | 1745              | 634  | 1051              |     |
| 2007              | 173563           | 81232            | 4812             | 26068            | 20644            | 11090            | 405              | 6240             | 11649            | 324               | 92331             | 27320            | 1886             | 2057             | 3531              | 18566            | 3700             | 13401             | 9523              | 10131             | 283               | 816  | 1117              |     |
| 2008              | 161609           | 79020            | 4629             | 25678            | 19792            | 10569            | 376              | 6035             | 11627            | 314               | 82589             | 25201            | 1750             | 1906             | 3212              | 17217            | 3460             | 11910             | 4531              | 9463              | 1792              | 1019 | 1128              |     |
| 2009              | 157823           | 77428            | 4472             | 25401            | 19023            | 10418            | 341              | 5878             | 11590            | 305               | 80395             | 24039            | 1677             | 1824             | 3023              | 16515            | 3336             | 10956             | 5733              | 9130              | 1809              | 1201 | 1152              |     |
| 2010              | 153388           | 75790            | 4306             | 25184            | 18141            | 10427            | 307              | 5624             | 11505            | 295               | 77598             | 23199            | 1624             | 1764             | 2882              | 16066            | 3242             | 10189             | 5392              | 8920              | 1807              | 1362 | 1150              |     |
| 2011              | 152723           | 75354            | 4215             | 25353            | 17582            | 10614            | 281              | 5452             | 11568            | 289               | 77369             | 22751            | 1595             | 1736             | 2798              | 15915            | 3202             | 9638              | 6349              | 8845              | 1923              | 1495 | 1121              |     |
| 2012              | 150629           | 75957            | 4198             | 25862            | 17372            | 10768            | 268              | 5370             | 11833            | 286               | 74672             | 22451            | 1580             | 1719             | 2738              | 15886            | 3191             | 9178              | 4003              | 8821              | 2458              | 1591 | 1057              |     |
| 2013              | 151401           | 76305            | 4172             | 26248            | 17200            | 10740            | 255              | 5319             | 12089            | 281               | 75096             | 22724            | 1624             | 1767             | 2735              | 16422            | 3299             | 9080              | 3755              | 9115              | 1835              | 1668 | 1071              |     |
| 2014              | 151192           | 75977            | 4115             | 26342            | 16930            | 10557            | 243              | 5244             | 12273            | 273               | 75215             | 21728            | 1638             | 1783             | 2526              | 16664            | 3349             | 8817              | 4567              | 9248              | 2054              | 1787 | 1053              |     |
| 201               |                  |                  |                  |                  |                  |                  |                  |                  |                  |                   |                   |                  |                  |                  |                   |                  |                  |                   |                   |                   |                   |      |                   |     |

Webappendix 6. Estimated numbers of deaths by cause in neonates, children aged 1-59 months at the global, regional and country levels in 2000-2015

|             | Year  | 0-28 days        |                  |                  |                  |                  |                  |                  |                  |                  |                   | 1-59 months       |                  |                  |                  |                   |                  |                  |                   |                   |                   |                   |      |                   |
|-------------|-------|------------------|------------------|------------------|------------------|------------------|------------------|------------------|------------------|------------------|-------------------|-------------------|------------------|------------------|------------------|-------------------|------------------|------------------|-------------------|-------------------|-------------------|-------------------|------|-------------------|
|             |       | USD <sup>1</sup> | NEO <sup>2</sup> | PNE <sup>3</sup> | PRE <sup>4</sup> | INT <sup>5</sup> | SEP <sup>6</sup> | TET <sup>7</sup> | OTH <sup>8</sup> | CON <sup>9</sup> | DIA <sup>10</sup> | POS <sup>11</sup> | PNE <sup>3</sup> | PRE <sup>4</sup> | INT <sup>5</sup> | MEN <sup>12</sup> | OTH <sup>8</sup> | CON <sup>9</sup> | DIA <sup>10</sup> | MEA <sup>13</sup> | INJ <sup>14</sup> | MAL <sup>15</sup> | AIDS | PER <sup>16</sup> |
| Philippines | 2000  | 90090            | 38356            | 2397             | 13454            | 9529             | 4591             | 284              | 2694             | 5061             | 347               | 51734             | 16838            | 1626             | 655              | 2399              | 8898             | 1925             | 10199             | 330               | 6164              | 53                | 13   | 2635              |
|             | 2001  | 90089            | 38761            | 2403             | 13732            | 9537             | 4583             | 280              | 2714             | 5158             | 353               | 51328             | 16661            | 1615             | 655              | 2355              | 8809             | 1935             | 9757              | 676               | 6134              | 50                | 15   | 2668              |
|             | 2002  | 89689            | 39119            | 2405             | 13986            | 9543             | 4560             | 277              | 2734             | 5258             | 358               | 50570             | 16446            | 1597             | 658              | 2306              | 8645             | 1942             | 9311              | 761               | 6090              | 53                | 17   | 2747              |
|             | 2003  | 89178            | 39107            | 2385             | 14106            | 9441             | 4532             | 269              | 2718             | 5300             | 357               | 50071             | 16251            | 1584             | 658              | 2260              | 8579             | 1951             | 8895              | 1014              | 6053              | 69                | 19   | 2739              |
|             | 2004  | 87545            | 38875            | 2351             | 14126            | 9273             | 4527             | 258              | 2682             | 5306             | 352               | 48670             | 15973            | 1559             | 656              | 2201              | 8493             | 1945             | 8452              | 618               | 5985              | 73                | 21   | 2695              |
|             | 2005  | 85243            | 38394            | 2296             | 14059            | 9043             | 4498             | 245              | 2631             | 5276             | 345               | 46849             | 15210            | 1486             | 633              | 3173              | 8042             | 1874             | 7779              | 157               | 5733              | 68                | 24   | 2672              |
|             | 2006  | 82659            | 37369            | 2212             | 13763            | 8712             | 4391             | 230              | 2548             | 5182             | 331               | 45290             | 15117            | 1488             | 627              | 2038              | 8056             | 1884             | 7473              | 149               | 5732              | 51                | 26   | 2648              |
|             | 2007  | 79903            | 36134            | 2120             | 13340            | 8375             | 4243             | 214              | 2460             | 5070             | 313               | 43769             | 14655            | 1451             | 606              | 1951              | 7849             | 1843             | 7007              | 157               | 5587              | 51                | 28   | 2584              |
|             | 2008  | 76696            | 34625            | 2020             | 12661            | 8032             | 4098             | 194              | 2374             | 4957             | 288               | 42071             | 14158            | 1411             | 584              | 1862              | 7666             | 1797             | 6543              | 88                | 5431              | 34                | 30   | 2469              |
|             | 2009  | 73883            | 33269            | 1928             | 11879            | 7789             | 4009             | 172              | 2340             | 4894             | 257               | 40614             | 13696            | 1372             | 562              | 1780              | 7366             | 1749             | 6117              | 144               | 5287              | 27                | 32   | 2484              |
|             | 2010  | 72083            | 32392            | 1861             | 11249            | 7659             | 3994             | 153              | 2354             | 4892             | 229               | 39691             | 13310            | 1344             | 545              | 1709              | 7072             | 1716             | 5765              | 413               | 5181              | 26                | 32   | 2579              |
|             | 2011  | 70833            | 31711            | 1806             | 10766            | 7537             | 4009             | 138              | 2357             | 4892             | 206               | 39122             | 12824            | 1350             | 542              | 1603              | 7083             | 1722             | 5578              | 544               | 5213              | 12                | 34   | 2617              |
|             | 2012  | 69255            | 31258            | 1765             | 10487            | 7411             | 4037             | 127              | 2337             | 4903             | 191               | 37997             | 12396            | 1342             | 541              | 1519              | 7046             | 1720             | 5298              | 253               | 5209              | 8                 | 38   | 2627              |
|             | 2013  | 68191            | 30684            | 1717             | 10237            | 7222             | 4044             | 117              | 2294             | 4873             | 179               | 37507             | 10732            | 1454             | 586              | 1067              | 7893             | 1871             | 5278              | 300               | 5667              | 8                 | 41   | 2611              |
|             | 2014  | 66959            | 30080            | 1669             | 10028            | 7025             | 3999             | 109              | 2243             | 4835             | 171               | 36879             | 10856            | 1404             | 566              | 1143              | 7595             | 1813             | 5192              | 211               | 5496              | 5                 | 30   | 2568              |
| 2015        | 65613 | 29601            | 1630             | 9887             | 6859             | 3940             | 103              | 2201             | 4816             | 165              | 36012             | 10623             | 1377             | 555              | 1115             | 7482              | 1785             | 4910             | 208               | 5415              | 4                 | 29                | 2508 |                   |
| Singapore   | 2000  | 180              | 68               | 1                | 26               | 5                | 4                | 0                | 1                | 30               | 0                 | 112               | 15               | 10               | 1                | 6                 | 39               | 29               | 0                 | 11                | 0                 | 0                 | 0    |                   |
|             | 2001  | 160              | 61               | 1                | 14               | 3                | 3                | 0                | 6                | 35               | 0                 | 99                | 18               | 4                | 0                | 2                 | 31               | 26               | 2                 | 0                 | 15                | 0                 | 0    |                   |
|             | 2002  | 148              | 58               | 1                | 33               | 1                | 1                | 0                | 5                | 17               | 0                 | 90                | 19               | 8                | 1                | 4                 | 27               | 20               | 2                 | 0                 | 9                 | 0                 | 0    |                   |
|             | 2003  | 144              | 56               | 3                | 26               | 2                | 1                | 0                | 7                | 18               | 0                 | 88                | 27               | 9                | 2                | 0                 | 24               | 19               | 0                 | 0                 | 8                 | 0                 | 0    |                   |
|             | 2004  | 141              | 59               | 2                | 10               | 7                | 3                | 0                | 2                | 35               | 0                 | 82                | 21               | 9                | 0                | 1                 | 22               | 14               | 1                 | 0                 | 12                | 0                 | 0    |                   |
|             | 2005  | 140              | 61               | 3                | 15               | 7                | 0                | 0                | 4                | 33               | 0                 | 79                | 23               | 9                | 2                | 2                 | 19               | 16               | 0                 | 0                 | 8                 | 0                 | 0    |                   |
|             | 2006  | 142              | 58               | 3                | 31               | 4                | 1                | 0                | 1                | 18               | 0                 | 84                | 22               | 0                | 0                | 0                 | 18               | 37               | 0                 | 0                 | 7                 | 0                 | 0    |                   |
|             | 2007  | 145              | 59               | 4                | 27               | 1                | 1                | 0                | 6                | 20               | 0                 | 86                | 27               | 4                | 0                | 2                 | 16               | 26               | 2                 | 0                 | 10                | 0                 | 0    |                   |
|             | 2008  | 142              | 60               | 4                | 26               | 1                | 4                | 0                | 4                | 21               | 0                 | 82                | 15               | 10               | 0                | 2                 | 23               | 25               | 0                 | 0                 | 8                 | 0                 | 0    |                   |
|             | 2009  | 143              | 61               | 4                | 23               | 5                | 3                | 0                | 6                | 19               | 0                 | 82                | 17               | 9                | 5                | 3                 | 19               | 17               | 2                 | 0                 | 11                | 0                 | 0    |                   |
|             | 2010  | 145              | 57               | 0                | 22               | 9                | 1                | 0                | 0                | 25               | 0                 | 88                | 11               | 11               | 0                | 0                 | 36               | 23               | 2                 | 0                 | 6                 | 0                 | 0    |                   |
|             | 2011  | 147              | 57               | 3                | 23               | 8                | 1                | 0                | 7                | 16               | 0                 | 90                | 13               | 9                | 2                | 2                 | 24               | 29               | 2                 | 0                 | 9                 | 0                 | 0    |                   |
|             | 2012  | 148              | 58               | 3                | 17               | 4                | 4                | 0                | 8                | 22               | 0                 | 90                | 23               | 4                | 0                | 0                 | 30               | 27               | 0                 | 0                 | 7                 | 0                 | 0    |                   |
|             | 2013  | 149              | 59               | 0                | 24               | 2                | 3                | 0                | 11               | 19               | 0                 | 90                | 16               | 2                | 2                | 0                 | 45               | 18               | 0                 | 0                 | 8                 | 0                 | 0    |                   |
|             | 2014  | 150              | 59               | 2                | 21               | 5                | 3                | 0                | 8                | 20               | 0                 | 91                | 18               | 5                | 1                | 1                 | 33               | 25               | 1                 | 0                 | 8                 | 0                 | 0    |                   |
| 2015        | 145   | 53               | 2                | 19               | 4                | 3                | 0                | 7                | 18               | 0                | 92                | 18                | 5                | 1                | 1                | 34                | 25               | 1                | 0                 | 8                 | 0                 | 0                 |      |                   |
| Thailand    | 2000  | 20439            | 11397            | 799              | 4567             | 1599             | 1148             | 79               | 851              | 2355             | 0                 | 9042              | 1853             | 187              | 62               | 225               | 2026             | 1816             | 990               | 50                | 823               | 211               | 718  | 82                |
|             | 2001  | 19257            | 10702            | 731              | 4256             | 1481             | 1067             | 76               | 832              | 2260             | 0                 | 8555              | 1698             | 185              | 63               | 209               | 1943             | 1752             | 898               | 92                | 804               | 136               | 694  | 81                |
|             | 2002  | 18216            | 10096            | 664              | 3989             | 1381             | 992              | 76               | 815              | 2180             | 0                 | 8120              | 1575             | 186              | 64               | 196               | 1896             | 1714             | 816               | 80                | 793               | 114               | 606  | 81                |
|             | 2003  | 17341            | 9617             | 607              | 3779             | 1300             | 938              | 68               | 803              | 2122             | 0                 | 7724              | 1470             | 187              | 65               | 184               | 1908             | 1685             | 737               | 57                | 785               | 62                | 503  | 79                |
|             | 2004  | 16439            | 9125             | 550              | 3577             | 1220             | 876              | 68               | 782              | 2054             | 0                 | 7314              | 1356             | 187              | 66               | 172               | 1826             | 1640             | 659               | 48                | 766               | 71                | 446  | 79                |
|             | 2005  | 15459            | 8591             | 493              | 3368             | 1134             | 805              | 68               | 747              | 1976             | 0                 | 6868              | 1232             | 184              | 66               | 157               | 1752             | 1575             | 584               | 43                | 734               | 49                | 414  | 77                |
|             | 2006  | 14544            | 8062             | 444              | 3174             | 1049             | 730              | 67               | 701              | 1898             | 0                 | 6482              | 1128             | 182              | 65               | 145               | 1680             | 1519             | 524               | 43                | 708               | 34                | 381  | 74                |
|             | 2007  | 13681            | 7584             | 406              | 3011             | 972              | 654              | 63               | 650              | 1828             | 0                 | 6097              | 1034             | 179              | 64               | 134               | 1584             | 1457             | 469               | 47                | 684               | 29                | 343  | 72                |
|             | 2008  | 12815            | 7180             | 374              | 2881             | 907              | 580              | 58               | 603              | 1776             | 0                 | 5635              | 938              | 175              | 63               | 122               | 1417             | 1380             | 416               | 95                | 652               | 30                | 277  | 69                |
|             | 2009  | 12073            | 6716             | 343              | 2722             | 839              | 504              | 57               | 552              | 1700             | 0                 | 5357              | 880              | 176              | 63               | 114               | 1383             | 1344             | 383               | 74                | 641               | 21                | 211  | 66                |
|             | 2010  | 11476            | 6372             | 317              | 2601             | 790              | 452              | 56               | 515              | 1641             | 0                 | 5104              | 832              | 177              | 64               | 108               | 1360             | 1311             | 356               | 37                | 632               | 24                | 138  | 65                |
|             | 2011  | 10939            | 6056             | 290              | 2481             | 747              | 410              | 55               | 490              | 1583             | 0                 | 4883              | 783              | 177              | 64               | 101               | 1310             | 1271             | 331               | 37                | 612               | 13                | 121  | 63                |
|             | 2012  | 10450            | 5771             | 265              | 2370             | 709              | 380              | 52               | 469              | 1526             | 0                 | 4679              | 736              | 178              | 64               | 94                | 1230             | 1234             | 307               | 64                | 591               | 11                | 108  | 62                |
|             | 2013  | 10058            | 5571             | 247              | 2290             | 684              | 358              | 51               | 457              | 1486             | 0                 | 4487              | 697              | 178              | 64               | 88                | 1206             | 1198             | 288               | 36                | 569               | 11                | 92   | 59                |
|             | 2014  | 9560             | 5279             | 223              | 2172             | 648              | 333              | 48               | 436              | 1420             | 0                 | 4281              | 655              | 178              | 64               | 82                | 1155             | 1159             | 268               | 35                | 542               | 7                 | 79   | 57                |
| 2015        | 9173  | 4958             | 204              | 2040             | 608              | 304              | 45               | 414              | 1342             | 0                | 4215              | 609               | 178              | 64               | 79               | 1136              | 1150             | 260              | 34                | 535               | 6                 | 78                | 56   |                   |
| Timor-Leste | 2000  | 4318             | 1479             | 112              | 456              | 448              | 185              | 55               | 114              | 91               | 17                | 2839              | 866              | 68               | 35               | 141               | 418              | 69               | 677               | 0                 | 217               | 311               | 0    | 37                |
|             | 2001  | 3970             | 1351             | 104              | 397              | 417              | 182              | 46               | 101              | 89               | 15                | 2619              | 790              | 62               | 32               | 135               | 381              | 63               | 589               | 0                 | 203               | 326               | 0    | 37                |
|             | 2002  | 3647             | 1241             | 96               | 335              | 392              | 185              | 39               | 94               | 87               | 13                | 2406              | 771              | 60               | 31               | 136               | 370              | 62               | 548               | 0                 | 203               | 185               | 0    | 40                |
|             | 2003  | 3336             | 1139             | 88               | 290              | 363              | 182              | 31               | 89               | 85               | 12                | 2197              | 710              | 55               | 29               | 126               | 341              | 57               | 482               | 0                 | 192               | 166               | 0    | 39                |
|             | 2004  | 3027             | 1046             | 81               | 257              | 333              | 175              | 24               | 84               | 83               | 10                | 1981              | 505              | 39               | 21               | 87                | 242              | 41               | 326               | 0                 | 140               | 550               | 0    | 29                |
|             | 2005  | 2728             | 950              | 73               | 234              | 301              | 158              | 19               | 77               | 79               | 9                 | 1778              | 513              | 40               | 21               | 83                | 244              | 41               | 316               | 0                 | 146               | 340               | 1    | 33                |
|             | 2006  | 2455             | 876              | 67               | 216              | 275              | 147              | 16               | 71               | 77               | 8                 | 1579              | 435              | 34               | 18               | 67                | 203              | 35               | 256               | 0                 | 127               | 370               | 1    | 33                |
|             | 2007  | 2210             | 806              | 61               | 197              | 252              | 136              | 13               | 66               | 74               | 7                 | 1404              | 442              | 34               | 18               | 64                | 203              | 36               | 248               | 0                 | 131               | 188               | 1    | 38                |
|             | 2008  | 2025             | 754              | 56               | 179              | 235              | 132              | 10               | 63               | 73               | 6                 | 1271              | 413              | 32               | 17               | 57                | 186              | 34               | 223               | 0                 | 126               | 142               | 1    | 41                |
|             | 2009  | 1932             | 741              | 54               | 169              | 232              | 132              | 8                | 64               | 76               | 5                 | 1191              | 406              | 32               | 17               | 54                | 176              | 33               | 209               | 0                 | 126               | 89                | 2    | 48                |
|             | 2010  | 1947             | 762              | 56               | 169              | 238              | 138              | 7                | 68               | 81               | 5                 | 1185              | 406              | 32               | 17               | 53                | 177              | 33               | 201               | 0                 | 128               | 90                | 2    | 48                |
|             | 2011  | 2058             | 842              | 61               | 185              | 262              | 152              | 7                | 76               | 93               | 5                 | 1216              | 426              | 33               | 18               | 54                | 186              | 35               | 203               | 0                 | 136               | 72                | 2    | 51                |
|             | 2012  | 2256             | 948              | 68               | 209              | 292              | 173              | 8                | 85               | 108              | 6                 | 1308              | 470              | 37               | 20               | 60                | 213              | 38               | 216               | 0                 | 152               | 48                | 4    | 50                |
|             | 2013  | 2467             | 1058             | 75               | 234              | 322              | 196              | 8                | 94               | 123              | 6                 | 1409              | 440              | 44               | 24               | 47                | 266              | 47               | 251               | 0                 | 187               | 44                | 4    | 55                |
|             | 2014  | 2612             | 1140             | 80               | 253              | 343              | 213              | 8                | 100              | 135</            |                   |                   |                  |                  |                  |                   |                  |                  |                   |                   |                   |                   |      |                   |

Webappendix 6. Estimated numbers of deaths by cause in neonates, children aged 1-59 months at the global, regional and country levels in 2000-2015

| Year       | 0-28 days        |                  |                  |                  |                  |                  |                  |                  |                  |                   | 1-59 months       |                  |                  |                  |                   |                  |                  |                   |                   |                   |                   |      |                   |      |
|------------|------------------|------------------|------------------|------------------|------------------|------------------|------------------|------------------|------------------|-------------------|-------------------|------------------|------------------|------------------|-------------------|------------------|------------------|-------------------|-------------------|-------------------|-------------------|------|-------------------|------|
|            | USD <sup>1</sup> | NEO <sup>2</sup> | PNE <sup>3</sup> | PRE <sup>4</sup> | INT <sup>5</sup> | SEP <sup>6</sup> | TET <sup>7</sup> | OTH <sup>8</sup> | CON <sup>9</sup> | DIA <sup>10</sup> | POS <sup>11</sup> | PNE <sup>3</sup> | PRE <sup>4</sup> | INT <sup>5</sup> | MEN <sup>12</sup> | OTH <sup>8</sup> | CON <sup>9</sup> | DIA <sup>10</sup> | MEA <sup>13</sup> | INJ <sup>14</sup> | MAL <sup>15</sup> | AIDS | PER <sup>16</sup> |      |
| Bangladesh | 2011             | 113006           | 41052            | 2849             | 12210            | 11325            | 7482             | 1225             | 2980             | 2419              | 563               | 71954            | 21327            | 2696             | 674               | 3497             | 14568            | 2587              | 14671             | 3739              | 6843              | 72   | 34                | 1247 |
|            | 2012             | 108496           | 39588            | 2700             | 12200            | 10738            | 7073             | 1160             | 2818             | 2361              | 538               | 68908            | 20561            | 2595             | 649               | 3343             | 14256            | 2495              | 13581             | 3489              | 6661              | 37   | 36                | 1206 |
|            | 2013             | 100914           | 38263            | 2566             | 12034            | 10248            | 6844             | 1037             | 2703             | 2322              | 508               | 62651            | 19552            | 2495             | 624               | 3132             | 13966            | 2405              | 12559             | 223               | 6479              | 28   | 38                | 1150 |
|            | 2014             | 97692            | 37038            | 2444             | 11817            | 9814             | 6673             | 911              | 2608             | 2295              | 476               | 60654            | 17046            | 2528             | 632               | 2477             | 14461            | 2442              | 12234             | 1022              | 6641              | 31   | 39                | 1103 |
|            | 2015             | 94261            | 36242            | 2353             | 11756            | 9494             | 6536             | 818              | 2538             | 2297              | 450               | 58019            | 16331            | 2426             | 606               | 2367             | 14117            | 2349              | 11285             | 973               | 6447              | 27   | 37                | 1055 |
|            | 2000             | 317011           | 154428           | 11817            | 42522            | 38231            | 34342            | 3943             | 11819            | 9651              | 2104              | 162583           | 50526            | 4226             | 1591              | 9862             | 24690            | 3745              | 36333             | 12653             | 14023             | 4224 | 2                 | 708  |
|            | 2001             | 300606           | 148315           | 11195            | 41772            | 36019            | 33237            | 3345             | 11276            | 9561              | 1909              | 152291           | 47817            | 3966             | 1577              | 9244             | 23537            | 3610              | 32872             | 11187             | 13564             | 4219 | 2                 | 696  |
|            | 2002             | 283060           | 142672           | 10616            | 41014            | 34118            | 31978            | 2885             | 10766            | 9550              | 1745              | 140388           | 42917            | 3530             | 1484              | 12559            | 21255            | 3307              | 28203             | 9488              | 12450             | 4499 | 3                 | 693  |
|            | 2003             | 267975           | 136668           | 10036            | 39771            | 32515            | 30391            | 2504             | 10253            | 9589              | 1609              | 131307           | 39830            | 3247             | 1440              | 11535            | 19888            | 3131              | 25039             | 10036             | 11806             | 4683 | 4                 | 667  |
|            | 2004             | 262810           | 130245           | 9428             | 37901            | 31105            | 28734            | 2155             | 9754             | 9676              | 1492              | 132565           | 38009            | 3066             | 1437              | 10890            | 19156            | 3040              | 22857             | 20973             | 11512             | 975  | 5                 | 646  |
|            | 2005             | 245834           | 123764           | 8821             | 35603            | 29985            | 26997            | 1850             | 9288             | 9835              | 1384              | 122070           | 36104            | 2882             | 1427              | 6687             | 18383            | 2944              | 20777             | 20079             | 11169             | 977  | 6                 | 636  |
|            | 2006             | 224887           | 117106           | 8213             | 33143            | 28819            | 25295            | 1577             | 8816             | 9981              | 1262              | 107781           | 33089            | 2653             | 1321              | 6048             | 16996            | 2744              | 18221             | 14845             | 10456             | 768  | 8                 | 632  |
|            | 2007             | 195983           | 109823           | 7581             | 30786            | 27256            | 23513            | 1337             | 8267             | 9964              | 1119              | 86160            | 30206            | 2433             | 1218              | 5450             | 15665            | 2549              | 15924             | 1612              | 9744              | 741  | 9                 | 609  |
|            | 2008             | 183218           | 103027           | 6989             | 28834            | 25568            | 21909            | 1131             | 7737             | 9873              | 986               | 80191            | 27042            | 2185             | 1103              | 4813             | 14167            | 2320              | 13647             | 4073              | 8906              | 1336 | 10                | 589  |
|            | 2009             | 168511           | 96815            | 6453             | 27253            | 23826            | 20507            | 949              | 7247             | 9708              | 872               | 71696            | 20637            | 2282             | 1160              | 2788             | 14962            | 2453              | 13594             | 3002              | 9451              | 771  | 11                | 584  |
| 2010       | 157045           | 91438            | 5988             | 25990            | 22233            | 19297            | 799              | 6822             | 9528             | 781               | 65607             | 19066            | 2096             | 1070             | 2573              | 13830            | 2279             | 11922             | 2873              | 8810              | 498               | 12   | 579               |      |
| 2011       | 149236           | 86839            | 5584             | 24933            | 20843            | 18251            | 677              | 6452             | 9395             | 704               | 62397             | 17381            | 1928             | 988              | 2308              | 12794            | 2122             | 10458             | 5136              | 8213              | 479               | 14   | 575               |      |
| 2012       | 137961           | 82874            | 5235             | 24071            | 19632            | 17303            | 585              | 6118             | 9288             | 641               | 55087             | 16029            | 1787             | 919              | 2108              | 11924            | 1990             | 9254              | 2199              | 7713              | 565               | 17   | 581               |      |
| 2013       | 130611           | 79859            | 4956             | 23490            | 18659            | 16567            | 514              | 5851             | 9228             | 593               | 50752             | 14822            | 1662             | 855              | 2103              | 11188            | 1869             | 8216              | 1679              | 7247              | 556               | 18   | 537               |      |
| 2014       | 125294           | 77111            | 4702             | 23000            | 17770            | 15881            | 457              | 5603             | 9146             | 552               | 48183             | 13885            | 1567             | 806              | 1963              | 10641            | 1780             | 7403              | 2421              | 6890              | 306               | 18   | 503               |      |
| 2015       | 119326           | 74378            | 4455             | 22507            | 16898            | 15210            | 408              | 5358             | 9027             | 515               | 44948             | 12953            | 1470             | 756              | 1825              | 10081            | 1688             | 6648              | 2266              | 6516              | 258               | 17   | 470               |      |
| 2000       | 1284             | 518              | 36               | 135              | 146              | 110              | 7                | 41               | 40               | 5                 | 766               | 242              | 25               | 11               | 38                | 140              | 34               | 169               | 31                | 70                | 4                 | 1    | 2                 |      |
| 2001       | 1223             | 497              | 33               | 133              | 138              | 104              | 6                | 39               | 40               | 4                 | 726               | 221              | 23               | 10               | 34                | 131              | 32               | 147               | 57                | 65                | 4                 | 2    | 2                 |      |
| 2002       | 1091             | 471              | 31               | 129              | 129              | 98               | 5                | 37               | 40               | 4                 | 620               | 201              | 21               | 9                | 31                | 123              | 29               | 128               | 10                | 61                | 3                 | 2    | 2                 |      |
| 2003       | 1002             | 448              | 28               | 126              | 120              | 93               | 4                | 34               | 39               | 3                 | 554               | 180              | 19               | 8                | 27                | 113              | 27               | 110               | 5                 | 56                | 4                 | 3    | 2                 |      |
| 2004       | 925              | 426              | 26               | 124              | 111              | 88               | 3                | 32               | 39               | 3                 | 499               | 163              | 17               | 8                | 24                | 105              | 25               | 95                | 4                 | 52                | 2                 | 4    | 2                 |      |
| 2005       | 861              | 407              | 24               | 122              | 104              | 83               | 3                | 30               | 39               | 2                 | 454               | 148              | 16               | 7                | 22                | 98               | 23               | 83                | 3                 | 48                | 1                 | 4    | 2                 |      |
| 2006       | 811              | 394              | 23               | 120              | 98               | 80               | 3                | 29               | 40               | 2                 | 417               | 136              | 14               | 6                | 20                | 91               | 22               | 73                | 3                 | 45                | 2                 | 4    | 2                 |      |
| 2007       | 768              | 384              | 22               | 119              | 94               | 77               | 2                | 27               | 41               | 2                 | 384               | 125              | 13               | 6                | 18                | 86               | 21               | 64                | 0                 | 42                | 0                 | 5    | 2                 |      |
| 2008       | 729              | 373              | 21               | 117              | 89               | 75               | 2                | 26               | 41               | 2                 | 356               | 116              | 13               | 6                | 16                | 81               | 19               | 57                | 0                 | 40                | 0                 | 6    | 2                 |      |
| 2009       | 686              | 358              | 19               | 114              | 84               | 71               | 2                | 25               | 41               | 1                 | 328               | 106              | 12               | 5                | 15                | 76               | 18               | 50                | 1                 | 37                | 1                 | 6    | 2                 |      |
| 2010       | 637              | 337              | 18               | 109              | 77               | 66               | 1                | 23               | 41               | 1                 | 300               | 96               | 11               | 5                | 13                | 70               | 17               | 43                | 1                 | 35                | 0                 | 7    | 2                 |      |
| 2011       | 587              | 314              | 16               | 104              | 70               | 60               | 1                | 21               | 39               | 1                 | 273               | 88               | 10               | 4                | 12                | 64               | 16               | 38                | 1                 | 32                | 0                 | 7    | 2                 |      |
| 2012       | 534              | 287              | 15               | 97               | 63               | 54               | 1                | 19               | 37               | 1                 | 247               | 65               | 10               | 4                | 7                 | 65               | 16               | 36                | 1                 | 33                | 0                 | 8    | 2                 |      |
| 2013       | 484              | 262              | 13               | 91               | 57               | 48               | 1                | 17               | 35               | 1                 | 222               | 58               | 9                | 4                | 6                 | 59               | 14               | 31                | 1                 | 30                | 0                 | 8    | 2                 |      |
| 2014       | 444              | 242              | 12               | 85               | 51               | 43               | 1                | 15               | 33               | 1                 | 202               | 53               | 8                | 4                | 5                 | 54               | 13               | 28                | 1                 | 27                | 0                 | 7    | 2                 |      |
| 2015       | 414              | 226              | 11               | 81               | 47               | 39               | 1                | 14               | 32               | 1                 | 188               | 49               | 8                | 3                | 5                 | 51               | 13               | 25                | 1                 | 26                | 0                 | 6    | 2                 |      |
| 2000       | 2514889          | 1253657          | 86070            | 416944           | 315114           | 189886           | 59557            | 86935            | 80661            | 18490             | 1261231           | 395234           | 38238            | 10890            | 66575             | 222887           | 42665            | 319302            | 71695             | 68618             | 11796             | 7643 | 5688              |      |
| 2001       | 2443341          | 1215523          | 82589            | 409494           | 303365           | 185364           | 53151            | 84106            | 79793            | 17662             | 1227818           | 377078           | 37647            | 10847            | 63517             | 212313           | 42376            | 300556            | 91725             | 67184             | 10325             | 8488 | 5762              |      |
| 2002       | 2337203          | 1175504          | 78909            | 401691           | 290827           | 180266           | 47236            | 81042            | 78771            | 16763             | 1161699           | 358723           | 36944            | 10757            | 60425             | 201630           | 41985            | 282158            | 79143             | 65598             | 9443              | 9064 | 5830              |      |
| 2003       | 2249583          | 1134014          | 75106            | 393515           | 277713           | 174674           | 41738            | 77773            | 77690            | 15805             | 1115569           | 340667           | 36163            | 10644            | 57384             | 191315           | 41543            | 264499            | 85297             | 63938             | 9076              | 9339 | 5702              |      |
| 2004       | 2139049          | 1091529          | 71237            | 384951           | 264243           | 168698           | 36624            | 74368            | 76604            | 14803             | 1047520           | 321971           | 35219            | 10488            | 54234             | 180611           | 40920            | 246839            | 69844             | 62017             | 10420             | 9362 | 5594              |      |
| 2005       | 2037087          | 1054134          | 67722            | 378027           | 251955           | 163306           | 32083            | 71256            | 75939            | 13847             | 982952            | 303801           | 34182            | 10285            | 51174             | 170138           | 40232            | 230047            | 57163             | 60039             | 11286             | 9047 | 5559              |      |
| 2006       | 1975025          | 1016659          | 64241            | 370841           | 239628           | 157716           | 27945            | 68088            | 75326            | 12874             | 958366            | 287153           | 33523            | 9814             | 48369             | 160614           | 39571            | 214875            | 82781             | 58172             | 9518              | 8521 | 5455              |      |
| 2007       | 1867629          | 981810           | 60965            | 364355           | 227918           | 152321           | 24303            | 65058            | 74957            | 11932             | 885819            | 269832           | 32653            | 9299             | 45452             | 150570           | 38686            | 199624            | 60878             | 56012             | 9552              | 7781 | 5481              |      |
| 2008       | 1783995          | 946336           | 57717            | 357415           | 216042           | 146601           | 21069            | 61921            | 74576            | 10995             | 837659            | 253086           | 31722            | 8771             | 42631             | 141206           | 37710            | 185236            | 60791             | 53781             | 10612             | 6953 | 5161              |      |
| 2009       | 1711551          | 909587           | 54425            | 349795           | 203849           | 140451           | 18182            | 58672            | 74151            | 10063             | 801964            | 235911           | 30612            | 8219             | 39738             | 131348           | 36448            | 170985            | 73583             | 51233             | 12519             | 6282 | 5086              |      |
| 2010       | 1602003          | 871304           | 51090            | 341361           | 191315           | 133841           | 15558            | 55296            | 73705            | 9138              | 730699            | 220764           | 29625            | 7732             | 37187             | 122620           | 35320            | 158504            | 48418             | 48959             | 10746             | 5770 | 5054              |      |
| 2011       | 1512325          | 831083           | 47699            | 331801           | 178451           | 126723           | 13130            | 51791            | 73274            | 8215              | 681241            | 206481           | 28621            | 7245             | 34781             | 114339           | 34142            | 146956            | 42422             | 46698             | 9156              | 5326 | 5075              |      |
| 2012       | 1412260          | 792589           | 44476            | 322342           | 166158           | 119666           | 10938            | 48418            | 73258            | 7333              | 619671            | 190548           | 27174            | 6794             | 32097             | 105070           | 32430            | 134575            | 28061             | 43838             | 9039              | 4915 | 5129              |      |
| 2013       | 1328929          | 752702           | 41282            | 311508           | 153870           | 112239           | 8945             | 45007            | 73383            | 6470              | 576227            | 176053           | 26362            | 6591             | 28969             | 99504            | 31769            | 126234            | 21000             | 42338             | 8041              | 4580 | 4788              |      |
| 2014       | 1260762          | 721743           | 38686            | 303388           | 143792           | 106019           | 7299             | 42218            | 74607            | 5734              | 539019            | 162337           | 25000            | 6250             | 26564             | 92305            | 30219            | 116288            | 24226             | 39867             | 7213              | 4307 | 4443              |      |
| 2015       | 1200998          | 695852           | 36497            | 296177           | 135303           | 100451           | 5973             | 39870            | 76470            | 5112              | 505146            | 143228           | 24851            | 6213             | 21106             | 90016            | 30253            | 112277            | 22897             | 39478             | 6627              | 4036 | 4164              |      |
| 2000       | 44855            | 24636            | 1306             | 8763             | 5502             | 3590             | 111              | 1564             | 3729             | 71                | 20219             | 6052             | 858              | 214              | 701               | 4619             | 1416             | 3660              | 154               | 2299              | 1                 | 15   | 231               |      |
| 2001       | 41515            | 23334            | 1221             | 8375             | 5139             | 3324             | 98               | 1470             | 3643             | 64                | 18181             | 5460             | 783              | 196              |                   |                  |                  |                   |                   |                   |                   |      |                   |      |



Webappendix 6. Estimated numbers of deaths by cause in neonates, children aged 1-59 months at the global, regional and country levels in 2000-2015

| Year               | 0-28 days        |                  |                  |                  |                  |                  |                  |                  |                  |                   | 1-59 months       |                  |                  |                  |                   |                  |                  |                   |                   |                   |                   |        |                   |       |
|--------------------|------------------|------------------|------------------|------------------|------------------|------------------|------------------|------------------|------------------|-------------------|-------------------|------------------|------------------|------------------|-------------------|------------------|------------------|-------------------|-------------------|-------------------|-------------------|--------|-------------------|-------|
|                    | USD <sup>1</sup> | NEO <sup>2</sup> | PNE <sup>3</sup> | PRE <sup>4</sup> | INT <sup>5</sup> | SEP <sup>6</sup> | TET <sup>7</sup> | OTH <sup>8</sup> | CON <sup>9</sup> | DIA <sup>10</sup> | POS <sup>11</sup> | PNE <sup>3</sup> | PRE <sup>4</sup> | INT <sup>5</sup> | MEN <sup>12</sup> | OTH <sup>8</sup> | CON <sup>9</sup> | DIA <sup>10</sup> | MEA <sup>13</sup> | INJ <sup>14</sup> | MAL <sup>15</sup> | AIDS   | PER <sup>16</sup> |       |
| Sri Lanka          | 2006             | 439164           | 233735           | 15690            | 76127            | 55211            | 43608            | 10955            | 16623            | 12134             | 3388              | 205429           | 69068            | 4830             | 4069              | 10313            | 36144            | 6912              | 44964             | 5230              | 18188             | 1068   | 62                | 4579  |
|                    | 2007             | 445798           | 240970           | 15971            | 80034            | 56146            | 45257            | 10427            | 17119            | 12581             | 3436              | 204828           | 69582            | 4887             | 4100              | 10294            | 36889            | 7008              | 43753             | 3856              | 18482             | 1156   | 75                | 4745  |
|                    | 2008             | 453906           | 250014           | 16634            | 84176            | 57552            | 47615            | 9848             | 17840            | 13156             | 3493              | 203892           | 70610            | 4975             | 4159              | 10375            | 37591            | 7142              | 42882             | 1327              | 18919             | 567    | 91                | 5253  |
|                    | 2009             | 462758           | 257989           | 16634            | 88255            | 58701            | 49362            | 9425             | 18374            | 13693             | 3545              | 204769           | 62131            | 5565             | 4632              | 7588             | 43059            | 7994              | 46174             | 651               | 21262             | 242    | 109               | 5362  |
|                    | 2010             | 469801           | 263193           | 16702            | 92050            | 58979            | 50114            | 9184             | 18520            | 14078             | 3567              | 206608           | 61357            | 5619             | 4663              | 7308             | 44202            | 8072              | 44929             | 3009              | 21613             | 409    | 129               | 5298  |
|                    | 2011             | 470354           | 263319           | 16476            | 94822            | 58244            | 48800            | 8994             | 18180            | 14251             | 3553              | 207035           | 62491            | 5576             | 4635              | 7619             | 44434            | 8027              | 43054             | 3575              | 21640             | 446    | 151               | 5385  |
|                    | 2012             | 466145           | 261003           | 16105            | 96494            | 56980            | 47290            | 8582             | 17722            | 14339             | 3491              | 205142           | 61824            | 5485             | 4566              | 7556             | 44430            | 7917              | 40841             | 5211              | 21490             | 399    | 178               | 5245  |
|                    | 2013             | 458601           | 255837           | 15583            | 96593            | 55225            | 45647            | 7904             | 17185            | 14321             | 3379              | 202764           | 52707            | 5792             | 4822              | 5612             | 47949            | 8377              | 41541             | 7443              | 22907             | 253    | 208               | 5152  |
|                    | 2014             | 442647           | 251055           | 15080            | 96317            | 53519            | 44626            | 7188             | 16751            | 14335             | 3239              | 191592           | 50723            | 5621             | 4679              | 5364             | 47197            | 8145              | 38808             | 3082              | 22452             | 301    | 250               | 4970  |
|                    | 2015             | 431568           | 244746           | 14507            | 95360            | 51545            | 43348            | 6410             | 16225            | 14262             | 3088              | 186822           | 49578            | 5502             | 4580              | 5239             | 46841            | 7990              | 36586             | 2948              | 22193             | 273    | 244               | 4848  |
|                    | 2000             | 5464             | 3387             | 182              | 1229             | 445              | 217              | 25               | 512              | 776               | 0                 | 2077             | 367              | 19               | 13                | 51               | 541              | 515               | 223               | 0                 | 299               | 18     | 1                 | 30    |
|                    | 2001             | 5350             | 3326             | 170              | 1202             | 433              | 214              | 26               | 515              | 767               | 0                 | 2024             | 346              | 20               | 14                | 48               | 545              | 509               | 206               | 0                 | 294               | 11     | 2                 | 30    |
|                    | 2002             | 5328             | 3337             | 162              | 1201             | 431              | 211              | 29               | 529              | 774               | 0                 | 1991             | 329              | 21               | 14                | 46               | 552              | 505               | 194               | 0                 | 291               | 6      | 2                 | 31    |
|                    | 2003             | 5369             | 3365             | 157              | 1208             | 433              | 214              | 28               | 543              | 783               | 0                 | 2004             | 321              | 23               | 15                | 45               | 572              | 512               | 186               | 0                 | 296               | 1      | 2                 | 31    |
|                    | 2004             | 10358            | 3458             | 154              | 1238             | 444              | 215              | 28               | 569              | 810               | 0                 | 6900             | 295              | 23               | 16                | 42               | 552              | 492               | 169               | 0                 | 5277              | 0      | 2                 | 32    |
|                    | 2005             | 5181             | 3248             | 138              | 1164             | 418              | 193              | 32               | 531              | 771               | 0                 | 1933             | 287              | 26               | 17                | 41               | 570              | 509               | 161               | 0                 | 286               | 0      | 3                 | 33    |
|                    | 2006             | 4924             | 3079             | 125              | 1105             | 396              | 178              | 30               | 502              | 743               | 0                 | 1845             | 263              | 27               | 18                | 37               | 551              | 497               | 144               | 0                 | 271               | 0      | 4                 | 33    |
|                    | 2007             | 4661             | 2885             | 113              | 1037             | 371              | 157              | 29               | 472              | 707               | 0                 | 1776             | 243              | 28               | 19                | 35               | 535              | 489               | 131               | 0                 | 259               | 0      | 4                 | 33    |
|                    | 2008             | 4368             | 2672             | 101              | 962              | 343              | 138              | 27               | 439              | 663               | 0                 | 1696             | 222              | 29               | 20                | 32               | 516              | 477               | 118               | 0                 | 245               | 0      | 4                 | 33    |
|                    | 2009             | 4127             | 2485             | 91               | 895              | 318              | 120              | 26               | 412              | 622               | 0                 | 1642             | 208              | 31               | 21                | 30               | 502              | 470               | 108               | 0                 | 236               | 0      | 4                 | 34    |
|                    | 2010             | 3912             | 2292             | 82               | 827              | 292              | 97               | 33               | 382              | 578               | 0                 | 1620             | 182              | 49               | 34                | 36               | 489              | 487               | 91                | 0                 | 213               | 0      | 5                 | 33    |
|                    | 2011             | 3718             | 2129             | 74               | 769              | 270              | 85               | 33               | 358              | 540               | 0                 | 1589             | 173              | 52               | 36                | 34               | 482              | 481               | 84                | 0                 | 208               | 0      | 6                 | 33    |
|                    | 2012             | 3547             | 1997             | 67               | 723              | 252              | 79               | 31               | 336              | 509               | 0                 | 1550             | 164              | 54               | 38                | 32               | 473              | 471               | 77                | 0                 | 203               | 0      | 6                 | 33    |
|                    | 2013             | 3375             | 1867             | 61               | 676              | 235              | 73               | 29               | 315              | 478               | 0                 | 1508             | 155              | 56               | 39                | 30               | 462              | 459               | 71                | 0                 | 196               | 0      | 7                 | 32    |
|                    | 2014             | 3218             | 1782             | 57               | 646              | 224              | 69               | 27               | 300              | 458               | 0                 | 1436             | 145              | 57               | 40                | 28               | 442              | 437               | 66                | 0                 | 184               | 0      | 7                 | 31    |
|                    | 2015             | 3091             | 1683             | 53               | 610              | 211              | 65               | 26               | 285              | 434               | 0                 | 1408             | 139              | 57               | 40                | 26               | 435              | 431               | 63                | 0                 | 181               | 0      | 7                 | 30    |
| Sub-Saharan Africa | 2000             | 4272148          | 1104867          | 83576            | 327390           | 341057           | 161376           | 57805            | 62076            | 61111             | 10474             | 3167281          | 596330           | 51741            | 28282             | 145183           | 319632           | 66981             | 557971            | 340135            | 124808            | 699363 | 205147            | 31708 |
|                    | 2001             | 4223624          | 1103540          | 83594            | 326429           | 341592           | 165140           | 52670            | 62766            | 61114             | 10235             | 3120084          | 597031           | 51926            | 28477             | 149546           | 320995           | 67701             | 535278            | 310990            | 127257            | 688074 | 210471            | 32338 |
|                    | 2002             | 4108332          | 1099727          | 83323            | 324253           | 341000           | 169184           | 47342            | 63356            | 61333             | 9935              | 3008605          | 585192           | 52051            | 28682             | 142975           | 322035           | 68495             | 512179            | 242262            | 129762            | 678929 | 213084            | 32959 |
|                    | 2003             | 4087690          | 1095255          | 82815            | 322041           | 339440           | 173498           | 42359            | 63707            | 61813             | 9581              | 2992435          | 572735           | 51140            | 28386             | 148323           | 316932           | 68088             | 480324            | 287224            | 129797            | 663120 | 213281            | 33084 |
|                    | 2004             | 3889732          | 1089637          | 82067            | 319230           | 336995           | 178076           | 37689            | 63859            | 62559             | 9162              | 2800095          | 567381           | 51210            | 28545             | 138497           | 317523           | 68844             | 458329            | 163864            | 132350            | 629578 | 210594            | 33381 |
|                    | 2005             | 3837005          | 1083682          | 81189            | 316224           | 334081           | 182240           | 33839            | 63790            | 63605             | 8714              | 2753323          | 558224           | 50766            | 28452             | 143224           | 314649           | 69148             | 432979            | 187810            | 133395            | 595406 | 205671            | 33601 |
|                    | 2006             | 3621425          | 1075262          | 80018            | 312550           | 330171           | 185358           | 30549            | 63684            | 64678             | 8253              | 2546163          | 556557           | 51337            | 28834             | 115587           | 318399           | 70726             | 417023            | 48855             | 136888            | 569481 | 198609            | 33867 |
|                    | 2007             | 3524667          | 1068956          | 79114            | 309118           | 326308           | 189557           | 27675            | 63153            | 66207             | 7824              | 2455711          | 539984           | 51831            | 29126             | 110609           | 321494           | 72215             | 401129            | 36472             | 140073            | 530918 | 187926            | 33936 |
|                    | 2008             | 3463594          | 1062192          | 77942            | 305564           | 322404           | 192687           | 25066            | 63200            | 67877             | 7452              | 2401402          | 526545           | 51950            | 29280             | 121459           | 322692           | 73353             | 382663            | 60864             | 142468            | 483614 | 172474            | 34039 |
|                    | 2009             | 3374372          | 1056974          | 77011            | 303586           | 319263           | 193726           | 23155            | 63282            | 69773             | 7177              | 2317398          | 508510           | 53099            | 30061             | 98457            | 331872           | 75945             | 372548            | 55796             | 147839            | 452450 | 156784            | 34038 |
|                    | 2010             | 3293859          | 1052345          | 76425            | 304753           | 315964           | 191895           | 22213            | 62242            | 71823             | 7030              | 2241514          | 506381           | 53625            | 30457             | 85029            | 336077           | 77558             | 358834            | 59830             | 151372            | 411508 | 136278            | 34564 |
|                    | 2011             | 3260239          | 1046671          | 75548            | 306459           | 312634           | 187711           | 21767            | 61436            | 74174             | 6941              | 2213568          | 497221           | 54334            | 30918             | 81850            | 341402           | 79344             | 346176            | 99618             | 155572            | 370942 | 120914            | 35276 |
|                    | 2012             | 3150724          | 1040591          | 74705            | 307835           | 308554           | 184540           | 21198            | 60568            | 76335             | 6856              | 2110133          | 477564           | 54728            | 31183             | 91086            | 344473           | 80720             | 331183            | 62598             | 158714            | 338092 | 103826            | 35968 |
|                    | 2013             | 3108944          | 1036411          | 73989            | 308817           | 305427           | 182965           | 20316            | 59836            | 78323             | 6738              | 2072533          | 452196           | 55802            | 31839             | 79503            | 353478           | 83027             | 320700            | 86924             | 163771            | 322181 | 88329             | 34784 |
|                    | 2014             | 2999404          | 1031544          | 73348            | 308157           | 302329           | 182290           | 19261            | 59339            | 80233             | 6588              | 1967860          | 425481           | 56785            | 32425             | 71261            | 361761           | 85250             | 305132            | 39283             | 168464            | 309151 | 79141             | 33727 |
|                    | 2015             | 2947137          | 1026860          | 72698            | 307528           | 299777           | 181034           | 18270            | 59064            | 82056             | 6433              | 1920277          | 418432           | 56170            | 32106             | 70070            | 358570           | 85172             | 288863            | 38218             | 168037            | 294613 | 77185             | 32842 |
| Angola             | 2000             | 157186           | 43116            | 3114             | 12244            | 13261            | 5219             | 3923             | 2229             | 2739              | 388               | 114070           | 27505            | 2406             | 1253              | 6695             | 15058            | 2999              | 29971             | 1292              | 4724              | 19827  | 1449              | 890   |
|                    | 2001             | 163043           | 44214            | 3184             | 12585            | 13568            | 5707             | 3730             | 2308             | 2741              | 391               | 118829           | 28173            | 2480             | 1300              | 6781             | 15659            | 3140              | 29692             | 3896              | 4877              | 20343  | 1611              | 878   |
|                    | 2002             | 167682           | 45094            | 3241             | 12858            | 13844            | 6158             | 3458             | 2393             | 2743              | 399               | 122588           | 29612            | 2629             | 1386              | 4588             | 16702            | 3394              | 30201             | 5036              | 5164              | 21211  | 1773              | 891   |
|                    | 2003             | 167942           | 46400            | 3335             | 13202            | 14351            | 6446             | 3331             | 2538             | 2790              | 407               | 121542           | 30482            | 2731             | 1447              | 4626             | 17422            | 3598              | 30075             | 1776              | 5357              | 21173  | 1931              | 922   |
|                    | 2004             | 169745           | 47568            | 3422             | 13533            | 14817            | 6695             | 3168             | 2686             | 2831              | 417               | 122177           | 31581            | 2860             | 1524              | 4664             | 18317            | 3856              | 30144             | 23                | 5594              | 20609  | 2072              | 933   |
|                    | 2005             | 173224           | 48603            | 3492             | 13859            | 15186            | 6987             | 2995             | 2811             | 2847              | 425               | 124621           | 32914            | 3011             | 1615              | 4745             | 19329            | 4152              | 30367             | 270               | 5882              | 19165  | 2203              | 969   |
|                    | 2006             | 176239           | 49499            | 3531             | 14246            | 15351            | 7450             | 2812             | 2862             | 2817              | 429               | 126740           | 34366            | 3189             | 1709              | 4831             | 20474            | 4502              | 30598             | 675               | 6207              | 16938  | 2249              | 1001  |
|                    | 2007             | 177174           | 50458            | 3575             | 14587            | 15496            | 8061             | 2629             | 2905             | 2777              | 428               | 126716           | 30148            | 3627             | 1941              | 3343             | 23425            | 5247              | 33002             | 165               | 7042              | 15553  | 2321              | 902   |
|                    | 2008             | 178009           | 50990            | 3586             | 14840            | 15517            | 8537             | 2429             | 2932             | 2721              | 428               | 127019           | 31124            | 3785             | 2017              | 3432             | 24412            | 5590              | 32657             | 261               | 7345              | 13107  | 2394              | 894   |
|                    | 2009             | 178779           | 51640            | 3612             | 15204            | 15623            | 8789             | 2338             | 2959             | 2686              | 429               | 127139           | 32120            |                  |                   |                  |                  |                   |                   |                   |                   |        |                   |       |

Webappendix 6. Estimated numbers of deaths by cause in neonates, children aged 1-59 months at the global, regional and country levels in 2000-2015

| Year                     | 0-28 days        |                  |                  |                  |                  |                  |                  |                  |                  |                   |                   | 1-59 months      |                  |                  |                   |                  |                  |                   |                   |                   |                   |       |                   |     |
|--------------------------|------------------|------------------|------------------|------------------|------------------|------------------|------------------|------------------|------------------|-------------------|-------------------|------------------|------------------|------------------|-------------------|------------------|------------------|-------------------|-------------------|-------------------|-------------------|-------|-------------------|-----|
|                          | USD <sup>1</sup> | NEO <sup>2</sup> | PNE <sup>3</sup> | PRE <sup>4</sup> | INT <sup>5</sup> | SEP <sup>6</sup> | TET <sup>7</sup> | OTH <sup>8</sup> | CON <sup>9</sup> | DIA <sup>10</sup> | POS <sup>11</sup> | PNE <sup>3</sup> | PRE <sup>4</sup> | INT <sup>5</sup> | MEN <sup>12</sup> | OTH <sup>8</sup> | CON <sup>9</sup> | DIA <sup>10</sup> | MEA <sup>13</sup> | INJ <sup>14</sup> | MAL <sup>15</sup> | AIDS  | PER <sup>16</sup> |     |
| 2001                     | 43305            | 10923            | 848              | 3340             | 3409             | 1739             | 300              | 626              | 556              | 105               | 32382             | 6668             | 523              | 306              | 1668              | 3553             | 606              | 5428              | 2412              | 1442              | 8021              | 1477  | 278               |     |
| 2002                     | 40702            | 11039            | 856              | 3294             | 3483             | 1806             | 277              | 649              | 574              | 100               | 29663             | 6554             | 515              | 303              | 2522              | 3532             | 603              | 5118              | 196               | 1442              | 7096              | 1497  | 285               |     |
| 2003                     | 40306            | 11249            | 869              | 3317             | 3577             | 1852             | 264              | 674              | 599              | 96                | 29057             | 6951             | 548              | 322              | 1759              | 3815             | 645              | 5202              | 18                | 1558              | 6450              | 1496  | 292               |     |
| 2004                     | 40253            | 11473            | 883              | 3374             | 3663             | 1885             | 254              | 695              | 627              | 92                | 28780             | 6188             | 621              | 366              | 1248              | 4407             | 734              | 5622              | 94                | 1796              | 5928              | 1473  | 302               |     |
| 2005                     | 40106            | 11715            | 897              | 3448             | 3742             | 1923             | 242              | 714              | 660              | 89                | 28391             | 6212             | 634              | 374              | 1864              | 4551             | 756              | 5461              | 128               | 1871              | 4836              | 1394  | 311               |     |
| 2006                     | 39911            | 12006            | 913              | 3524             | 3816             | 2003             | 227              | 738              | 698              | 87                | 27905             | 6395             | 669              | 396              | 1254              | 4865             | 804              | 5475              | 178               | 2018              | 4235              | 1299  | 317               |     |
| 2007                     | 39468            | 12261            | 923              | 3541             | 3872             | 2126             | 199              | 776              | 741              | 84                | 27207             | 6342             | 683              | 406              | 1205              | 5019             | 829              | 5301              | 52                | 2107              | 3746              | 1193  | 324               |     |
| 2008                     | 39274            | 12539            | 929              | 3539             | 3930             | 2271             | 170              | 833              | 788              | 80                | 26735             | 6438             | 681              | 406              | 1260              | 5035             | 833              | 5022              | 118               | 2147              | 3362              | 1087  | 347               |     |
| 2009                     | 39132            | 12720            | 930              | 3529             | 3961             | 2356             | 145              | 892              | 831              | 76                | 26412             | 6436             | 687              | 411              | 1249              | 5141             | 848              | 4835              | 147               | 2213              | 3135              | 950   | 360               |     |
| 2010                     | 38789            | 12974            | 940              | 3621             | 4012             | 2383             | 138              | 924              | 882              | 75                | 25815             | 6399             | 690              | 415              | 1232              | 5220             | 858              | 4633              | 78                | 2264              | 2889              | 766   | 370               |     |
| 2011                     | 38687            | 13088            | 943              | 3739             | 4017             | 2342             | 138              | 911              | 923              | 75                | 25599             | 6253             | 709              | 429              | 1163              | 5433             | 888              | 4558              | 78                | 2365              | 2722              | 620   | 381               |     |
| 2012                     | 38356            | 13169            | 940              | 3844             | 3997             | 2324             | 137              | 892              | 960              | 75                | 25187             | 5037             | 779              | 474              | 639               | 6077             | 984              | 4796              | 103               | 2639              | 2753              | 516   | 391               |     |
| 2013                     | 37823            | 13201            | 934              | 3908             | 3967             | 2311             | 133              | 880              | 995              | 73                | 24622             | 4992             | 776              | 472              | 634               | 6126             | 986              | 4572              | 31                | 2662              | 2566              | 422   | 383               |     |
| 2014                     | 37343            | 13261            | 929              | 3953             | 3948             | 2319             | 127              | 880              | 1034             | 71                | 24082             | 5070             | 787              | 479              | 658               | 6291             | 1007             | 3831              | 38                | 2733              | 2490              | 323   | 375               |     |
| 2015                     | 36970            | 13236            | 920              | 3982             | 3910             | 2292             | 122              | 874              | 1067             | 70                | 23734             | 5010             | 781              | 475              | 651               | 6306             | 1006             | 3647              | 37                | 2742              | 2392              | 318   | 369               |     |
| Cabo Verde               | 2000             | 453              | 218              | 10               | 81               | 39               | 20               | 6                | 30               | 31                | 0                 | 235              | 65               | 2                | 1                 | 6                | 31               | 32                | 44                | 28                | 14                | 0     | 10                | 1   |
| 2001                     | 403              | 196              | 9                | 72               | 34               | 14               | 10               | 27               | 31               | 0                 | 207               | 56               | 2                | 1                | 5                 | 29               | 30               | 36                | 25                | 12                | 0                 | 10    | 1                 |     |
| 2002                     | 367              | 177              | 8                | 64               | 31               | 16               | 5                | 24               | 30               | 0                 | 190               | 49               | 2                | 1                | 4                 | 27               | 29               | 30                | 25                | 11                | 1                 | 10    | 1                 |     |
| 2003                     | 342              | 164              | 7                | 59               | 28               | 15               | 3                | 21               | 29               | 0                 | 178               | 44               | 2                | 1                | 4                 | 25               | 27               | 26                | 25                | 11                | 1                 | 10    | 1                 |     |
| 2004                     | 326              | 156              | 7                | 57               | 27               | 14               | 3                | 19               | 28               | 0                 | 170               | 42               | 2                | 1                | 4                 | 25               | 27               | 23                | 25                | 10                | 1                 | 9     | 1                 |     |
| 2005                     | 320              | 152              | 7                | 57               | 26               | 12               | 3                | 18               | 28               | 0                 | 168               | 41               | 2                | 1                | 4                 | 25               | 27               | 21                | 25                | 11                | 1                 | 9     | 2                 |     |
| 2006                     | 304              | 152              | 8                | 58               | 26               | 12               | 3                | 17               | 28               | 0                 | 152               | 42               | 2                | 1                | 4                 | 26               | 28               | 20                | 7                 | 12                | 3                 | 7     | 1                 |     |
| 2007                     | 308              | 154              | 8                | 60               | 27               | 12               | 2                | 16               | 29               | 0                 | 154               | 42               | 3                | 1                | 4                 | 29               | 29               | 19                | 7                 | 12                | 1                 | 7     | 2                 |     |
| 2008                     | 313              | 158              | 8                | 62               | 27               | 13               | 2                | 16               | 30               | 0                 | 155               | 42               | 3                | 1                | 4                 | 30               | 29               | 18                | 7                 | 13                | 1                 | 5     | 2                 |     |
| 2009                     | 316              | 160              | 9                | 63               | 27               | 13               | 2                | 16               | 30               | 0                 | 156               | 41               | 3                | 1                | 4                 | 32               | 30               | 18                | 8                 | 13                | 1                 | 5     | 2                 |     |
| 2010                     | 311              | 159              | 9                | 63               | 27               | 14               | 1                | 16               | 30               | 0                 | 152               | 40               | 3                | 1                | 4                 | 34               | 30               | 18                | 3                 | 14                | 0                 | 5     | 2                 |     |
| 2011                     | 305              | 156              | 9                | 62               | 26               | 14               | 1                | 15               | 30               | 0                 | 149               | 35               | 4                | 1                | 4                 | 36               | 30               | 17                | 3                 | 12                | 1                 | 4     | 2                 |     |
| 2012                     | 296              | 150              | 8                | 59               | 25               | 13               | 1                | 15               | 29               | 0                 | 146               | 34               | 4                | 1                | 4                 | 37               | 30               | 16                | 3                 | 12                | 0                 | 3     | 2                 |     |
| 2013                     | 287              | 143              | 8                | 56               | 23               | 13               | 1                | 14               | 28               | 0                 | 144               | 33               | 4                | 1                | 4                 | 37               | 30               | 16                | 3                 | 12                | 0                 | 2     | 2                 |     |
| 2014                     | 277              | 138              | 7                | 54               | 22               | 12               | 1                | 13               | 28               | 0                 | 139               | 31               | 4                | 2                | 4                 | 35               | 29               | 15                | 4                 | 12                | 0                 | 2     | 2                 |     |
| 2015                     | 267              | 133              | 7                | 52               | 21               | 12               | 1                | 13               | 27               | 0                 | 134               | 29               | 4                | 1                | 3                 | 34               | 29               | 14                | 4                 | 12                | 0                 | 2     | 2                 |     |
| Cameroon                 | 2000             | 97581            | 21876            | 1609             | 7205             | 6895             | 3074             | 558              | 1219             | 1135              | 180               | 75705            | 14556            | 1407             | 758               | 2556             | 8628             | 2135              | 13613             | 4653              | 3118              | 18708 | 4828              | 746 |
| 2001                     | 99242            | 21630            | 1594             | 7064             | 6821             | 3123             | 497              | 1225             | 1134             | 173               | 77612             | 14080            | 1361             | 735              | 3768              | 8333             | 2073             | 12632             | 7005              | 3068              | 18770             | 5030  | 756               |     |
| 2002                     | 91181            | 21532            | 1587             | 6906             | 6792             | 3250             | 436              | 1249             | 1147             | 165               | 69649             | 13986            | 1356             | 733              | 2438              | 8286             | 2076             | 12005             | 223               | 3112              | 19530             | 5143  | 762               |     |
| 2003                     | 89713            | 21562            | 1586             | 6759             | 6792             | 3437             | 381              | 1280             | 1170             | 157               | 68151             | 13583            | 1320             | 715              | 2359              | 8038             | 2032             | 11151             | 150               | 3087              | 19761             | 5194  | 761               |     |
| 2004                     | 88593            | 21687            | 1586             | 6647             | 6803             | 3658             | 334              | 1313             | 1198             | 149               | 66906             | 13256            | 1291             | 701              | 2297              | 7834             | 1999             | 10417             | 359               | 3073              | 19711             | 5198  | 770               |     |
| 2005                     | 87587            | 21890            | 1590             | 6573             | 6839             | 3870             | 301              | 1342             | 1233             | 141               | 65697             | 13188            | 1287             | 701              | 2283              | 7817             | 2005             | 9937              | 514               | 3112              | 18867             | 5224  | 762               |     |
| 2006                     | 86174            | 21894            | 1579             | 6431             | 6828             | 4025             | 270              | 1367             | 1263             | 132               | 64280             | 13454            | 1317             | 720              | 2329              | 8012             | 2071             | 9721              | 404               | 3232              | 17084             | 5172  | 763               |     |
| 2007                     | 84516            | 21773            | 1565             | 6239             | 6822             | 4088             | 239              | 1403             | 1295             | 122               | 62743             | 13607            | 1335             | 732              | 3605              | 8124             | 2112             | 9435              | 224               | 3325              | 14382             | 5101  | 761               |     |
| 2008                     | 82905            | 21613            | 1549             | 6055             | 6808             | 4100             | 213              | 1448             | 1327             | 114               | 61292             | 14105            | 1387             | 762              | 3737              | 8470             | 2209             | 9393              | 160               | 3502              | 11874             | 4932  | 761               |     |
| 2009                     | 81385            | 21521            | 1543             | 5977             | 6821             | 4019             | 202              | 1480             | 1370             | 110               | 59864             | 12665            | 1572             | 866              | 1898              | 9670             | 2518             | 10193             | 282               | 4023              | 10659             | 4737  | 781               |     |
| 2010                     | 79233            | 21509            | 1543             | 5996             | 6825             | 3939             | 202              | 1476             | 1421             | 107               | 57724             | 12708            | 1602             | 885              | 1887              | 9895             | 2577             | 9956              | 122               | 4175              | 8974              | 4167  | 776               |     |
| 2011                     | 77712            | 21329            | 1531             | 6034             | 6763             | 3791             | 205              | 1439             | 1460             | 106               | 56383             | 12161            | 1649             | 914              | 1765              | 10197            | 2670             | 9813              | 290               | 4361              | 7989              | 3781  | 793               |     |
| 2012                     | 76137            | 21157            | 1513             | 5991             | 6687             | 3747             | 197              | 1424             | 1495             | 103               | 54980             | 10209            | 1744             | 969              | 1299              | 10832            | 2840             | 9943              | 373               | 4677              | 7739              | 3563  | 792               |     |
| 2013                     | 74253            | 21143            | 1505             | 5975             | 6653             | 3755             | 188              | 1425             | 1543             | 100               | 53110             | 9809             | 1734             | 964              | 1311              | 10790            | 2837             | 9467              | 166               | 4713              | 7390              | 3161  | 768               |     |
| 2014                     | 72574            | 21118            | 1494             | 5931             | 6614             | 3782             | 177              | 1434             | 1589             | 97                | 51456             | 9797             | 1721             | 956              | 1329              | 10721            | 2829             | 8399              | 117               | 4737              | 7180              | 2925  | 744               |     |
| 2015                     | 71348            | 21071            | 1484             | 5924             | 6571             | 3766             | 171              | 1430             | 1629             | 95                | 50277             | 9609             | 1694             | 941              | 1303              | 10553            | 2798             | 7940              | 113               | 4710              | 7028              | 2858  | 727               |     |
| Central African Republic | 2000             | 25848            | 7093             | 516              | 2286             | 2126             | 912              | 451              | 367              | 347               | 88                | 18755            | 2631             | 233              | 127               | 988              | 1357             | 310               | 2598              | 1634              | 517               | 6141  | 2042              | 178 |
| 2001                     | 25991            | 7147             | 518              | 2317             | 2134             | 929              | 446              | 368              | 347              | 87                | 18844             | 2655             | 235              | 129              | 997               | 1377             | 313              | 2539              | 1496              | 524               | 6388              | 2012  | 180               |     |
| 2002                     | 25886            | 7136             | 514              | 2335             | 2118             | 939              | 435              | 366              | 344              | 86                | 18750             | 2690             | 237              | 131              | 662               | 1406             | 316              | 2489              | 1386              | 534               | 6775              | 1945  | 179               |     |
| 2003                     | 25399            | 7093             | 509              | 2315             | 2103             | 955              | 425              | 361              | 341              | 85                | 18306             | 2631             | 231              | 128              | 649               | 1379             | 309              | 2356              | 1048              | 525               | 7019              | 1852  | 178               |     |
| 2004                     | 25813            | 7057             | 505              | 2275             | 2099             | 985              | 413              | 357              | 339              | 83                | 18756             | 2561             | 225              | 125              | 632               | 1350             | 301              | 2217              | 1708              | 514               | 7214              | 1736  | 173               |     |
| 2005                     | 24731            | 7002             | 501              | 2214             | 2093             | 1023             | 398              | 354              | 338              | 81                | 17729             | 2092             | 218              | 122              | 936               | 1315             | 292              | 2081              | 880               | 503               | 7114              | 1608  | 172               |     |
| 2006                     | 23608            | 6943             | 498              | 2132             | 2092             | 1078             | 371              | 355              | 337              | 79                | 16665             | 2594             | 228              | 128              | 633               | 1385             | 307              | 2095              | 69                | 529               | 7088              | 1436  | 173               |     |
| 2007                     | 23283            | 6913             | 496              | 2050             | 2101             | 1158             | 329              | 363              | 338              | 77                | 16370             | 2711             | 238              | 134              | 654               | 1465             | 322              | 2114              | 110               | 558               | 6597              | 1293  | 174               |     |
| 2008                     | 22918            | 6862             | 492              | 1943             | 2107             | 1270             | 257              | 380              | 339              | 74                | 16056             | 2107             | 247              | 139              | 1022              | 1527             | 334              | 2107              | 152               | 584               | 5768              | 1196  | 175               |     |
| 2009                     | 22337            | 6848             | 488              | 1890             | 2107             | 1346             | 212              | 393              | 340              | 71                | 15489             | 2809             | 276              | 155              | 615               | 1733             | 374              | 2261              | 36                | 662               | 5334              | 1059  | 177               |     |
| 2010                     | 22063            | 6846             | 486              | 1898             | 2099             | 1359             | 200              | 393              | 340              | 70                | 15217             | 2937             | 291              | 164              | 637               | 1850             | 395              | 2294              | 108               | 709               | 4697              | 957   | 177               |     |
| 2011                     | 22614            | 6863             | 488              | 1964             | 2103             | 1290             | 219              | 384              | 344              | 70                | 15751             | 2994             | 306              | 173              | 647               | 1961             | 415              |                   |                   |                   |                   |       |                   |     |

Webappendix 6. Estimated numbers of deaths by cause in neonates, children aged 1-59 months at the global, regional and country levels in 2000-2015

| Year                             | 0-28 days        |                  |                  |                  |                  |                  |                  |                  |                  |                   |                   | 1-59 months      |                  |                  |                   |                  |                  |                   |                   |                   |                   |        |                   |      |     |
|----------------------------------|------------------|------------------|------------------|------------------|------------------|------------------|------------------|------------------|------------------|-------------------|-------------------|------------------|------------------|------------------|-------------------|------------------|------------------|-------------------|-------------------|-------------------|-------------------|--------|-------------------|------|-----|
|                                  | USD <sup>1</sup> | NEO <sup>2</sup> | PNE <sup>3</sup> | PRE <sup>4</sup> | INT <sup>5</sup> | SEP <sup>6</sup> | TET <sup>7</sup> | OTH <sup>8</sup> | CON <sup>9</sup> | DIA <sup>10</sup> | POS <sup>11</sup> | PNE <sup>3</sup> | PRE <sup>4</sup> | INT <sup>5</sup> | MEN <sup>12</sup> | OTH <sup>8</sup> | CON <sup>9</sup> | DIA <sup>10</sup> | MEA <sup>13</sup> | INJ <sup>14</sup> | MAL <sup>15</sup> | AIDS   | PER <sup>16</sup> |      |     |
| Côte d'Ivoire                    | 2012             | 8179             | 3119             | 189              | 1055             | 797              | 489              | 15               | 179              | 382               | 12                | 5060             | 1059             | 150              | 80                | 121              | 949              | 273               | 656               | 156               | 464               | 474    | 517               | 161  |     |
| Côte d'Ivoire                    | 2013             | 7862             | 3063             | 185              | 1032             | 777              | 474              | 14               | 175              | 393               | 12                | 4799             | 863              | 153              | 82                | 79               | 982              | 281               | 639               | 142               | 481               | 462    | 481               | 153  |     |
| Côte d'Ivoire                    | 2014             | 7502             | 3011             | 181              | 1012             | 759              | 461              | 13               | 172              | 402               | 11                | 4491             | 823              | 149              | 80                | 72               | 962              | 277               | 547               | 52                | 476               | 435    | 473               | 145  |     |
| Côte d'Ivoire                    | 2015             | 7269             | 2948             | 176              | 988              | 738              | 448              | 13               | 168              | 407               | 11                | 4321             | 795              | 145              | 78                | 69               | 934              | 270               | 509               | 50                | 467               | 410    | 455               | 140  |     |
| Côte d'Ivoire                    | 2000             | 95582            | 33147            | 2300             | 10422            | 9531             | 5908             | 1230             | 1855             | 1575              | 325               | 62435            | 6998             | 656              | 339               | 1143             | 3843             | 911               | 6424              | 3786              | 1526              | 31481  | 4640              | 687  |     |
| Côte d'Ivoire                    | 2001             | 96063            | 33168            | 2296             | 10382            | 9525             | 6042             | 1136             | 1881             | 1587              | 319               | 62895            | 6907             | 647              | 336               | 1138             | 3810             | 902               | 6118              | 3805              | 1522              | 32349  | 4673              | 689  |     |
| Côte d'Ivoire                    | 2002             | 95546            | 32987            | 2278             | 10357            | 9470             | 6016             | 1071             | 1886             | 1596              | 312               | 62559            | 6756             | 634              | 331               | 1123             | 3729             | 888               | 5769              | 3861              | 1506              | 32646  | 4618              | 698  |     |
| Côte d'Ivoire                    | 2003             | 93652            | 32558            | 2240             | 10295            | 9319             | 5936             | 1009             | 1863             | 1592              | 304               | 61094            | 6611             | 620              | 325               | 1108             | 3656             | 872               | 5435              | 3272              | 1493              | 32482  | 4515              | 705  |     |
| Côte d'Ivoire                    | 2004             | 91142            | 32138            | 2204             | 10227            | 9169             | 5871             | 943              | 1836             | 1592              | 295               | 59004            | 6440             | 604              | 319               | 1659             | 3579             | 855               | 5094              | 2352              | 1475              | 31565  | 4371              | 691  |     |
| Côte d'Ivoire                    | 2005             | 87971            | 31670            | 2154             | 10166            | 8937             | 5894             | 872              | 1780             | 1584              | 284               | 56301            | 6501             | 609              | 323               | 1679             | 3668             | 866               | 4942              | 873               | 1512              | 30535  | 4131              | 664  |     |
| Côte d'Ivoire                    | 2006             | 85464            | 31286            | 2109             | 10025            | 8746             | 6021             | 779              | 1752             | 1582              | 271               | 54178            | 6677             | 627              | 333               | 1721             | 3824             | 895               | 4880              | 57                | 1576              | 28975  | 3965              | 648  |     |
| Côte d'Ivoire                    | 2007             | 83842            | 30916            | 2056             | 9785             | 8531             | 6311             | 662              | 1736             | 1581              | 254               | 52926            | 7070             | 665              | 354               | 1187             | 4106             | 954               | 4964              | 218               | 1696              | 27393  | 3666              | 653  |     |
| Côte d'Ivoire                    | 2008             | 81932            | 30786            | 2024             | 9547             | 8436             | 6614             | 555              | 1763             | 1611              | 236               | 51146            | 7411             | 698              | 372               | 1900             | 4358             | 1004              | 4986              | 364               | 1812              | 24694  | 2890              | 659  |     |
| Côte d'Ivoire                    | 2009             | 80472            | 30766            | 2013             | 9486             | 8408             | 6703             | 503              | 1778             | 1651              | 225               | 49706            | 6850             | 795              | 425               | 973              | 5091             | 1150              | 5451              | 189               | 2095              | 23423  | 2615              | 649  |     |
| Côte d'Ivoire                    | 2010             | 79778            | 30841            | 2017             | 9600             | 8433             | 6595             | 494              | 1774             | 1707              | 221               | 48937            | 7313             | 863              | 462               | 1028             | 5595             | 1251              | 5678              | 466               | 2305              | 20903  | 2415              | 658  |     |
| Côte d'Ivoire                    | 2011             | 79376            | 30917            | 2018             | 9757             | 8463             | 6429             | 497              | 1769             | 1764              | 220               | 48459            | 8625             | 914              | 490               | 1224             | 5888             | 1332              | 5777              | 822               | 2472              | 18137  | 2432              | 755  |     |
| Côte d'Ivoire                    | 2012             | 78010            | 31068            | 2022             | 9899             | 8457             | 6417             | 484              | 1751             | 1822              | 216               | 46942            | 8190             | 968              | 520               | 1763             | 6371             | 1416              | 5874              | 224               | 2653              | 16031  | 2239              | 693  |     |
| Côte d'Ivoire                    | 2013             | 77305            | 31241            | 2026             | 9983             | 8477             | 6431             | 463              | 1758             | 1891              | 212               | 46064            | 8540             | 1008             | 542               | 1497             | 6704             | 1480              | 5868              | 343               | 2803              | 14692  | 1910              | 678  |     |
| Côte d'Ivoire                    | 2014             | 76127            | 31362            | 2023             | 10058            | 8462             | 6457             | 440              | 1755             | 1959              | 207               | 44765            | 8878             | 1019             | 548               | 1602             | 6822             | 1501              | 5687              | 154               | 2873              | 13419  | 1602              | 661  |     |
| Côte d'Ivoire                    | 2015             | 75393            | 31467            | 2023             | 10128            | 8469             | 6431             | 422              | 1765             | 2025              | 203               | 43926            | 8469             | 8919             | 1027              | 552              | 1604             | 6915              | 1517              | 5506              | 152               | 2929   | 12584             | 1572 | 649 |
| Democratic Republic of the Congo | 2000             | 346592           | 83222            | 5758             | 30643            | 25315            | 8905             | 2983             | 4592             | 4254              | 771               | 263370           | 36051            | 2932             | 1725              | 9472             | 22097            | 3631              | 34033             | 37279             | 7432              | 100577 | 5313              | 2827 |     |
| Democratic Republic of the Congo | 2001             | 347414           | 84739            | 5853             | 30971            | 25732            | 9596             | 2841             | 4634             | 4356              | 755               | 262675           | 35048            | 2863             | 1681              | 14219            | 21558            | 3568              | 31798             | 36440             | 7335              | 99925  | 5318              | 2922 |     |
| Democratic Republic of the Congo | 2002             | 359243           | 86510            | 5982             | 30895            | 26322            | 10722            | 2599             | 4762             | 4496              | 733               | 272733           | 34666            | 2846             | 1668              | 14118            | 21528            | 3568              | 30204             | 46181             | 7371              | 102353 | 5297              | 2935 |     |
| Democratic Republic of the Congo | 2003             | 346580           | 88548            | 6095             | 31116            | 26845            | 11885            | 2352             | 4901             | 4645              | 709               | 258032           | 34069            | 2815             | 1647              | 13852            | 21336            | 3561              | 28483             | 31453             | 7367              | 105251 | 5238              | 2959 |     |
| Democratic Republic of the Congo | 2004             | 361888           | 90322            | 6168             | 31463            | 27147            | 12980            | 2140             | 4965             | 4776              | 682               | 271566           | 34097            | 2837             | 1656              | 9031             | 21660            | 3622              | 27348             | 45044             | 7501              | 110738 | 5153              | 2880 |     |
| Democratic Republic of the Congo | 2005             | 349020           | 91602            | 6196             | 31916            | 27255            | 13719            | 1990             | 4970             | 4904              | 652               | 257418           | 32840            | 2750             | 1603              | 13242            | 20983            | 3546              | 25248             | 31846             | 7357              | 110098 | 5030              | 2875 |     |
| Democratic Republic of the Congo | 2006             | 329903           | 91704            | 6156             | 31863            | 27100            | 14192            | 1818             | 4959             | 5002              | 615               | 238199           | 33602            | 2831             | 1656              | 8811             | 21741            | 3699              | 24749             | 14159             | 7671              | 111439 | 4965              | 2876 |     |
| Democratic Republic of the Congo | 2007             | 322918           | 91903            | 6123             | 31559            | 26992            | 14930            | 1599             | 5009             | 5114              | 577               | 231015           | 33785            | 2863             | 1682              | 13484            | 22174            | 3794              | 23855             | 9237              | 7853              | 104595 | 4901              | 2794 |     |
| Democratic Republic of the Congo | 2008             | 315896           | 91993            | 6077             | 31129            | 26871            | 15654            | 1391             | 5098             | 5230              | 542               | 223903           | 35745            | 3043             | 1798              | 14194            | 23770            | 4087              | 24205             | 4681              | 8456              | 96287  | 4774              | 2862 |     |
| Democratic Republic of the Congo | 2009             | 312197           | 92046            | 6052             | 30863            | 26796            | 16019            | 1250             | 5176             | 5376              | 514               | 220151           | 34601            | 3565             | 2122              | 7298             | 28493            | 4857              | 27074             | 3901              | 10043             | 90701  | 4692              | 2804 |     |
| Democratic Republic of the Congo | 2010             | 310210           | 92134            | 6043             | 31187            | 26759            | 15678            | 1230             | 5174             | 5564              | 500               | 218076           | 39054            | 3931             | 2343              | 8560             | 31582            | 5412              | 28491             | 3775              | 11194             | 76229  | 4523              | 2981 |     |
| Democratic Republic of the Congo | 2011             | 331052           | 92409            | 6076             | 31689            | 26831            | 15112            | 1246             | 5167             | 5798              | 490               | 238643           | 41387            | 4370             | 2615              | 8588             | 35678            | 6078              | 30291             | 26594             | 12603             | 63050  | 4533              | 2855 |     |
| Democratic Republic of the Congo | 2012             | 315540           | 92723            | 6083             | 32070            | 26806            | 14884            | 1230             | 5153             | 6019              | 479               | 222817           | 43059            | 4790             | 2876              | 8606             | 39377            | 6740              | 31729             | 12857             | 13965             | 51655  | 4253              | 2911 |     |
| Democratic Republic of the Congo | 2013             | 312817           | 93345            | 6100             | 32231            | 26863            | 15053            | 1163             | 5209             | 6262              | 463               | 219472           | 42774            | 5068             | 3043              | 9644             | 41900            | 7207              | 32036             | 12274             | 14923             | 44054  | 3698              | 2852 |     |
| Democratic Republic of the Congo | 2014             | 308095           | 93669            | 6093             | 32280            | 26797            | 15268            | 1087             | 5235             | 6461              | 448               | 214426           | 40153            | 5419             | 3254              | 7941             | 45012            | 7787              | 32752             | 9679              | 16076             | 40190  | 3345              | 2817 |     |
| Democratic Republic of the Congo | 2015             | 304558           | 94252            | 6108             | 32437            | 26845            | 15377            | 1038             | 5290             | 6722              | 435               | 210306           | 40247            | 5481             | 3291              | 7932             | 45571            | 7959              | 31631             | 9448              | 16408             | 36293  | 3281              | 2763 |     |
| Djibouti                         | 2000             | 2309             | 961              | 64               | 348              | 266              | 90               | 42               | 71               | 62                | 16                | 1348             | 303              | 28               | 14                | 54               | 212              | 37                | 254               | 261               | 79                | 15     | 88                | 4    |     |
| Djibouti                         | 2001             | 2133             | 959              | 64               | 351              | 262              | 94               | 39               | 70               | 63                | 16                | 1174             | 294              | 27               | 14                | 52               | 208              | 36                | 238               | 114               | 78                | 15     | 93                | 4    |     |
| Djibouti                         | 2002             | 2063             | 955              | 63               | 353              | 257              | 101              | 35               | 68               | 64                | 15                | 1108             | 287              | 26               | 14                | 51               | 205              | 36                | 223               | 76                | 77                | 15     | 94                | 4    |     |
| Djibouti                         | 2003             | 2004             | 946              | 62               | 349              | 251              | 108              | 31               | 67               | 65                | 14                | 1058             | 281              | 26               | 13                | 50               | 202              | 35                | 210               | 53                | 76                | 15     | 92                | 4    |     |
| Djibouti                         | 2004             | 2014             | 936              | 60               | 341              | 246              | 117              | 27               | 66               | 66                | 13                | 1078             | 275              | 26               | 13                | 49               | 199              | 35                | 198               | 106               | 75                | 8      | 89                | 4    |     |
| Djibouti                         | 2005             | 2203             | 922              | 59               | 329              | 241              | 125              | 23               | 66               | 66                | 12                | 1281             | 267              | 25               | 13                | 47               | 194              | 35                | 185               | 344               | 74                | 7      | 87                | 4    |     |
| Djibouti                         | 2006             | 1864             | 899              | 57               | 313              | 235              | 130              | 20               | 66               | 67                | 11                | 965              | 259              | 24               | 13                | 45               | 190              | 34                | 173               | 63                | 73                | 5      | 81                | 4    |     |
| Djibouti                         | 2007             | 1769             | 871              | 55               | 298              | 228              | 131              | 18               | 64               | 67                | 10                | 898              | 239              | 24               | 13                | 40               | 190              | 35                | 165               | 38                | 73                | 3      | 75                | 4    |     |
| Djibouti                         | 2008             | 1828             | 843              | 53               | 287              | 221              | 128              | 16               | 62               | 68                | 9                 | 985              | 209              | 25               | 13                | 28               | 197              | 36                | 164               | 168               | 76                | 2      | 70                | 4    |     |
| Djibouti                         | 2009             | 1652             | 816              | 51               | 279              | 213              | 123              | 15               | 60               | 68                | 8                 | 836              | 193              | 24               | 13                | 26               | 189              | 35                | 150               | 59                | 74                | 1      | 67                | 4    |     |
| Djibouti                         | 2010             | 1564             | 795              | 49               | 273              | 206              | 119              | 13               | 59               | 68                | 8                 | 769              | 186              | 24               | 12                | 25               | 183              | 34                | 139               | 24                | 72                | 1      | 64                | 4    |     |
| Djibouti                         | 2011             | 1564             | 782              | 48               | 269              | 202              | 116              | 12               | 58               | 69                | 7                 | 782              | 182              | 23               | 12                | 25               | 179              | 34                | 131               | 62                | 71                | 2      | 57                | 4    |     |
| Djibouti                         | 2012             | 1646             | 772              | 48               | 267              | 199              | 113              | 11               | 57               | 71                | 7                 | 874              | 184              | 23               | 12                | 25               | 179              | 34                | 125               | 174               | 71                | 4      | 40                | 4    |     |
| Djibouti                         | 2013             | 1480             | 766              | 47               | 266              | 196              | 110              | 11               | 56               | 72                | 7                 | 714              | 145              | 24               | 13                | 15               | 189              | 36                | 127               | 33                | 76                | 7      | 45                | 4    |     |
| Djibouti                         | 2014             | 1469             | 752              | 46               | 262              | 192              | 107              | 10               | 55               | 73                | 6                 | 717              | 145              | 24               | 12                | 16               | 185              | 36                | 118               | 53                | 74                | 4      | 47                | 4    |     |
| Djibouti                         | 2015             | 1429             | 737              | 45               | 258              | 187              | 104              | 9                | 54               | 74                | 6                 | 692              | 140              | 23               | 12                | 15               | 180              | 35                | 110               | 51                | 73                | 4      | 45                | 4    |     |
| Equatorial Guinea                | 2000             | 3197             | 920              | 66               | 292              | 275              | 111              | 37               | 73               | 47                | 20                | 2277             | 421              | 43               | 22                | 45               | 256              | 69                | 390               | 274               | 90                | 607    | 38                | 23   |     |
| Equatorial Guinea                | 2001             | 2992             | 921              | 65               | 300              | 275              | 105              | 36               | 73               | 47                | 19                | 2071             | 404              | 42               | 21                | 41               | 246              | 68                | 360               | 99                | 87                | 632    | 49                | 24   |     |
| Equatorial Guinea                | 2002             | 3068             | 922              | 65</             |                  |                  |                  |                  |                  |                   |                   |                  |                  |                  |                   |                  |                  |                   |                   |                   |                   |        |                   |      |     |



Webappendix 6. Estimated numbers of deaths by cause in neonates, children aged 1-59 months at the global, regional and country levels in 2000-2015

| Year   | 0-28 days        |                  |                  |                  |                  |                  |                  |                  |                  |                   | 1-59 months       |                  |                  |                  |                   |                  |                  |                   |                   |                   |                   |       |                   |     |
|--------|------------------|------------------|------------------|------------------|------------------|------------------|------------------|------------------|------------------|-------------------|-------------------|------------------|------------------|------------------|-------------------|------------------|------------------|-------------------|-------------------|-------------------|-------------------|-------|-------------------|-----|
|        | USD <sup>1</sup> | NEO <sup>2</sup> | PNE <sup>3</sup> | PRE <sup>4</sup> | INT <sup>5</sup> | SEP <sup>6</sup> | TET <sup>7</sup> | OTH <sup>8</sup> | CON <sup>9</sup> | DIA <sup>10</sup> | POS <sup>11</sup> | PNE <sup>3</sup> | PRE <sup>4</sup> | INT <sup>5</sup> | MEN <sup>12</sup> | OTH <sup>8</sup> | CON <sup>9</sup> | DIA <sup>10</sup> | MEA <sup>13</sup> | INJ <sup>14</sup> | MAL <sup>15</sup> | AIDS  | PER <sup>16</sup> |     |
| Gambia | 2007             | 3114             | 1207             | 78               | 457              | 314              | 160              | 13               | 65               | 113               | 7                 | 1907             | 373              | 45               | 22                | 38               | 246              | 92                | 231               | 169               | 112               | 95    | 436               | 49  |
| Gambia | 2008             | 2947             | 1222             | 78               | 455              | 317              | 167              | 12               | 67               | 119               | 7                 | 1725             | 370              | 45               | 22                | 38               | 243              | 93                | 220               | 38                | 113               | 93    | 401               | 50  |
| Gambia | 2009             | 2948             | 1228             | 77               | 451              | 317              | 172              | 11               | 69               | 124               | 6                 | 1720             | 369              | 45               | 22                | 37               | 241              | 94                | 210               | 70                | 115               | 96    | 368               | 52  |
| Gambia | 2010             | 2953             | 1235             | 77               | 451              | 317              | 175              | 10               | 69               | 129               | 6                 | 1718             | 318              | 48               | 24                | 27               | 252              | 100               | 212               | 118               | 122               | 110   | 332               | 56  |
| Gambia | 2011             | 2945             | 1233             | 76               | 447              | 315              | 177              | 10               | 69               | 134               | 6                 | 1712             | 311              | 48               | 24                | 26               | 254              | 101               | 204               | 154               | 124               | 122   | 290               | 55  |
| Gambia | 2012             | 2911             | 1228             | 75               | 440              | 311              | 179              | 9                | 69               | 138               | 6                 | 1683             | 300              | 47               | 23                | 24               | 251              | 101               | 192               | 188               | 124               | 136   | 242               | 54  |
| Gambia | 2013             | 2697             | 1223             | 74               | 430              | 309              | 183              | 8                | 70               | 143               | 6                 | 1474             | 309              | 46               | 23                | 24               | 247              | 99                | 180               | 57                | 123               | 146   | 183               | 51  |
| Gambia | 2014             | 2630             | 1218             | 74               | 423              | 306              | 184              | 7                | 71               | 148               | 5                 | 1412             | 291              | 45               | 22                | 24               | 238              | 96                | 165               | 72                | 120               | 150   | 142               | 48  |
| Gambia | 2015             | 2579             | 1195             | 72               | 413              | 299              | 181              | 7                | 70               | 148               | 5                 | 1384             | 283              | 44               | 22                | 23               | 232              | 95                | 155               | 71                | 118               | 155   | 139               | 47  |
| Gambia | 2000             | 6327             | 2260             | 150              | 585              | 672              | 551              | 30               | 138              | 124               | 10                | 4067             | 851              | 106              | 53                | 148              | 647              | 147               | 940               | 272               | 268               | 478   | 106               | 52  |
| Gambia | 2001             | 6166             | 2253             | 149              | 584              | 668              | 548              | 28               | 139              | 127               | 10                | 3913             | 846              | 105              | 52                | 224              | 642              | 148               | 888               | 139               | 269               | 427   | 124               | 50  |
| Gambia | 2002             | 6066             | 2274             | 150              | 587              | 673              | 554              | 26               | 142              | 132               | 10                | 3792             | 855              | 108              | 54                | 149              | 657              | 153               | 869               | 85                | 279               | 389   | 141               | 53  |
| Gambia | 2003             | 6026             | 2291             | 151              | 593              | 676              | 555              | 25               | 144              | 138               | 9                 | 3735             | 846              | 108              | 54                | 147              | 660              | 156               | 832               | 97                | 284               | 342   | 156               | 53  |
| Gambia | 2004             | 5877             | 2315             | 152              | 601              | 682              | 557              | 24               | 146              | 144               | 9                 | 3562             | 836              | 109              | 54                | 144              | 659              | 158               | 795               | 3                 | 287               | 293   | 170               | 55  |
| Gambia | 2005             | 5837             | 2314             | 152              | 605              | 680              | 550              | 24               | 145              | 150               | 9                 | 3523             | 828              | 109              | 54                | 142              | 663              | 160               | 762               | 15                | 293               | 260   | 182               | 55  |
| Gambia | 2006             | 5800             | 2307             | 151              | 605              | 677              | 542              | 22               | 145              | 155               | 9                 | 3493             | 826              | 109              | 55                | 142              | 663              | 162               | 730               | 26                | 297               | 236   | 191               | 57  |
| Gambia | 2007             | 5754             | 2312             | 151              | 609              | 679              | 535              | 22               | 146              | 162               | 9                 | 3442             | 818              | 109              | 55                | 141              | 657              | 164               | 692               | 35                | 298               | 218   | 198               | 58  |
| Gambia | 2008             | 5697             | 2330             | 152              | 615              | 684              | 532              | 21               | 148              | 169               | 9                 | 3367             | 804              | 108              | 55                | 137              | 656              | 165               | 662               | 16                | 301               | 207   | 197               | 59  |
| Gambia | 2009             | 5671             | 2351             | 154              | 623              | 689              | 528              | 20               | 150              | 177               | 9                 | 3320             | 794              | 108              | 55                | 134              | 655              | 166               | 632               | 25                | 304               | 197   | 187               | 60  |
| Gambia | 2010             | 5658             | 2374             | 155              | 629              | 695              | 529              | 20               | 152              | 185               | 9                 | 3284             | 684              | 117              | 59                | 103              | 708              | 181               | 652               | 34                | 331               | 205   | 148               | 63  |
| Gambia | 2011             | 5646             | 2411             | 157              | 644              | 702              | 532              | 20               | 152              | 195               | 9                 | 3235             | 653              | 118              | 60                | 95               | 715              | 183               | 632               | 41                | 338               | 202   | 133               | 66  |
| Gambia | 2012             | 5616             | 2443             | 157              | 663              | 705              | 535              | 21               | 151              | 202               | 9                 | 3173             | 606              | 119              | 61                | 121              | 728              | 188               | 615               | 12                | 346               | 201   | 109               | 67  |
| Gambia | 2013             | 5610             | 2464             | 158              | 683              | 705              | 529              | 22               | 147              | 210               | 9                 | 3146             | 612              | 120              | 62                | 83               | 735              | 191               | 588               | 17                | 351               | 199   | 122               | 66  |
| Gambia | 2014             | 5573             | 2477             | 159              | 696              | 704              | 525              | 22               | 145              | 218               | 9                 | 3096             | 616              | 122              | 62                | 85               | 746              | 194               | 499               | 12                | 358               | 199   | 137               | 65  |
| Gambia | 2015             | 5540             | 2471             | 158              | 701              | 699              | 517              | 21               | 143              | 224               | 9                 | 3069             | 612              | 121              | 62                | 84               | 746              | 196               | 478               | 12                | 360               | 197   | 135               | 65  |
| Ghana  | 2000             | 66835            | 22698            | 1602             | 6868             | 6691             | 4248             | 429              | 1264             | 1436              | 160               | 44137            | 6345             | 564              | 342               | 1146             | 3362             | 837               | 5019              | 7476              | 1660              | 14563 | 2193              | 629 |
| Ghana  | 2001             | 63946            | 22794            | 1600             | 6960             | 6665             | 4245             | 404              | 1279             | 1479              | 161               | 41152            | 6532             | 582              | 359               | 1172             | 3460             | 882               | 4966              | 4869              | 1736              | 13683 | 2239              | 672 |
| Ghana  | 2002             | 63284            | 22974            | 1607             | 7034             | 6697             | 4254             | 380              | 1305             | 1536              | 161               | 40310            | 6697             | 640              | 402               | 881              | 3864             | 990               | 5230              | 4105              | 1928              | 13529 | 2263              | 691 |
| Ghana  | 2003             | 59528            | 23424            | 1630             | 7095             | 6831             | 4386             | 355              | 1353             | 1617              | 157               | 36104            | 5942             | 661              | 422               | 1367             | 4010             | 1050              | 5176              | 61                | 2009              | 12433 | 2265              | 707 |
| Ghana  | 2004             | 60033            | 23839            | 1644             | 7074             | 6969             | 4573             | 328              | 1405             | 1700              | 147               | 36194            | 6212             | 694              | 451               | 1422             | 4250             | 1130              | 5226              | 247               | 2131              | 11458 | 2244              | 728 |
| Ghana  | 2005             | 60544            | 24295            | 1660             | 7038             | 7108             | 4808             | 304              | 1459             | 1780              | 138               | 36249            | 6375             | 726              | 481               | 1435             | 4465             | 1214              | 5246              | 460               | 2241              | 10667 | 2197              | 743 |
| Ghana  | 2006             | 60750            | 24642            | 1669             | 7039             | 7201             | 4961             | 288              | 1502             | 1850              | 132               | 36108            | 6603             | 765              | 504               | 973              | 4690             | 1304              | 5258              | 567               | 2352              | 10203 | 2132              | 755 |
| Ghana  | 2007             | 60026            | 24815            | 1669             | 7081             | 7210             | 5022             | 276              | 1522             | 1906              | 129               | 35211            | 6488             | 785              | 516               | 923              | 4828             | 1363              | 5140              | 192               | 2409              | 9932  | 1906              | 729 |
| Ghana  | 2008             | 59528            | 24950            | 1668             | 7176             | 7196             | 5017             | 269              | 1532             | 1962              | 129               | 34578            | 6331             | 772              | 506               | 1354             | 4701             | 1361              | 4816              | 337               | 2368              | 9610  | 1684              | 737 |
| Ghana  | 2009             | 58792            | 25063            | 1665             | 7257             | 7184             | 4999             | 262              | 1542             | 2027              | 127               | 33729            | 6223             | 771              | 504               | 866              | 4667             | 1383              | 4578              | 377               | 2367              | 9621  | 1633              | 739 |
| Ghana  | 2010             | 58117            | 25203            | 1665             | 7305             | 7197             | 4995             | 253              | 1556             | 2108              | 124               | 32914            | 6098             | 763              | 496               | 836              | 4585             | 1383              | 4317              | 476               | 2353              | 9389  | 1477              | 741 |
| Ghana  | 2011             | 57262            | 25373            | 1664             | 7338             | 7229             | 5006             | 241              | 1573             | 2204              | 119               | 31889            | 6192             | 778              | 503               | 843              | 4649             | 1431              | 4183              | 206               | 2406              | 8873  | 1074              | 752 |
| Ghana  | 2012             | 57080            | 25617            | 1669             | 7406             | 7273             | 5027             | 230              | 1589             | 2309              | 114               | 31463            | 5672             | 832              | 536               | 1067             | 4993             | 1553              | 3965              | 455               | 2583              | 8271  | 778               | 759 |
| Ghana  | 2013             | 56434            | 25721            | 1663             | 7448             | 7262             | 5021             | 219              | 1595             | 2403              | 110               | 30713            | 5145             | 898              | 578               | 698              | 565              | 1702              | 3842              | 373               | 2800              | 7732  | 767               | 742 |
| Ghana  | 2014             | 55364            | 25709            | 1650             | 7481             | 7206             | 4990             | 208              | 1586             | 2480              | 107               | 29655            | 4922             | 930              | 599               | 612              | 5434             | 1793              | 3730              | 122               | 2914              | 6968  | 689               | 722 |
| Ghana  | 2015             | 54061            | 25402            | 1617             | 7434             | 7062             | 4902             | 196              | 1560             | 2528              | 103               | 28659            | 4861             | 931              | 600               | 603              | 5658             | 1823              | 3559              | 117               | 2928              | 6216  | 666               | 698 |
| Guinea | 2000             | 66725            | 17419            | 1243             | 4654             | 5323             | 3666             | 554              | 964              | 862               | 153               | 49306            | 7508             | 544              | 482               | 1620             | 3945             | 879               | 7207              | 9760              | 1499              | 14342 | 1084              | 435 |
| Guinea | 2001             | 63983            | 16737            | 1195             | 4497             | 5099             | 3595             | 443              | 944              | 819               | 144               | 47246            | 7490             | 544              | 482               | 1612             | 3960             | 882               | 6850              | 8307              | 1534              | 14061 | 1089              | 435 |
| Guinea | 2002             | 57874            | 16290            | 1163             | 4377             | 4960             | 3549             | 371              | 937              | 797               | 135               | 41584            | 7422             | 541              | 480               | 1597             | 3946             | 884               | 6468              | 3680              | 1559              | 13494 | 1080              | 433 |
| Guinea | 2003             | 55593            | 16018            | 1140             | 4271             | 4883             | 3551             | 314              | 942              | 791               | 126               | 39575            | 7344             | 536              | 477               | 1586             | 3930             | 882               | 6100              | 2905              | 1581              | 12737 | 1066              | 433 |
| Guinea | 2004             | 51412            | 15780            | 1118             | 4125             | 4839             | 3570             | 265              | 953              | 795               | 115               | 35632            | 7326             | 536              | 477               | 1589             | 3946             | 887               | 5806              | 62                | 1615              | 11911 | 1048              | 428 |
| Guinea | 2005             | 50643            | 15577            | 1096             | 3976             | 4801             | 3610             | 220              | 966              | 804               | 104               | 35066            | 7317             | 537              | 479               | 1594             | 3960             | 893               | 5537              | 456               | 1650              | 11180 | 1030              | 434 |
| Guinea | 2006             | 49689            | 15150            | 1054             | 3797             | 4672             | 3597             | 177              | 960              | 800               | 93                | 34539            | 7311             | 538              | 480               | 1600             | 3980             | 901               | 5289              | 701               | 1684              | 10611 | 1004              | 440 |
| Guinea | 2007             | 47981            | 14689            | 1010             | 3646             | 4508             | 3567             | 145              | 938              | 793               | 82                | 33292            | 7290             | 538              | 480               | 1598             | 3997             | 906               | 5042              | 154               | 1715              | 10198 | 936               | 438 |
| Guinea | 2008             | 47349            | 14418            | 978              | 3589             | 4381             | 3561             | 128              | 912              | 793               | 75                | 32931            | 7009             | 519              | 464               | 2353             | 3834             | 879               | 4640              | 527               | 1682              | 9664  | 903               | 458 |
| Guinea | 2009             | 46801            | 14250            | 958              | 3611             | 4287             | 3519             | 124              | 878              | 802               | 71                | 32551            | 6332             | 547              | 490               | 1258             | 4082             | 931               | 4678              | 893               | 1805              | 10157 | 912               | 466 |
| Guinea | 2010             | 45310            | 14261            | 960              | 3706             | 4284             | 3424             | 133              | 857              | 828               | 70                | 31049            | 6101             | 539              | 483               | 1192             | 4031             | 921               | 4406              | 173               | 1808              | 10035 | 901               | 461 |
| Guinea | 2011             | 44874            | 14261            | 966              | 3806             | 4311             | 3252             | 146              | 846              | 863               | 70                | 30613            | 5993             | 529              | 474               | 1170             | 3953             | 907               | 4137              | 461               | 1803              | 9873  | 840               | 473 |
| Guinea | 2012             | 44514            | 14280            | 973              | 3871             | 4356             | 3101             | 154              | 855              | 901               | 69                | 30234            | 5933             | 525              | 471               | 1154             | 3929             | 905               | 3935              | 651               | 1815              | 9623  | 811               | 481 |
| Guinea | 2013             | 43437            | 14337            | 978              | 3914             | 4388             | 3032             | 154              | 864              | 939               | 68                | 29100            | 5953             | 528              | 474               | 1154             | 3985             | 915               | 3793              | 154               | 1851              | 9396  | 428               | 470 |
| Guinea | 2014             | 42802            | 14270            | 970              | 3907             | 4359             | 2994             | 146              | 864              | 965               | 65                | 28532            | 6111             | 526              | 472               | 1212             | 3988             | 914               | 3618              | 155               | 1867              | 8991  | 219               | 461 |
| Guinea | 2015             | 42073            |                  |                  |                  |                  |                  |                  |                  |                   |                   |                  |                  |                  |                   |                  |                  |                   |                   |                   |                   |       |                   |     |

Webappendix 6. Estimated numbers of deaths by cause in neonates, children aged 1-59 months at the global, regional and country levels in 2000-2015

| Year | 0-28 days        |                  |                  |                  |                  |                  |                  |                  |                  |                   | 1-59 months       |                  |                  |                  |                   |                  |                  |                   |                   |                   |                   |       |                   |
|------|------------------|------------------|------------------|------------------|------------------|------------------|------------------|------------------|------------------|-------------------|-------------------|------------------|------------------|------------------|-------------------|------------------|------------------|-------------------|-------------------|-------------------|-------------------|-------|-------------------|
|      | USD <sup>1</sup> | NEO <sup>2</sup> | PNE <sup>3</sup> | PRE <sup>4</sup> | INT <sup>5</sup> | SEP <sup>6</sup> | TET <sup>7</sup> | OTH <sup>8</sup> | CON <sup>9</sup> | DIA <sup>10</sup> | POS <sup>11</sup> | PNE <sup>3</sup> | PRE <sup>4</sup> | INT <sup>5</sup> | MEN <sup>12</sup> | OTH <sup>8</sup> | CON <sup>9</sup> | DIA <sup>10</sup> | MEA <sup>13</sup> | INJ <sup>14</sup> | MAL <sup>15</sup> | AIDS  | PER <sup>16</sup> |
| 2002 | 19922            | 5062             | 355              | 1640             | 1512             | 845              | 140              | 271              | 245              | 54                | 14860             | 2396             | 216              | 120              | 732               | 1371             | 300              | 2161              | 912               | 500               | 5593              | 397   | 161               |
| 2003 | 18353            | 4812             | 337              | 1565             | 1443             | 802              | 120              | 261              | 238              | 46                | 13541             | 2293             | 207              | 116              | 715               | 1316             | 289              | 1942              | 684               | 499               | 4922              | 400   | 159               |
| 2004 | 16878            | 4587             | 319              | 1489             | 1373             | 779              | 101              | 251              | 235              | 39                | 12291             | 2216             | 200              | 112              | 684               | 1271             | 283              | 1763              | 488               | 503               | 4210              | 397   | 163               |
| 2005 | 15428            | 4420             | 306              | 1411             | 1315             | 792              | 82               | 243              | 237              | 34                | 11008             | 2191             | 199              | 112              | 660               | 1276             | 282              | 1641              | 7                 | 518               | 3580              | 391   | 152               |
| 2006 | 14734            | 4270             | 292              | 1312             | 1263             | 831              | 60               | 242              | 241              | 29                | 10464             | 2182             | 198              | 112              | 638               | 1276             | 285              | 1542              | 134               | 535               | 3025              | 380   | 156               |
| 2007 | 14176            | 4161             | 281              | 1224             | 1221             | 877              | 42               | 246              | 247              | 24                | 10015             | 2195             | 201              | 114              | 620               | 1293             | 291              | 1468              | 184               | 557               | 2569              | 365   | 157               |
| 2008 | 13545            | 4090             | 272              | 1170             | 1191             | 897              | 32               | 251              | 256              | 21                | 9455              | 1973             | 216              | 123              | 459               | 1410             | 317              | 1492              | 29                | 615               | 2337              | 330   | 155               |
| 2009 | 13125            | 4011             | 264              | 1137             | 1159             | 891              | 27               | 249              | 265              | 19                | 9114              | 1967             | 217              | 124              | 447               | 1421             | 322              | 1417              | 81                | 632               | 2039              | 297   | 152               |
| 2010 | 13748            | 3938             | 256              | 1118             | 1131             | 869              | 25               | 246              | 275              | 17                | 9810              | 1987             | 210              | 120              | 466               | 1366             | 314              | 1300              | 1202              | 624               | 1803              | 258   | 159               |
| 2011 | 12846            | 3893             | 251              | 1109             | 1107             | 861              | 23               | 241              | 285              | 16                | 8953              | 1813             | 210              | 121              | 379               | 1371             | 317              | 1237              | 750               | 637               | 1739              | 221   | 159               |
| 2012 | 11770            | 3821             | 243              | 1093             | 1074             | 847              | 22               | 234              | 292              | 15                | 7949              | 1741             | 204              | 118              | 357               | 1334             | 311              | 1147              | 123               | 631               | 1647              | 178   | 159               |
| 2013 | 11328            | 3749             | 236              | 1076             | 1041             | 836              | 20               | 227              | 299              | 15                | 7579              | 1675             | 195              | 113              | 347               | 1279             | 300              | 1043              | 156               | 612               | 1554              | 155   | 151               |
| 2014 | 10842            | 3692             | 231              | 1063             | 1017             | 821              | 19               | 222              | 306              | 14                | 7150              | 1547             | 192              | 111              | 323               | 1268             | 299              | 982               | 76                | 612               | 1463              | 134   | 143               |
| 2015 | 10509            | 3644             | 226              | 1053             | 995              | 808              | 18               | 218              | 313              | 13                | 6865              | 1513             | 190              | 109              | 316               | 1254             | 297              | 924               | 73                | 609               | 1314              | 128   | 138               |
| 2000 | 71115            | 20421            | 1561             | 6530             | 6433             | 2846             | 439              | 1158             | 1280             | 174               | 50694             | 14435            | 1363             | 436              | 2941              | 8025             | 1323             | 11336             | 4055              | 3639              | 1885              | 413   | 844               |
| 2001 | 67654            | 19945            | 1520             | 6297             | 6268             | 2854             | 389              | 1141             | 1313             | 163               | 47709             | 13943            | 1316             | 424              | 2851              | 7736             | 1282             | 10420             | 2983              | 3610              | 1872              | 424   | 848               |
| 2002 | 64916            | 19347            | 1464             | 6085             | 6020             | 2841             | 342              | 1106             | 1333             | 156               | 45569             | 13177            | 1242             | 404              | 2715              | 7295             | 1214             | 9372              | 3093              | 3503              | 2288              | 428   | 838               |
| 2003 | 64317            | 18687            | 1400             | 5869             | 5722             | 2846             | 299              | 1058             | 1344             | 149               | 45630             | 12019            | 1136             | 370              | 2488              | 6630             | 1116             | 8136              | 5567              | 3281              | 3663              | 428   | 798               |
| 2004 | 58469            | 18109            | 1342             | 5660             | 5439             | 2895             | 259              | 1011             | 1361             | 142               | 40360             | 11839            | 1119             | 369              | 2454              | 6533             | 1109             | 7626              | 2816              | 3319              | 1959              | 421   | 795               |
| 2005 | 52852            | 17599            | 1288             | 5432             | 5199             | 2961             | 223              | 976              | 1386             | 134               | 35253             | 11326            | 1071             | 358              | 2341              | 6245             | 1071             | 6951              | 14                | 3259              | 1431              | 412   | 775               |
| 2006 | 50260            | 17234            | 1246             | 5213             | 5046             | 3009             | 194              | 963              | 1438             | 125               | 33026             | 10707            | 1016             | 340              | 2198              | 5876             | 1023             | 6259              | 137               | 3164              | 1143              | 398   | 766               |
| 2007 | 48077            | 16916            | 1213             | 5014             | 4950             | 2985             | 171              | 964              | 1503             | 116               | 31161             | 10303            | 979              | 331              | 2105              | 5627             | 996              | 5747              | 207               | 3119              | 589               | 383   | 775               |
| 2008 | 46093            | 16631            | 1186             | 4833             | 4894             | 2903             | 153              | 978              | 1576             | 108               | 29462             | 9095             | 1014             | 344              | 1650              | 5802             | 1039             | 5666              | 98                | 3289              | 287               | 367   | 812               |
| 2009 | 44848            | 16427            | 1166             | 4709             | 4848             | 2828             | 141              | 989              | 1643             | 103               | 28421             | 8298             | 1009             | 339              | 1394              | 5753             | 1038             | 5369              | 258               | 3314              | 499               | 350   | 799               |
| 2010 | 43773            | 16363            | 1155             | 4643             | 4823             | 2798             | 132              | 999              | 1713             | 99                | 27410             | 8077             | 968              | 325              | 1391              | 5477             | 1003             | 4924              | 356               | 3222              | 536               | 335   | 797               |
| 2011 | 42709            | 16283            | 1142             | 4587             | 4777             | 2790             | 124              | 999              | 1766             | 96                | 26426             | 7784             | 943              | 316              | 1339              | 5307             | 982              | 4598              | 153               | 3174              | 728               | 312   | 790               |
| 2012 | 42125            | 16199            | 1129             | 4539             | 4734             | 2768             | 117              | 1000             | 1818             | 94                | 25926             | 7502             | 904              | 303              | 1310              | 5033             | 947              | 4226              | 322               | 3073              | 1217              | 293   | 798               |
| 2013 | 41574            | 16105            | 1117             | 4497             | 4688             | 2737             | 112              | 998              | 1865             | 93                | 25469             | 6153             | 986              | 331              | 875               | 5562             | 1040             | 4424              | 422               | 3383              | 1232              | 279   | 784               |
| 2014 | 40700            | 16155            | 1115             | 4501             | 4684             | 2726             | 108              | 1004             | 1925             | 92                | 24545             | 6082             | 962              | 323              | 885               | 5422             | 1021             | 3848              | 117               | 3326              | 1537              | 268   | 754               |
| 2015 | 40075            | 16189            | 1111             | 4503             | 4670             | 2721             | 105              | 1005             | 1983             | 91                | 23886             | 5854             | 930              | 312              | 853               | 5233             | 994              | 3573              | 114               | 3242              | 1797              | 261   | 724               |
| 2000 | 82502            | 16982            | 1182             | 5227             | 4983             | 3221             | 216              | 1182             | 825              | 147               | 65520             | 12205            | 973              | 749              | 3221              | 7595             | 1554             | 11315             | 130               | 2402              | 12965             | 11959 | 454               |
| 2001 | 77767            | 16245            | 1126             | 5045             | 4773             | 3071             | 181              | 1142             | 782              | 124               | 61522             | 11540            | 926              | 713              | 3056              | 7289             | 1497             | 10033             | 245               | 2373              | 11409             | 11998 | 443               |
| 2002 | 71959            | 15461            | 1061             | 4827             | 4535             | 2933             | 151              | 1097             | 756              | 103               | 56498             | 9468             | 912              | 702              | 2125              | 7177             | 1493             | 9160              | 439               | 2439              | 10155             | 11929 | 499               |
| 2003 | 66369            | 14799            | 1002             | 4639             | 4294             | 2864             | 128              | 1038             | 748              | 87                | 51570             | 8315             | 858              | 662              | 1738              | 6790             | 1426             | 7988              | 607               | 2388              | 8520              | 11797 | 480               |
| 2004 | 61997            | 14333            | 955              | 4515             | 4106             | 2821             | 113              | 989              | 759              | 76                | 47664             | 7611             | 806              | 622              | 1559              | 6384             | 1361             | 6988              | 756               | 2319              | 7155              | 11618 | 484               |
| 2005 | 59020            | 14206            | 933              | 4490             | 4019             | 2836             | 103              | 966              | 789              | 69                | 44814             | 7059             | 766              | 590              | 1419              | 6049             | 1312             | 6208              | 877               | 2256              | 6415              | 11370 | 496               |
| 2006 | 57239            | 14250            | 927              | 4525             | 4000             | 2847             | 98               | 959              | 829              | 65                | 42989             | 6785             | 756              | 584              | 1319              | 5985             | 1319             | 5782              | 174               | 2268              | 6494              | 11020 | 503               |
| 2007 | 56314            | 14583            | 940              | 4664             | 4066             | 2893             | 98               | 973              | 885              | 65                | 41731             | 6696             | 723              | 561              | 1362              | 5688             | 1283             | 5246              | 302               | 2202              | 6699              | 10421 | 548               |
| 2008 | 55401            | 14990            | 958              | 4833             | 4138             | 2965             | 98               | 983              | 950              | 65                | 40411             | 6436             | 711              | 551              | 1276              | 5569             | 1283             | 4869              | 422               | 2187              | 7085              | 9457  | 565               |
| 2009 | 54458            | 15296            | 969              | 4971             | 4177             | 3018             | 97               | 987              | 1011             | 65                | 39162             | 6368             | 714              | 554              | 1243              | 5585             | 1310             | 4631              | 84                | 2223              | 7228              | 8638  | 584               |
| 2010 | 53219            | 15383            | 966              | 5032             | 4146             | 3042             | 93               | 978              | 1062             | 64                | 37836             | 6078             | 688              | 536              | 1182              | 5362             | 1286             | 4232              | 1317              | 2170              | 6290              | 8096  | 599               |
| 2011 | 50363            | 15092            | 937              | 4942             | 4017             | 2991             | 85               | 943              | 1116             | 61                | 35271             | 6226             | 721              | 564              | 1186              | 5668             | 1369             | 4175              | 262               | 2329              | 5445              | 6734  | 593               |
| 2012 | 46621            | 14655            | 901              | 4783             | 3854             | 2906             | 76               | 898              | 1179             | 57                | 31966             | 4733             | 789              | 618              | 574               | 6264             | 1524             | 4231              | 365               | 2617              | 4670              | 4997  | 584               |
| 2013 | 43405            | 14252            | 869              | 4639             | 3713             | 2807             | 69               | 862              | 1240             | 53                | 29153             | 4858             | 770              | 603              | 683               | 6140             | 1512             | 3471              | 484               | 2610              | 3682              | 3808  | 533               |
| 2014 | 41189            | 13885            | 840              | 4517             | 3586             | 2710             | 64               | 833              | 1285             | 50                | 27304             | 4719             | 758              | 593              | 658               | 6052             | 1512             | 3217              | 446               | 2604              | 3117              | 3130  | 499               |
| 2015 | 40048            | 13720            | 825              | 4474             | 3517             | 2651             | 60               | 819              | 1325             | 49                | 26328             | 4596             | 747              | 584              | 640               | 5956             | 1514             | 3014              | 427               | 2582              | 2767              | 3018  | 481               |
| 2000 | 110885           | 28796            | 1991             | 9234             | 7556             | 4475             | 2365             | 1283             | 1604             | 288               | 82089             | 15839            | 1328             | 721              | 3312              | 8192             | 1602             | 17214             | 3414              | 2696              | 25927             | 1269  | 575               |
| 2001 | 113269           | 28297            | 1984             | 9094             | 7535             | 4625             | 1989             | 1294             | 1485             | 290               | 84972             | 15838            | 1333             | 724              | 3281              | 8244             | 1619             | 16410             | 6875              | 2766              | 26068             | 1238  | 576               |
| 2002 | 104591           | 27991            | 1991             | 8854             | 7607             | 4879             | 1649             | 1326             | 1401             | 285               | 76600             | 15560            | 1315             | 714              | 3200              | 8137             | 1608             | 15323             | 71                | 2799              | 26092             | 1209  | 571               |
| 2003 | 102753           | 27927            | 2006             | 8585             | 7767             | 5220             | 1342             | 1383             | 1350             | 273               | 74826             | 14820            | 1259             | 682              | 4635              | 7763             | 1549             | 13842             | 609               | 2753              | 25154             | 1179  | 582               |
| 2004 | 100526           | 28050            | 2025             | 8239             | 7977             | 5749             | 1003             | 1475             | 1330             | 252               | 72476             | 14476            | 1236             | 669              | 4508              | 7621             | 1534             | 12812             | 897               | 2780              | 24210             | 1152  | 581               |
| 2005 | 97344            | 28110            | 2024             | 7970             | 8089             | 6158             | 777              | 1546             | 1313             | 233               | 69234             | 14339            | 1240             | 672              | 4426              | 7663             | 1553             | 12113             | 126               | 2869              | 22535             | 1129  | 571               |
| 2006 | 95872            | 28205            | 2017             | 7806             | 8153             | 6467             | 634              | 1601             | 1309             | 218               | 67667             | 14367            | 1288             | 702              | 4319              | 8003             | 1628             | 11917             | 468               | 3066              | 20232             | 1094  | 583               |
| 2007 | 94533            | 28310            | 2016             | 7767             | 8206             | 6600             | 563              | 1631             | 1319             | 209               | 66223             | 14407            | 1398             | 768              | 2691              | 8748             | 1786             | 12290             | 636               | 3416              | 18417             | 1058  | 606               |
| 2008 | 92903            | 28425            | 2019             | 7787             | 8261             | 6643             | 516              | 1656             | 1340             | 203               | 64478             | 13677            | 1456             | 804              | 3620              | 9131             | 1883             | 12151             | 251               | 3629              | 16197             | 1054  | 623               |
| 2009 | 94653            | 28612            | 2029             | 7879             | 8322             | 6646             | 495              | 1673             | 1370             | 199</             |                   |                  |                  |                  |                   |                  |                  |                   |                   |                   |                   |       |                   |



Webappendix 6. Estimated numbers of deaths by cause in neonates, children aged 1-59 months at the global, regional and country levels in 2000-2015

| Year    | 0-28 days        |                  |                  |                  |                  |                  |                  |                  |                  |                   | 1-59 months       |                  |                  |                  |                   |                  |                  |                   |                   |                   |                   |        |                   |      |
|---------|------------------|------------------|------------------|------------------|------------------|------------------|------------------|------------------|------------------|-------------------|-------------------|------------------|------------------|------------------|-------------------|------------------|------------------|-------------------|-------------------|-------------------|-------------------|--------|-------------------|------|
|         | USD <sup>1</sup> | NEO <sup>2</sup> | PNE <sup>3</sup> | PRE <sup>4</sup> | INT <sup>5</sup> | SEP <sup>6</sup> | TET <sup>7</sup> | OTH <sup>8</sup> | CON <sup>9</sup> | DIA <sup>10</sup> | POS <sup>11</sup> | PNE <sup>3</sup> | PRE <sup>4</sup> | INT <sup>5</sup> | MEN <sup>12</sup> | OTH <sup>8</sup> | CON <sup>9</sup> | DIA <sup>10</sup> | MEA <sup>13</sup> | INJ <sup>14</sup> | MAL <sup>15</sup> | AIDS   | PER <sup>16</sup> |      |
| Namibia | 2013             | 86794            | 29132            | 1902             | 8928             | 7957             | 6202             | 222              | 1730             | 2030              | 161               | 57662            | 10838            | 1336             | 957               | 1803             | 9525             | 2240              | 7783              | 317               | 4352              | 12353  | 5224              | 934  |
| Namibia | 2014             | 83765            | 29037            | 1882             | 8908             | 7870             | 6180             | 212              | 1706             | 2122              | 157               | 54728            | 9969             | 1354             | 970               | 1513             | 9721             | 2289              | 7501              | 272               | 4487              | 11575  | 4191              | 887  |
| Namibia | 2015             | 82387            | 28799            | 1855             | 8858             | 7759             | 6116             | 201              | 1687             | 2169              | 153               | 53588            | 9914             | 1356             | 971               | 1502             | 9759             | 2311              | 7190              | 268               | 4532              | 10813  | 4103              | 869  |
| Namibia | 2000             | 4352             | 1117             | 73               | 388              | 314              | 148              | 7                | 84               | 97                | 6                 | 3235             | 586              | 58               | 27                | 77               | 374              | 79                | 409               | 4                 | 173               | 101    | 1287              | 61   |
| Namibia | 2001             | 4385             | 1082             | 70               | 379              | 302              | 143              | 6                | 83               | 94                | 6                 | 3303             | 584              | 58               | 27                | 77               | 375              | 79                | 398               | 3                 | 172               | 112    | 1357              | 62   |
| Namibia | 2002             | 4430             | 1050             | 68               | 374              | 288              | 140              | 6                | 79               | 90                | 5                 | 3380             | 598              | 59               | 27                | 78               | 387              | 82                | 396               | 51                | 176               | 66     | 1396              | 63   |
| Namibia | 2003             | 4390             | 1024             | 65               | 371              | 274              | 141              | 5                | 75               | 87                | 5                 | 3366             | 598              | 60               | 27                | 77               | 389              | 83                | 385               | 39                | 177               | 62     | 1405              | 64   |
| Namibia | 2004             | 4291             | 1006             | 63               | 370              | 264              | 141              | 5                | 72               | 86                | 5                 | 3285             | 580              | 59               | 27                | 74               | 381              | 82                | 362               | 4                 | 173               | 111    | 1372              | 61   |
| Namibia | 2005             | 4188             | 997              | 62               | 369              | 257              | 142              | 5                | 70               | 87                | 5                 | 3191             | 599              | 61               | 28                | 75               | 397              | 86                | 361               | 8                 | 181               | 58     | 1276              | 62   |
| Namibia | 2006             | 4026             | 1001             | 61               | 371              | 255              | 144              | 4                | 69               | 91                | 5                 | 3025             | 596              | 61               | 27                | 74               | 398              | 86                | 345               | 15                | 183               | 61     | 1118              | 60   |
| Namibia | 2007             | 3808             | 1020             | 62               | 378              | 257              | 148              | 4                | 67               | 98                | 5                 | 2788             | 607              | 62               | 28                | 75               | 408              | 89                | 335               | 22                | 191               | 15     | 896               | 61   |
| Namibia | 2008             | 3633             | 1038             | 62               | 385              | 258              | 151              | 4                | 67               | 105               | 5                 | 2595             | 609              | 63               | 28                | 75               | 410              | 91                | 321               | 30                | 196               | 8      | 703               | 62   |
| Namibia | 2009             | 3528             | 1062             | 63               | 395              | 262              | 154              | 4                | 66               | 113               | 5                 | 2466             | 614              | 63               | 29                | 75               | 416              | 92                | 311               | 62                | 201               | 4      | 536               | 63   |
| Namibia | 2010             | 3419             | 1095             | 64               | 408              | 267              | 159              | 4                | 66               | 121               | 5                 | 2324             | 531              | 71               | 32                | 53               | 471              | 103               | 332               | 43                | 228               | 2      | 395               | 64   |
| Namibia | 2011             | 3386             | 1118             | 65               | 418              | 269              | 163              | 4                | 66               | 127               | 5                 | 2268             | 540              | 72               | 33                | 53               | 478              | 106               | 324               | 51                | 234               | 2      | 307               | 66   |
| Namibia | 2012             | 3402             | 1148             | 66               | 431              | 273              | 168              | 4                | 66               | 134               | 5                 | 2254             | 549              | 74               | 34                | 53               | 494              | 110               | 320               | 59                | 242               | 4      | 248               | 65   |
| Namibia | 2013             | 3312             | 1170             | 67               | 441              | 274              | 172              | 4                | 65               | 140               | 6                 | 2142             | 550              | 76               | 34                | 52               | 508              | 113               | 314               | 1                 | 250               | 5      | 175               | 64   |
| Namibia | 2014             | 3329             | 1183             | 67               | 448              | 275              | 174              | 4                | 65               | 144               | 6                 | 2146             | 555              | 76               | 35                | 53               | 513              | 115               | 305               | 14                | 254               | 8      | 156               | 63   |
| Namibia | 2015             | 3318             | 1188             | 67               | 452              | 273              | 174              | 4                | 65               | 147               | 5                 | 2130             | 551              | 76               | 35                | 52               | 512              | 115               | 293               | 14                | 254               | 11     | 155               | 63   |
| Niger   | 2000             | 125279           | 24846            | 1891             | 6775             | 7654             | 4087             | 1220             | 1228             | 1770              | 222               | 100433           | 23982            | 1846             | 1013              | 8727             | 11641            | 1950              | 25655             | 6289              | 3989              | 13723  | 857               | 762  |
| Niger   | 2001             | 137274           | 24837            | 1901             | 6935             | 7649             | 4186             | 1088             | 1248             | 1610              | 220               | 112437           | 24541            | 1889             | 1041              | 8946             | 11980            | 2004              | 24920             | 17211             | 4203              | 13996  | 928               | 777  |
| Niger   | 2002             | 128199           | 24738            | 1903             | 7117             | 7554             | 4276             | 953              | 1261             | 1454              | 220               | 103461           | 24577            | 1894             | 1047              | 8979             | 12051            | 2020              | 23621             | 9102              | 4349              | 14053  | 981               | 788  |
| Niger   | 2003             | 131131           | 24612            | 1897             | 7320             | 7393             | 4366             | 827              | 1269             | 1321              | 220               | 106519           | 24278            | 1875             | 1039              | 8877             | 11946            | 2011              | 22031             | 14461             | 4453              | 13724  | 1019              | 806  |
| Niger   | 2004             | 130203           | 24478            | 1884             | 7488             | 7199             | 4491             | 708              | 1275             | 1217              | 216               | 105725           | 23793            | 1842             | 1022              | 8710             | 11744            | 1986              | 20352             | 16718             | 4532              | 13175  | 1032              | 820  |
| Niger   | 2005             | 110550           | 24416            | 1869             | 7590             | 7030             | 4690             | 593              | 1287             | 1150              | 207               | 86134            | 23225            | 1802             | 1004              | 8505             | 11496            | 1957              | 18718             | 343               | 4597              | 12620  | 1031              | 837  |
| Niger   | 2006             | 107627           | 24359            | 1845             | 7595             | 6870             | 4966             | 479              | 1302             | 1109              | 193               | 83268            | 22662            | 1765             | 986               | 8302             | 11264            | 1934              | 17217             | 549               | 4659              | 12073  | 1014              | 844  |
| Niger   | 2007             | 104321           | 24322            | 1815             | 7524             | 6730             | 5284             | 380              | 1319             | 1092              | 177               | 79999            | 22645            | 1771             | 985               | 8426             | 11325            | 1946              | 16221             | 715               | 4834              | 12307  | 977               | 846  |
| Niger   | 2008             | 100967           | 24297            | 1784             | 7438             | 6607             | 5574             | 308              | 1329             | 1095              | 162               | 76670            | 20894            | 1644             | 909               | 7654             | 10456            | 1816              | 14117             | 900               | 4629              | 11892  | 921               | 837  |
| Niger   | 2009             | 97054            | 24353            | 1766             | 7409             | 6566             | 5724             | 267              | 1343             | 1125              | 153               | 72701            | 17723            | 1721             | 950               | 5664             | 10997            | 1912              | 13896             | 195               | 4997              | 12959  | 846               | 841  |
| Niger   | 2010             | 94444            | 24403            | 1750             | 7414             | 6534             | 5803             | 239              | 1349             | 1169              | 146               | 70041            | 17591            | 1714             | 946               | 3721             | 10960            | 1916              | 13040             | 407               | 5128              | 13072  | 682               | 864  |
| Niger   | 2011             | 92059            | 24450            | 1751             | 7449             | 6580             | 5699             | 225              | 1369             | 1234              | 142               | 67609            | 17082            | 1699             | 934               | 3559             | 10887            | 1905              | 12210             | 221               | 5221              | 12416  | 600               | 876  |
| Niger   | 2012             | 90514            | 24590            | 1759             | 7516             | 6643             | 5617             | 217              | 1392             | 1307              | 140               | 65924            | 17051            | 1686             | 924               | 3570             | 10781            | 1900              | 11463             | 467               | 5298              | 11301  | 579               | 905  |
| Niger   | 2013             | 88842            | 24814            | 1792             | 7607             | 6821             | 5377             | 218              | 1455             | 1406              | 139               | 64028            | 16868            | 1653             | 906               | 4553             | 10619            | 1874              | 10681             | 34                | 5302              | 10122  | 532               | 884  |
| Niger   | 2014             | 88347            | 25023            | 1809             | 7688             | 6921             | 5263             | 214              | 1503             | 1487              | 138               | 63324            | 16508            | 1701             | 932               | 4377             | 11004            | 1940              | 10188             | 136               | 5544              | 9706   | 416               | 873  |
| Niger   | 2015             | 87967            | 25495            | 1845             | 7837             | 7091             | 5207             | 212              | 1579             | 1587              | 138               | 62472            | 16447            | 1702             | 933               | 4353             | 11072            | 1954              | 9734              | 134               | 5633              | 9239   | 410               | 861  |
| Nigeria | 2000             | 1011815          | 243837           | 18900            | 67565            | 80626            | 29692            | 17256            | 13323            | 13672             | 2803              | 767978           | 126690           | 10760            | 6220              | 21417            | 65138            | 14085             | 128456            | 143877            | 23919             | 196205 | 24299             | 6911 |
| Nigeria | 2001             | 986192           | 244307           | 19026            | 67736            | 81262            | 30366            | 15931            | 13708            | 13503             | 2774              | 741885           | 129043           | 10999            | 6362              | 21581            | 66672            | 14491             | 125516            | 113478            | 24811             | 195654 | 26147             | 7132 |
| Nigeria | 2002             | 926955           | 244828           | 19117            | 68244            | 81652            | 31044            | 14690            | 13999            | 13352             | 2729              | 682127           | 130616           | 11165            | 6458              | 21472            | 67747            | 14780             | 121780            | 53631             | 25600             | 193842 | 27639             | 7397 |
| Nigeria | 2003             | 1023794          | 245233           | 19157            | 68987            | 81735            | 31801            | 13566            | 14099            | 13221             | 2667              | 778561           | 129320           | 11109            | 6424              | 31697            | 67285            | 14824             | 115544            | 152391            | 25844             | 187665 | 28925             | 7534 |
| Nigeria | 2004             | 914675           | 244723           | 19088            | 69356            | 81476            | 32603            | 12480            | 14052            | 13104             | 2565              | 669952           | 130216           | 11243            | 6499              | 30993            | 68111            | 15125             | 114430            | 48109             | 26554             | 183995 | 30017             | 7660 |
| Nigeria | 2005             | 975525           | 244299           | 19010            | 69509            | 81291            | 33506            | 11492            | 13981            | 13071             | 2441              | 731226           | 130347           | 11324            | 6544              | 30294            | 68485            | 15388             | 106736            | 116845            | 27151             | 179500 | 30840             | 7771 |
| Nigeria | 2006             | 858948           | 242743           | 18810            | 69335            | 80591            | 34327            | 10543            | 13809            | 13027             | 2300              | 616205           | 133587           | 11662            | 6746              | 19873            | 70761            | 15990             | 104671            | 9641              | 28425             | 176106 | 30879             | 7865 |
| Nigeria | 2007             | 842753           | 242060           | 18632            | 69574            | 79804            | 35554            | 9654             | 13624            | 13039             | 2179              | 600693           | 134447           | 11794            | 6831              | 19705            | 71734            | 16323             | 100798            | 6004              | 29224             | 165215 | 30669             | 7949 |
| Nigeria | 2008             | 837850           | 241224           | 18450            | 69790            | 78713            | 36876            | 8811             | 13442            | 13056             | 2085              | 596626           | 133570           | 11772            | 6832              | 29633            | 71874            | 16453             | 95872             | 14364             | 29639             | 148660 | 30181             | 7777 |
| Nigeria | 2009             | 811902           | 241063           | 18378            | 70388            | 78044            | 37400            | 8198             | 13418            | 13199             | 2038              | 570839           | 133259           | 11991            | 6975              | 29701            | 73504            | 16961             | 92944             | 2282              | 30640             | 133006 | 29989             | 7587 |
| Nigeria | 2010             | 808242           | 241117           | 18312            | 71463            | 77570            | 36999            | 7840             | 13478            | 13428             | 2026              | 567125           | 139056           | 12382            | 7228              | 19727            | 75903            | 17705             | 91506             | 11417             | 32145             | 121958 | 30099             | 8000 |
| Nigeria | 2011             | 809090           | 241207           | 18219            | 73146            | 76836            | 36270            | 7667             | 13390            | 13646             | 2034              | 567883           | 139528           | 12495            | 7321              | 19590            | 76246            | 18103             | 88010             | 23218             | 32875             | 111907 | 30099             | 8491 |
| Nigeria | 2012             | 781891           | 240810           | 18009            | 74632            | 75359            | 36682            | 7269             | 13072            | 13765             | 2022              | 541081           | 134191           | 12424            | 7284              | 28224            | 75385            | 18193             | 83410             | 6584              | 33104             | 104535 | 28879             | 8669 |
| Nigeria | 2013             | 800912           | 241561           | 17868            | 76063            | 74232            | 37754            | 6862             | 12816            | 13965             | 2000              | 559351           | 124623           | 12975            | 7608              | 20737            | 79372            | 19198             | 83064             | 35648             | 34973             | 106118 | 26367             | 8669 |
| Nigeria | 2014             | 762534           | 240955           | 17669            | 76434            | 73141            | 38506            | 6412             | 12650            | 14189             | 1953              | 521579           | 118221           | 13030            | 7640              | 19008            | 79960            | 19481             | 79578             | 9583              | 35511             | 104774 | 26316             | 8476 |
| Nigeria | 2015             | 750111           | 240106           | 17516            | 76501            | 72535            | 38508            | 6067             | 12573            | 14500             | 1905              | 510005           | 116050           | 12874            | 7549              | 18669            | 79105            | 19449             | 75087             | 9412              | 35423             | 102368 | 25732             | 8288 |
| Rwanda  | 2000             | 61046            | 14939            | 1131             | 3733             | 4986             | 2726             | 340              | 1026             | 837               | 161               | 46107            | 11603            | 1031             | 578               | 4327             | 6313             | 1413              | 11051             | 666               | 2212              | 3495   | 2963              | 454  |
| Rwanda  | 2001             | 59804            | 14902            | 1130             | 3843             | 5011             | 2622             | 323              | 1018             | 811               | 144               | 44902            | 11910            | 1059             | 604               | 2879             | 6596             | 1476              |                   |                   |                   |        |                   |      |

Webappendix 6. Estimated numbers of deaths by cause in neonates, children aged 1-59 months at the global, regional and country levels in 2000-2015

| Year         | 0-28 days        |                  |                  |                  |                  |                  |                  |                  |                  |                   | 1-59 months       |                  |                  |                  |                   |                  |                  |                   |                   |                   |                   |       |                   |     |
|--------------|------------------|------------------|------------------|------------------|------------------|------------------|------------------|------------------|------------------|-------------------|-------------------|------------------|------------------|------------------|-------------------|------------------|------------------|-------------------|-------------------|-------------------|-------------------|-------|-------------------|-----|
|              | USD <sup>1</sup> | NEO <sup>2</sup> | PNE <sup>3</sup> | PRE <sup>4</sup> | INT <sup>5</sup> | SEP <sup>6</sup> | TET <sup>7</sup> | OTH <sup>8</sup> | CON <sup>9</sup> | DIA <sup>10</sup> | POS <sup>11</sup> | PNE <sup>3</sup> | PRE <sup>4</sup> | INT <sup>5</sup> | MEN <sup>12</sup> | OTH <sup>8</sup> | CON <sup>9</sup> | DIA <sup>10</sup> | MEA <sup>13</sup> | INJ <sup>14</sup> | MAL <sup>15</sup> | AIDS  | PER <sup>16</sup> |     |
| 2008         | 25               | 16               | 0                | 5                | 2                | 3                | 0                | 3                | 3                | 0                 | 9                 | 1                | 0                | 0                | 0                 | 3                | 2                | 0                 | 0                 | 2                 | 0                 | 0     | 0                 |     |
| 2009         | 25               | 16               | 0                | 5                | 2                | 3                | 0                | 3                | 3                | 0                 | 9                 | 1                | 0                | 0                | 0                 | 3                | 2                | 0                 | 0                 | 2                 | 0                 | 0     | 0                 |     |
| 2010         | 24               | 16               | 0                | 5                | 2                | 3                | 0                | 3                | 3                | 0                 | 8                 | 1                | 0                | 0                | 0                 | 3                | 2                | 0                 | 0                 | 2                 | 0                 | 0     | 0                 |     |
| 2011         | 25               | 16               | 0                | 5                | 2                | 3                | 0                | 3                | 3                | 0                 | 9                 | 1                | 0                | 0                | 0                 | 3                | 2                | 0                 | 0                 | 2                 | 0                 | 0     | 0                 |     |
| 2012         | 24               | 16               | 0                | 5                | 2                | 3                | 0                | 3                | 3                | 0                 | 8                 | 1                | 0                | 0                | 0                 | 3                | 2                | 0                 | 0                 | 2                 | 0                 | 0     | 0                 |     |
| 2013         | 24               | 15               | 0                | 5                | 2                | 2                | 0                | 3                | 3                | 0                 | 9                 | 1                | 0                | 0                | 0                 | 3                | 2                | 0                 | 0                 | 2                 | 0                 | 0     | 0                 |     |
| 2014         | 24               | 15               | 0                | 5                | 2                | 2                | 0                | 3                | 3                | 0                 | 9                 | 1                | 0                | 0                | 0                 | 3                | 2                | 0                 | 0                 | 2                 | 0                 | 0     | 0                 |     |
| 2015         | 23               | 14               | 0                | 4                | 1                | 2                | 0                | 3                | 3                | 0                 | 9                 | 1                | 0                | 0                | 0                 | 3                | 2                | 0                 | 0                 | 2                 | 0                 | 0     | 0                 |     |
| Sierra Leone | 2000             | 46041            | 8700             | 609              | 2812             | 2358             | 1381             | 423              | 432              | 540               | 145               | 37341            | 5310             | 507              | 200               | 1198             | 2905             | 580               | 6108              | 7273              | 861               | 11962 | 206               | 230 |
| 2001         | 42650            | 8807             | 609              | 2813             | 2359             | 1538             | 361              | 442              | 541              | 144               | 33843             | 5412             | 519              | 205              | 1218              | 2998             | 597              | 5968              | 3402              | 893               | 12138             | 257   | 236               |     |
| 2002         | 42983            | 9037             | 622              | 2833             | 2415             | 1713             | 305              | 469              | 538              | 142               | 33946             | 5567             | 536              | 212              | 1242              | 3143             | 624              | 5882              | 2988              | 935               | 12284             | 311   | 221               |     |
| 2003         | 43749            | 9349             | 638              | 2899             | 2486             | 1899             | 268              | 497              | 521              | 141               | 34400             | 5763             | 559              | 221              | 1277              | 3319             | 657              | 5827              | 3043              | 988               | 12175             | 364   | 209               |     |
| 2004         | 41175            | 9573             | 649              | 2949             | 2550             | 2019             | 242              | 519              | 505              | 139               | 31602             | 5981             | 583              | 231              | 1312              | 3483             | 693              | 5784              | 41                | 1046              | 11817             | 412   | 221               |     |
| 2005         | 41267            | 9669             | 655              | 2939             | 2614             | 2075             | 217              | 542              | 491              | 135               | 31598             | 6110             | 598              | 238              | 1322              | 3603             | 717              | 5643              | 308               | 1093              | 11295             | 448   | 224               |     |
| 2006         | 41194            | 9742             | 659              | 2885             | 2697             | 2129             | 189              | 570              | 484              | 129               | 31452             | 6194             | 610              | 244              | 1320              | 3703             | 741              | 5455              | 509               | 1134              | 10848             | 467   | 226               |     |
| 2007         | 39909            | 9686             | 653              | 2765             | 2744             | 2181             | 158              | 593              | 473              | 119               | 30223             | 5368             | 625              | 252              | 956               | 3836             | 769              | 5306              | 125               | 1191              | 11092             | 475   | 228               |     |
| 2008         | 38754            | 9502             | 636              | 2649             | 2736             | 2192             | 138              | 590              | 456              | 106               | 29252             | 4956             | 602              | 245              | 832               | 3726             | 751              | 4834              | 409               | 1177              | 11098             | 407   | 216               |     |
| 2009         | 37028            | 9266             | 615              | 2578             | 2690             | 2154             | 127              | 567              | 440              | 95                | 27762             | 4580             | 569              | 233              | 744               | 3549             | 718              | 4317              | 432               | 1144              | 10890             | 375   | 210               |     |
| 2010         | 45639            | 8998             | 593              | 2551             | 2619             | 2067             | 125              | 533              | 426              | 84                | 36641             | 4278             | 536              | 222              | 687               | 3366             | 683              | 3837              | 11024             | 1112              | 10349             | 341   | 207               |     |
| 2011         | 41661            | 8692             | 571              | 2508             | 2528             | 1972             | 118              | 506              | 416              | 74                | 32969             | 3382             | 545              | 229              | 407               | 3465             | 702              | 3685              | 9035              | 1170              | 9870              | 273   | 206               |     |
| 2012         | 33495            | 8385             | 547              | 2450             | 2429             | 1893             | 107              | 485              | 409              | 66                | 25110             | 3161             | 550              | 233              | 335               | 3533             | 718              | 3512              | 2883              | 1218              | 8567              | 195   | 205               |     |
| 2013         | 28904            | 8076             | 523              | 2377             | 2325             | 1827             | 94               | 467              | 405              | 58                | 20828             | 3104             | 549              | 232              | 322               | 3558             | 722              | 3304              | 176               | 1248              | 7257              | 165   | 190               |     |
| 2014         | 27733            | 7792             | 501              | 2317             | 2225             | 1762             | 84               | 449              | 403              | 52                | 19941             | 3271             | 549              | 232              | 385               | 3586             | 728              | 2888              | 582               | 1275              | 6147              | 121   | 178               |     |
| 2015         | 26466            | 7615             | 486              | 2290             | 2156             | 1716             | 77               | 437              | 406              | 48                | 18851             | 3235             | 549              | 232              | 379               | 3615             | 735              | 2740              | 552               | 1300              | 5230              | 114   | 169               |     |
| Somalia      | 2000             | 70614            | 15909            | 1353             | 4445             | 5091             | 1957             | 1284             | 747              | 849               | 183               | 54705            | 11149            | 911              | 530               | 2732             | 5116             | 1125              | 10887             | 18497             | 2194              | 787   | 282               | 495 |
| 2001         | 71071            | 16306            | 1388             | 4526             | 5229             | 1993             | 1344             | 767              | 872              | 188               | 54765             | 11352            | 926              | 541              | 4259              | 5206             | 1146             | 10783             | 16746             | 2234              | 765               | 303   | 504               |     |
| 2002         | 64627            | 16512            | 1409             | 4548             | 5334             | 1953             | 1410             | 777              | 890              | 190               | 48115             | 11829            | 962              | 566              | 4441              | 5451             | 1191             | 10930             | 8831              | 2328              | 771               | 319   | 497               |     |
| 2003         | 64467            | 16610            | 1420             | 4549             | 5403             | 1902             | 1460             | 784              | 901              | 191               | 47857             | 12715            | 1033             | 610              | 3121              | 5898             | 1281             | 11429             | 7643              | 2502              | 803               | 330   | 493               |     |
| 2004         | 68979            | 16692            | 1431             | 4520             | 5493             | 1840             | 1504             | 795              | 916              | 193               | 52287             | 13074            | 1060             | 628              | 3206              | 6051             | 1317             | 11431             | 11098             | 2573              | 993               | 340   | 516               |     |
| 2005         | 68478            | 16886            | 1454             | 4506             | 5622             | 1813             | 1545             | 814              | 938              | 195               | 51592             | 13448            | 1089             | 648              | 3291              | 6236             | 1354             | 11435             | 9187              | 2647              | 1396              | 346   | 513               |     |
| 2006         | 61068            | 17297            | 1495             | 4535             | 5830             | 1811             | 1607             | 848              | 971              | 199               | 43771             | 13898            | 1124             | 673              | 3396              | 6422             | 1403             | 11477             | 205               | 2742              | 1540              | 348   | 543               |     |
| 2007         | 67755            | 17719            | 1541             | 4565             | 6046             | 1839             | 1638             | 882              | 1004             | 203               | 50036             | 14595            | 1181             | 709              | 3561              | 6772             | 1479             | 11663             | 5447              | 2898              | 843               | 348   | 540               |     |
| 2008         | 68485            | 18139            | 1589             | 4582             | 6273             | 1903             | 1627             | 924              | 1037             | 204               | 50346             | 15063            | 1220             | 733              | 3673              | 6949             | 1533             | 11601             | 5176              | 3025              | 435               | 348   | 589               |     |
| 2009         | 64098            | 18399            | 1627             | 4544             | 6455             | 1998             | 1547             | 962              | 1063             | 203               | 45699             | 15308            | 1245             | 747              | 3733              | 7070             | 1572             | 11336             | 380               | 3118              | 258               | 347   | 587               |     |
| 2010         | 64664            | 18551            | 1654             | 4513             | 6574             | 2085             | 1456             | 986              | 1082             | 200               | 45913             | 15374            | 1253             | 751              | 3749              | 7092             | 1586             | 10942             | 836               | 3179              | 215               | 343   | 594               |     |
| 2011         | 78179            | 18436            | 1654             | 4432             | 6589             | 2105             | 1379             | 995              | 1087             | 194               | 59743             | 15248            | 1245             | 747              | 3714              | 7010             | 1583             | 10407             | 15397             | 3208              | 234               | 342   | 607               |     |
| 2012         | 70871            | 18254            | 1646             | 4356             | 6562             | 2072             | 1348             | 991              | 1090             | 189               | 52617             | 14904            | 1219             | 732              | 3622              | 6824             | 1557             | 9759              | 9410              | 3190              | 450               | 336   | 616               |     |
| 2013         | 74463            | 17960            | 1628             | 4251             | 6505             | 2017             | 1302             | 986              | 1091             | 182               | 56503             | 13544            | 1262             | 758              | 3004              | 7085             | 1618             | 9673              | 14473             | 3350              | 816               | 326   | 595               |     |
| 2014         | 61499            | 17761            | 1618             | 4176             | 6474             | 1981             | 1253             | 983              | 1100             | 176               | 43738             | 13232            | 1237             | 742              | 2928              | 6923             | 1591             | 9060              | 3116              | 3335              | 667               | 329   | 578               |     |
| 2015         | 60537            | 17692            | 1619             | 4137             | 6482             | 1965             | 1212             | 985              | 1119             | 172               | 42845             | 13054            | 1223             | 734              | 2883              | 6832             | 1579             | 8581              | 3054              | 3347              | 669               | 322   | 567               |     |
| South Africa | 2000             | 87751            | 18736            | 1577             | 6803             | 4139             | 2481             | 0                | 2627             | 1109              | 0                 | 69015            | 11273            | 1577             | 837               | 1108             | 10895            | 3066              | 10230             | 542               | 4123              | 170   | 24980             | 215 |
| 2001         | 89021            | 17857            | 1503             | 6483             | 3944             | 2364             | 0                | 2504             | 1057             | 0                 | 71164             | 11324            | 1585             | 832              | 1114              | 10920            | 3084             | 10013             | 360               | 4079              | 23                | 27604 | 223               |     |
| 2002         | 88375            | 16833            | 1417             | 6112             | 3718             | 2229             | 0                | 2361             | 997              | 0                 | 71542             | 10881            | 1532             | 797              | 1067              | 10486            | 3000             | 9373              | 600               | 3889              | 28                | 29657 | 231               |     |
| 2003         | 85679            | 15646            | 1317             | 5681             | 3456             | 2072             | 0                | 2194             | 926              | 0                 | 70033             | 10214            | 1448             | 745              | 996               | 9827             | 2852             | 8535              | 569               | 3640              | 43                | 30924 | 240               |     |
| 2004         | 82361            | 14778            | 1244             | 5365             | 3264             | 1957             | 0                | 2072             | 875              | 0                 | 67583             | 9683             | 1361             | 693              | 951               | 9182             | 2685             | 7713              | 696               | 3423              | 25                | 30917 | 254               |     |
| 2005         | 79768            | 14176            | 1193             | 5147             | 3131             | 1877             | 0                | 1988             | 839              | 0                 | 65592             | 9238             | 1344             | 678              | 876               | 9004             | 2669             | 7289              | 300               | 3375              | 18                | 30547 | 254               |     |
| 2006         | 78669            | 14055            | 1148             | 5192             | 3154             | 1659             | 0                | 2129             | 773              | 0                 | 64614             | 9137             | 1347             | 677              | 854               | 8985             | 2701             | 6997              | 382               | 3397              | 25                | 29852 | 259               |     |
| 2007         | 79501            | 14325            | 1282             | 5257             | 3046             | 2078             | 0                | 1802             | 860              | 0                 | 65176             | 9441             | 1394             | 699              | 884               | 9256             | 2822             | 6937              | 426               | 3523              | 10                | 29518 | 266               |     |
| 2008         | 79271            | 14527            | 1184             | 5124             | 3279             | 1953             | 1                | 2078             | 908              | 0                 | 64744             | 9895             | 1472             | 736              | 920               | 9771             | 2994             | 7008              | 146               | 3763              | 12                | 27759 | 268               |     |
| 2009         | 76196            | 14593            | 1085             | 4931             | 3490             | 1821             | 1                | 2320             | 945              | 0                 | 61603             | 10111            | 1528             | 762              | 940               | 10130            | 3122             | 6700              | 735               | 3997              | 12                | 23299 | 268               |     |
| 2010         | 68233            | 14544            | 1171             | 5181             | 3235             | 2160             | 1                | 1812             | 984              | 0                 | 53689             | 9350             | 1571             | 779              | 826               | 10385            | 3221             | 5924              | 3394              | 4326              | 24                | 13620 | 269               |     |
| 2011         | 61178            | 14037            | 927              | 4887             | 3085             | 2119             | 0                | 1824             | 1195             | 0                 | 47141             | 8547             | 1568             | 774              | 699               | 10343            | 3229             | 5561              | 1421              | 4407              | 15                | 10316 | 260               |     |
| 2012         | 56310            | 13224            | 801              | 4477             | 2801             | 1955             | 0                | 1929             | 1260             | 0                 | 43086             | 7727             | 1520             | 749              | 598               | 9995             | 3145             | 5120              | 818               | 4313              | 20                | 8921  | 260               |     |
| 2013         | 48612            | 12377            | 676              | 4507             | 2588             | 1712             | 0                | 1703             | 1191             | 0                 | 36235             | 7486             | 1366             | 673              | 623               | 8981             | 2842             | 4457              | 647               | 3976              | 30                | 4934  | 219               |     |
| 2014         | 44141            | 11627            | 702              | 4074             | 2484             | 1694             | 0                | 1600             | 1073             | 0                 | 32514             | 6781             | 1277             | 629              | 543               | 8388             | 2672             | 3949              | 541               | 3756              | 32                | 3748  | 197               |     |
| 2015         | 41930            | 11141            | 673              | 3903             | 2380             | 1624             | 0                | 1534             | 1028             | 0                 | 30789             | 6432             | 1216             | 599              | 513               | 7970             | 2558             | 3627              | 513               | 3587              | 38                | 3549  | 186               |     |
| South Sudan  | 2000             | 51467            | 16229            | 1319             | 3952             | 5064             | 1605             | 2515             | 742              | 867               | 165               | 35238            | 8375             | 690              | 370               | 2243             | 3562             | 800               | 7987              | 1646              | 1605              | 6644  | 753               | 562 |
| 2001         | 50887            | 16188            | 1334             | 3983             | 5116             | 1641             | 2343             | 751              | 855              | 166               | 34699             | 8506             |                  |                  |                   |                  |                  |                   |                   |                   |                   |       |                   |     |

Webappendix 6. Estimated numbers of deaths by cause in neonates, children aged 1-59 months at the global, regional and country levels in 2000-2015

| Year | 0-28 days        |                  |                  |                  |                  |                  |                  |                  |                  |                   | 1-59 months       |                  |                  |                  |                   |                  |                  |                   |                   |                   |                   |       |                   |
|------|------------------|------------------|------------------|------------------|------------------|------------------|------------------|------------------|------------------|-------------------|-------------------|------------------|------------------|------------------|-------------------|------------------|------------------|-------------------|-------------------|-------------------|-------------------|-------|-------------------|
|      | USD <sup>1</sup> | NEO <sup>2</sup> | PNE <sup>3</sup> | PRE <sup>4</sup> | INT <sup>5</sup> | SEP <sup>6</sup> | TET <sup>7</sup> | OTH <sup>8</sup> | CON <sup>9</sup> | DIA <sup>10</sup> | POS <sup>11</sup> | PNE <sup>3</sup> | PRE <sup>4</sup> | INT <sup>5</sup> | MEN <sup>12</sup> | OTH <sup>8</sup> | CON <sup>9</sup> | DIA <sup>10</sup> | MEA <sup>13</sup> | INJ <sup>14</sup> | MAL <sup>15</sup> | AIDS  | PER <sup>16</sup> |
| 2003 | 21891            | 6914             | 503              | 2047             | 2097             | 1291             | 123              | 393              | 409              | 51                | 14977             | 2395             | 218              | 121              | 533               | 1249             | 308              | 1769              | 205               | 599               | 6310              | 1050  | 220               |
| 2004 | 21952            | 6990             | 502              | 2002             | 2122             | 1381             | 107              | 405              | 425              | 46                | 14962             | 2386             | 218              | 121              | 534               | 1245             | 310              | 1696              | 231               | 604               | 6338              | 1052  | 226               |
| 2005 | 21775            | 7026             | 500              | 1965             | 2131             | 1444             | 95               | 411              | 438              | 43                | 14749             | 2363             | 216              | 121              | 530               | 1245             | 310              | 1617              | 46                | 606               | 6418              | 1057  | 220               |
| 2006 | 21801            | 7032             | 497              | 1948             | 2135             | 1461             | 89               | 412              | 450              | 40                | 14769             | 2345             | 215              | 120              | 526               | 1244             | 310              | 1544              | 100               | 610               | 6449              | 1088  | 218               |
| 2007 | 21756            | 6999             | 492              | 1930             | 2132             | 1446             | 84               | 414              | 463              | 38                | 14757             | 2348             | 216              | 121              | 526               | 1251             | 315              | 1489              | 150               | 619               | 6373              | 1130  | 220               |
| 2008 | 21708            | 6949             | 487              | 1919             | 2116             | 1428             | 80               | 410              | 473              | 36                | 14759             | 2296             | 225              | 127              | 492               | 1311             | 330              | 1487              | 251               | 650               | 6287              | 1080  | 223               |
| 2009 | 21407            | 6929             | 483              | 1919             | 2102             | 1422             | 77               | 407              | 484              | 35                | 14478             | 2142             | 242              | 138              | 407               | 1433             | 358              | 1543              | 158               | 710               | 6132              | 987   | 229               |
| 2010 | 21242            | 6897             | 479              | 1918             | 2079             | 1421             | 74               | 401              | 493              | 34                | 14345             | 2079             | 242              | 148              | 421               | 1556             | 386              | 1584              | 222               | 766               | 5654              | 881   | 224               |
| 2011 | 20861            | 6865             | 474              | 1922             | 2057             | 1411             | 72               | 394              | 502              | 33                | 13996             | 2044             | 282              | 160              | 449               | 1718             | 420              | 1655              | 102               | 842               | 5117              | 613   | 225               |
| 2012 | 20684            | 6824             | 468              | 1929             | 2034             | 1390             | 71               | 387              | 512              | 32                | 13860             | 2044             | 302              | 173              | 481               | 1857             | 454              | 1709              | 222               | 913               | 4520              | 409   | 237               |
| 2013 | 20514            | 6778             | 464              | 1940             | 2011             | 1359             | 70               | 380              | 522              | 32                | 13736             | 2068             | 314              | 179              | 496               | 1951             | 474              | 1706              | 389               | 958               | 4012              | 357   | 232               |
| 2014 | 19849            | 6733             | 458              | 1945             | 1987             | 1336             | 69               | 373              | 533              | 31                | 13116             | 2053             | 335              | 191              | 439               | 2105             | 507              | 1660              | 87                | 1030              | 3775              | 248   | 226               |
| 2015 | 19512            | 6694             | 453              | 1949             | 1964             | 1318             | 67               | 369              | 544              | 31                | 12818             | 2053             | 337              | 192              | 439               | 2132             | 513              | 1606              | 86                | 1047              | 3484              | 243   | 221               |
| 2000 | 168104           | 35492            | 2615             | 10933            | 11085            | 5984             | 546              | 2268             | 1807             | 252               | 132612            | 19640            | 1583             | 1223             | 4580              | 10640            | 2590             | 16731             | 11939             | 4238              | 45595             | 12531 | 1322              |
| 2001 | 161763           | 35552            | 2603             | 10853            | 11087            | 6148             | 495              | 2288             | 1843             | 235               | 126211            | 19283            | 1560             | 1205             | 4475              | 10496            | 2568             | 15613             | 8303              | 4277              | 45094             | 11984 | 1353              |
| 2002 | 162408           | 35468            | 2577             | 10702            | 11018            | 6316             | 434              | 2313             | 1890             | 218               | 126940            | 18031            | 1577             | 1216             | 3961              | 10628            | 2616             | 14868             | 12825             | 4437              | 43852             | 11543 | 1385              |
| 2003 | 154500           | 35378            | 2547             | 10567            | 10911            | 6476             | 380              | 2336             | 1956             | 204               | 119122            | 17090            | 1565             | 1203             | 5513              | 10525            | 2614             | 13863             | 9731              | 4525              | 39851             | 11229 | 1416              |
| 2004 | 139261           | 35191            | 2512             | 10418            | 10773            | 6562             | 334              | 2358             | 2042             | 192               | 104070            | 16851            | 1635             | 1252             | 3406              | 11055            | 2750             | 13594             | 29                | 4863              | 36180             | 11011 | 1445              |
| 2005 | 133428           | 34977            | 2477             | 10272            | 10642            | 6576             | 300              | 2376             | 2151             | 183               | 98451             | 16764            | 1653             | 1262             | 3343              | 11161            | 2808             | 12891             | 88                | 5050              | 30978             | 10984 | 1469              |
| 2006 | 127549           | 34532            | 2427             | 10097            | 10460            | 6458             | 272              | 2376             | 2269             | 173               | 93017             | 16110            | 1598             | 1221             | 4827              | 10752            | 2742             | 11734             | 265               | 5027              | 26021             | 11206 | 1515              |
| 2007 | 121515           | 33839            | 2359             | 9806             | 10196            | 6344             | 244              | 2346             | 2383             | 160               | 87676             | 15260            | 1566             | 1195             | 4419              | 10553            | 2710             | 10819             | 484               | 5059              | 22895             | 11227 | 1490              |
| 2008 | 115541           | 33055            | 2281             | 9497             | 9914             | 6193             | 219              | 2305             | 2500             | 148               | 82486             | 14937            | 1537             | 1172             | 2835              | 10315            | 2686             | 10010             | 566               | 5094              | 20655             | 11138 | 1540              |
| 2009 | 110271           | 32354            | 2208             | 9208             | 9631             | 6112             | 197              | 2249             | 2612             | 137               | 77917             | 14141            | 1502             | 1146             | 2608              | 10096            | 2651             | 9240              | 629               | 5091              | 18087             | 11214 | 1513              |
| 2010 | 105431           | 31615            | 2137             | 8973             | 9352             | 5957             | 183              | 2176             | 2709             | 129               | 73816             | 13944            | 1497             | 1142             | 2549              | 10059            | 2662             | 8739              | 143               | 5179              | 15051             | 11302 | 1549              |
| 2011 | 100125           | 30936            | 2066             | 8756             | 9055             | 5853             | 170              | 2080             | 2834             | 122               | 69189             | 13818            | 1507             | 1147             | 2506              | 10147            | 2698             | 8314              | 286               | 5333              | 11989             | 9883  | 1561              |
| 2012 | 93935            | 30363            | 2003             | 8561             | 8801             | 5727             | 161              | 1992             | 3002             | 116               | 63572             | 13902            | 1514             | 1147             | 2543              | 10150            | 2728             | 7863              | 407               | 5488              | 9365              | 6849  | 1616              |
| 2013 | 90205            | 29963            | 1959             | 8426             | 8614             | 5630             | 151              | 1946             | 3124             | 113               | 60242             | 13674            | 1499             | 1136             | 2827              | 10148            | 2726             | 7406              | 148               | 5526              | 7611              | 6002  | 1537              |
| 2014 | 86880            | 29841            | 1936             | 8373             | 8518             | 5566             | 145              | 1922             | 3270             | 110               | 57039             | 11997            | 1548             | 1172             | 2328              | 10633            | 2839             | 7280              | 106               | 5789              | 6941              | 4950  | 1456              |
| 2015 | 85291            | 29738            | 1916             | 8351             | 8430             | 5514             | 139              | 1907             | 3371             | 109               | 55553             | 11791            | 1531             | 1160             | 2285              | 10566            | 2833             | 6892              | 103               | 5777              | 6375              | 4821  | 1418              |
| 2000 | 173227           | 42852            | 3276             | 11890            | 13896            | 7692             | 723              | 2672             | 2402             | 300               | 130375            | 27879            | 2211             | 1626             | 6283              | 15502            | 3328             | 23227             | 3520              | 6437              | 21993             | 16987 | 1382              |
| 2001 | 167206           | 42639            | 3241             | 11791            | 13805            | 7710             | 656              | 2670             | 2492             | 274               | 124567            | 26933            | 2133             | 1598             | 6047              | 15028            | 3270             | 21267             | 3314              | 6421              | 19980             | 17199 | 1378              |
| 2002 | 161756           | 42625            | 3217             | 11722            | 13792            | 7737             | 598              | 2685             | 2624             | 249               | 119131            | 25740            | 2036             | 1553             | 8795              | 14372            | 3180             | 19253             | 1718              | 6339              | 17530             | 17215 | 1401              |
| 2003 | 156356           | 42632            | 3189             | 11651            | 13752            | 7796             | 541              | 2695             | 2783             | 226               | 113724            | 25977            | 2055             | 1596             | 5759              | 14625            | 3277             | 18405             | 1252              | 6614              | 15722             | 17034 | 1408              |
| 2004 | 150635           | 42609            | 3155             | 11552            | 13704            | 7826             | 491              | 2706             | 2969             | 206               | 108026            | 25329            | 2003             | 1586             | 5552              | 14292            | 3266             | 17002             | 963               | 6667              | 13233             | 16694 | 1439              |
| 2005 | 144612           | 42290            | 3095             | 11375            | 13543            | 7797             | 443              | 2697             | 3152             | 188               | 102322            | 24600            | 1945             | 1570             | 5322              | 13866            | 3244             | 15659             | 804               | 6687              | 11069             | 16040 | 1516              |
| 2006 | 138036           | 41627            | 3012             | 11110            | 13269            | 7672             | 399              | 2666             | 3328             | 171               | 96409             | 23751            | 1898             | 1526             | 5069              | 13380            | 3206             | 14344             | 388               | 6662              | 9290              | 15332 | 1563              |
| 2007 | 130760           | 40576            | 2891             | 10703            | 12838            | 7544             | 348              | 2617             | 3481             | 154               | 90184             | 22424            | 1809             | 1452             | 4724              | 12538            | 3101             | 12852             | 1242              | 6489              | 7776              | 14107 | 1670              |
| 2008 | 123662           | 39760            | 2787             | 10361            | 12441            | 7514             | 305              | 2566             | 3645             | 140               | 83902             | 21296            | 1740             | 1383             | 4435              | 11863            | 3009             | 11597             | 1269              | 6349              | 6629              | 12613 | 1720              |
| 2009 | 117550           | 38966            | 2680             | 9993             | 12022            | 7576             | 262              | 2516             | 3788             | 128               | 78584             | 17423            | 1859             | 1474             | 2867              | 12685            | 3257             | 11690             | 1115              | 6907              | 6421              | 11101 | 1784              |
| 2010 | 112100           | 38421            | 2597             | 9777             | 11657            | 7625             | 236              | 2435             | 3975             | 119               | 72779             | 16647            | 1826             | 1454             | 2654              | 12447            | 3251             | 10841             | 930               | 6933              | 5805              | 8224  | 1768              |
| 2011 | 106181           | 38373            | 2551             | 9663             | 11480            | 7736             | 216              | 2407             | 4205             | 114               | 67808             | 16164            | 1786             | 1420             | 2572              | 12045            | 3225             | 10009             | 968               | 6891              | 5254              | 5665  | 1810              |
| 2012 | 103423           | 38401            | 2525             | 9639             | 11374            | 7760             | 203              | 2394             | 4395             | 111               | 65022             | 15919            | 1791             | 1416             | 2498              | 12032            | 3273             | 9517              | 347               | 6967              | 4960              | 4502  | 1801              |
| 2013 | 101993           | 38608            | 2514             | 9672             | 11342            | 7798             | 193              | 2412             | 4570             | 108               | 63385             | 13062            | 1975             | 1562             | 1551              | 13480            | 3661             | 8807              | 460               | 7730              | 5237              | 4106  | 1756              |
| 2014 | 99367            | 38684            | 2494             | 9692             | 11259            | 7783             | 185              | 2398             | 4767             | 106               | 60683             | 12134            | 1997             | 1579             | 1244              | 13700            | 3755             | 8322              | 439               | 7888              | 5122              | 2822  | 1681              |
| 2015 | 98180            | 38575            | 2468             | 9689             | 11144            | 7727             | 177              | 2388             | 4878             | 105               | 59605             | 11925            | 1980             | 1566             | 1219              | 13569            | 3777             | 7896              | 429               | 7844              | 4977              | 2771  | 1651              |
| 2000 | 75031            | 15455            | 1129             | 4393             | 4885             | 2883             | 229              | 1033             | 789              | 115               | 59576             | 11268            | 757              | 841              | 2069              | 6591             | 1457             | 10694             | 3615              | 2306              | 11259             | 8287  | 433               |
| 2001 | 71518            | 15465            | 1122             | 4319             | 4879             | 2985             | 196              | 1068             | 790              | 105               | 56053             | 10959            | 737              | 822              | 1997              | 6428             | 1426             | 9853              | 2127              | 2315              | 10470             | 8476  | 444               |
| 2002 | 69113            | 15244            | 1098             | 4203             | 4788             | 3021             | 164              | 1084             | 793              | 93                | 53869             | 10447            | 705              | 788              | 1888              | 6129             | 1377             | 8830              | 3279              | 2301              | 9051              | 8620  | 455               |
| 2003 | 62498            | 14841            | 1060             | 4054             | 4635             | 2996             | 137              | 1077             | 801              | 81                | 47657             | 9910             | 672              | 751              | 1777              | 5815             | 1324             | 7854              | 715               | 2283              | 7374              | 8717  | 465               |
| 2004 | 58084            | 14510            | 1027             | 3939             | 4504             | 2964             | 118              | 1062             | 825              | 71                | 43574             | 8078             | 701              | 783              | 1149              | 6068             | 1395             | 7646              | 6                 | 2468              | 6159              | 8649  | 473               |
| 2005 | 55218            | 14216            | 996              | 3843             | 4388             | 2922             | 104              | 1043             | 856              | 63                | 41002             | 7839             | 682              | 767              | 1114              | 5902             | 1374             | 7006              | 101               | 2487              | 4689              | 8557  | 486               |
| 2006 | 53094            | 14078            | 978              | 3799             | 4323             | 2902             | 97               | 1025             | 896              | 59                | 39016             | 7689             | 672              | 757              | 1088              | 5802             | 1371             | 6514              | 222               | 2516              | 3716              | 8172  | 497               |
| 2007 | 51031            | 14098            | 972              | 3798             | 4306             | 2914             | 93               | 1010             | 949              | 56                | 36933             | 7608             | 668              | 753              | 1069              | 5749             | 1375             | 6118              | 218               | 2560              | 3131              | 7176  | 509               |
| 2008 | 49564            | 14168            | 971              | 3809             | 4307             | 2935             | 91               | 1003             | 999              | 54                | 35396             | 7443             | 674              | 759              | 1003              | 5791             | 1404             | 5853              | 87                |                   |                   |       |                   |



Webappendix 6. Estimated numbers of deaths by cause in neonates, children aged 1-59 months at the global, regional and country levels in 2000-2015

| Year    | 0-28 days        |                  |                  |                  |                  |                  |                  |                  |                  |                   |                   | 1-59 months      |                  |                  |                   |                  |                  |                   |                   |                   |                   |      |                   |     |
|---------|------------------|------------------|------------------|------------------|------------------|------------------|------------------|------------------|------------------|-------------------|-------------------|------------------|------------------|------------------|-------------------|------------------|------------------|-------------------|-------------------|-------------------|-------------------|------|-------------------|-----|
|         | USD <sup>1</sup> | NEO <sup>2</sup> | PNE <sup>3</sup> | PRE <sup>4</sup> | INT <sup>5</sup> | SEP <sup>6</sup> | TET <sup>7</sup> | OTH <sup>8</sup> | CON <sup>9</sup> | DIA <sup>10</sup> | POS <sup>11</sup> | PNE <sup>3</sup> | PRE <sup>4</sup> | INT <sup>5</sup> | MEN <sup>12</sup> | OTH <sup>8</sup> | CON <sup>9</sup> | DIA <sup>10</sup> | MEA <sup>13</sup> | INJ <sup>14</sup> | MAL <sup>15</sup> | AIDS | PER <sup>16</sup> |     |
| Iraq    | 2014             | 142              | 24               | 0                | 11               | 1                | 1                | 0                | 2                | 10                | 0                 | 118              | 4                | 23               | 5                 | 1                | 35               | 41                | 1                 | 0                 | 7                 | 0    | 0                 | 0   |
| Iraq    | 2015             | 135              | 24               | 0                | 9                | 1                | 1                | 0                | 2                | 11                | 0                 | 111              | 3                | 20               | 3                 | 2                | 36               | 38                | 1                 | 0                 | 8                 | 0    | 1                 | 0   |
| Iraq    | 2000             | 37398            | 20579            | 1269             | 6559             | 5087             | 3309             | 170              | 1435             | 2617              | 133               | 16819            | 5099             | 476              | 336               | 576              | 3628             | 898               | 3294              | 532               | 1803              | 0    | 0                 | 176 |
| Iraq    | 2001             | 37323            | 20608            | 1257             | 6446             | 5066             | 3437             | 149              | 1470             | 2658              | 125               | 16715            | 5070             | 481              | 340               | 574              | 3630             | 932               | 3168              | 533               | 1804              | 0    | 0                 | 183 |
| Iraq    | 2002             | 37266            | 20495            | 1239             | 6340             | 5007             | 3494             | 134              | 1483             | 2678              | 119               | 16771            | 5024             | 483              | 341               | 575              | 3621             | 956               | 3037              | 751               | 1797              | 0    | 0                 | 187 |
| Iraq    | 2003             | 36428            | 20350            | 1225             | 6341             | 4943             | 3429             | 130              | 1464             | 2701              | 116               | 16078            | 4988             | 484              | 341               | 576              | 3618             | 972               | 2920              | 196               | 1793              | 0    | 0                 | 191 |
| Iraq    | 2004             | 36555            | 20226            | 1218             | 6458             | 4888             | 3246             | 136              | 1417             | 2746              | 117               | 16329            | 4964             | 487              | 344               | 569              | 3622             | 998               | 2811              | 545               | 1794              | 0    | 0                 | 195 |
| Iraq    | 2005             | 36148            | 20306            | 1224             | 6712             | 4880             | 3022             | 151              | 1370             | 2826              | 121               | 15842            | 4975             | 494              | 347               | 565              | 3645             | 1027              | 2726              | 49                | 1808              | 0    | 0                 | 206 |
| Iraq    | 2006             | 36620            | 20781            | 1252             | 7036             | 4969             | 2909             | 164              | 1366             | 2961              | 124               | 15839            | 4982             | 501              | 352               | 558              | 3661             | 1064              | 2641              | 41                | 1821              | 0    | 0                 | 219 |
| Iraq    | 2007             | 37373            | 21322            | 1280             | 7319             | 5071             | 2874             | 171              | 1380             | 3102              | 126               | 16051            | 5057             | 515              | 360               | 559              | 3736             | 1112              | 2594              | 33                | 1859              | 0    | 0                 | 226 |
| Iraq    | 2008             | 38272            | 21935            | 1313             | 7513             | 5203             | 2940             | 168              | 1418             | 3254              | 125               | 16337            | 5155             | 530              | 369               | 567              | 3846             | 1159              | 2558              | 32                | 1906              | 0    | 0                 | 214 |
| Iraq    | 2009             | 39680            | 22508            | 1340             | 7623             | 5324             | 3076             | 159              | 1469             | 3395              | 123               | 17172            | 5247             | 547              | 380               | 572              | 3944             | 1217              | 2518              | 588               | 1951              | 0    | 0                 | 208 |
| Iraq    | 2010             | 39727            | 22959            | 1357             | 7616             | 5421             | 3255             | 142              | 1531             | 3519              | 117               | 16768            | 5296             | 557              | 384               | 571              | 3998             | 1249              | 2457              | 60                | 1983              | 0    | 0                 | 214 |
| Iraq    | 2011             | 39839            | 23210            | 1362             | 7620             | 5457             | 3348             | 132              | 1565             | 3613              | 113               | 16629            | 5265             | 560              | 384               | 559              | 3993             | 1273              | 2361              | 38                | 1984              | 0    | 0                 | 211 |
| Iraq    | 2012             | 39851            | 23254            | 1357             | 7685             | 5434             | 3294             | 130              | 1554             | 3689              | 111               | 16597            | 4953             | 590              | 405               | 483              | 4186             | 1362              | 2205              | 100               | 2087              | 0    | 0                 | 224 |
| Iraq    | 2013             | 39574            | 23091            | 1343             | 7808             | 5346             | 3110             | 135              | 1498             | 3739              | 111               | 16483            | 4659             | 618              | 424               | 412              | 4368             | 1447              | 2091              | 59                | 2180              | 0    | 0                 | 224 |
| Iraq    | 2014             | 39102            | 22866            | 1324             | 7863             | 5242             | 2964             | 135              | 1450             | 3778              | 110               | 16236            | 4595             | 607              | 417               | 409              | 4266             | 1443              | 2091              | 49                | 2139              | 0    | 0                 | 220 |
| Iraq    | 2015             | 38682            | 22482            | 1294             | 7820             | 5109             | 2840             | 131              | 1404             | 3778              | 107               | 16200            | 4584             | 611              | 419               | 406              | 4270             | 1475              | 2017              | 48                | 2150              | 0    | 0                 | 220 |
| Jordan  | 2000             | 4103             | 2481             | 114              | 1002             | 396              | 170              | 61               | 272              | 466               | 0                 | 1622             | 368              | 86               | 22                | 29               | 310              | 261               | 197               | 0                 | 323               | 0    | 0                 | 27  |
| Jordan  | 2001             | 3967             | 2417             | 107              | 970              | 381              | 158              | 67               | 271              | 462               | 0                 | 1550             | 321              | 105              | 26                | 33               | 324              | 255               | 162               | 0                 | 299               | 0    | 0                 | 26  |
| Jordan  | 2002             | 3845             | 2342             | 101              | 937              | 365              | 174              | 43               | 268              | 454               | 0                 | 1503             | 297              | 120              | 30                | 32               | 312              | 256               | 142               | 0                 | 290               | 0    | 0                 | 25  |
| Jordan  | 2003             | 3740             | 2265             | 96               | 903              | 348              | 151              | 57               | 263              | 447               | 0                 | 1475             | 284              | 119              | 30                | 31               | 307              | 256               | 133               | 0                 | 290               | 0    | 0                 | 25  |
| Jordan  | 2004             | 3674             | 2228             | 93               | 888              | 337              | 156              | 43               | 263              | 448               | 0                 | 1446             | 272              | 116              | 30                | 29               | 303              | 255               | 126               | 0                 | 289               | 0    | 0                 | 25  |
| Jordan  | 2005             | 3660             | 2208             | 91               | 880              | 329              | 165              | 26               | 265              | 451               | 0                 | 1452             | 268              | 118              | 30                | 29               | 302              | 261               | 120               | 0                 | 296               | 0    | 0                 | 27  |
| Jordan  | 2006             | 3642             | 2200             | 90               | 877              | 323              | 171              | 14               | 268              | 457               | 0                 | 1442             | 261              | 121              | 31                | 28               | 299              | 265               | 112               | 0                 | 297               | 0    | 0                 | 27  |
| Jordan  | 2007             | 3662             | 2201             | 88               | 876              | 319              | 167              | 13               | 273              | 465               | 0                 | 1461             | 260              | 125              | 32                | 28               | 301              | 274               | 108               | 0                 | 304               | 0    | 0                 | 29  |
| Jordan  | 2008             | 3719             | 2247             | 89               | 895              | 321              | 169              | 13               | 279              | 482               | 0                 | 1472             | 258              | 128              | 33                | 27               | 303              | 280               | 106               | 0                 | 307               | 0    | 0                 | 30  |
| Jordan  | 2009             | 3773             | 2274             | 89               | 908              | 319              | 172              | 13               | 278              | 495               | 0                 | 1499             | 260              | 133              | 34                | 27               | 307              | 289               | 106               | 0                 | 311               | 0    | 0                 | 32  |
| Jordan  | 2010             | 3788             | 2288             | 90               | 919              | 312              | 175              | 13               | 273              | 507               | 0                 | 1500             | 257              | 136              | 35                | 26               | 305              | 293               | 104               | 0                 | 309               | 0    | 0                 | 34  |
| Jordan  | 2011             | 3826             | 2307             | 91               | 935              | 301              | 179              | 13               | 266              | 520               | 0                 | 1519             | 258              | 141              | 37                | 26               | 309              | 301               | 104               | 0                 | 310               | 0    | 0                 | 34  |
| Jordan  | 2012             | 3845             | 2312             | 93               | 945              | 290              | 182              | 13               | 258              | 531               | 0                 | 1533             | 257              | 145              | 38                | 25               | 311              | 307               | 104               | 0                 | 310               | 0    | 0                 | 35  |
| Jordan  | 2013             | 3829             | 2294             | 92               | 940              | 281              | 181              | 13               | 251              | 536               | 0                 | 1535             | 254              | 148              | 39                | 25               | 311              | 312               | 103               | 0                 | 308               | 0    | 0                 | 35  |
| Jordan  | 2014             | 3786             | 2266             | 91               | 928              | 274              | 177              | 13               | 245              | 537               | 0                 | 1520             | 248              | 149              | 40                | 24               | 308              | 312               | 101               | 0                 | 304               | 0    | 0                 | 35  |
| Jordan  | 2015             | 3670             | 2184             | 88               | 893              | 262              | 169              | 12               | 236              | 524               | 0                 | 1486             | 239              | 149              | 39                | 22               | 301              | 309               | 97                | 0                 | 295               | 0    | 0                 | 34  |
| Kuwait  | 2000             | 573              | 298              | 4                | 119              | 14               | 9                | 0                | 11               | 141               | 0                 | 275              | 30               | 16               | 8                 | 4                | 58               | 118               | 3                 | 0                 | 38                | 0    | 0                 | 0   |
| Kuwait  | 2001             | 567              | 293              | 3                | 108              | 22               | 13               | 0                | 13               | 135               | 0                 | 274              | 29               | 23               | 3                 | 8                | 42               | 122               | 4                 | 0                 | 44                | 0    | 0                 | 0   |
| Kuwait  | 2002             | 542              | 274              | 4                | 120              | 9                | 4                | 0                | 12               | 126               | 0                 | 268              | 28               | 23               | 6                 | 1                | 66               | 112               | 3                 | 0                 | 29                | 0    | 0                 | 0   |
| Kuwait  | 2003             | 514              | 254              | 5                | 99               | 9                | 7                | 0                | 7                | 127               | 0                 | 260              | 24               | 19               | 7                 | 6                | 56               | 111               | 4                 | 0                 | 33                | 0    | 0                 | 0   |
| Kuwait  | 2004             | 502              | 248              | 1                | 93               | 16               | 5                | 0                | 8                | 124               | 0                 | 254              | 22               | 20               | 5                 | 4                | 61               | 111               | 0                 | 0                 | 31                | 0    | 0                 | 0   |
| Kuwait  | 2005             | 518              | 260              | 2                | 99               | 18               | 8                | 0                | 8                | 126               | 0                 | 258              | 21               | 19               | 9                 | 6                | 50               | 113               | 5                 | 0                 | 35                | 0    | 0                 | 0   |
| Kuwait  | 2006             | 552              | 279              | 1                | 111              | 19               | 4                | 0                | 9                | 134               | 0                 | 273              | 18               | 32               | 8                 | 1                | 51               | 134               | 1                 | 0                 | 27                | 0    | 0                 | 0   |
| Kuwait  | 2007             | 611              | 309              | 3                | 143              | 19               | 3                | 0                | 6                | 134               | 0                 | 302              | 32               | 43               | 7                 | 3                | 52               | 128               | 5                 | 0                 | 32                | 0    | 0                 | 0   |
| Kuwait  | 2008             | 678              | 333              | 3                | 135              | 15               | 11               | 0                | 3                | 165               | 0                 | 345              | 23               | 52               | 6                 | 0                | 68               | 159               | 3                 | 0                 | 33                | 0    | 0                 | 0   |
| Kuwait  | 2009             | 736              | 348              | 3                | 147              | 6                | 13               | 0                | 9                | 171               | 0                 | 388              | 35               | 79               | 7                 | 5                | 69               | 151               | 3                 | 0                 | 38                | 0    | 0                 | 0   |
| Kuwait  | 2010             | 763              | 335              | 1                | 123              | 14               | 13               | 0                | 10               | 174               | 0                 | 428              | 40               | 81               | 12                | 5                | 79               | 157               | 2                 | 0                 | 53                | 0    | 0                 | 0   |
| Kuwait  | 2011             | 753              | 313              | 4                | 136              | 10               | 6                | 0                | 7                | 150               | 0                 | 440              | 66               | 76               | 11                | 11               | 76               | 145               | 4                 | 0                 | 52                | 0    | 0                 | 0   |
| Kuwait  | 2012             | 725              | 282              | 2                | 132              | 9                | 4                | 0                | 10               | 124               | 0                 | 443              | 60               | 78               | 6                 | 8                | 92               | 150               | 3                 | 0                 | 46                | 0    | 0                 | 0   |
| Kuwait  | 2013             | 677              | 261              | 1                | 131              | 9                | 2                | 0                | 13               | 105               | 0                 | 416              | 59               | 63               | 0                 | 7                | 102              | 146               | 2                 | 0                 | 36                | 0    | 0                 | 0   |
| Kuwait  | 2014             | 634              | 240              | 2                | 113              | 8                | 3                | 0                | 9                | 106               | 0                 | 394              | 56               | 65               | 5                 | 8                | 82               | 134               | 3                 | 0                 | 40                | 0    | 0                 | 0   |
| Kuwait  | 2015             | 598              | 222              | 2                | 104              | 7                | 3                | 0                | 8                | 98                | 0                 | 376              | 54               | 62               | 5                 | 8                | 78               | 128               | 3                 | 0                 | 39                | 0    | 0                 | 0   |
| Lebanon | 2000             | 1226             | 720              | 37               | 286              | 113              | 57               | 0                | 59               | 168               | 0                 | 506              | 94               | 15               | 4                 | 8                | 116              | 102               | 51                | 9                 | 100               | 0    | 1                 | 6   |
| Lebanon | 2001             | 1149             | 678              | 35               | 266              | 104              | 53               | 0                | 58               | 161               | 0                 | 471              | 84               | 15               | 4                 | 7                | 117              | 96                | 50                | 0                 | 91                | 0    | 1                 | 6   |
| Lebanon | 2002             | 1096             | 641              | 33               | 248              | 97               | 50               | 0                | 58               | 155               | 0                 | 455              | 78               | 16               | 4                 | 7                | 114              | 94                | 51                | 0                 | 85                | 0    | 1                 | 6   |
| Lebanon | 2003             | 1046             | 613              | 30               | 235              | 91               | 48               | 0                | 58               | 150               | 0                 | 433              | 66               | 22               | 6                 | 7                | 113              | 92                | 45                | 2                 | 72                | 0    | 1                 | 7   |
| Lebanon | 2004             | 975              | 572              | 27               | 217              | 84               | 45               | 0                | 57               | 142               | 0                 | 403              | 59               | 23               | 6                 | 7                | 103              | 88                | 40                | 3                 | 66                | 0    | 1                 | 7   |
| Lebanon | 2005             | 881              | 513              | 23               | 193              | 74               | 39               | 0                | 54               | 129               | 0                 | 368              | 52               | 24               | 7                 | 6                | 90               | 83                | 34                | 5                 | 59                | 0    | 1                 | 7   |
| Lebanon | 2006             | 772              | 443              | 18               | 166              | 64               | 33               | 0                | 50               | 113               | 0                 | 329              | 45               | 25               | 7                 | 5                | 78               | 77                | 27                | 6                 | 51                | 0    | 1                 | 6   |
| Lebanon | 2007             | 656              | 375              | 14               | 140              | 53               | 27               | 0                | 44               | 97                | 0                 | 281              | 37               | 24               | 7                 | 4                | 64               | 68                | 21                | 7                 | 43                | 0    | 1                 | 6   |
| Lebanon | 2008             | 556              | 315              | 11               | 117              | 44               | 22               | 0                | 39               | 82                | 0                 | 241              | 30               | 23               | 7                 | 3                | 53               | 60                | 16                | 6                 | 36                | 0    | 1                 | 6   |
| Lebanon | 2009             | 504              | 284              | 9                | 106              | 40               | 19               | 0                | 36               | 75                | 0                 | 220              | 26               | 23               | 7                 | 3                | 48               | 55                | 14                | 6                 | 32                | 0    | 1                 | 5   |
| Lebanon | 2010             | 506              | 289              | 8                | 107              | 40               | 19               | 0                | 38               | 77                | 0                 | 217              | 25               | 25               | 7                 | 3                | 47               | 55                | 13                | 6                 | 31                | 0    | 1                 | 5   |
| Lebanon | 2011             | 556              | 318              | 9                | 118              | 44               | 20               | 0                | 42               | 85                | 0                 | 238              | 26               | 30               | 8                 | 3                | 51               | 61                | 13                | 6                 | 33                | 0    | 1                 | 6   |
| Lebanon | 2012             |                  |                  |                  |                  |                  |                  |                  |                  |                   |                   |                  |                  |                  |                   |                  |                  |                   |                   |                   |                   |      |                   |     |

Webappendix 6. Estimated numbers of deaths by cause in neonates, children aged 1-59 months at the global, regional and country levels in 2000-2015

| Year | 0-28 days        |                  |                  |                  |                  |                  |                  |                  |                  |                   |                   | 1-59 months      |                  |                  |                   |                  |                  |                   |                   |                   |                   |      |                   |     |
|------|------------------|------------------|------------------|------------------|------------------|------------------|------------------|------------------|------------------|-------------------|-------------------|------------------|------------------|------------------|-------------------|------------------|------------------|-------------------|-------------------|-------------------|-------------------|------|-------------------|-----|
|      | USD <sup>1</sup> | NEO <sup>2</sup> | PNE <sup>3</sup> | PRE <sup>4</sup> | INT <sup>5</sup> | SEP <sup>6</sup> | TET <sup>7</sup> | OTH <sup>8</sup> | CON <sup>9</sup> | DIA <sup>10</sup> | POS <sup>11</sup> | PNE <sup>3</sup> | PRE <sup>4</sup> | INT <sup>5</sup> | MEN <sup>12</sup> | OTH <sup>8</sup> | CON <sup>9</sup> | DIA <sup>10</sup> | MEA <sup>13</sup> | INJ <sup>14</sup> | MAL <sup>15</sup> | AIDS | PER <sup>16</sup> |     |
| 2009 | 10818            | 5929             | 91               | 2330             | 906              | 427              | 0                | 720              | 1456             | 0                 | 4889              | 632              | 414              | 103              | 85                | 1329             | 1093             | 157               | 1                 | 971               | 0                 | 0    | 0                 | 104 |
| 2010 | 10644            | 5850             | 87               | 2321             | 877              | 420              | 0                | 691              | 1454             | 0                 | 4794              | 588              | 400              | 100              | 81                | 1325             | 1079             | 143               | 1                 | 972               | 0                 | 0    | 0                 | 105 |
| 2011 | 10440            | 5709             | 83               | 2284             | 839              | 406              | 0                | 660              | 1438             | 0                 | 4731              | 554              | 389              | 97               | 77                | 1331             | 1069             | 133               | 1                 | 977               | 0                 | 0    | 0                 | 103 |
| 2012 | 10151            | 5519             | 77               | 2226             | 795              | 389              | 0                | 625              | 1406             | 0                 | 4632              | 520              | 378              | 94               | 73                | 1322             | 1051             | 123               | 0                 | 970               | 0                 | 0    | 0                 | 101 |
| 2013 | 9795             | 5356             | 72               | 2171             | 758              | 372              | 0                | 602              | 1381             | 0                 | 4439              | 484              | 363              | 91               | 68                | 1275             | 1014             | 113               | 1                 | 934               | 0                 | 0    | 0                 | 97  |
| 2014 | 9405             | 5112             | 66               | 2078             | 715              | 350              | 0                | 573              | 1331             | 0                 | 4293              | 457              | 355              | 89               | 63                | 1237             | 989              | 106               | 1                 | 903               | 0                 | 0    | 0                 | 94  |
| 2015 | 9002             | 4866             | 60               | 1980             | 674              | 328              | 0                | 546              | 1278             | 0                 | 4136              | 431              | 348              | 87               | 59                | 1193             | 962              | 99                | 1                 | 866               | 0                 | 0    | 0                 | 90  |
| 2000 | 12162            | 6520             | 360              | 2565             | 1218             | 437              | 68               | 369              | 1503             | 0                 | 5642              | 1389             | 170              | 108              | 72                | 1213             | 1010             | 1157              | 0                 | 424               | 0                 | 1    | 98                |     |
| 2001 | 11543            | 6246             | 337              | 2426             | 1153             | 418              | 67               | 384              | 1462             | 0                 | 5297              | 1148             | 224              | 143              | 82                | 1268             | 977              | 976               | 0                 | 379               | 0                 | 1    | 98                |     |
| 2002 | 10816            | 5863             | 308              | 2246             | 1068             | 395              | 66               | 392              | 1388             | 0                 | 4953              | 1043             | 212              | 138              | 75                | 1187             | 937              | 891               | 0                 | 376               | 0                 | 1    | 94                |     |
| 2003 | 10030            | 5455             | 279              | 2070             | 974              | 379              | 61               | 391              | 1300             | 0                 | 4575              | 932              | 198              | 130              | 68                | 1097             | 886              | 804               | 0                 | 368               | 0                 | 2    | 91                |     |
| 2004 | 9359             | 5069             | 252              | 1904             | 889              | 354              | 63               | 390              | 1217             | 0                 | 4290              | 844              | 188              | 124              | 63                | 1030             | 849              | 739               | 0                 | 361               | 0                 | 2    | 90                |     |
| 2005 | 8947             | 4854             | 237              | 1805             | 837              | 343              | 58               | 401              | 1174             | 0                 | 4093              | 780              | 182              | 120              | 58                | 984              | 826              | 694               | 0                 | 356               | 0                 | 2    | 91                |     |
| 2006 | 8707             | 4763             | 228              | 1756             | 807              | 337              | 54               | 419              | 1161             | 0                 | 3944              | 732              | 180              | 119              | 55                | 946              | 813              | 656               | 0                 | 349               | 0                 | 2    | 93                |     |
| 2007 | 8691             | 4768             | 225              | 1748             | 795              | 331              | 55               | 443              | 1170             | 0                 | 3923              | 714              | 184              | 123              | 53                | 937              | 826              | 637               | 1                 | 351               | 0                 | 2    | 97                |     |
| 2008 | 8638             | 4774             | 221              | 1743             | 783              | 330              | 49               | 466              | 1181             | 0                 | 3864              | 689              | 188              | 125              | 50                | 916              | 833              | 612               | 0                 | 346               | 0                 | 2    | 103               |     |
| 2009 | 8504             | 4671             | 214              | 1700             | 754              | 317              | 49               | 475              | 1162             | 0                 | 3833              | 670              | 192              | 128              | 48                | 903              | 836              | 606               | 0                 | 342               | 0                 | 2    | 106               |     |
| 2010 | 8078             | 4456             | 202              | 1618             | 709              | 293              | 50               | 468              | 1116             | 0                 | 3622              | 604              | 177              | 118              | 43                | 857              | 778              | 626               | 0                 | 311               | 0                 | 2    | 107               |     |
| 2011 | 7832             | 4239             | 192              | 1535             | 665              | 271              | 50               | 459              | 1067             | 0                 | 3593              | 531              | 146              | 100              | 37                | 824              | 694              | 724               | 0                 | 425               | 0                 | 2    | 111               |     |
| 2012 | 7999             | 3893             | 175              | 1406             | 603              | 243              | 46               | 433              | 986              | 0                 | 4106              | 440              | 99               | 72               | 29                | 748              | 574              | 858               | 0                 | 1158              | 0                 | 2    | 126               |     |
| 2013 | 7188             | 3549             | 160              | 1278             | 544              | 218              | 42               | 404              | 903              | 0                 | 3639              | 354              | 75               | 54               | 23                | 666              | 470              | 895               | 0                 | 988               | 0                 | 2    | 112               |     |
| 2014 | 6333             | 3205             | 144              | 1151             | 487              | 193              | 38               | 374              | 818              | 0                 | 3128              | 304              | 64               | 46               | 19                | 602              | 412              | 878               | 0                 | 698               | 0                 | 2    | 103               |     |
| 2015 | 5515             | 2966             | 133              | 1062             | 448              | 175              | 35               | 353              | 759              | 0                 | 2549              | 294              | 63               | 46               | 18                | 587              | 408              | 874               | 0                 | 156               | 0                 | 2    | 101               |     |
| 2000 | 55723            | 28392            | 565              | 12253            | 3567             | 2188             | 0                | 3671             | 6149             | 0                 | 27331             | 3924             | 1116             | 455              | 390               | 11442            | 7634             | 539               | 0                 | 1827              | 0                 | 4    | 0                 |     |
| 2001 | 51562            | 26547            | 524              | 11386            | 3280             | 2060             | 0                | 3448             | 5849             | 0                 | 25015             | 3467             | 1050             | 428              | 356               | 10497            | 7078             | 456               | 0                 | 1679              | 0                 | 4    | 0                 |     |
| 2002 | 47335            | 24687            | 484              | 10521            | 2999             | 1929             | 0                | 3220             | 5534             | 0                 | 22648             | 3029             | 979              | 399              | 320               | 9520             | 6489             | 383               | 0                 | 1525              | 0                 | 3    | 0                 |     |
| 2003 | 43147            | 22516            | 438              | 9531             | 2689             | 1772             | 0                | 2949             | 5137             | 0                 | 20631             | 2662             | 920              | 375              | 290               | 8682             | 5982             | 324               | 0                 | 1393              | 0                 | 3    | 0                 |     |
| 2004 | 39252            | 20453            | 395              | 8598             | 2401             | 1620             | 0                | 2690             | 4750             | 0                 | 18799             | 2339             | 867              | 354              | 262               | 7915             | 5513             | 274               | 0                 | 1271              | 0                 | 3    | 0                 |     |
| 2005 | 36060            | 18703            | 358              | 7805             | 2158             | 1491             | 0                | 2469             | 4422             | 0                 | 17357             | 2082             | 831              | 339              | 240               | 7307             | 5145             | 235               | 0                 | 1174              | 0                 | 3    | 0                 |     |
| 2006 | 33110            | 17255            | 327              | 7146             | 1957             | 1384             | 0                | 2286             | 4155             | 0                 | 15855             | 1833             | 789              | 322              | 217               | 6670             | 4748             | 200               | 0                 | 1072              | 0                 | 3    | 0                 |     |
| 2007 | 30629            | 16041            | 302              | 6591             | 1787             | 1294             | 0                | 2132             | 3934             | 0                 | 14588             | 1624             | 756              | 309              | 198               | 6128             | 4410             | 172               | 0                 | 985               | 2                 | 3    | 0                 |     |
| 2008 | 28465            | 14927            | 278              | 6083             | 1634             | 1211             | 0                | 1991             | 3730             | 0                 | 13538             | 1451             | 733              | 299              | 181               | 5672             | 4128             | 149               | 0                 | 912               | 10                | 3    | 0                 |     |
| 2009 | 26598            | 13900            | 257              | 5617             | 1495             | 1134             | 0                | 1859             | 3539             | 0                 | 12698             | 1310             | 721              | 294              | 168               | 5308             | 3907             | 131               | 0                 | 853               | 2                 | 3    | 0                 |     |
| 2010 | 24984            | 13195            | 174              | 5495             | 1144             | 896              | 0                | 1630             | 3855             | 0                 | 11789             | 856              | 716              | 218              | 147               | 4387             | 4294             | 75                | 0                 | 1090              | 0                 | 8    | 0                 |     |
| 2011 | 23691            | 12381            | 181              | 4702             | 963              | 825              | 0                | 1605             | 4106             | 0                 | 11310             | 736              | 607              | 222              | 126               | 4289             | 4302             | 144               | 0                 | 881               | 0                 | 3    | 0                 |     |
| 2012 | 22468            | 11871            | 125              | 4838             | 922              | 774              | 0                | 1791             | 3420             | 0                 | 10597             | 558              | 758              | 265              | 143               | 4186             | 3642             | 204               | 0                 | 840               | 0                 | 2    | 0                 |     |
| 2013 | 21428            | 11307            | 165              | 4919             | 871              | 745              | 0                | 1269             | 3339             | 0                 | 10121             | 770              | 785              | 259              | 115               | 3377             | 3499             | 222               | 3                 | 1091              | 0                 | 0    | 0                 |     |
| 2014 | 20135            | 10593            | 155              | 4608             | 816              | 698              | 0                | 1188             | 3128             | 0                 | 9542              | 617              | 645              | 223              | 114               | 3524             | 3402             | 171               | 1                 | 843               | 0                 | 1    | 0                 |     |
| 2015 | 18937            | 9980             | 146              | 4342             | 768              | 658              | 0                | 1120             | 2947             | 0                 | 8957              | 579              | 605              | 209              | 107               | 3308             | 3194             | 161               | 1                 | 791               | 0                 | 1    | 0                 |     |
| 2000 | 563              | 282              | 2                | 108              | 41               | 12               | 0                | 42               | 77               | 0                 | 281               | 29               | 34               | 10               | 5                 | 76               | 71               | 5                 | 0                 | 47                | 0                 | 0    | 5                 |     |
| 2001 | 544              | 273              | 1                | 106              | 39               | 12               | 0                | 39               | 75               | 0                 | 271               | 27               | 33               | 9                | 4                 | 73               | 68               | 4                 | 0                 | 47                | 0                 | 0    | 5                 |     |
| 2002 | 523              | 266              | 1                | 104              | 38               | 12               | 0                | 36               | 74               | 0                 | 257               | 25               | 31               | 9                | 4                 | 69               | 65               | 4                 | 0                 | 45                | 0                 | 0    | 5                 |     |
| 2003 | 514              | 260              | 1                | 103              | 37               | 12               | 0                | 34               | 73               | 0                 | 254               | 24               | 31               | 9                | 4                 | 68               | 64               | 4                 | 0                 | 45                | 0                 | 0    | 5                 |     |
| 2004 | 536              | 271              | 1                | 109              | 38               | 12               | 0                | 34               | 77               | 0                 | 265               | 24               | 32               | 9                | 4                 | 72               | 67               | 4                 | 0                 | 48                | 0                 | 0    | 5                 |     |
| 2005 | 583              | 299              | 1                | 121              | 42               | 13               | 0                | 36               | 86               | 0                 | 284               | 25               | 34               | 10               | 4                 | 77               | 72               | 4                 | 0                 | 51                | 0                 | 0    | 6                 |     |
| 2006 | 615              | 317              | 1                | 129              | 44               | 14               | 0                | 36               | 92               | 0                 | 298               | 26               | 36               | 10               | 4                 | 80               | 76               | 5                 | 0                 | 54                | 0                 | 0    | 7                 |     |
| 2007 | 674              | 341              | 2                | 140              | 47               | 15               | 0                | 38               | 100              | 0                 | 333               | 29               | 40               | 12               | 4                 | 90               | 85               | 5                 | 0                 | 60                | 0                 | 0    | 8                 |     |
| 2008 | 731              | 375              | 1                | 154              | 52               | 16               | 0                | 42               | 110              | 0                 | 356               | 30               | 44               | 13               | 5                 | 94               | 92               | 6                 | 0                 | 63                | 0                 | 0    | 10                |     |
| 2009 | 770              | 399              | 1                | 164              | 55               | 17               | 0                | 44               | 118              | 0                 | 371               | 31               | 47               | 14               | 5                 | 96               | 97               | 6                 | 0                 | 64                | 0                 | 0    | 11                |     |
| 2010 | 773              | 396              | 2                | 163              | 54               | 17               | 0                | 43               | 118              | 0                 | 377               | 31               | 49               | 15               | 4                 | 96               | 100              | 7                 | 0                 | 64                | 0                 | 0    | 12                |     |
| 2011 | 797              | 403              | 2                | 165              | 55               | 17               | 0                | 44               | 121              | 0                 | 394               | 32               | 52               | 16               | 5                 | 99               | 105              | 7                 | 0                 | 65                | 0                 | 0    | 13                |     |
| 2012 | 780              | 403              | 2                | 165              | 54               | 17               | 0                | 43               | 121              | 0                 | 377               | 30               | 51               | 16               | 4                 | 92               | 102              | 7                 | 0                 | 61                | 0                 | 0    | 14                |     |
| 2013 | 741              | 382              | 2                | 156              | 51               | 16               | 0                | 41               | 116              | 0                 | 359               | 28               | 50               | 16               | 4                 | 87               | 99               | 6                 | 0                 | 57                | 0                 | 0    | 13                |     |
| 2014 | 702              | 356              | 2                | 144              | 47               | 15               | 0                | 39               | 109              | 0                 | 346               | 26               | 49               | 15               | 3                 | 84               | 96               | 6                 | 0                 | 54                | 0                 | 0    | 13                |     |
| 2015 | 661              | 339              | 2                | 137              | 45               | 14               | 0                | 37               | 104              | 0                 | 322               | 24               | 47               | 15               | 3                 | 78               | 90               | 5                 | 0                 | 49                | 0                 | 0    | 12                |     |
| 2000 | 64859            | 24152            | 1764             | 8125             | 6004             | 4000             | 898              | 1650             | 1382             | 328               | 40707             | 12449            | 1175             | 344              | 1918              | 6169             | 1077             | 9277              | 3422              | 3337              | 750               | 17   | 773               |     |
| 2001 | 59716            | 23821            | 1748             | 7803             | 5993             | 4051             | 804              | 1661             | 1447             | 314               | 35895             | 11797            | 1115             | 326              | 1809              | 5842             | 1024             | 8403              | 795               | 3232              | 770               | 18   | 765               |     |
| 2002 | 57663            | 23810            | 1755             | 7622             | 6081             | 4088             | 722              | 1693             | 1546             | 303               | 33853             | 11240            | 1065             | 309              | 1715              | 5530             | 977              | 7647              | 543               | 3151              | 858               | 20   | 796               |     |
| 2003 | 57993            | 23965            | 1772             | 7622             | 6180             | 4042             | 676              | 1715             | 1658             | 298               | 34028             | 10864            | 1030             | 299              | 1653              | 5324             | 948              | 7062              | 2151              | 3116              | 741               | 22   | 818               |     |
| 2004 | 57675            | 24075            | 1781             | 7688             | 6223             | 3954             | 652              | 1716             | 1767             | 295               | 33600             | 10521            | 999              | 291              | 1598              | 5173             | 922              | 6533              | 3152              | 3087              | 500               | 24   | 801               |     |
| 2005 | 54774            | 24000            | 1768             | 7812             | 6173             | 3775             | 644              | 1681             | 1853             | 293               | 30774             | 9161             | 1031             | 299              | 1234              | 5372             | 955              | 6425              | 1763              | 3245              | 464               | 24   | 801               |     |
| 2006 | 53156            | 23641            | 1731             | 7794             | 6052             | 3607             | 609              | 1640             | 1923             | 285               | 29515             | 8206             | 1017             | 298              | 999               | 5320             | 946              | 6062              | 2006              | 3275              | 562               | 2    |                   |     |

Webappendix 7. Global CSMFs in 2000-2015

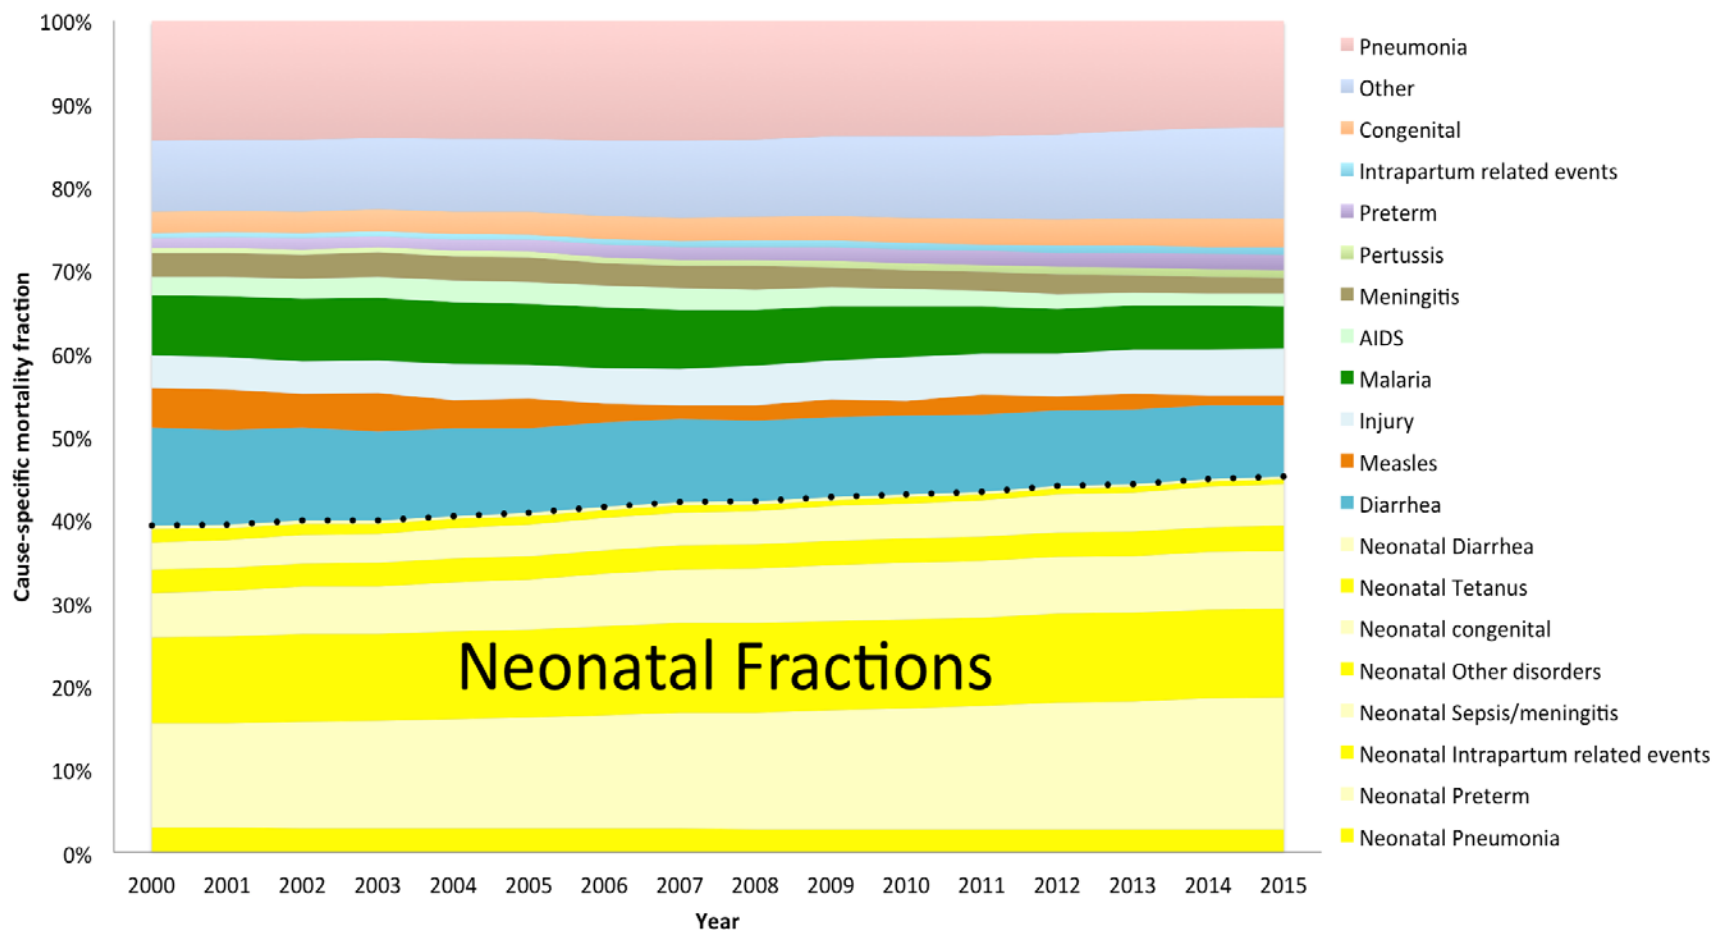



## Webappendix 8. Global cause-specific average annual rate of reduction in 2000-2015

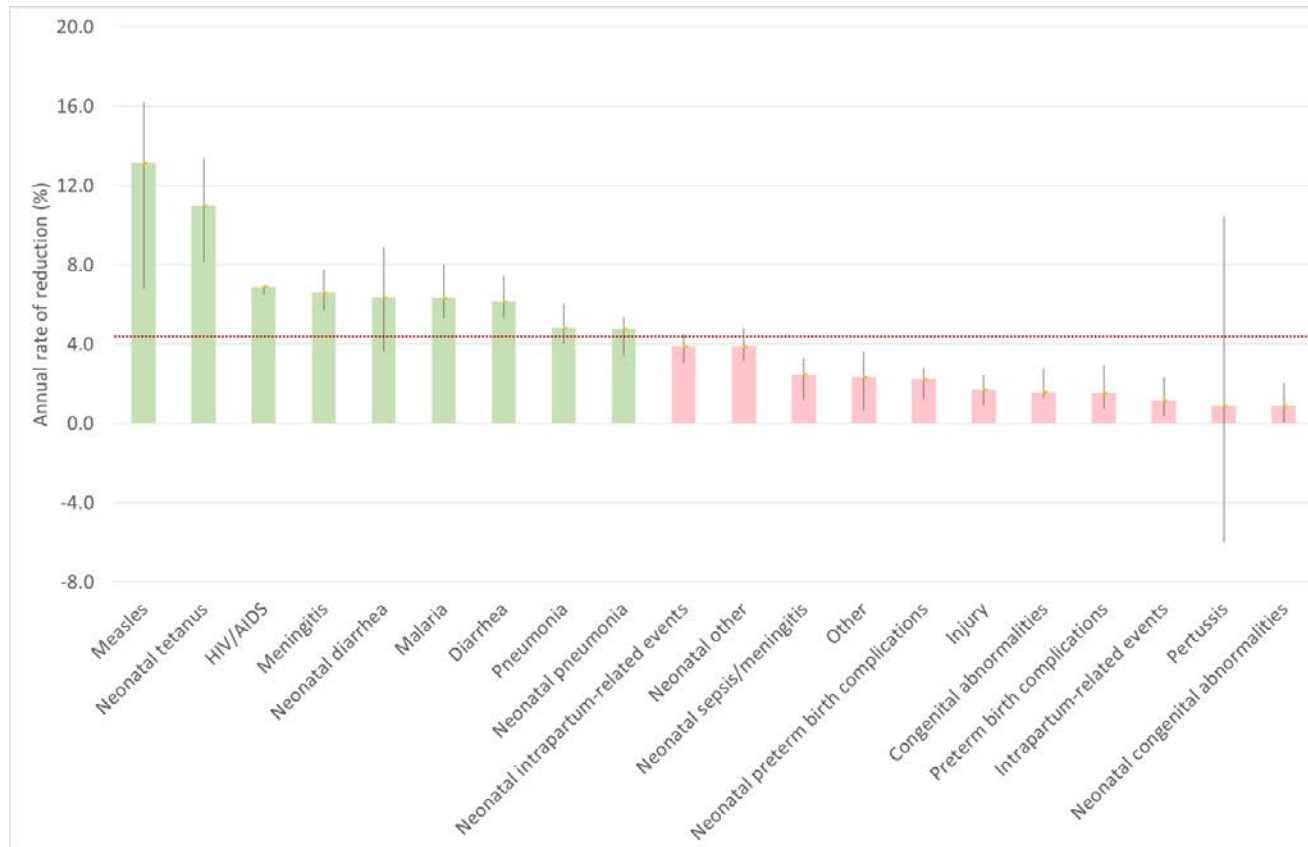

Green bars represent causes that have been declining at an average annual rate of reduction (ARR) of at least 4.4% since 2000; Red bars represent the remaining causes; The dotted line represents an ARR of 4.4%.

Webappendix 9. Trends in cause-specific mortality rates in neonates and children aged 1–59 months by the MDG regions, 2000–2015

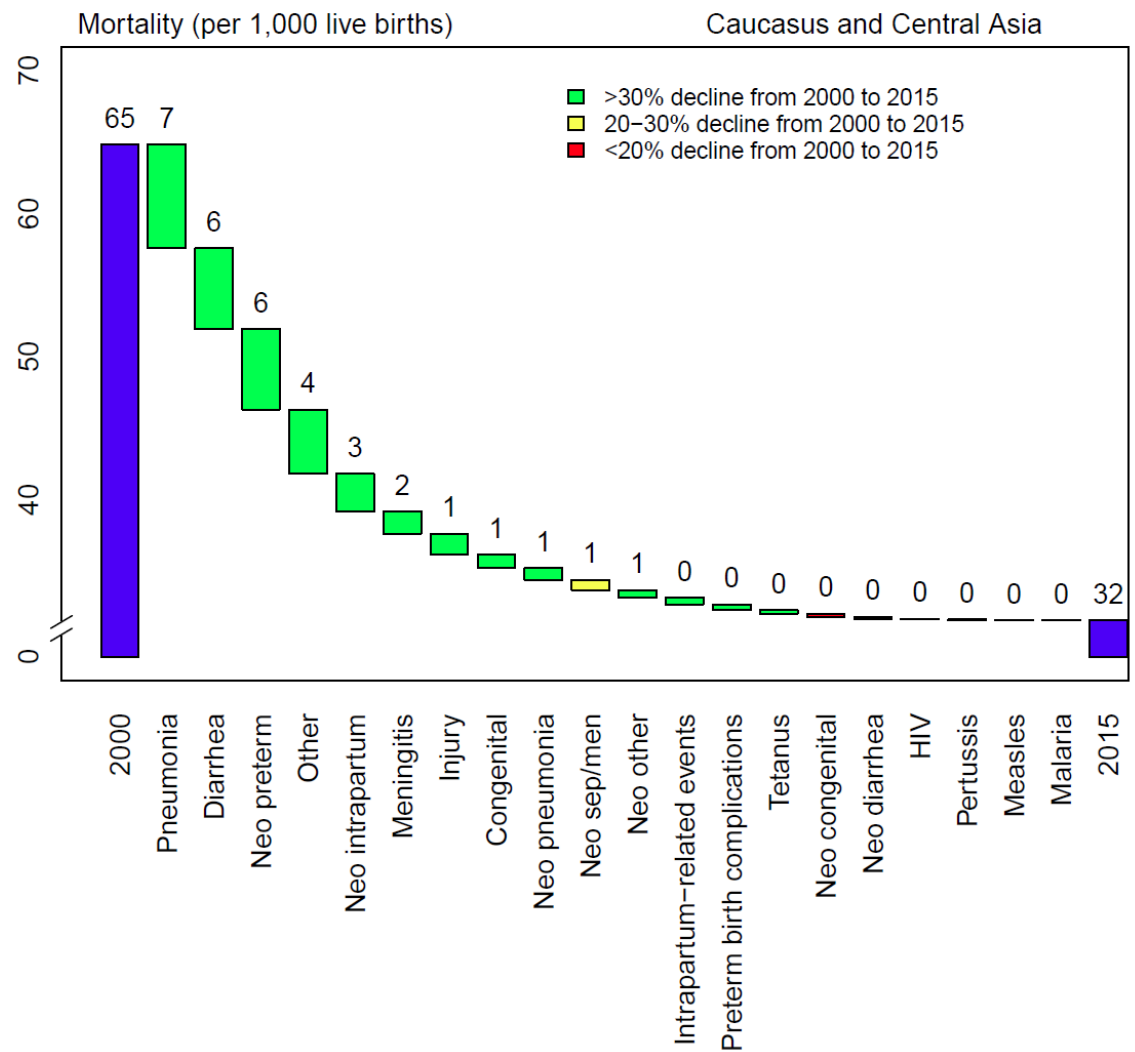

Mortality (per 1,000 live births)

Developed region

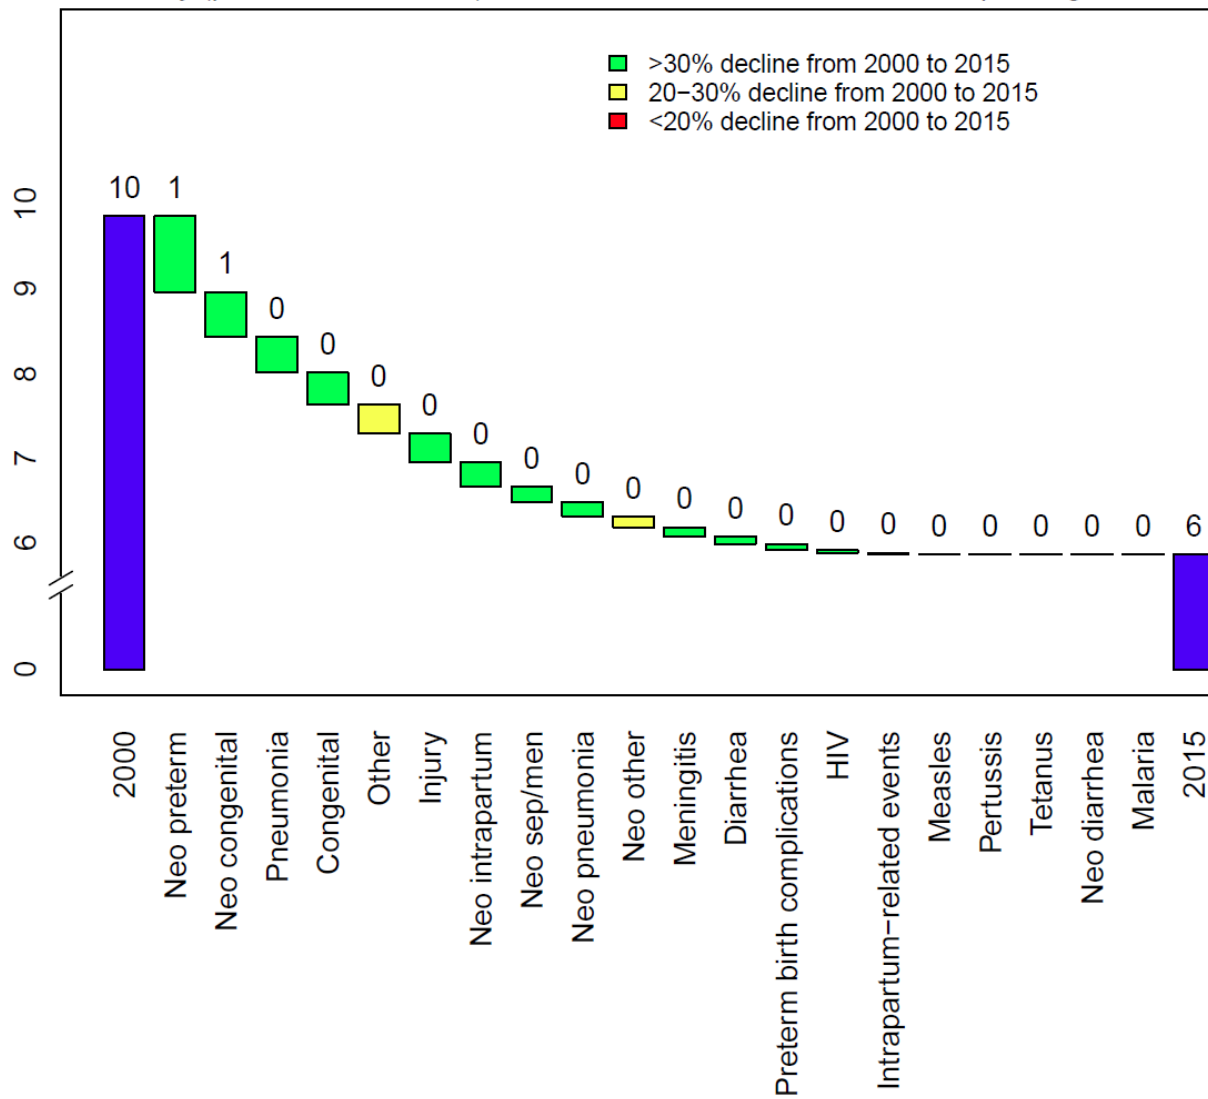

Mortality (per 1,000 live births)

Eastern Asia

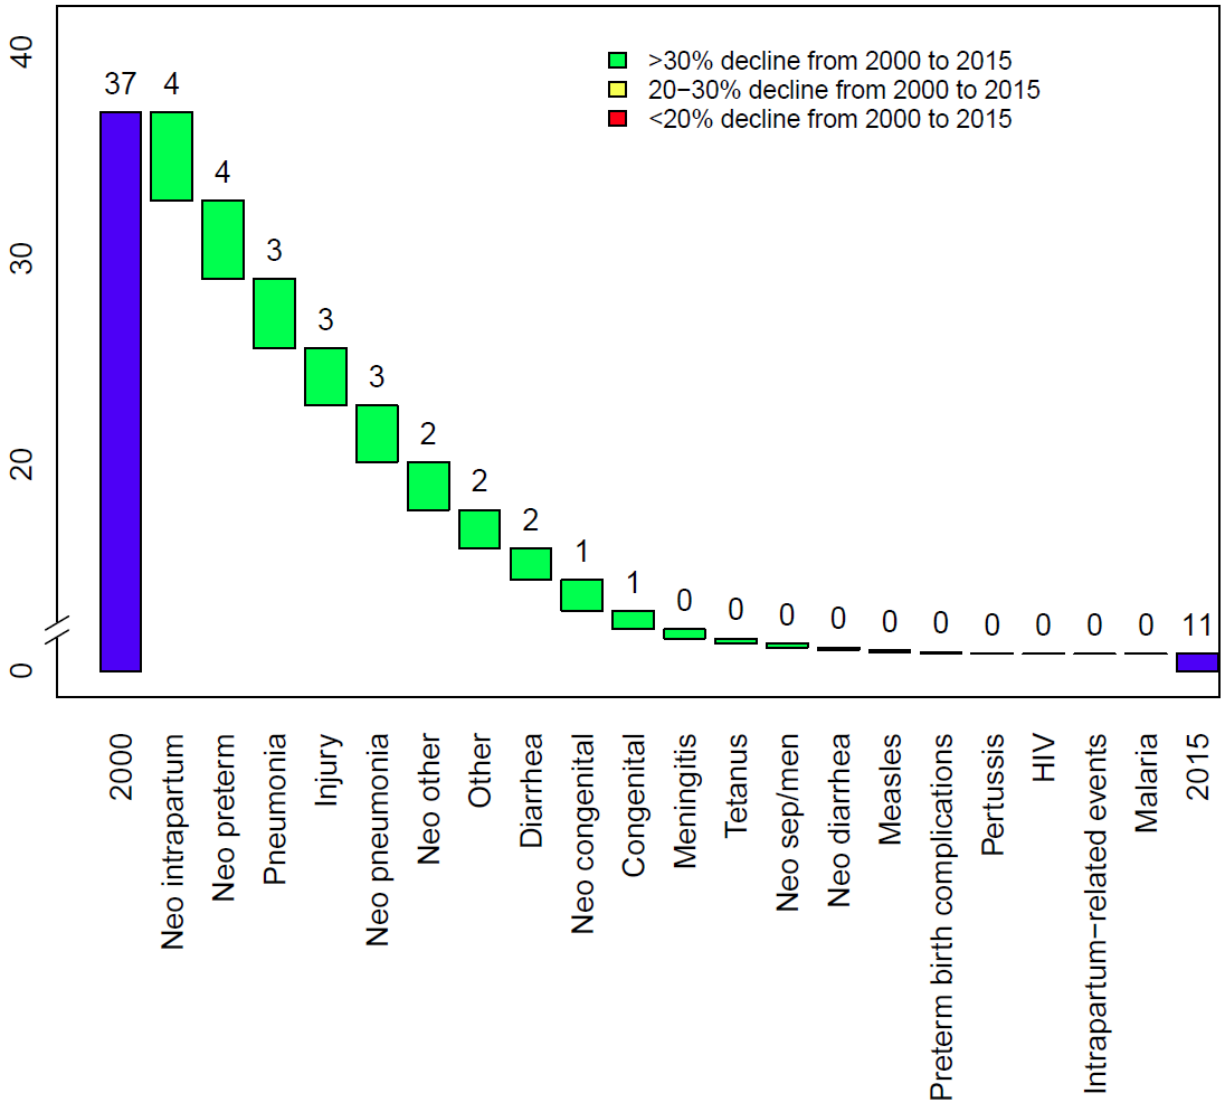

Mortality (per 1,000 live births)

Latin America and the Caribbean

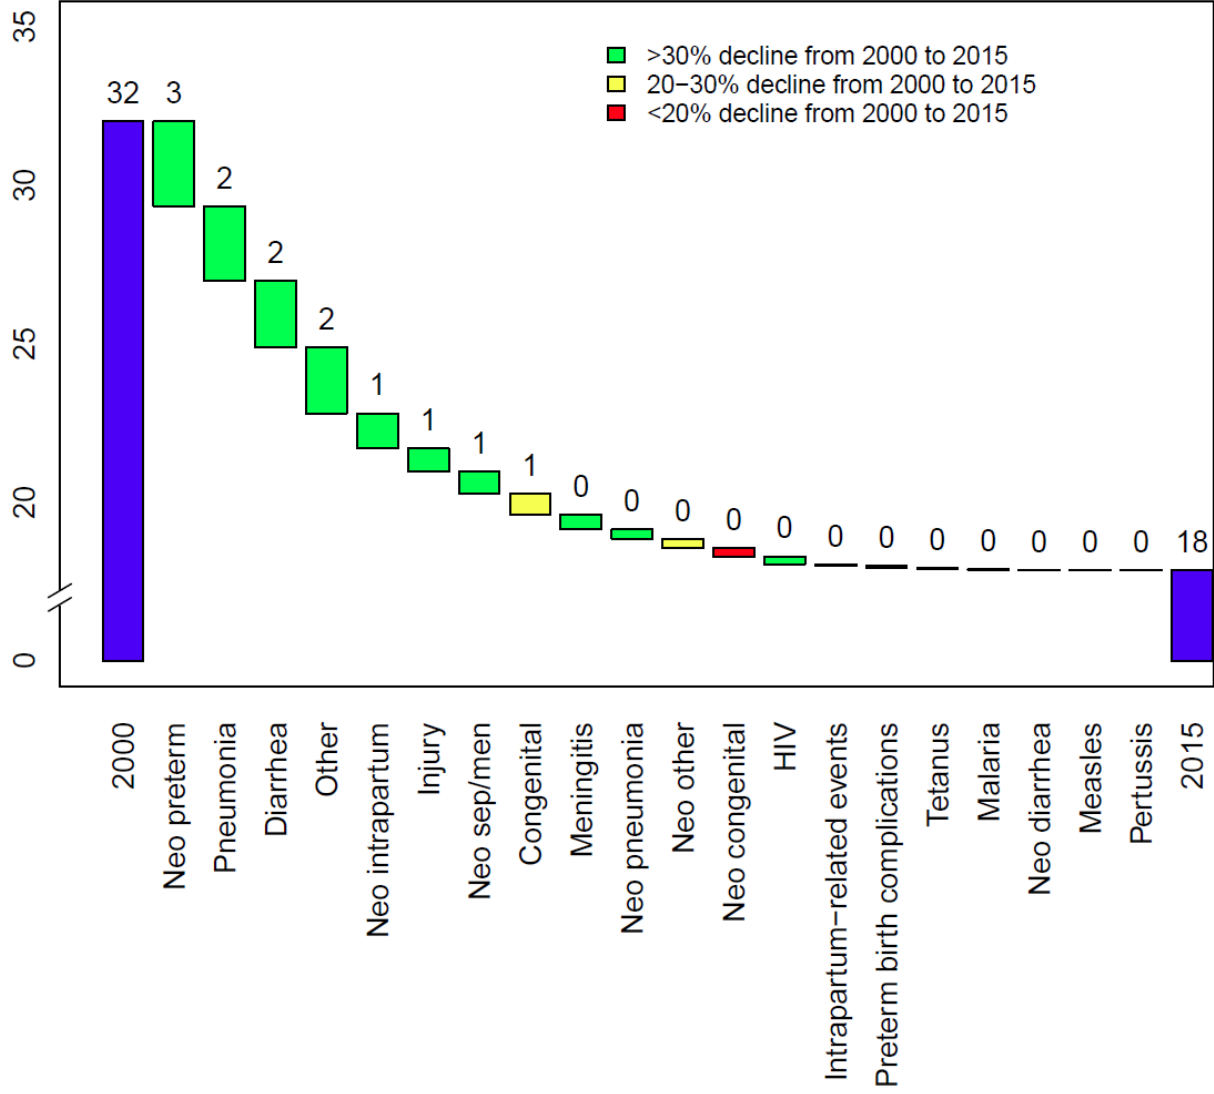



Mortality (per 1,000 live births)

Northern Africa

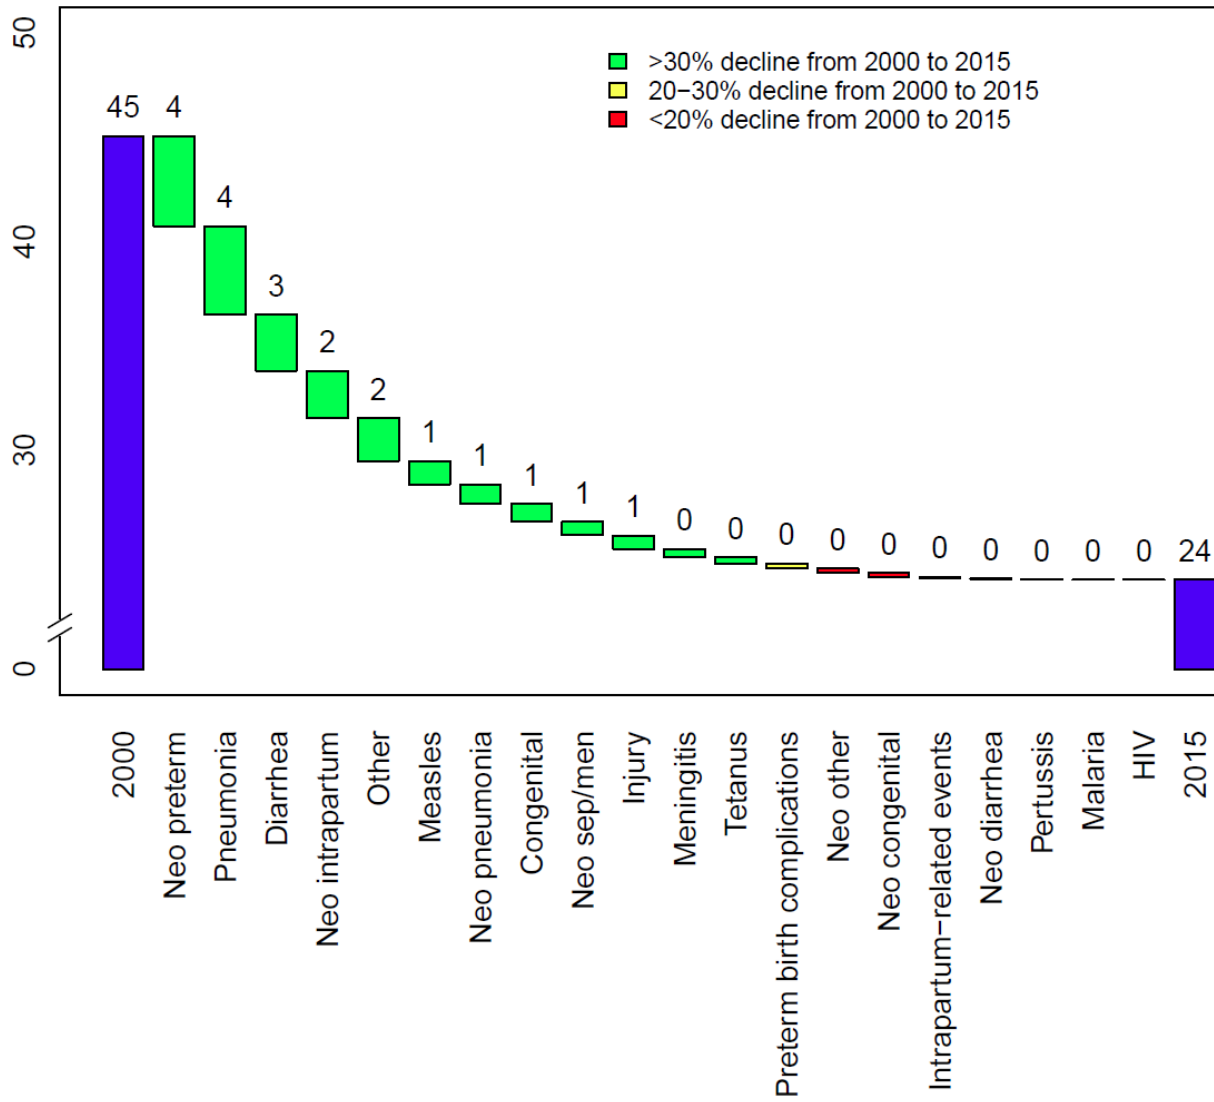

Mortality (per 1,000 live births)

Oceania

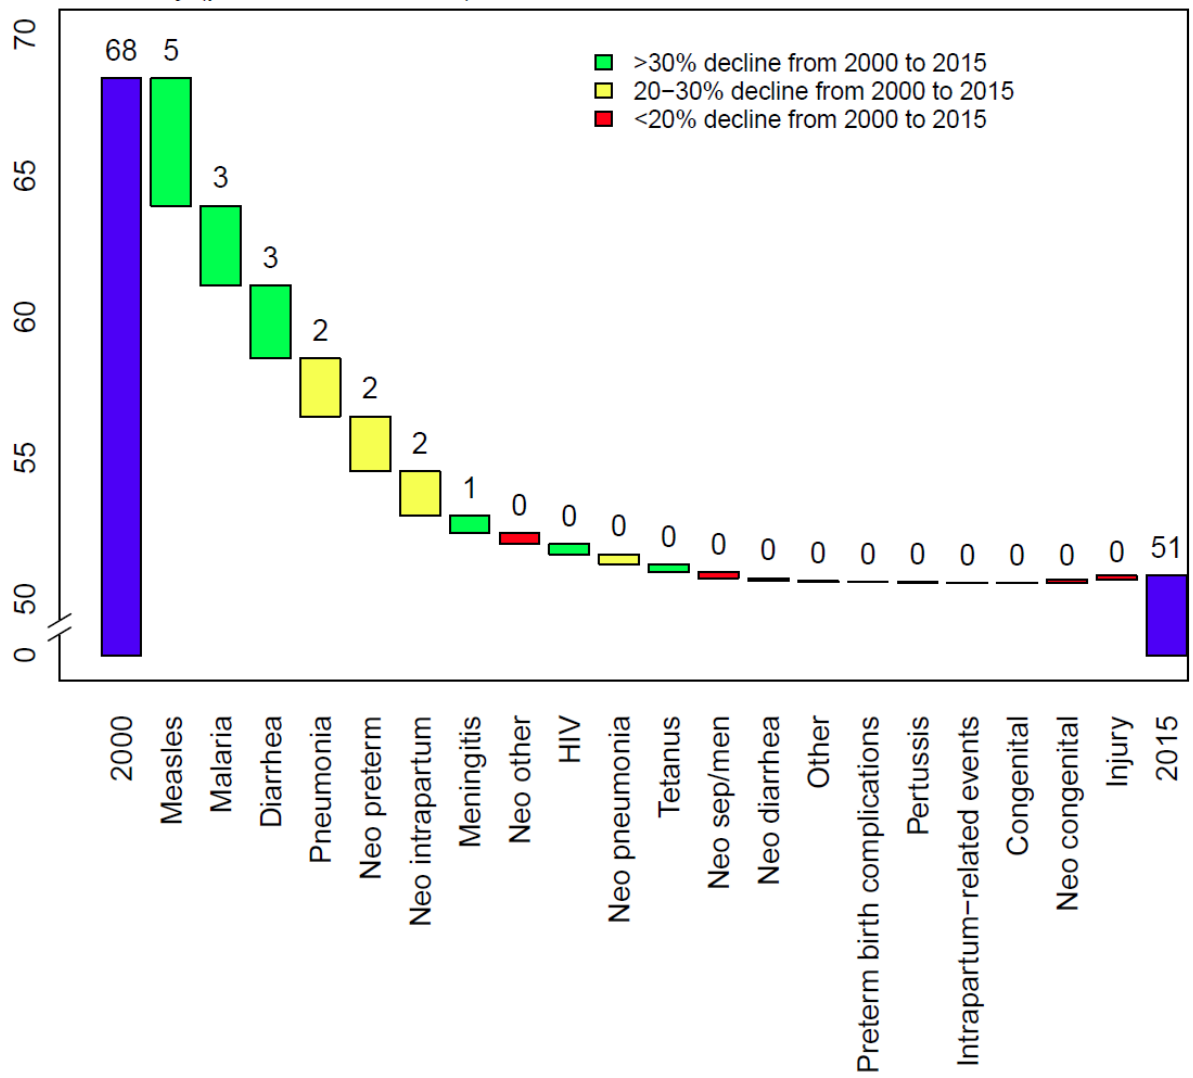

Mortality (per 1,000 live births)

Southern Asia

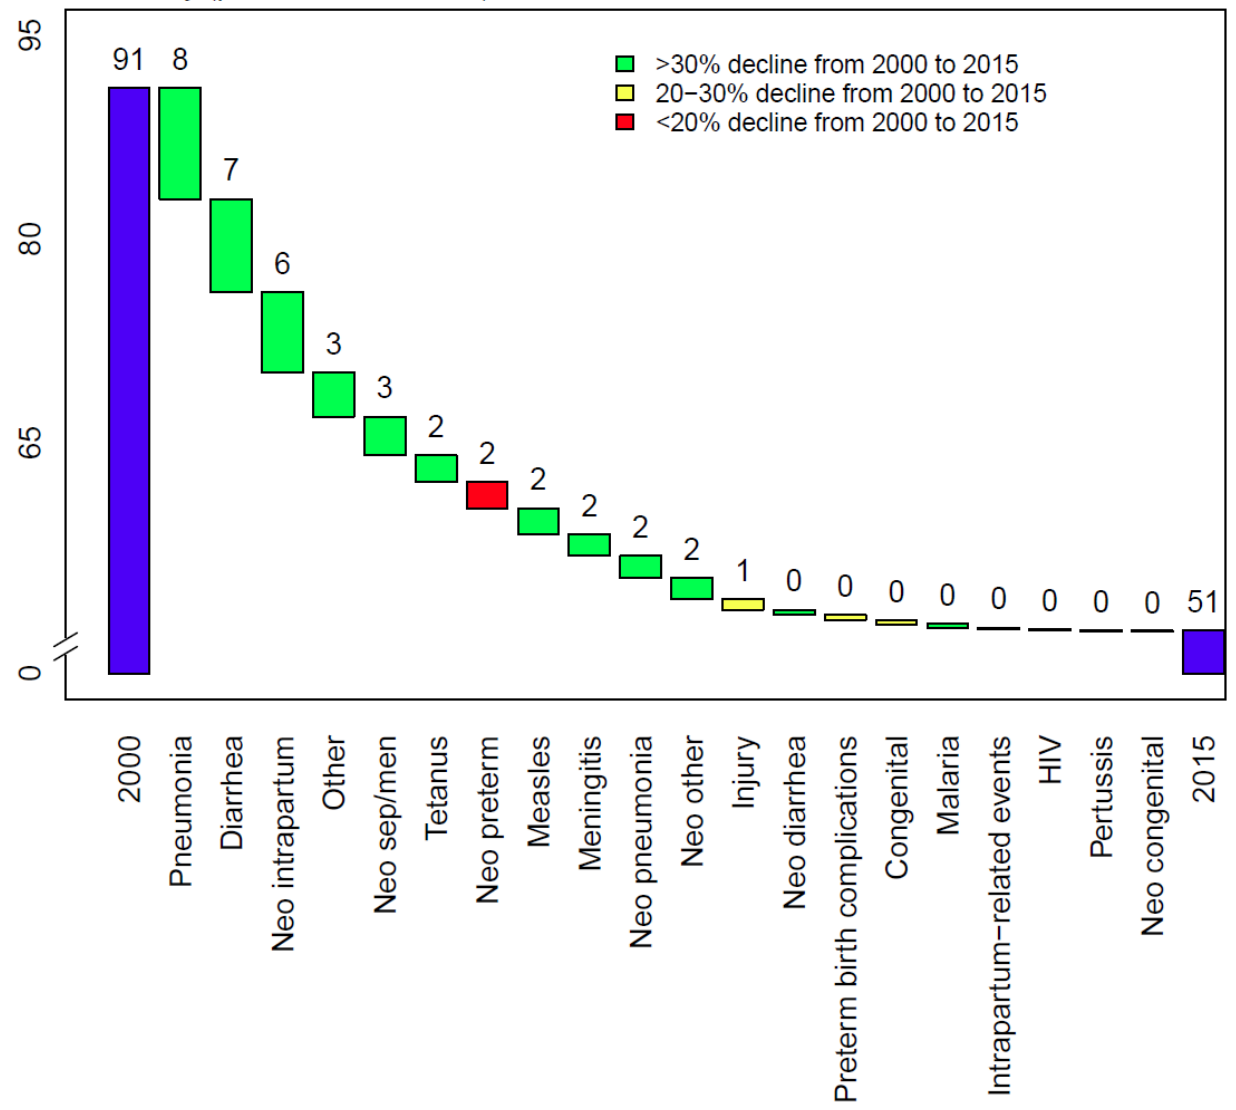

Mortality (per 1,000 live births)

South-eastern Asia

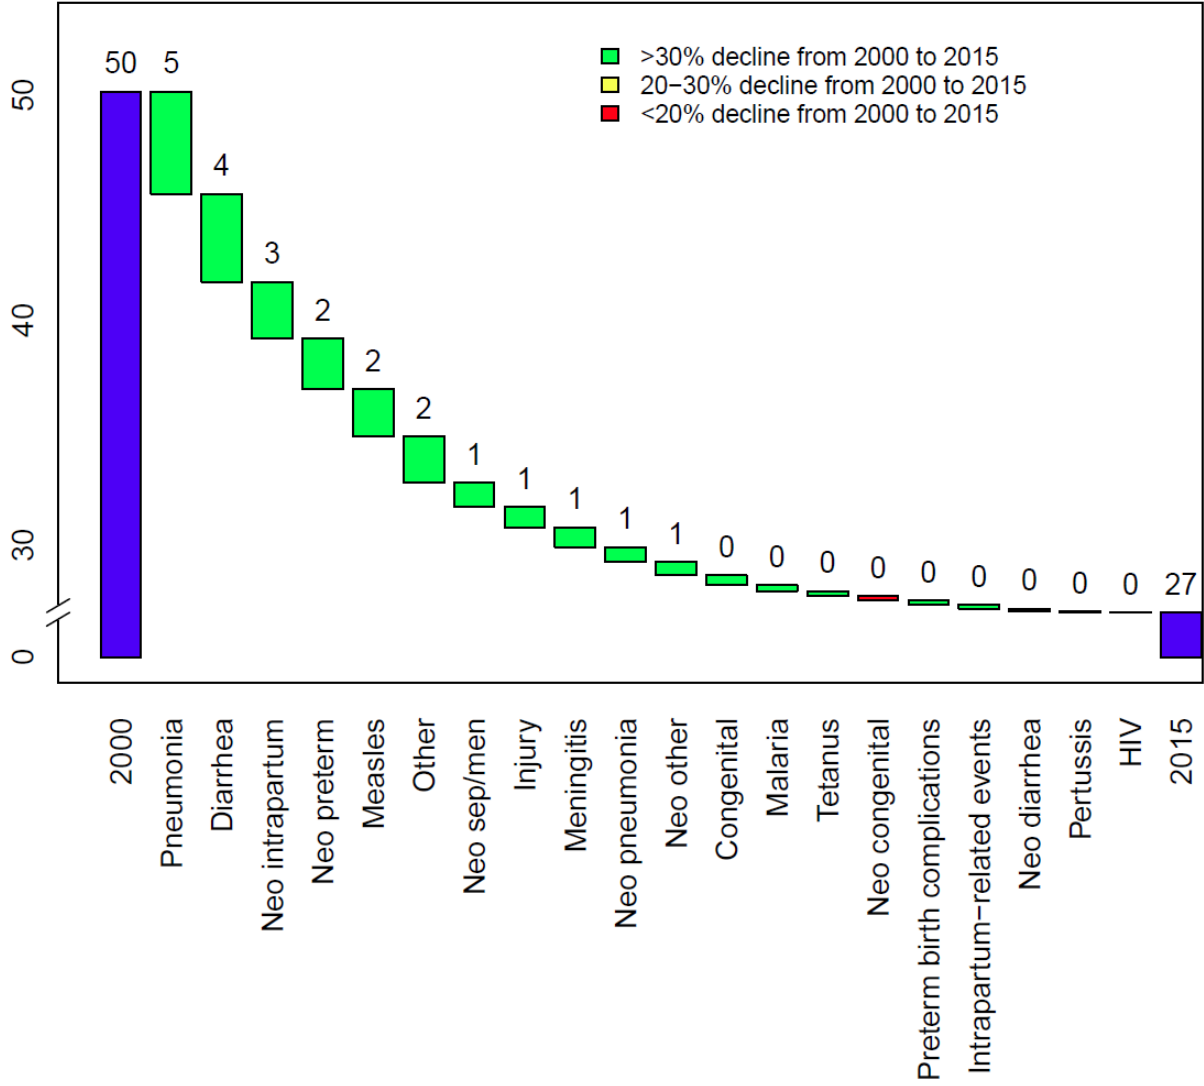

Mortality (per 1,000 live births)

Sub-Saharan Africa

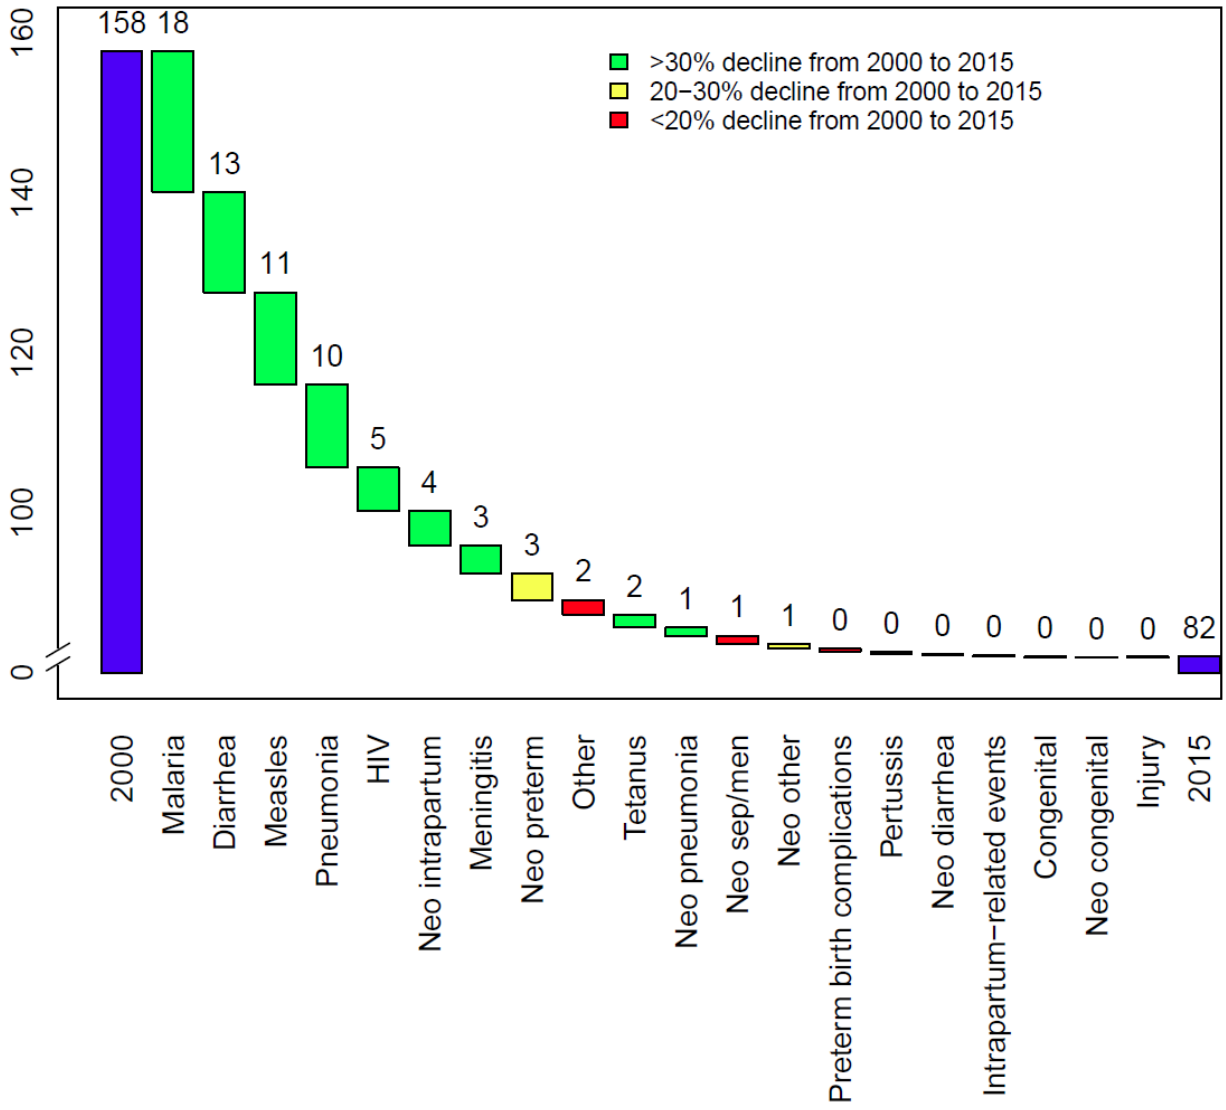



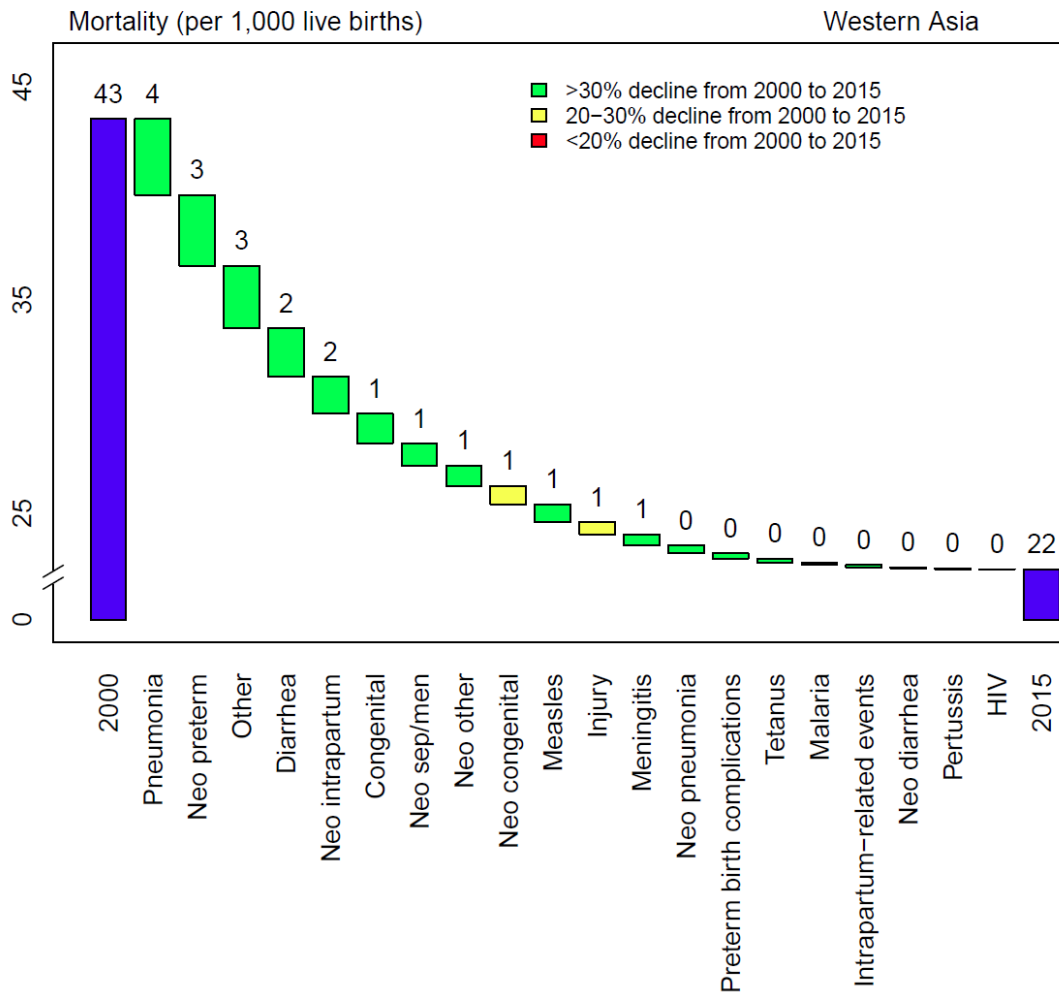

\*Neo means neonatal, sep/men means sepsis/meningitis. Causes not specified as neonatal deaths refers to those of 1-59 months.

## Webappendix 10. CSMFs by the MDG regions, 2000-2015

### Caucasus and Central Asia

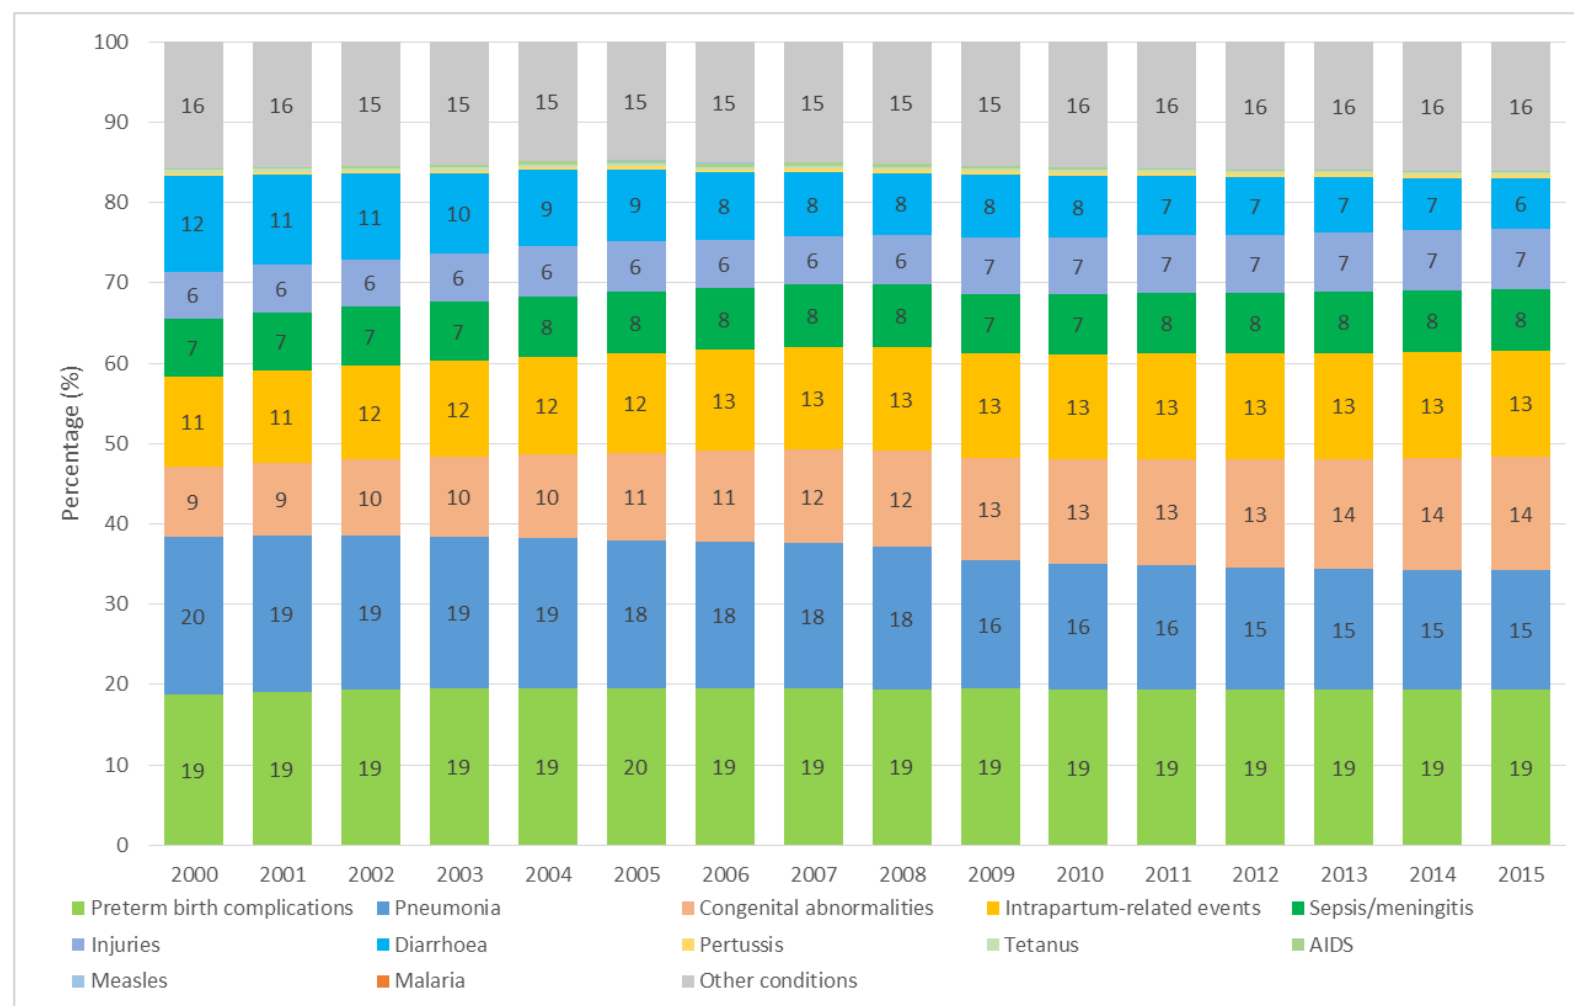

## Developed regions

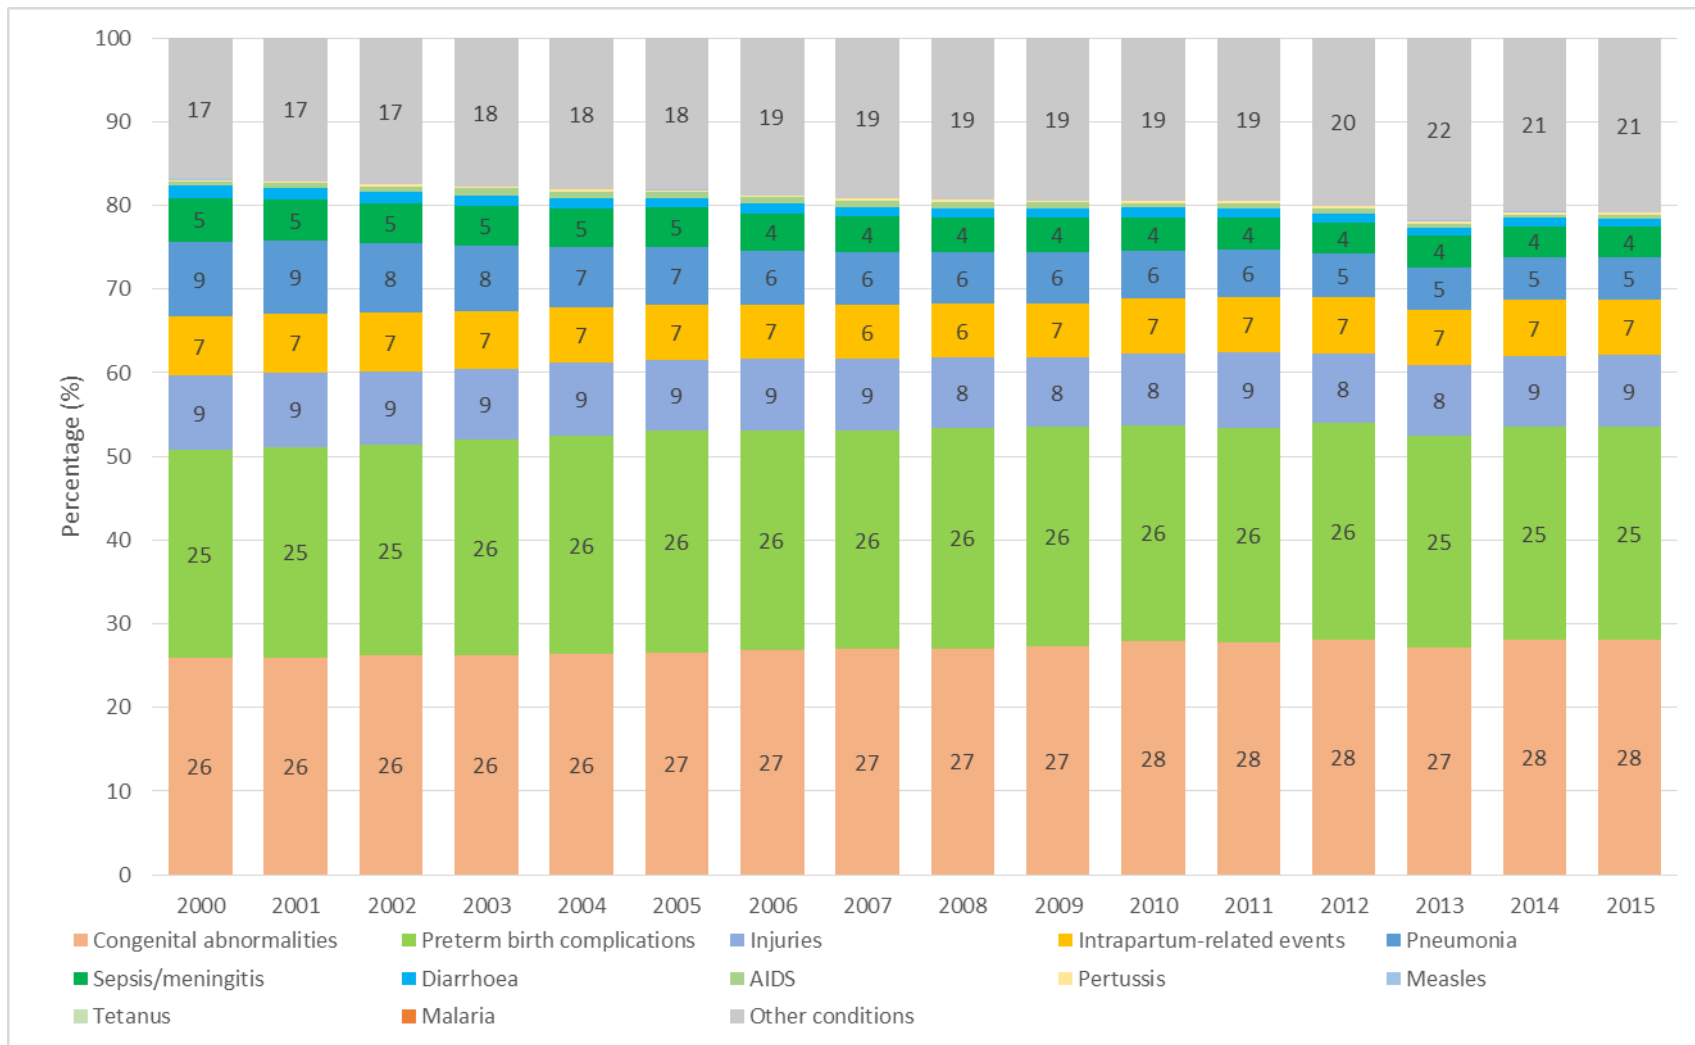

## Eastern Asia

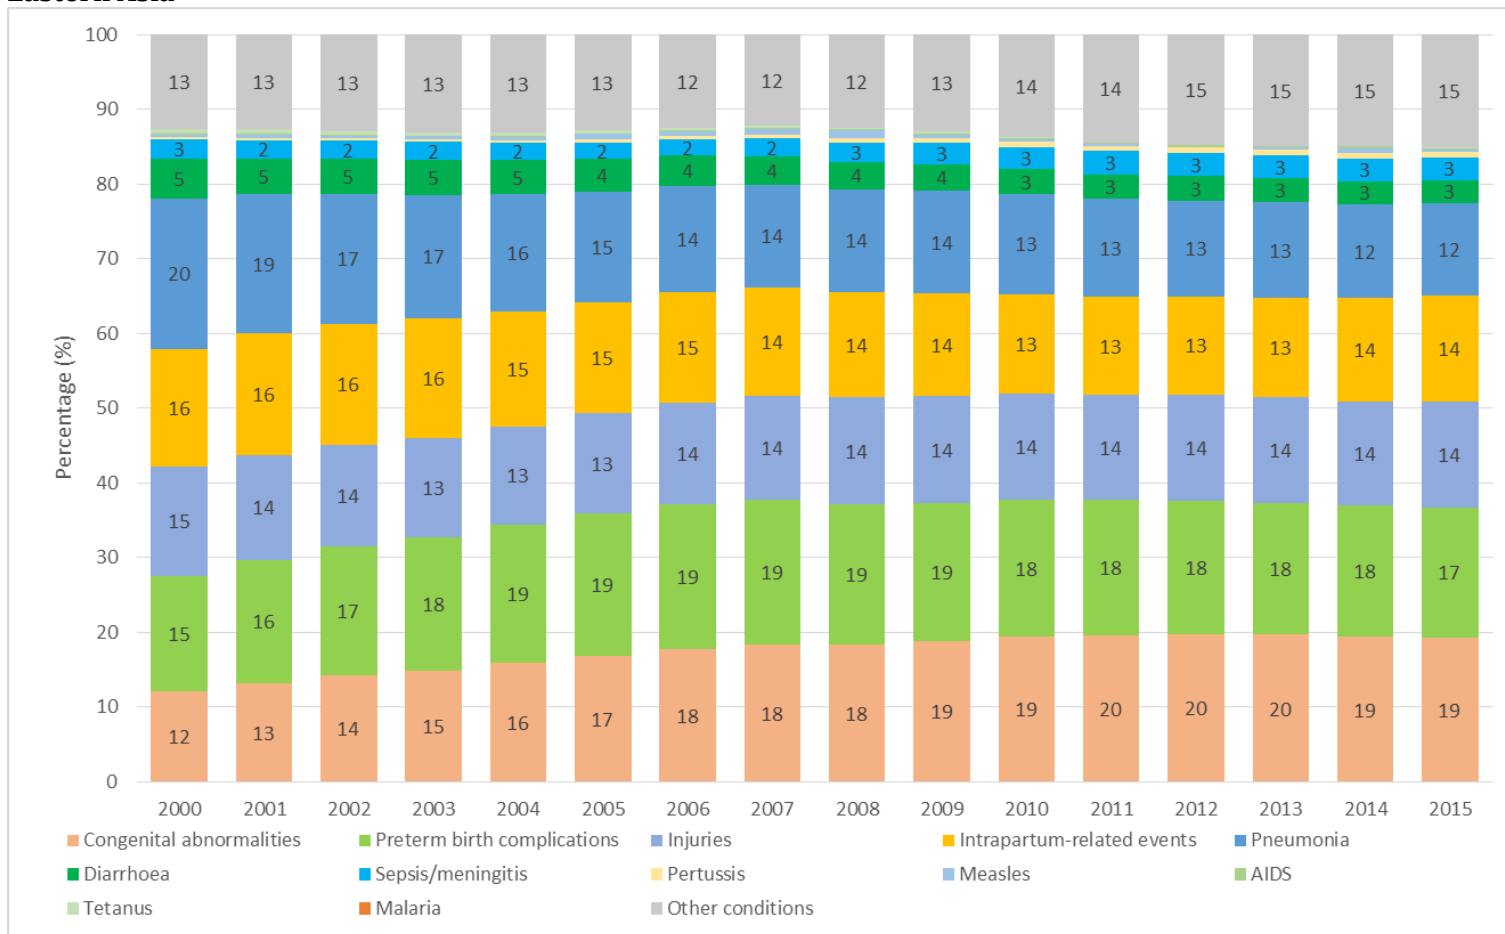

## Latin America and the Caribbean

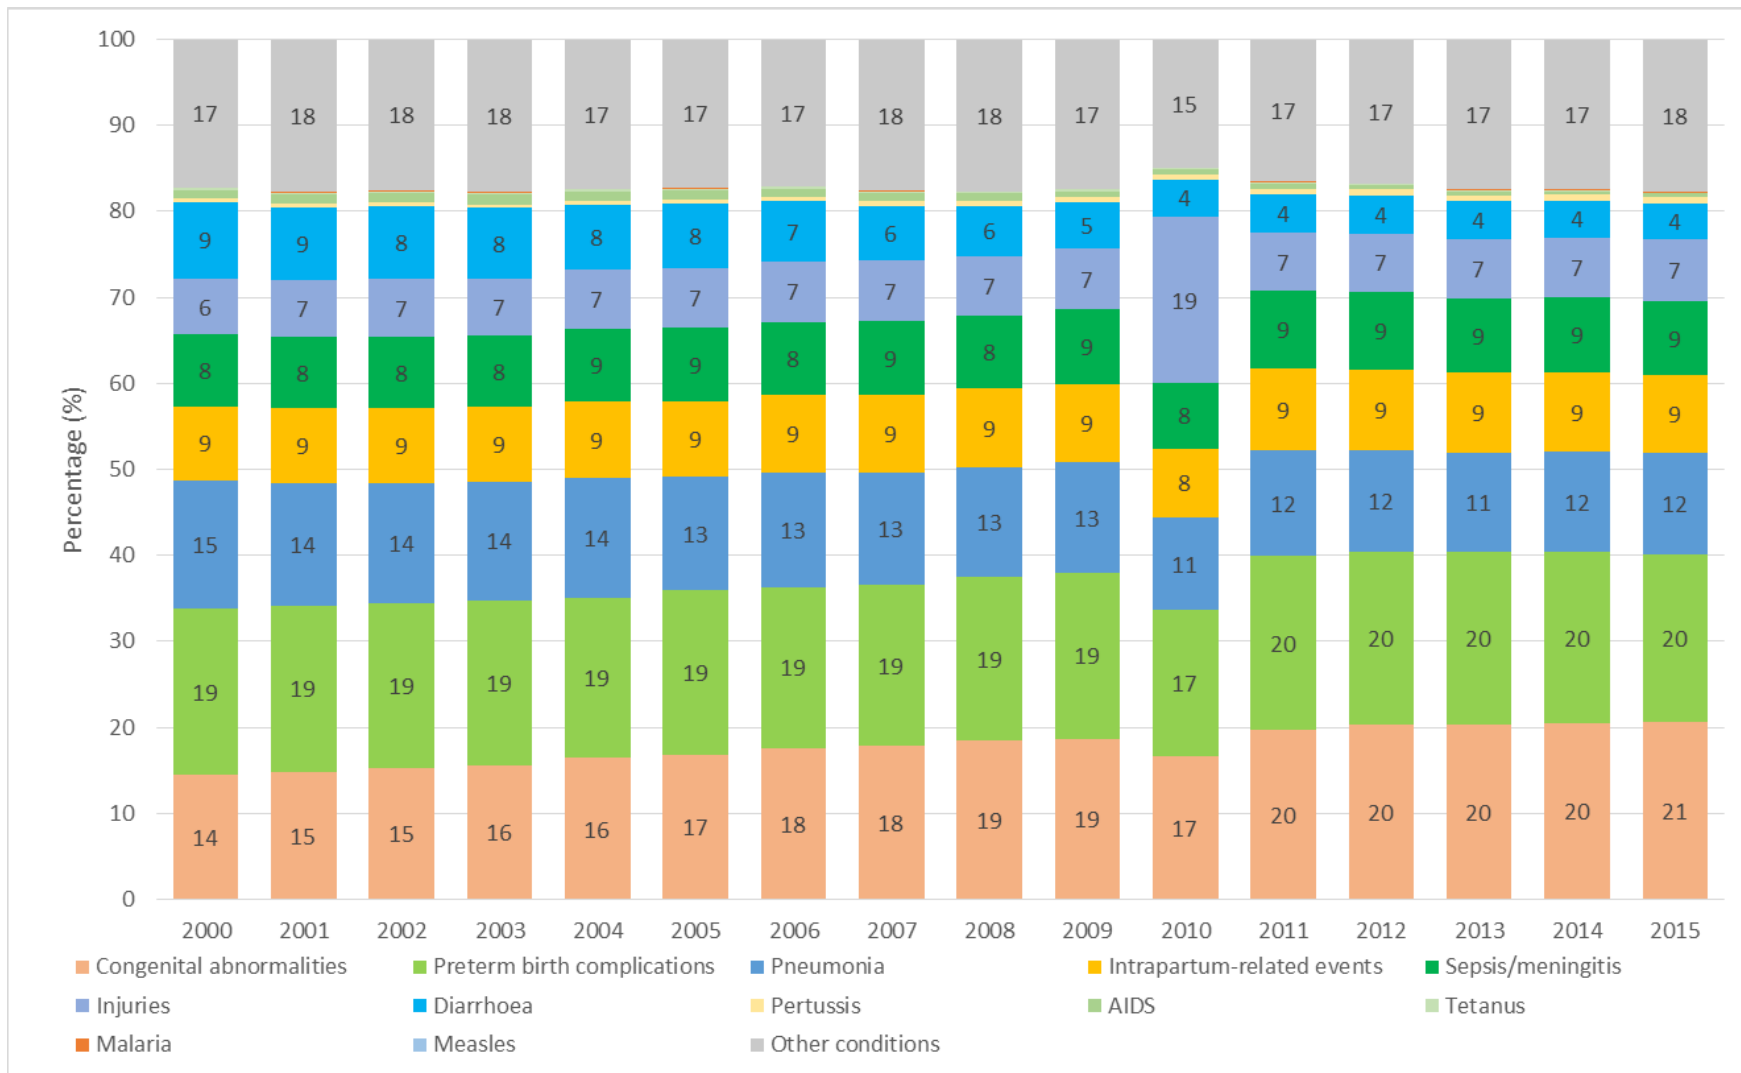

## Northern Africa

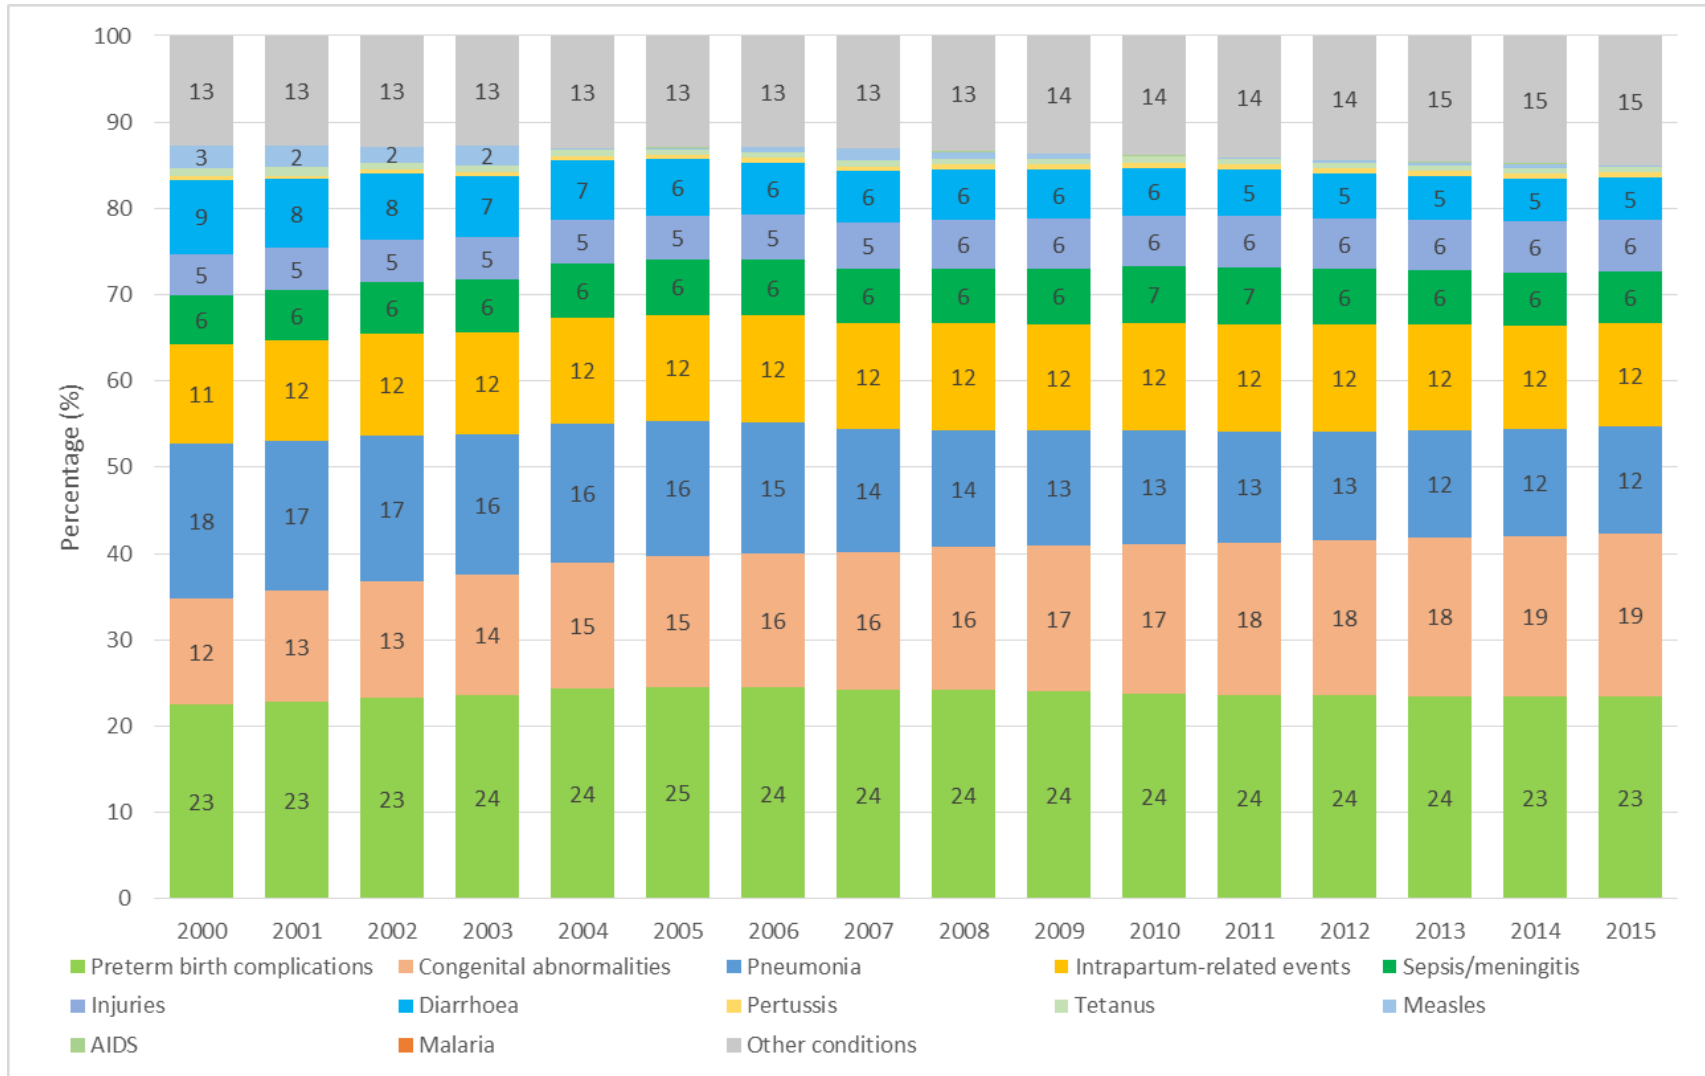



## Oceania

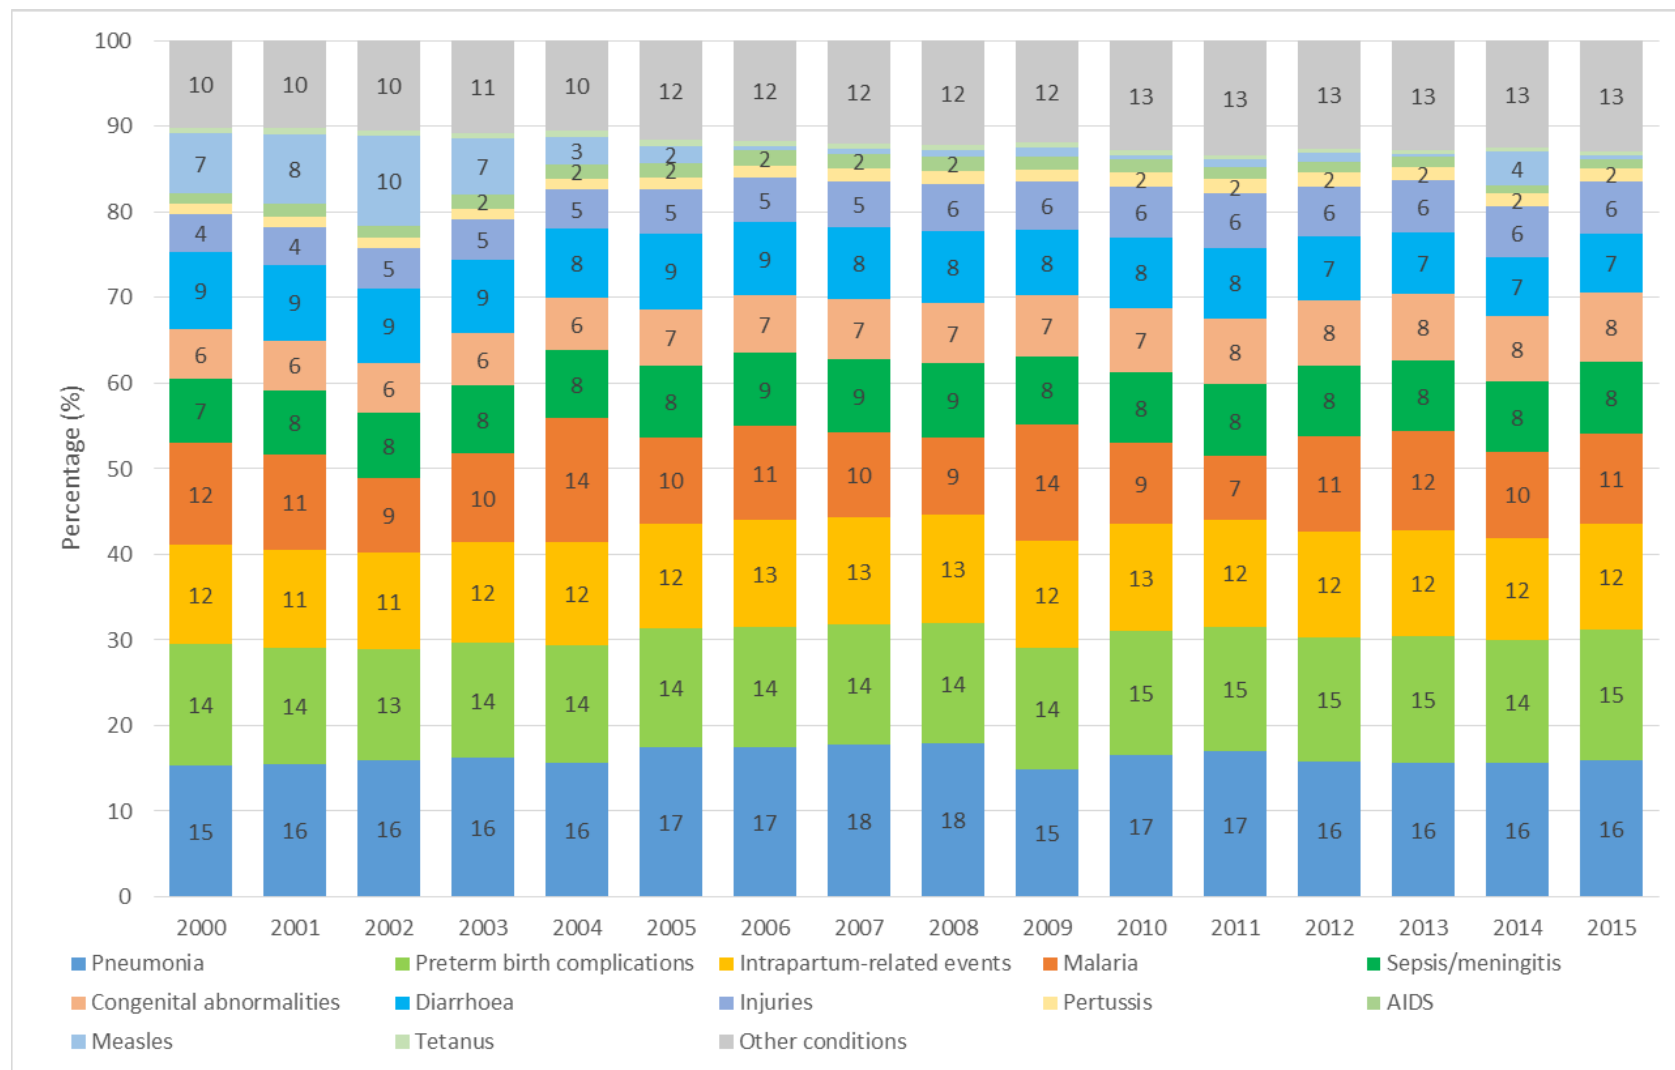

## South-eastern Asia

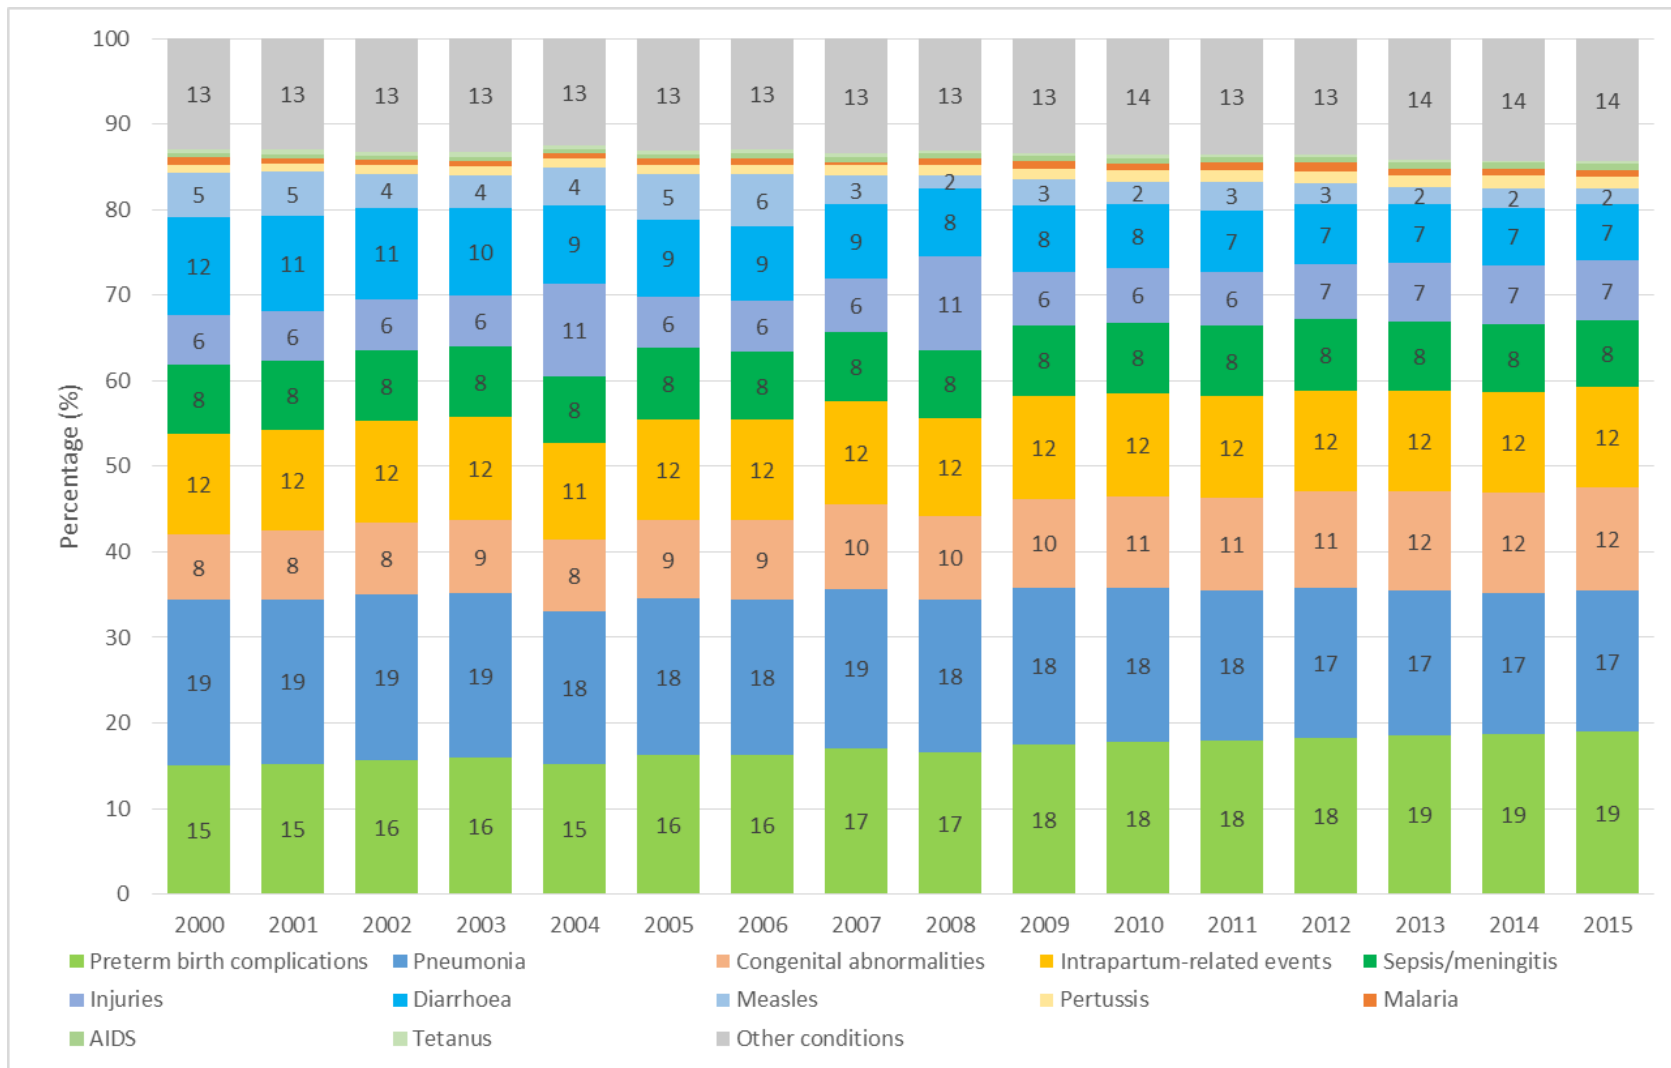

## Southern Asia

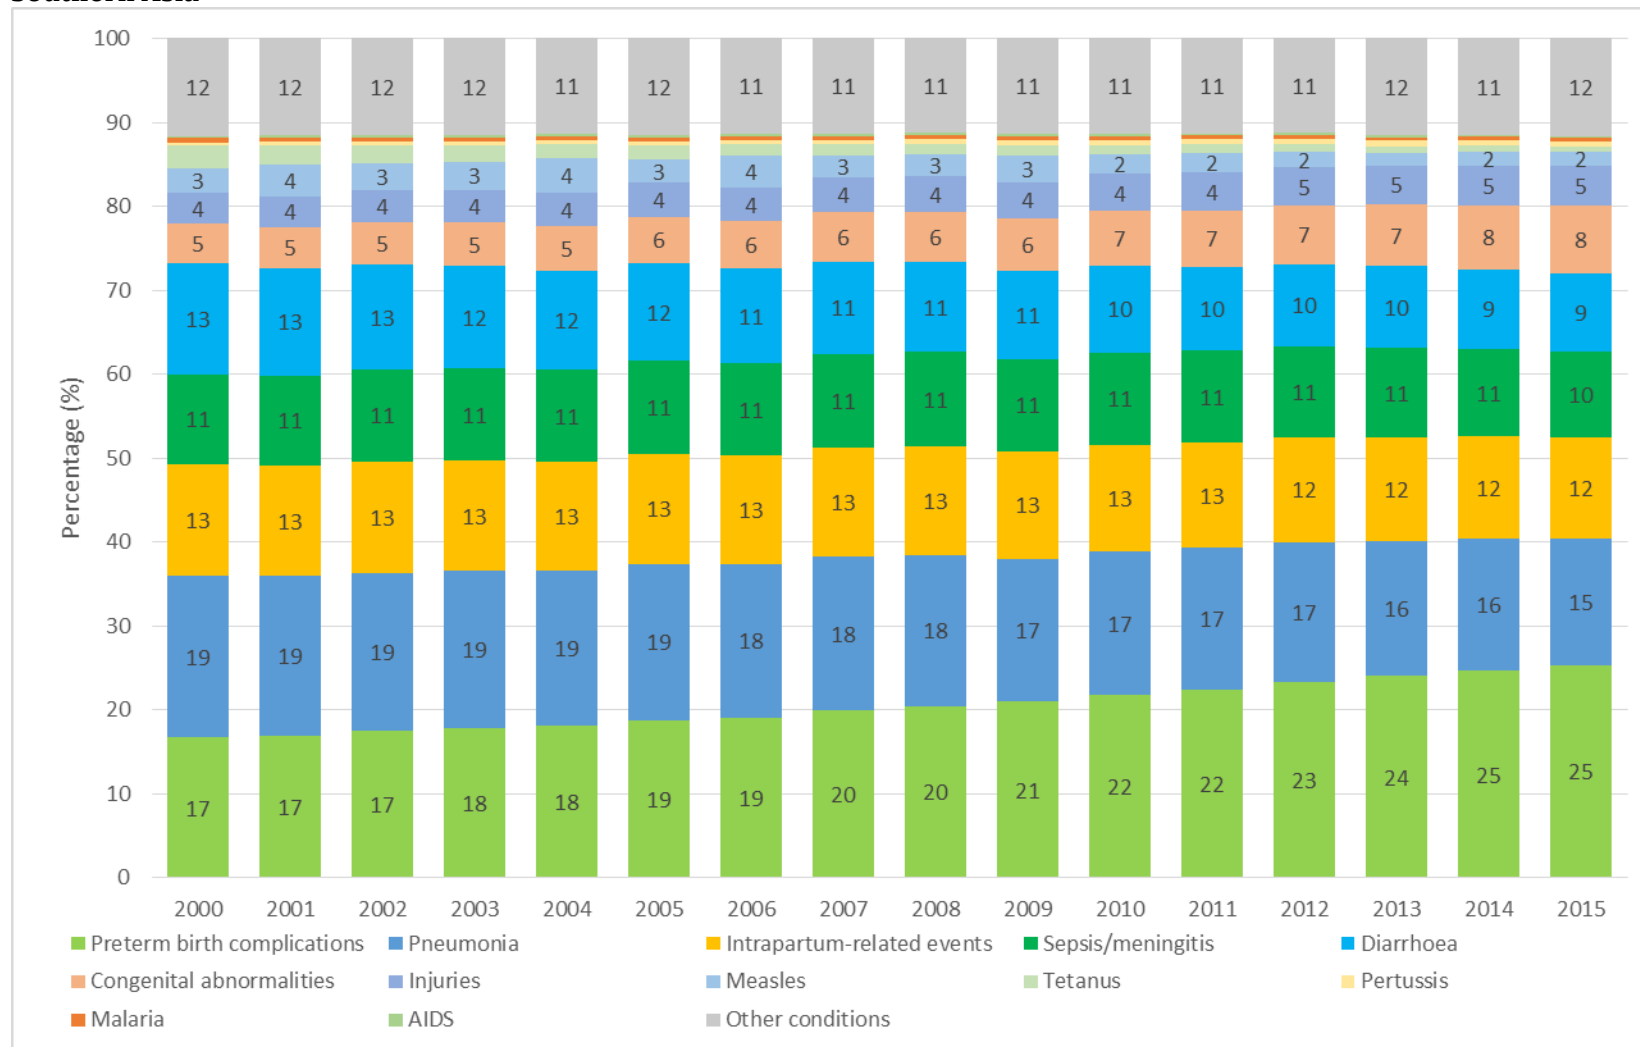

## Sub-Saharan Africa

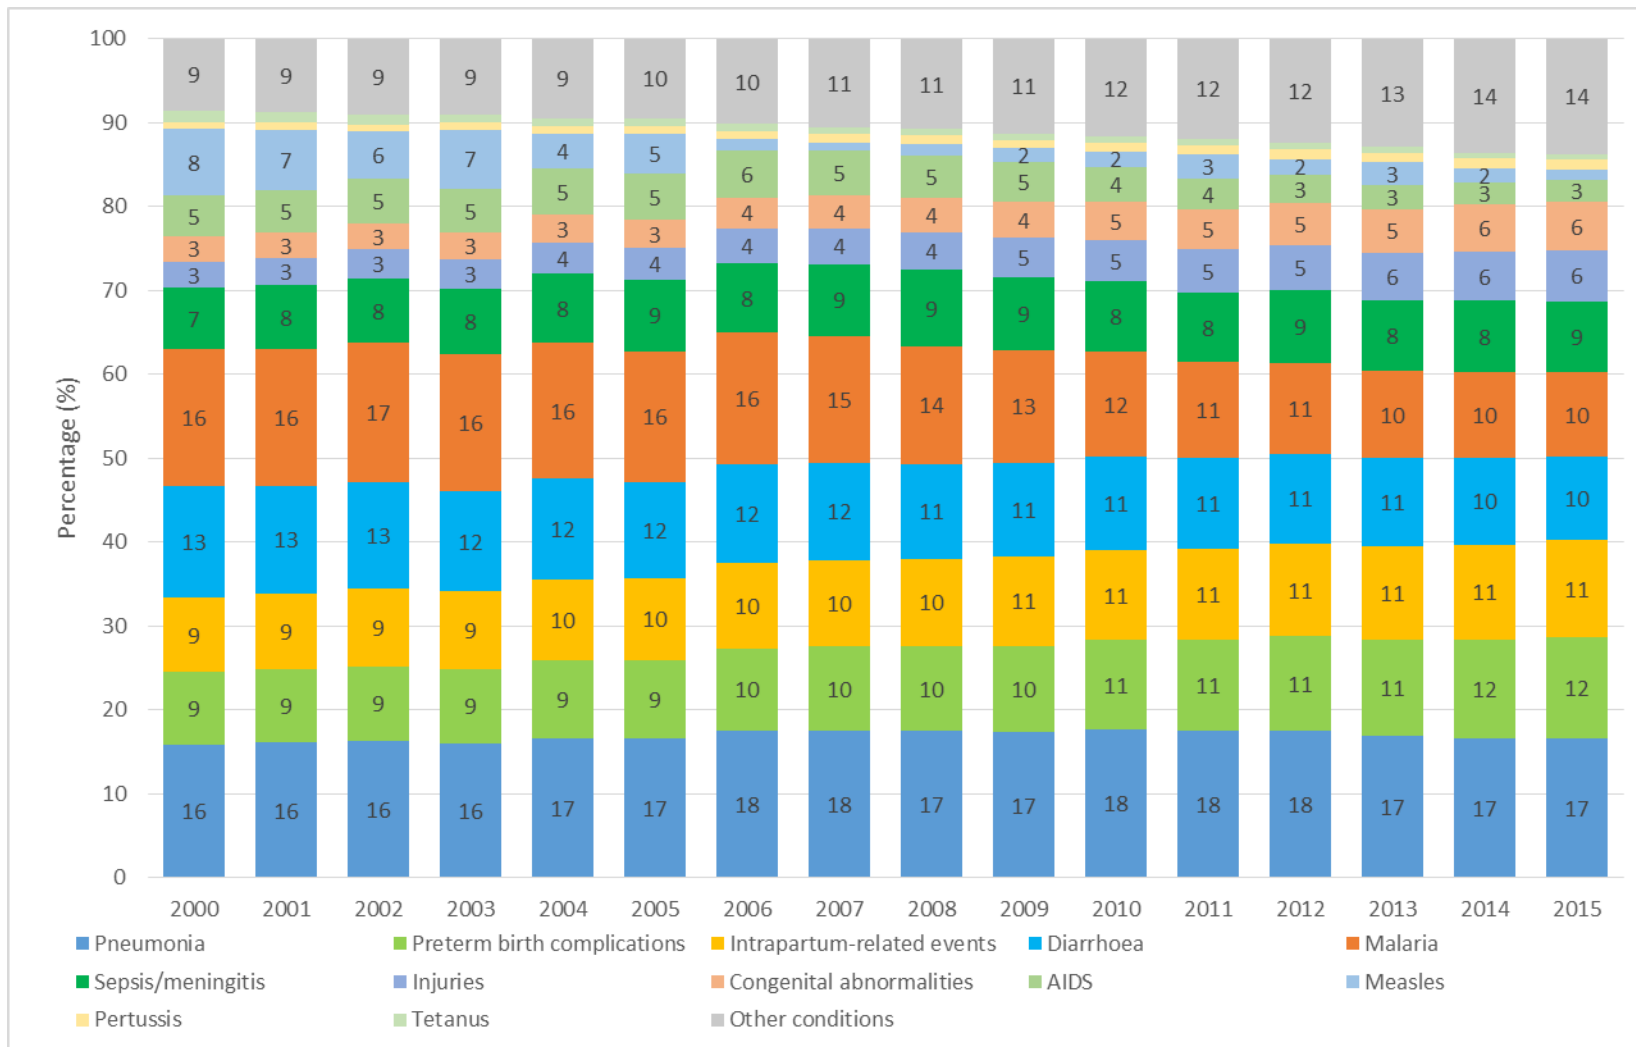

## Western Asia

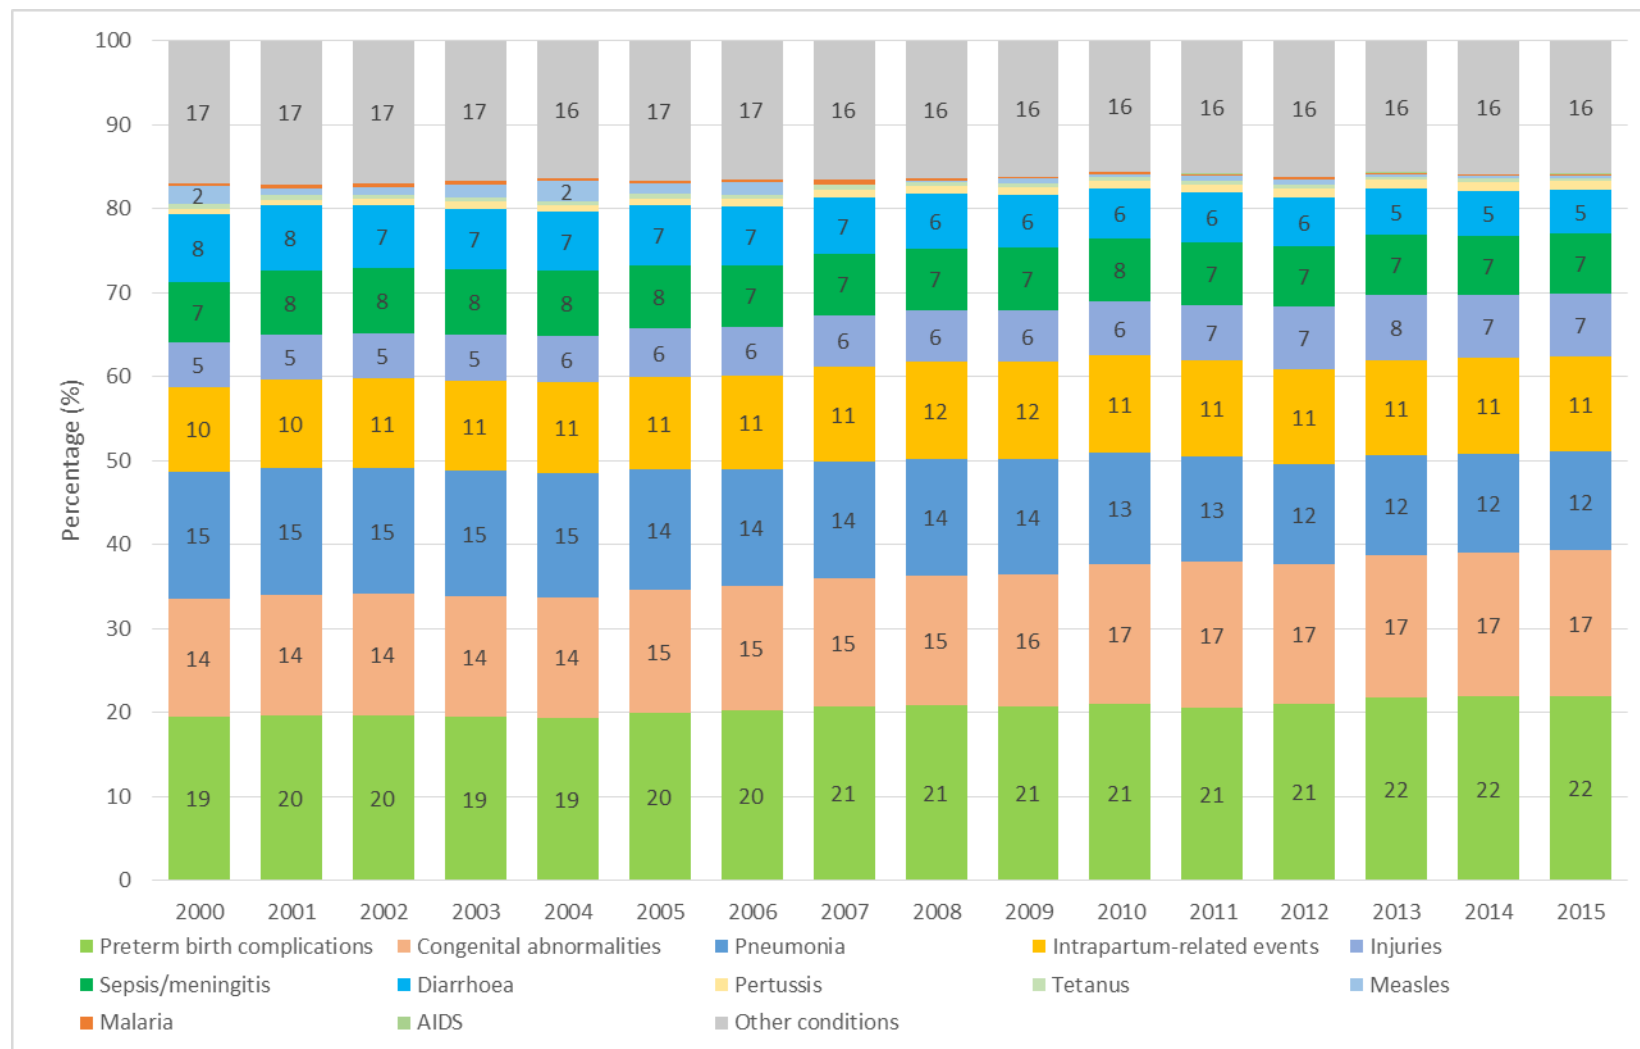

\*CSMFs are not labeled if less than 2%

## Reference

1. Liu L, Johnson HL, Cousens S, et al. Global, regional, and national causes of child mortality: an updated systematic analysis for 2010 with time trends since 2000. *The Lancet* 2012; **379**(9832): 2151-61.
2. Liu L, Oza S, Hogan D, et al. Global, regional, and national causes of child mortality in 2000–13, with projections to inform post-2015 priorities: an updated systematic analysis. *The Lancet* 2015; **385**(9966): 430-40.
3. LLC EP. DistillerSR - Systematic Review and Literature Review Software. 2015. <https://distillercer.com/products/distillersr-systematic-review-software/> (accessed 01/01/2015).
4. Streatfield PK, Khan WA, Bhuiya A, et al. Cause-specific childhood mortality in Africa and Asia: evidence from INDEPTH health and demographic surveillance system sites. *Glob Health Action* 2014; **7**: 25363.
5. Kalter HD, Roubanatou AM, Koffi A, Black RE. Direct estimates of national neonatal and child cause-specific mortality proportions in Niger by expert algorithm and physician-coded analysis of verbal autopsy interviews. *Journal of global health* 2015; **5**(1).
6. India Ministry of Home Affairs. Report on Causes of Death 2004-2006. 2015. <http://www.cghr.org/projects/million-death-study-project/> (accessed 06.22 2015).
7. INDEPTH. INDEPTH Network. <http://www.indepth-network.org/> (accessed January 26, 2015).
8. Bhatt S, Weiss DJ, Cameron E, et al. The effect of malaria control on *Plasmodium falciparum* in Africa between 2000 and 2015. *Nature* 2015; **526**(7572): 207-+.
9. Guerra CA, Gikandi PW, Tatem AJ, et al. The limits and intensity of *Plasmodium falciparum* transmission: implications for malaria control and elimination worldwide. *PLoS Med* 2008; **5**(2): e38. doi:10.1371/journal.pmed.0050038
10. World Health Organization. World Malaria Report 2014. *Geneva: WHO* 2014.
11. Gething PW, Patil AP, Smith DL, et al. A new world malaria map: *Plasmodium falciparum* endemicity in 2010. *Malar J* 2011; **10**(378): 1475-2875.
12. Johnson HL, Deloria-Knoll M, Levine OS, et al. Systematic evaluation of serotypes causing invasive pneumococcal disease among children under five: the pneumococcal global serotype project. *PLoS Med* 2010; **7**(10).
13. Watt JP, Wolfson LJ, O'Brien KL, et al. Burden of disease caused by *Haemophilus influenzae* type b in children younger than 5 years: global estimates. *Lancet* 2009; **374**(9693): 903-11.
14. Davis S, Feikin D, Johnson HL. The effect of *Haemophilus influenzae* type B and pneumococcal conjugate vaccines on childhood meningitis mortality: a systematic review. *BMC Public Health* 2013; **13 Suppl 3**: S21.
15. O'Brien KL, Wolfson LJ, Watt JP, et al. Burden of disease caused by *Streptococcus pneumoniae* in children younger than 5 years: global estimates. *Lancet* 2009; **374**(9693): 893-902.
16. Lanata CF, Fischer-Walker CL, Olascoaga AC, Torres CX, Aryee MJ, Black RE. Global causes of diarrheal disease mortality in children < 5 years of age: a systematic review. *Plos one* 2013; **8**(9): e72788. doi: 10.1371/journal.pone.0072788



17. WUNEIC. WHO/UNICEF Estimates of National Immunization Coverage (WUENIC). Geneva: World Health Organization. 2016
18. Griffiths U, Clark A, Gessner B, et al. Dose-specific efficacy of Haemophilus influenzae type b conjugate vaccines: a systematic review and meta-analysis of controlled clinical trials. *Epidemiology and infection* 2012; **140**(08): 1343-55.
19. Lucero MG, Dulalia VE, Nillos LT, et al. Pneumococcal conjugate vaccines for preventing vaccine-type invasive pneumococcal disease and X-ray defined pneumonia in children less than two years of age. *Cochrane Database Syst Rev* 2009; (4): CD004977. doi: 10.1002/14651858.CD004977.pub2
20. Lamberti LM, Ashraf S, Walker CLF, Black RE. A systematic review of the effect of rotavirus vaccination on diarrhea outcomes among children under-five. *Pediatric Infectious Disease Journal* 2016; **9**. doi: 10.1097/INF.0000000000001232
21. Black RE, Cousens S, Johnson HL, et al. Global, regional, and national causes of child mortality in 2008: a systematic analysis. *The lancet* 2010; **375**(9730): 1969-87.
22. Mosley WH, Chen LC. An analytical framework for the study of child survival in developing countries. *Population and development review* 1984; **10**: 25-45.
